# Supplementary material for: The histone code reader Spin1 controls skeletal muscle development
Source: PubMed Central journal article supplement (PMC5775400; doi:10.1038/cddis.2017.468), 2017-11-23

Supplementary Figure 1 (Greschik et al.)

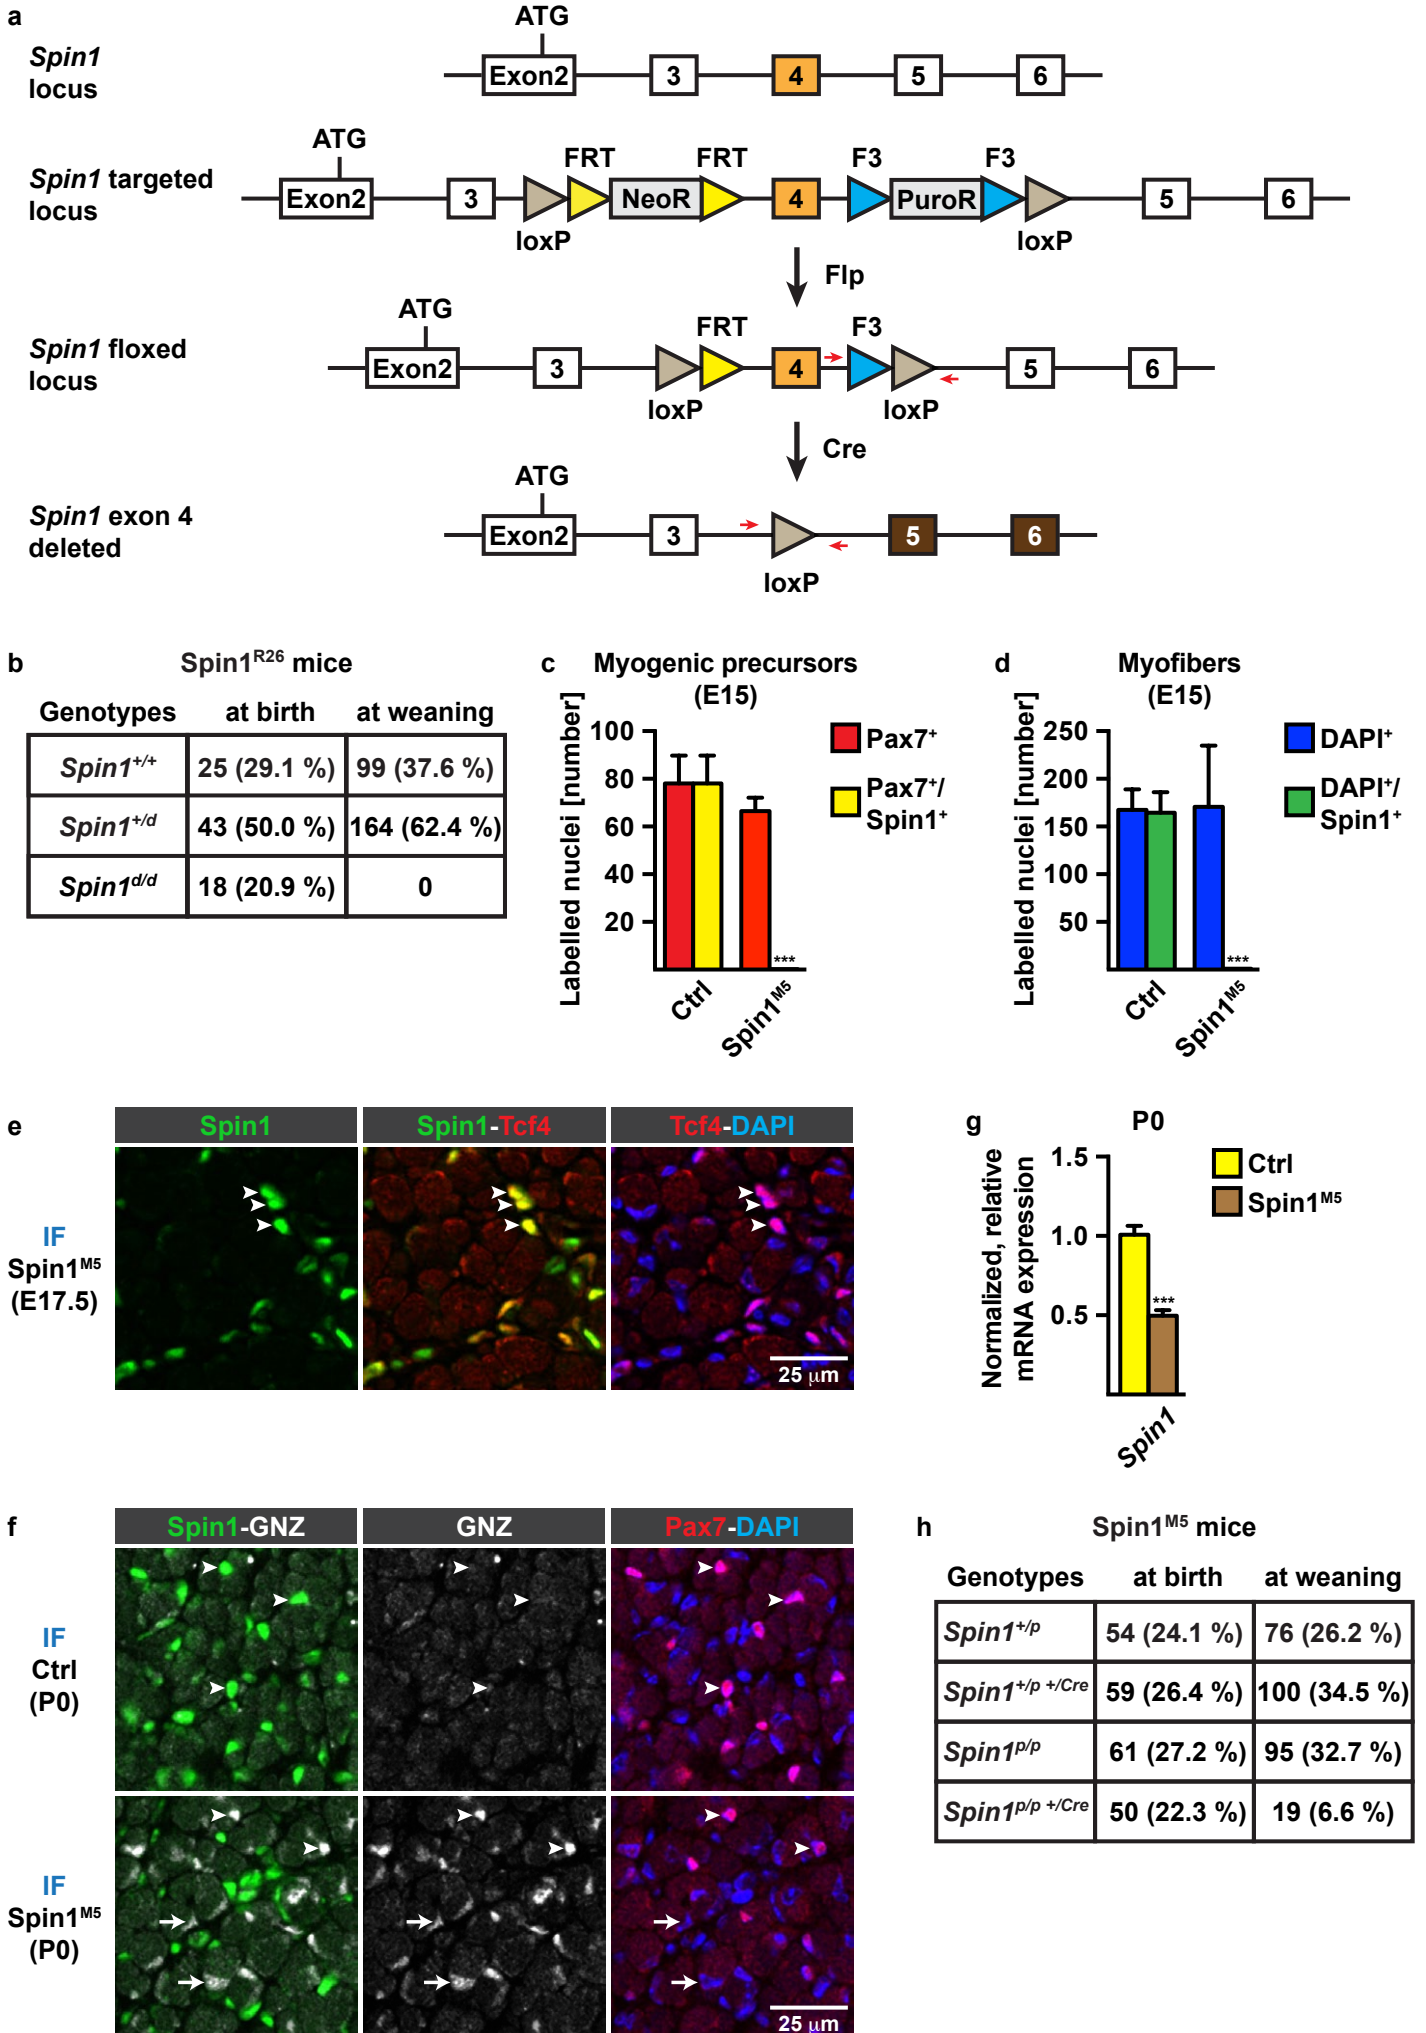

Supplementary Figure 2 (Greschik et al.)

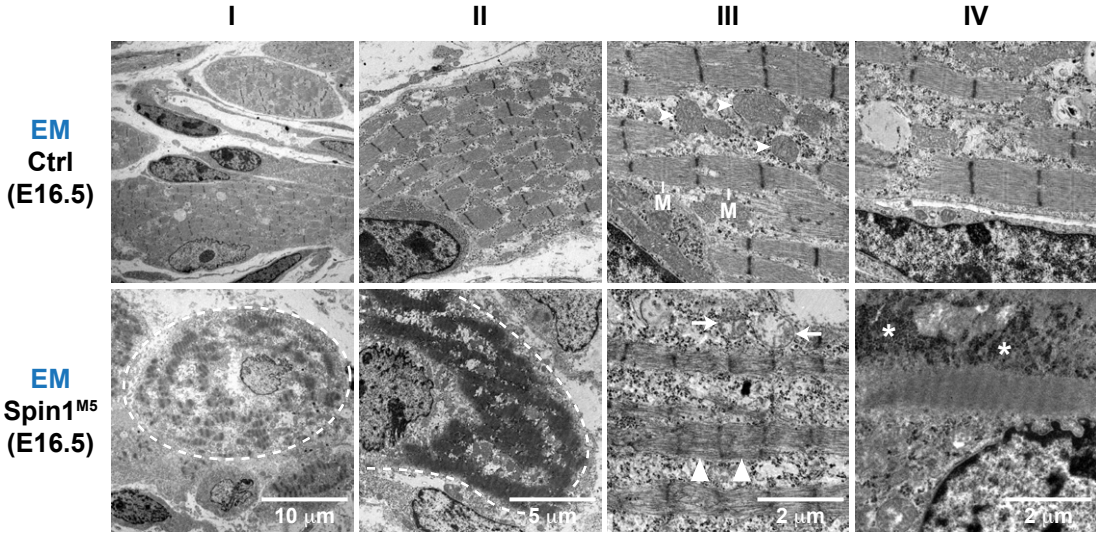

Supplementary Figure 3 (Greschik et al.)

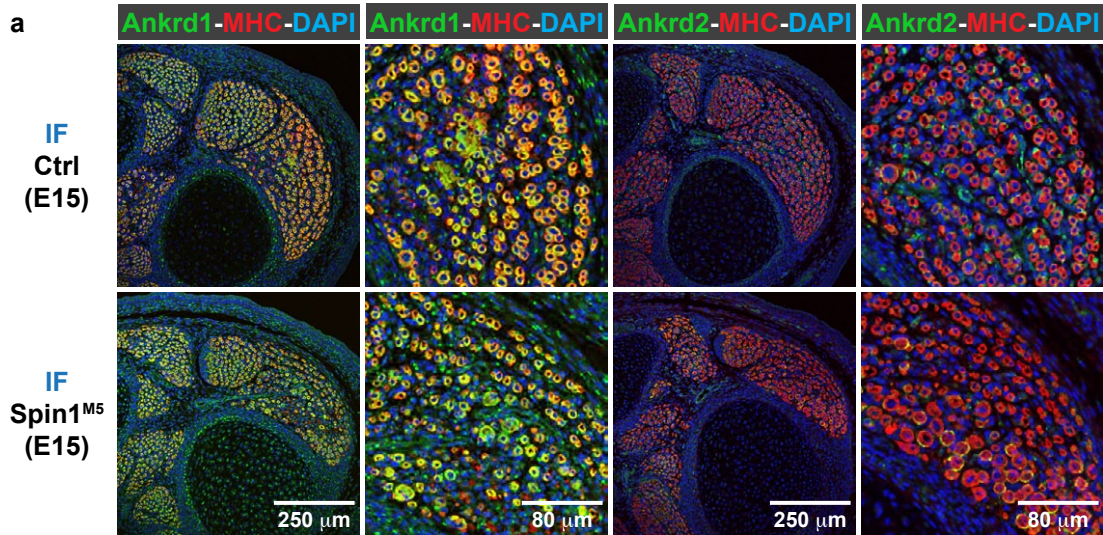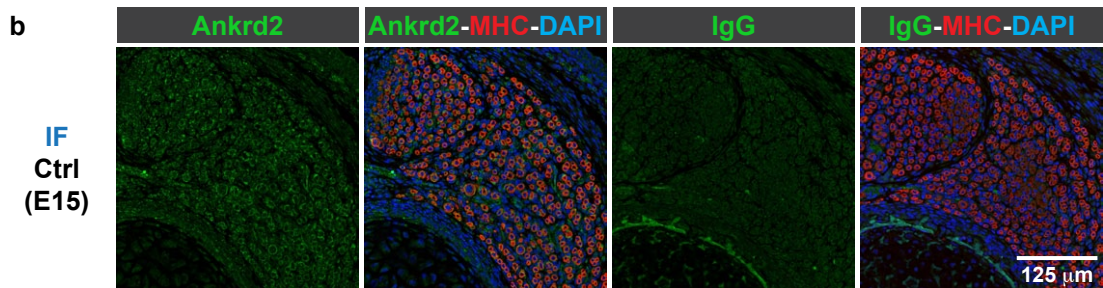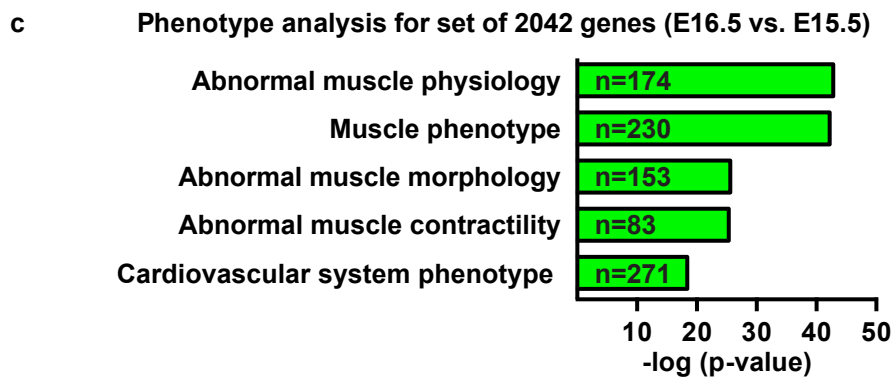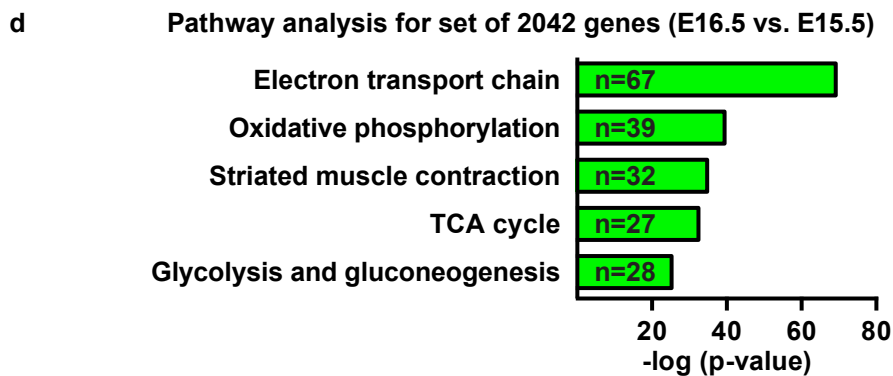



Supplementary Figure 5 (Greschik et al.)

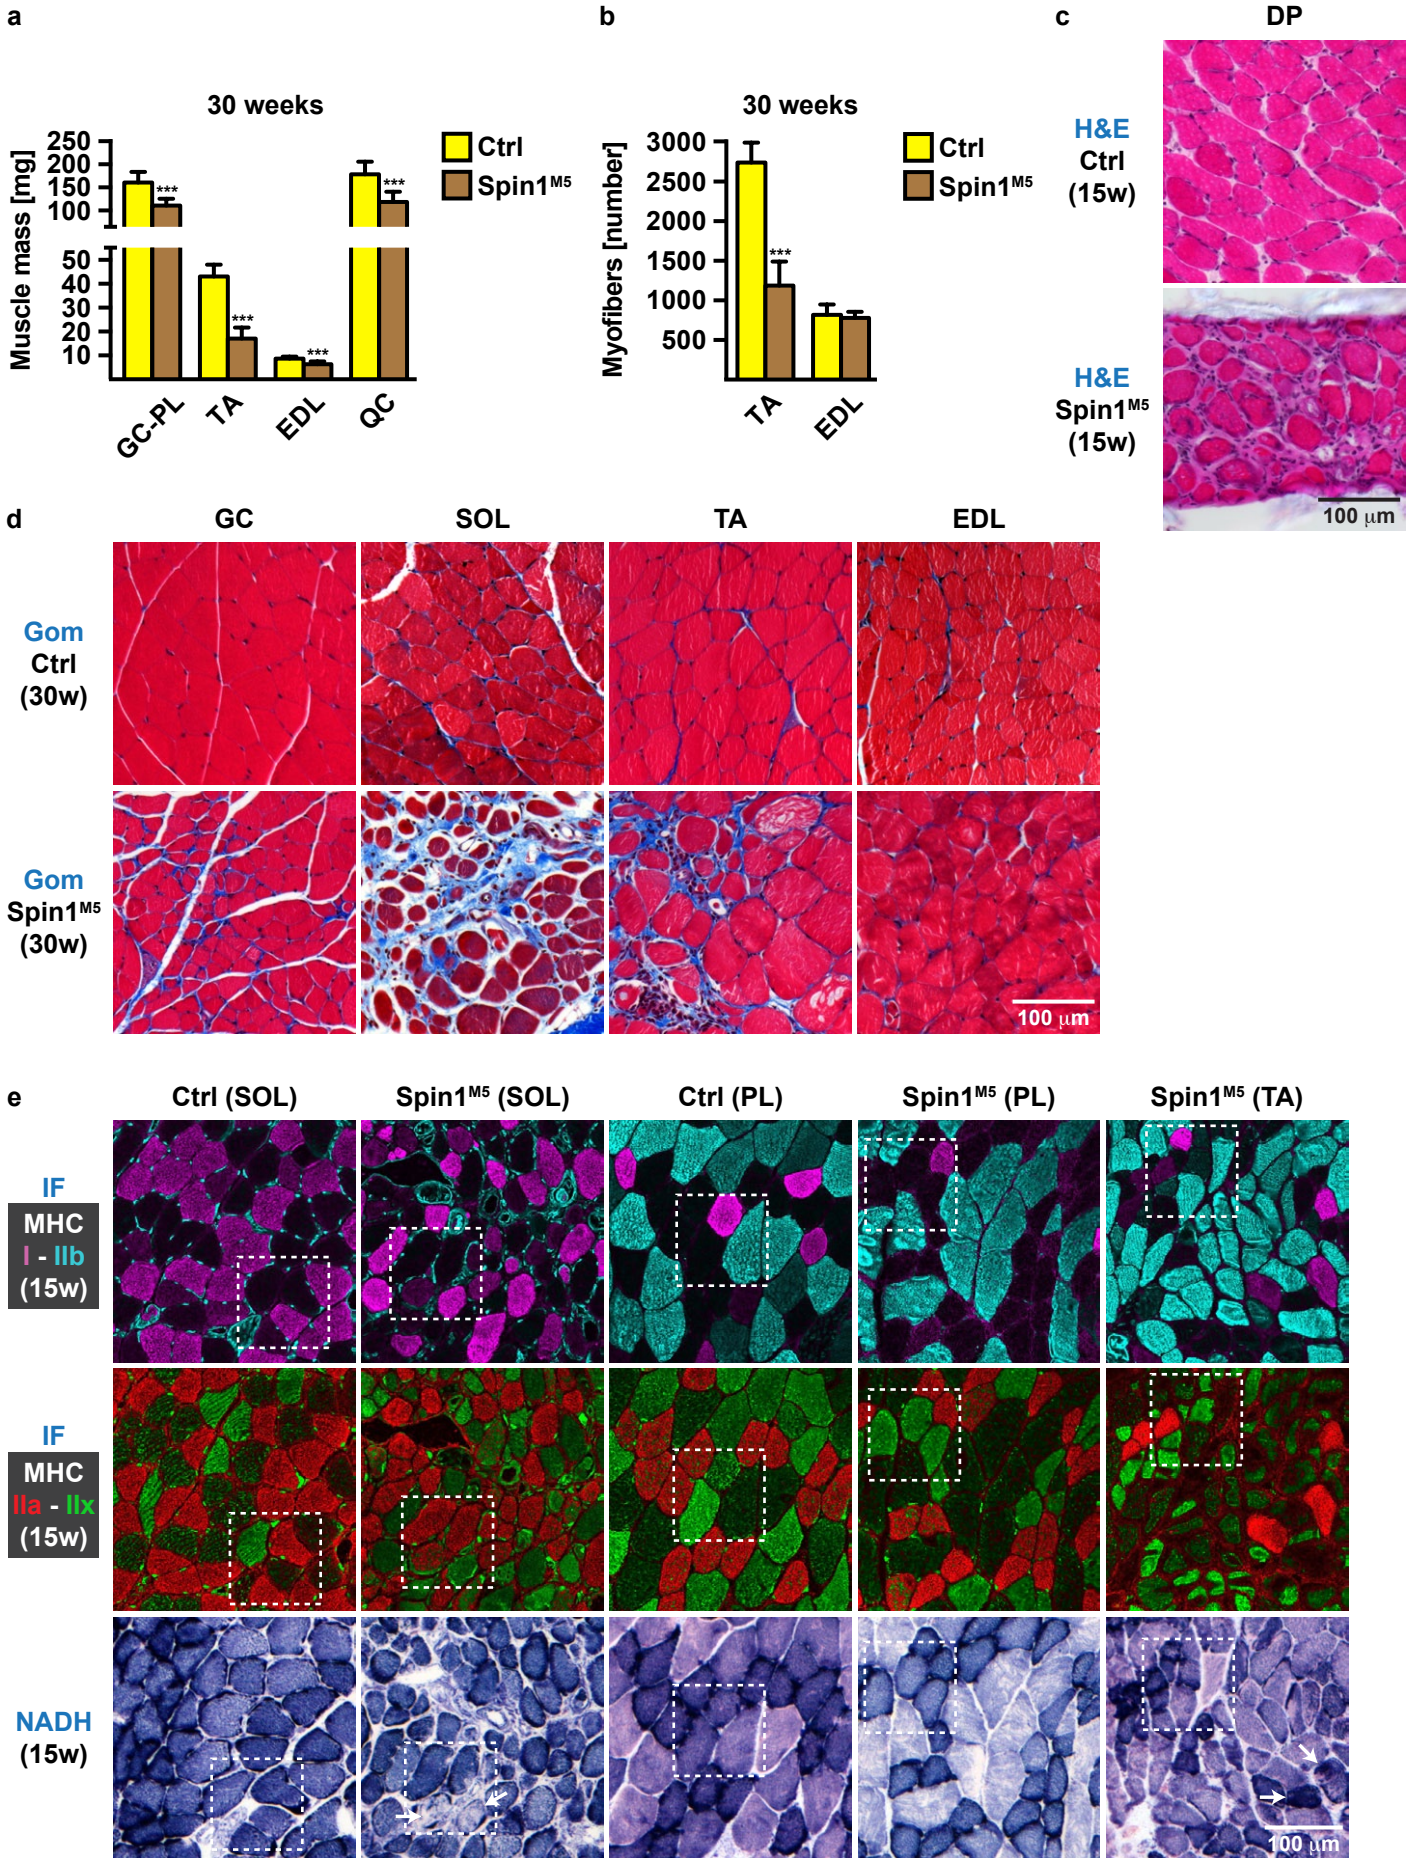

Supplement: cddis2017468x1.pdf [file cddis2017468x1.pdf]
