# Supplementary material for: The histone code reader Spin1 controls skeletal muscle development
Source: PubMed Central journal article supplement (PMC5775400; doi:10.1038/cddis.2017.468), 2017-11-23
Supplement: cddis2017468x2.pdf [file cddis2017468x2.pdf]

Supplementary Table 1a: Differentially expressed genes in SkM of Spin1<sup>MS</sup> compared to control mice at E15.5.

| Gene symbol | FC (Spin1 <sup>MS</sup> vs. Ctrl) | logFC (Spin1 <sup>MS</sup> vs. Ctrl) | FDR     | p-value | Entrez gene | Protein name                                          |
|-------------|-----------------------------------|--------------------------------------|---------|---------|-------------|-------------------------------------------------------|
| Aifm3       | 0.49                              | -1.02                                | 4.1E-01 | 3.5E-04 | 72168       | apoptosis-inducing factor, mitochondrion-associated 3 |
| Ankrd1      | 1.67                              | 0.74                                 | 1.5E-01 | 5.8E-05 | 107765      | ankyrin repeat domain 1 (cardiac muscle)              |
| Ankrd2      | 2.17                              | 1.12                                 | 4.1E-01 | 3.6E-04 | 56642       | ankyrin repeat domain 2 (stretch responsive muscle)   |
| Dbx1        | 0.51                              | -0.96                                | 5.3E-02 | 1.5E-05 | 13172       | developing brain homeobox 1                           |
| Gm7120      | 1.75                              | 0.81                                 | 1.8E-03 | 8.1E-08 | 633640      | predicted gene 7120                                   |
| Hbb-b2      | 1.51                              | 0.59                                 | 6.7E-01 | 9.3E-04 | 15130       | hemoglobin, beta adult minor chain                    |
| Hbb-bt      | 1.51                              | 0.59                                 | 6.7E-01 | 9.4E-04 | 101488143   | hemoglobin, beta adult t chain                        |
| Il17b       | 0.67                              | -0.59                                | 5.3E-02 | 1.6E-05 | 56069       | interleukin 17B                                       |
| Ly6a        | 1.79                              | 0.84                                 | 2.3E-01 | 1.2E-04 | 110454      | lymphocyte antigen 6 complex, locus A                 |
| Msc         | 0.62                              | -0.68                                | 4.4E-02 | 8.7E-06 | 17681       | musculin                                              |
| Myf5        | 0.56                              | -0.82                                | 3.9E-01 | 2.3E-04 | 17877       | myogenic factor 5                                     |
| Nos1        | 0.43                              | -1.22                                | 2.2E-01 | 9.9E-05 | 18125       | nitric oxide synthase 1, neuronal                     |
| Pmaip1      | 1.95                              | 0.96                                 | 1.8E-03 | 1.2E-07 | 58801       | phorbol-12-myristate-13-acetate-induced protein 1     |
| Scn4b       | 2.04                              | 1.03                                 | 4.5E-02 | 1.0E-05 | 399548      | sodium channel, type IV, beta                         |
| Snai3       | 0.53                              | -0.92                                | 1.7E-01 | 7.0E-05 | 30927       | snail homolog 3                                       |
| Snca        | 1.57                              | 0.65                                 | 6.1E-01 | 6.2E-04 | 20617       | synuclein, alpha                                      |
| Spin1       | see Supplementary Table 1e        |                                      |         |         | 20729       | spindlin 1                                            |
| Tpm3        | 0.49                              | -1.02                                | 6.7E-01 | 9.4E-04 | 59069       | tropomyosin 3, gamma                                  |

upregulated (red)

downregulated (blue)

Supplementary Table 1b: Differentially expressed genes in SkM of Spin1<sup>M5</sup> compared to control mice at E16.5.

| Gene symbol   | FC (Spin1 <sup>M5</sup> vs. Ctrl) | logFC (Spin1 <sup>M5</sup> vs. Ctrl) | FDR     | p-value | Entrez gene | Protein name                                                             |
|---------------|-----------------------------------|--------------------------------------|---------|---------|-------------|--------------------------------------------------------------------------|
| I200014J11Rik | 1.62                              | 0.70                                 | 2.1E-04 | 4.9E-07 | 66874       | RIKEN cDNA I200014J11 gene                                               |
| 6430571L13Rik | 0.40                              | -1.33                                | 1.6E-03 | 5.7E-06 | 235599      | RIKEN cDNA 6430571L13 gene                                               |
| A630019I02Rik | 0.51                              | -0.98                                | 4.6E-04 | 1.3E-06 | 408254      | uncharacterized LOC408254                                                |
| A930016O22Rik | 0.66                              | -0.60                                | 8.0E-02 | 9.9E-04 | 100503495   | RIKEN cDNA A930016O22 gene                                               |
| Abea5         | 0.64                              | -0.64                                | 2.0E-02 | 1.3E-04 | 217265      | ATP-binding cassette, sub-family A (ABC1), member 5                      |
| Acacb         | 0.49                              | -1.04                                | 6.5E-09 | 3.0E-12 | 100705      | acetyl-Coenzyme A carboxylase beta                                       |
| Ache          | 1.70                              | 0.76                                 | 1.0E-02 | 5.2E-05 | 11423       | acetylcholinesterase                                                     |
| Acot11        | 0.57                              | -0.81                                | 4.9E-05 | 7.9E-08 | 329910      | acyl-CoA thioesterase 11                                                 |
| Acs1          | 0.48                              | -1.06                                | 5.0E-03 | 2.0E-05 | 14081       | acyl-CoA synthetase long-chain family member 1                           |
| Acss3         | 0.43                              | -1.21                                | 5.0E-02 | 5.1E-04 | 380660      | acyl-CoA synthetase short-chain family member 3                          |
| Actn3         | 0.65                              | -0.62                                | 1.3E-02 | 7.3E-05 | 11474       | actinin alpha 3                                                          |
| Adeck3        | 0.65                              | -0.62                                | 5.2E-02 | 5.4E-04 | 67426       | aarF domain containing kinase 3                                          |
| Adcyap1r1     | 0.59                              | -0.75                                | 1.1E-02 | 5.6E-05 | 11517       | adenylate cyclase activating polypeptide 1 receptor 1                    |
| Adhfe1        | 0.25                              | -2.00                                | 4.1E-02 | 3.9E-04 | 76187       | alcohol dehydrogenase, iron containing, 1                                |
| Adora1        | 1.74                              | 0.80                                 | 4.3E-05 | 6.4E-08 | 11539       | adenosine A1 receptor                                                    |
| Agbl1         | 0.32                              | -1.65                                | 4.2E-03 | 1.6E-05 | 244071      | ATP/GTP binding protein-like 1                                           |
| Aldh4a1       | 0.55                              | -0.87                                | 1.1E-06 | 9.4E-10 | 212647      | aldehyde dehydrogenase 4 family, member A1                               |
| Aldh6a1       | 0.58                              | -0.79                                | 3.3E-02 | 2.6E-04 | 104776      | aldehyde dehydrogenase family 6, subfamily A1                            |
| Amigo1        | 0.66                              | -0.59                                | 6.1E-03 | 2.7E-05 | 229715      | adhesion molecule with Ig like domain 1                                  |
| Ampd1         | 0.65                              | -0.63                                | 1.7E-03 | 6.1E-06 | 229665      | adenosine monophosphate deaminase 1                                      |
| Ankrd1        | 2.95                              | 1.56                                 | 4.1E-06 | 4.0E-09 | 107765      | ankyrin repeat domain 1 (cardiac muscle)                                 |
| Ankrd2        | 4.51                              | 2.17                                 | 9.9E-13 | 6.5E-17 | 56642       | ankyrin repeat domain 2 (stretch responsive muscle)                      |
| Ankrd23       | 1.94                              | 0.95                                 | 1.1E-06 | 9.2E-10 | 78321       | ankyrin repeat domain 23                                                 |
| Ankrd9        | 0.58                              | -0.80                                | 4.3E-03 | 1.7E-05 | 74251       | ankyrin repeat domain 9                                                  |
| ApoE          | 1.62                              | 0.69                                 | 2.4E-02 | 1.7E-04 | 11816       | apolipoprotein E                                                         |
| Aqp4          | 0.05                              | -4.20                                | 6.2E-11 | 1.4E-14 | 11829       | aquaporin 4                                                              |
| Arhgap36      | 0.59                              | -0.75                                | 3.3E-05 | 4.3E-08 | 75404       | Rho GTPase activating protein 36                                         |
| Arpp21        | 1.62                              | 0.69                                 | 2.8E-02 | 2.1E-04 | 74100       | cyclic AMP-regulated phosphoprotein, 21                                  |
| Art3          | 0.63                              | -0.68                                | 1.5E-02 | 9.0E-05 | 109979      | ADP-ribosyltransferase 3                                                 |
| Atcay         | 0.57                              | -0.82                                | 6.5E-02 | 7.5E-04 | 16467       | ataxia, cerebellar, Cayman type homolog                                  |
| Atp1b2        | 0.52                              | -0.94                                | 3.1E-08 | 2.2E-11 | 11932       | ATPase, Na <sup>+</sup> /K <sup>+</sup> transporting, beta 2 polypeptide |
| Atp2a1        | 0.62                              | -0.68                                | 6.0E-04 | 1.7E-06 | 11937       | ATPase, Ca <sup>++</sup> transporting, cardiac muscle, fast twitch 1     |
| Atp2b3        | 0.46                              | -1.13                                | 3.7E-04 | 9.5E-07 | 320707      | ATPase, Ca <sup>++</sup> transporting, plasma membrane 3                 |
| Baiap211      | 1.78                              | 0.83                                 | 2.1E-03 | 7.7E-06 | 66898       | BAI1-associated protein 2-like 1                                         |
| Bche          | 0.64                              | -0.64                                | 8.3E-03 | 3.9E-05 | 12038       | butyrylcholinesterase                                                    |
| C1qa          | 1.77                              | 0.82                                 | 1.7E-03 | 6.0E-06 | 12259       | complement component 1, q subcomponent, alpha polypeptide                |
| C1qb          | 1.74                              | 0.80                                 | 1.1E-04 | 2.0E-07 | 12260       | complement component 1, q subcomponent, beta polypeptide                 |
| C1qc          | 1.69                              | 0.75                                 | 2.6E-04 | 6.1E-07 | 12262       | complement component 1, q subcomponent, C chain                          |
| C3            | 0.17                              | -2.52                                | 1.2E-02 | 6.7E-05 | 12266       | complement component 3                                                   |
| C3ar1         | 1.83                              | 0.87                                 | 3.5E-02 | 2.9E-04 | 12267       | complement component 3a receptor 1                                       |
| Car3          | 0.44                              | -1.18                                | 4.8E-03 | 1.9E-05 | 12350       | carbonic anhydrase 3                                                     |
| Casq1         | 0.61                              | -0.71                                | 1.3E-04 | 2.4E-07 | 12372       | calsequestrin 1                                                          |
| Ccdc23        | 1.68                              | 0.75                                 | 2.1E-04 | 4.8E-07 | 69216       | coiled-coil domain containing 23                                         |
| Ccdc69        | 0.56                              | -0.85                                | 5.7E-02 | 6.0E-04 | 52570       | coiled-coil domain containing 69                                         |
| Cek           | 2.15                              | 1.11                                 | 1.2E-02 | 6.3E-05 | 12424       | cholecystokinin                                                          |
| Cene1         | 1.58                              | 0.66                                 | 3.3E-03 | 1.2E-05 | 12447       | cyclin E1                                                                |
| Cd68          | 1.60                              | 0.68                                 | 3.0E-02 | 2.4E-04 | 12514       | CD68 antigen                                                             |
| Cd82          | 1.54                              | 0.62                                 | 5.0E-03 | 2.0E-05 | 12521       | CD82 antigen                                                             |
| Chrna9        | 0.22                              | -2.17                                | 2.3E-08 | 1.4E-11 | 231252      | cholinergic receptor, nicotinic, alpha polypeptide 9                     |
| Cilp          | 1.95                              | 0.96                                 | 4.1E-04 | 1.1E-06 | 214425      | cartilage intermediate layer protein, nucleotide pyrophosphohydrolase    |
| Ckm           | 0.65                              | -0.62                                | 6.8E-02 | 7.9E-04 | 12715       | creatine kinase, muscle                                                  |
| Ckmt2         | 0.60                              | -0.73                                | 2.1E-04 | 4.5E-07 | 76722       | creatine kinase, mitochondrial 2                                         |
| Cln1          | 0.54                              | -0.88                                | 6.1E-02 | 6.8E-04 | 12723       | chloride channel 1                                                       |
| Clec4n        | 2.26                              | 1.18                                 | 2.8E-02 | 2.1E-04 | 56620       | C-type lectin domain family 4, member n                                  |
| Clec7a        | 3.25                              | 1.70                                 | 6.8E-04 | 2.1E-06 | 56644       | C-type lectin domain family 7, member a                                  |
| Clic5         | 0.49                              | -1.02                                | 1.6E-02 | 1.0E-04 | 224796      | chloride intracellular channel 5                                         |
| Cmb1          | 0.37                              | -1.45                                | 5.0E-09 | 2.1E-12 | 69574       | carboxymethylenebutenolidase-like                                        |
| Cmya5         | 0.59                              | -0.76                                | 6.1E-05 | 1.1E-07 | 76469       | cardiomyopathy associated 5                                              |
| Col19a1       | 1.61                              | 0.68                                 | 2.4E-02 | 1.7E-04 | 12823       | collagen, type XIX, alpha 1                                              |
| Cox8b         | 0.65                              | -0.63                                | 7.4E-02 | 8.8E-04 | 12869       | cytochrome c oxidase, subunit VIIIb                                      |
| Cpt1b         | 0.52                              | -0.94                                | 2.7E-08 | 1.7E-11 | 12895       | carnitine palmitoyltransferase 1b, muscle                                |
| Crat          | 0.60                              | -0.75                                | 1.6E-05 | 2.0E-08 | 12908       | carnitine acetyltransferase                                              |
| Ctss          | 2.03                              | 1.02                                 | 1.3E-04 | 2.4E-07 | 13040       | cathepsin S                                                              |
| Cx3cr1        | 1.68                              | 0.74                                 | 2.2E-02 | 1.5E-04 | 13051       | chemokine (C-X3-C) receptor 1                                            |
| Dbandd1       | 2.53                              | 1.34                                 | 2.2E-04 | 5.1E-07 | 72185       | dysbindin (dystrobrexin binding protein 1) domain containing 1           |
| Ddit4l        | 0.63                              | -0.67                                | 4.0E-02 | 3.7E-04 | 73284       | DNA-damage-inducible transcript 4-like                                   |
| Dnaic1        | 0.44                              | -1.20                                | 1.5E-02 | 8.8E-05 | 68922       | dynein, axonemal, intermediate chain 1                                   |
| Dok7          | 1.86                              | 0.90                                 | 1.6E-03 | 5.4E-06 | 231134      | doocking protein 7                                                       |
| Eda2r         | 1.60                              | 0.68                                 | 5.7E-02 | 5.9E-04 | 245527      | ectodysplasin A2 receptor                                                |
| Eef1a2        | 0.39                              | -1.38                                | 2.5E-12 | 3.1E-16 | 13628       | eukaryotic translation elongation factor 1 alpha 2                       |
| Egr1          | 1.55                              | 0.63                                 | 4.8E-03 | 1.9E-05 | 13653       | early growth response 1                                                  |
| Eno3          | 0.65                              | -0.63                                | 5.0E-03 | 2.1E-05 | 13808       | enolase 3, beta muscle                                                   |
| Ephx1         | 0.63                              | -0.66                                | 1.7E-02 | 1.0E-04 | 13849       | epoxide hydrolase 1, microsomal                                          |
| Ermapp        | 2.63                              | 1.39                                 | 9.7E-04 | 3.0E-06 | 27028       | erythroblast membrane-associated protein                                 |
| Extl1         | 0.42                              | -1.26                                | 2.3E-02 | 1.5E-04 | 56219       | exostosins (multiple)-like 1                                             |
| Fam131a       | 0.58                              | -0.78                                | 3.5E-04 | 8.9E-07 | 78408       | family with sequence similarity 131, member A                            |
| Fbp2          | 0.62                              | -0.69                                | 3.3E-02 | 2.7E-04 | 14120       | fructose biphosphatase 2                                                 |
| Fbxl22        | 0.57                              | -0.82                                | 4.6E-05 | 7.1E-08 | 74165       | F-box and leucine-rich repeat protein 22                                 |
| Fbxo17        | 1.52                              | 0.60                                 | 2.6E-02 | 1.9E-04 | 50760       | F-box protein 17                                                         |
| Fcrls         | 1.64                              | 0.71                                 | 2.6E-02 | 1.9E-04 | 80891       | Fc receptor-like S, scavenger receptor                                   |
| Frrmpd1       | 1.61                              | 0.69                                 | 2.8E-02 | 2.1E-04 | 666060      | FERM and PDZ domain containing 1                                         |
| Frzb          | 0.59                              | -0.75                                | 2.5E-03 | 9.1E-06 | 20378       | frizzled-related protein                                                 |
| Fsd2          | 0.61                              | -0.72                                | 4.7E-05 | 7.4E-08 | 244091      | fibronectin type III and SPRY domain containing 2                        |
| Glb1l2        | 0.29                              | -1.78                                | 9.7E-03 | 4.8E-05 | 244757      | galactosidase, beta 1-like 2                                             |
| Glis1         | 0.49                              | -1.04                                | 4.0E-02 | 3.6E-04 | 230587      | GLIS family zinc finger 1                                                |
| Gm44502       | 0.59                              | -0.75                                | 4.2E-05 | 6.0E-08 | 100134861   | predicted readthrough transcript (NMD candidate) 44502                   |
| Gm5111        | 0.41                              | -1.28                                | 1.1E-02 | 6.0E-05 | 330305      | predicted gene 5111                                                      |
| Gm7325        | 2.18                              | 1.13                                 | 5.4E-06 | 5.6E-09 | 653016      | predicted gene 7325                                                      |
| Gpnmb         | 3.01                              | 1.59                                 | 1.3E-05 | 1.6E-08 | 93695       | glycoprotein (transmembrane) nmb                                         |
| Grip2         | 0.64                              | -0.64                                | 2.9E-02 | 2.2E-04 | 243547      | glutamate receptor interacting protein 2                                 |
| Hes6          | 1.55                              | 0.63                                 | 2.3E-02 | 1.5E-04 | 55927       | hairy and enhancer of split 6                                            |
| Hhat1         | 0.67                              | -0.59                                | 3.9E-02 | 3.5E-04 | 74770       | hedgehog acyltransferase-like                                            |
| Hk2           | 0.58                              | -0.77                                | 3.7E-05 | 4.9E-08 | 15277       | hexokinase 2                                                             |
| Hrasls        | 0.36                              | -1.49                                | 6.2E-04 | 1.9E-06 | 27281       | HRAS-like suppressor                                                     |
| Hspb6         | 0.54                              | -0.88                                | 9.1E-07 | 7.5E-10 | 243912      | heat shock protein, alpha-crystallin-related, B6                         |
| Idh3a         | 0.66                              | -0.60                                | 9.3E-03 | 4.5E-05 | 67834       | isocitrate dehydrogenase 3 (NAD <sup>+</sup> ) alpha                     |
| Igf2os        | 1.71                              | 0.78                                 | 8.9E-06 | 1.0E-08 | 111975      | insulin-like growth factor 2, opposite strand                            |
| Isyna1        | 1.94                              | 0.95                                 | 9.6E-08 | 7.3E-11 | 71780       | myo-inositol 1-phosphate synthase A1                                     |
| Kbtbd13       | 0.54                              | -0.89                                | 5.0E-02 | 5.1E-04 | 74492       | kelch repeat and BTB (POZ) domain containing 13                          |
| Kcna7         | 0.48                              | -1.06                                | 3.5E-02 | 3.0E-04 | 16495       | potassium voltage-gated channel, shaker-related subfamily, member 7      |
| Kcnj12        | 0.59                              | -0.76                                | 3.9E-02 | 3.5E-04 | 16515       | potassium inwardly-rectifying channel, subfamily J, member 12            |

|          |                            |       |         |         |        |                                                                                        |
|----------|----------------------------|-------|---------|---------|--------|----------------------------------------------------------------------------------------|
| Kcnk13   | 1.99                       | 0.99  | 1.0E-02 | 5.0E-05 | 217826 | potassium channel, subfamily K, member 13                                              |
| Kl       | 0.26                       | -1.96 | 1.2E-06 | 1.1E-09 | 16591  | klotho                                                                                 |
| Krt8     | 0.48                       | -1.05 | 3.2E-02 | 2.5E-04 | 16691  | keratin 8                                                                              |
| Lmnb2    | 1.52                       | 0.60  | 7.7E-03 | 3.6E-05 | 16907  | lamin B2                                                                               |
| Lpin1    | 0.59                       | -0.75 | 2.2E-02 | 1.4E-04 | 14245  | lipin 1                                                                                |
| Ly86     | 2.42                       | 1.28  | 1.3E-02 | 7.2E-05 | 17084  | lymphocyte antigen 86                                                                  |
| Lyz2     | 1.75                       | 0.81  | 3.3E-02 | 2.6E-04 | 17105  | lysozyme 2                                                                             |
| Lzts3    | 1.68                       | 0.75  | 5.8E-02 | 6.1E-04 | 241638 | leucine zipper, putative tumor suppressor family member 3                              |
| Map3k7cl | 1.80                       | 0.84  | 5.9E-05 | 1.0E-07 | 224419 | Map3k7 C-terminal like                                                                 |
| Mec4r    | 2.33                       | 1.22  | 4.4E-02 | 4.4E-04 | 17202  | melanocortin 4 receptor                                                                |
| Mettl21c | 0.43                       | -1.21 | 4.4E-02 | 4.3E-04 | 433294 | methyltransferase like 21C                                                             |
| Mettl21e | 0.37                       | -1.42 | 1.3E-08 | 6.2E-12 | 403183 | methyltransferase like 21E                                                             |
| Mifi1    | 0.57                       | -0.80 | 1.2E-03 | 3.7E-06 | 17349  | myeloid leukemia factor 1                                                              |
| Mpeg1    | 2.40                       | 1.26  | 9.8E-10 | 3.5E-13 | 17476  | macrophage expressed gene 1                                                            |
| Msc      | 0.54                       | -0.89 | 2.2E-02 | 1.4E-04 | 17681  | musculin                                                                               |
| Mtus2    | 0.56                       | -0.84 | 6.5E-02 | 7.4E-04 | 77521  | microtubule associated tumor suppressor candidate 2                                    |
| Myadml2  | 0.66                       | -0.59 | 6.0E-02 | 6.6E-04 | 68515  | myeloid-associated differentiation marker-like 2                                       |
| Mybpc2   | 0.30                       | -1.74 | 2.5E-12 | 3.2E-16 | 233199 | myosin binding protein C, fast-type                                                    |
| Mybph    | 1.71                       | 0.78  | 2.2E-04 | 5.0E-07 | 53311  | myosin binding protein H                                                               |
| Myf5     | 0.43                       | -1.23 | 4.3E-04 | 1.2E-06 | 17877  | myogenic factor 5                                                                      |
| Myh11    | 0.67                       | -0.59 | 5.9E-02 | 6.2E-04 | 17880  | myosin, heavy polypeptide 11, smooth muscle                                            |
| Myh13    | 0.22                       | -2.15 | 2.9E-02 | 2.2E-04 | 544791 | myosin, heavy polypeptide 13, skeletal muscle                                          |
| Myh8     | 0.62                       | -0.70 | 1.4E-03 | 4.6E-06 | 17885  | myosin, heavy polypeptide 8, skeletal muscle, perinatal                                |
| Myo5c    | 0.46                       | -1.11 | 3.4E-02 | 2.8E-04 | 208943 | myosin VC                                                                              |
| Myog     | 2.05                       | 1.04  | 8.1E-07 | 6.3E-10 | 17928  | myogenin                                                                               |
| Myoz1    | 0.61                       | -0.72 | 9.4E-03 | 4.7E-05 | 59011  | myozenin 1                                                                             |
| Myoz3    | 0.32                       | -1.65 | 1.1E-10 | 3.2E-14 | 170947 | myozenin 3                                                                             |
| Ndrgr2   | 0.51                       | -0.97 | 6.3E-06 | 7.0E-09 | 29811  | N-myc downstream regulated gene 2                                                      |
| Nos1     | 0.27                       | -1.87 | 2.7E-11 | 4.5E-15 | 18125  | nitric oxide synthase 1, neuronal                                                      |
| Notch3   | 0.66                       | -0.59 | 2.3E-02 | 1.5E-04 | 18131  | notch 3                                                                                |
| Otog     | 2.04                       | 1.03  | 3.3E-02 | 2.6E-04 | 18419  | otogelin                                                                               |
| P2ry2    | 0.50                       | -0.99 | 5.0E-02 | 5.0E-04 | 18442  | purinergic receptor P2Y, G-protein coupled 2                                           |
| Pacsin1  | 1.90                       | 0.93  | 6.7E-02 | 7.8E-04 | 23969  | protein kinase C and casein kinase substrate in neurons 1                              |
| Pdelc    | 0.46                       | -1.12 | 5.2E-02 | 5.4E-04 | 18575  | phosphodiesterase 1C                                                                   |
| Pdk2     | 0.63                       | -0.67 | 3.1E-04 | 7.5E-07 | 18604  | pyruvate dehydrogenase kinase, isoenzyme 2                                             |
| Perm1    | 0.49                       | -1.03 | 1.1E-06 | 9.7E-10 | 74183  | PPARGC1 and ESRR induced regulator, muscle 1                                           |
| Pgap1    | 1.53                       | 0.61  | 2.4E-02 | 1.7E-04 | 241062 | post-GPI attachment to proteins 1                                                      |
| Pgm2     | 0.62                       | -0.70 | 2.1E-04 | 4.5E-07 | 72157  | phosphoglucomutase 2                                                                   |
| Phkg1    | 0.43                       | -1.22 | 1.6E-03 | 5.4E-06 | 18682  | phosphorylase kinase gamma 1                                                           |
| Pitpnc1  | 0.65                       | -0.63 | 2.0E-03 | 7.3E-06 | 71795  | phosphatidylinositol transfer protein, cytoplasmic 1                                   |
| Pla2g16  | 0.56                       | -0.83 | 2.6E-05 | 3.4E-08 | 225845 | phospholipase A2, group XVI                                                            |
| Pled4    | 0.19                       | -2.42 | 5.8E-11 | 1.1E-14 | 18802  | phospholipase C, delta 4                                                               |
| Plin4    | 0.24                       | -2.08 | 3.1E-08 | 2.2E-11 | 57435  | perilipin 4                                                                            |
| Plin5    | 0.40                       | -1.34 | 4.2E-03 | 1.6E-05 | 66968  | perilipin 5                                                                            |
| Pm20d2   | 0.56                       | -0.84 | 1.1E-02 | 5.7E-05 | 242377 | peptidase M20 domain containing 2                                                      |
| Pmaip1   | 3.76                       | 1.91  | 5.6E-10 | 1.8E-13 | 58801  | phorbol-12-myristate-13-acetate-induced protein 1                                      |
| Ppara    | 0.57                       | -0.82 | 3.7E-05 | 5.2E-08 | 19013  | peroxisome proliferator activated receptor alpha                                       |
| Pparge1a | 0.63                       | -0.67 | 5.9E-02 | 6.6E-07 | 19017  | peroxisome proliferator activated receptor, gamma, coactivator 1 alpha                 |
| Ppp1r12b | 0.62                       | -0.69 | 1.3E-04 | 2.6E-07 | 329251 | protein phosphatase 1, regulatory (inhibitor) subunit 12B                              |
| Ppp1r14b | 1.65                       | 0.72  | 2.9E-04 | 7.2E-07 | 18938  | protein phosphatase 1, regulatory (inhibitor) subunit 14B                              |
| Ppp1r14c | 0.60                       | -0.75 | 1.5E-04 | 2.9E-07 | 76142  | protein phosphatase 1, regulatory (inhibitor) subunit 14c                              |
| Ppp1r1a  | 0.47                       | -1.08 | 7.7E-03 | 3.6E-05 | 58200  | protein phosphatase 1, regulatory (inhibitor) subunit 1A                               |
| Ppp1r3a  | 0.59                       | -0.75 | 4.8E-03 | 1.9E-05 | 140491 | protein phosphatase 1, regulatory (inhibitor) subunit 3A                               |
| Prune2   | 2.56                       | 1.36  | 2.1E-15 | 6.8E-20 | 353211 | prune homolog 2                                                                        |
| Pvalb    | 0.34                       | -1.56 | 1.9E-02 | 1.2E-04 | 19293  | parvalbumin                                                                            |
| Pygm     | 0.60                       | -0.74 | 1.6E-04 | 3.2E-07 | 19309  | muscle glycogen phosphorylase                                                          |
| Rap1gap2 | 1.66                       | 0.73  | 1.2E-03 | 3.6E-06 | 380711 | RAP1 GTPase activating protein 2                                                       |
| Rassf4   | 0.66                       | -0.59 | 7.7E-03 | 3.6E-05 | 213391 | Ras association (RalGDS/AF-6) domain family member 4                                   |
| Rilp     | 0.49                       | -1.04 | 7.4E-02 | 8.8E-04 | 280408 | Rab interacting lysosomal protein                                                      |
| Rpl3l    | 0.25                       | -2.02 | 6.7E-05 | 1.2E-07 | 66211  | ribosomal protein L3-like                                                              |
| Runx1    | 1.66                       | 0.73  | 7.6E-02 | 9.3E-04 | 12394  | runt related transcription factor 1                                                    |
| Ryr3     | 0.60                       | -0.74 | 2.7E-04 | 6.5E-07 | 20192  | ryanodine receptor 3                                                                   |
| Scn4b    | 2.02                       | 1.02  | 1.2E-04 | 2.1E-07 | 399548 | sodium channel, type IV, beta                                                          |
| Sema3e   | 2.10                       | 1.07  | 1.5E-02 | 9.2E-05 | 20349  | sema domain, immunoglobulin domain (Ig), short basic domain, secreted, (semaphorin) 3E |
| Sema6b   | 1.59                       | 0.67  | 6.3E-03 | 2.9E-05 | 20359  | sema domain, transmembrane domain (TM), and cytoplasmic domain, (semaphorin) 6B        |
| Slc25a34 | 0.39                       | -1.37 | 6.2E-04 | 1.9E-06 | 384071 | solute carrier family 25, member 34                                                    |
| Slc2a4   | 0.64                       | -0.65 | 6.0E-04 | 1.8E-06 | 20528  | solute carrier family 2 (facilitated glucose transporter), member 4                    |
| Slc41a1  | 0.63                       | -0.67 | 1.6E-04 | 3.3E-07 | 98396  | solute carrier family 41, member 1                                                     |
| Slc43a2  | 1.63                       | 0.71  | 1.4E-02 | 7.8E-05 | 215113 | solute carrier family 43, member 2                                                     |
| Snap91   | 1.92                       | 0.94  | 6.0E-03 | 2.6E-05 | 20616  | synaptosomal-associated protein 91                                                     |
| Sox11    | 1.54                       | 0.62  | 6.8E-03 | 3.1E-05 | 20666  | SRY-box containing gene 11                                                             |
| Spg21    | 2.17                       | 1.12  | 1.0E-09 | 3.9E-13 | 27965  | spastic paraplegia 21 homolog                                                          |
| Spin1    | see Supplementary Table 1e |       |         |         | 20729  | spindlin 1                                                                             |
| Ston2    | 0.64                       | -0.64 | 1.4E-03 | 4.5E-06 | 108800 | stonin 2                                                                               |
| Syp12    | 0.60                       | -0.73 | 5.6E-05 | 9.1E-08 | 17306  | synaptophysin-like 2                                                                   |
| Tcea3    | 0.59                       | -0.76 | 5.0E-03 | 2.1E-05 | 21401  | transcription elongation factor A (SII), 3                                             |
| Tcea5    | 0.59                       | -0.77 | 8.3E-03 | 4.0E-05 | 331532 | transcription elongation factor A (SII)-like 5                                         |
| Tenm4    | 0.60                       | -0.74 | 1.1E-03 | 3.4E-06 | 23966  | teneurin transmembrane protein 4                                                       |
| Tmem233  | 0.38                       | -1.39 | 9.4E-03 | 4.6E-05 | 545798 | transmembrane protein 233                                                              |
| Tmem52   | 0.22                       | -2.22 | 2.1E-08 | 1.1E-11 | 69671  | transmembrane protein 52                                                               |
| Tmem72   | 0.23                       | -2.12 | 2.1E-04 | 4.4E-07 | 319776 | transmembrane protein 72                                                               |
| Tmod4    | 0.63                       | -0.66 | 2.4E-02 | 1.6E-04 | 50874  | tropomodulin 4                                                                         |
| Tnmd     | 1.86                       | 0.89  | 7.7E-02 | 9.4E-04 | 64103  | tenomodulin                                                                            |
| Tnnc1    | 1.75                       | 0.81  | 4.6E-03 | 1.8E-05 | 21924  | troponin C, cardiac/slow skeletal                                                      |
| Tnni2    | 0.65                       | -0.61 | 2.6E-02 | 1.8E-04 | 21953  | troponin I, skeletal, fast 2                                                           |
| Tnnt2    | 1.54                       | 0.62  | 2.4E-02 | 1.7E-04 | 21956  | troponin T2, cardiac                                                                   |
| Tnnt3    | 0.66                       | -0.60 | 3.0E-02 | 2.3E-04 | 21957  | troponin T3, skeletal, fast                                                            |
| Trdn     | 0.65                       | -0.61 | 4.3E-02 | 4.2E-04 | 76757  | triadin                                                                                |
| Trem2    | 3.13                       | 1.64  | 4.3E-04 | 1.2E-06 | 83433  | triggering receptor expressed on myeloid cells 2                                       |
| Tst      | 0.31                       | -1.69 | 5.8E-04 | 1.7E-06 | 22117  | thiosulfate sulfurtransferase, mitochondrial                                           |
| Vgll2    | 1.52                       | 0.60  | 3.4E-02 | 2.9E-04 | 215031 | vestigial like 2 homolog                                                               |
| Wnk2     | 0.57                       | -0.80 | 1.5E-03 | 4.9E-06 | 75607  | WNK lysine deficient protein kinase 2                                                  |
| Wnt4     | 0.45                       | -1.14 | 5.7E-05 | 9.6E-08 | 22417  | wingless-related MMTV integration site 4                                               |

upregulated (red)  
downregulated (blue)

Supplementary Table 1c: Genes differentially expressed in SKM of control mice at E16.5 compared to E15.5.

| Gene symbol   | FC (E16.5 vs. E15.5) | logFC (E16.5 vs. E15.5) | FDR      | p-value  | Entrez gene | Protein name                                                                                   |
|---------------|----------------------|-------------------------|----------|----------|-------------|------------------------------------------------------------------------------------------------|
| 0610009L18Rik | 2.79                 | 1.48                    | 2.7E-06  | 1.3E-07  | 66838       | RIKEN cDNA 0610009L18 gene                                                                     |
| 0610038B21Rik | 1.76                 | 0.82                    | 4.0E-03  | 4.7E-04  | 70345       | RIKEN cDNA 0610038B21 gene                                                                     |
| 0610040F04Rik | 1.94                 | 0.96                    | 4.4E-04  | 3.7E-05  | 75394       | RIKEN cDNA 0610040F04 gene                                                                     |
| 1110001J03Rik | 1.94                 | 0.95                    | 1.0E-04  | 7.1E-06  | 66117       | RIKEN cDNA 1110001J03 gene                                                                     |
| 1110007C09Rik | 1.84                 | 0.88                    | 7.3E-06  | 3.9E-07  | 68480       | RIKEN cDNA 1110007C09 gene                                                                     |
| 111008P14Rik  | 1.87                 | 0.90                    | 1.8E-05  | 1.1E-06  | 73737       | RIKEN cDNA 111008P14 gene                                                                      |
| 1110054M8Rik  | 1.95                 | 0.96                    | 2.1E-04  | 1.6E-05  | 68841       | RIKEN cDNA 1110054M08 gene                                                                     |
| 1110058L19Rik | 1.52                 | 0.61                    | 6.4E-03  | 8.4E-04  | 68002       | RIKEN cDNA 1110058L19 gene                                                                     |
| 1500011K16Rik | 1.64                 | 0.71                    | 5.3E-03  | 6.7E-04  | 67885       | RIKEN cDNA 1500011K16 gene                                                                     |
| 1500017E21Rik | 2.66                 | 1.41                    | 1.1E-11  | 2.5E-13  | 668215      | RIKEN cDNA 1500017E21 gene                                                                     |
| 1700001G11Rik | 1.85                 | 0.89                    | 2.7E-03  | 3.0E-04  | 69303       | RIKEN cDNA 1700001G11 gene                                                                     |
| 1700021F05Rik | 1.78                 | 0.83                    | 3.3E-05  | 2.0E-06  | 67851       | RIKEN cDNA 1700021F05 gene                                                                     |
| 1700094J05Rik | 1.76                 | 0.81                    | 2.0E-03  | 2.1E-04  | 67523       | RIKEN cDNA 1700094J05 gene                                                                     |
| 1700095B10Rik | 3.54                 | 1.82                    | 1.6E-13  | 3.0E-15  | 67360       | RIKEN cDNA 1700095B10 gene                                                                     |
| 1700113A16Rik | 1.74                 | 0.80                    | 6.0E-05  | 4.1E-06  | 76642       | RIKEN cDNA 1700113A16 gene                                                                     |
| 1810011O10Rik | 1.59                 | 0.67                    | 1.6E-04  | 1.2E-05  | 69068       | RIKEN cDNA 1810011O10 gene                                                                     |
| 1810041L15Rik | 1.68                 | 0.75                    | 4.4E-05  | 2.8E-06  | 72301       | RIKEN cDNA 1810041L15 gene                                                                     |
| 2010107E04Rik | 1.98                 | 0.98                    | 2.0E-10  | 5.3E-12  | 70257       | RIKEN cDNA 2010107E04 gene                                                                     |
| 2010107G23Rik | 0.23                 | -2.12                   | 6.9E-08  | 2.6E-09  | 69894       | RIKEN cDNA 2010107G23 gene                                                                     |
| 2010300C28Rik | 0.23                 | -0.88                   | 4.5E-03  | 5.6E-04  | 72097       | RIKEN cDNA 2010300C02 gene                                                                     |
| 230002M23Rik  | 0.00                 | -8.38                   | 2.0E-47  | 1.8E-50  | 69542       | RIKEN cDNA 230002M23 gene                                                                      |
| 2310002L09Rik | 3.48                 | 1.80                    | 9.2E-20  | 8.5E-22  | 71886       | RIKEN cDNA 2310002L09 gene                                                                     |
| 2310007B03Rik | 0.14                 | -2.87                   | 1.7E-03  | 1.8E-04  | 71874       | RIKEN cDNA 2310007B03 gene                                                                     |
| 2310015B20Rik | 1.79                 | 0.84                    | 5.3E-04  | 4.6E-05  | 69563       | RIKEN cDNA 2310015B20 gene                                                                     |
| 2310022A10Rik | 1.88                 | 0.91                    | 3.4E-11  | 8.0E-13  | 66367       | RIKEN cDNA 2310022A10 gene                                                                     |
| 2310034C09Rik | 0.00                 | -11.35                  | 6.6E-211 | 2.2E-215 | 117172      | RIKEN cDNA 2310034C09 gene                                                                     |
| 2310040G24Rik | 4.88                 | 2.29                    | 7.7E-13  | 1.5E-14  | 381792      | RIKEN cDNA 2310040G24 gene                                                                     |
| 2310043L19Rik | 2.77                 | 1.47                    | 5.1E-07  | 2.2E-08  | 75589       | RIKEN cDNA 2310043L19 gene                                                                     |
| 2310057N15Rik | 0.00                 | -8.15                   | 1.5E-22  | 1.1E-24  | 69696       | RIKEN cDNA 2310057N15 gene                                                                     |
| 2310061H04Rik | 2.24                 | 1.16                    | 2.1E-10  | 5.6E-12  | 69662       | RIKEN cDNA 2310061H04 gene                                                                     |
| 2410002F23Rik | 0.64                 | -0.64                   | 6.9E-06  | 3.7E-07  | 668661      | RIKEN cDNA 2410002F23 gene                                                                     |
| 241001606Rik  | 0.61                 | -0.71                   | 1.1E-03  | 1.0E-04  | 71952       | RIKEN cDNA 241001606 gene                                                                      |
| 2610035D17Rik | 0.56                 | -0.83                   | 4.6E-03  | 5.7E-04  | 72386       | RIKEN cDNA 2610035D17 gene                                                                     |
| 2610318N02Rik | 0.44                 | -1.19                   | 3.1E-04  | 7.0E-05  | 70458       | RIKEN cDNA 2610318N02 gene                                                                     |
| 2700038G22Rik | 0.55                 | -0.87                   | 5.4E-03  | 6.8E-04  | 67194       | RIKEN cDNA 2700038G22 gene                                                                     |
| 3110057O12Rik | 3.61                 | 1.85                    | 2.6E-14  | 4.2E-16  | 269423      | RIKEN cDNA 3110057O12 gene                                                                     |
| 3425401B19Rik | 2.76                 | 1.47                    | 2.7E-14  | 4.4E-16  | 100504518   | RIKEN cDNA 3425401B19 gene                                                                     |
| 4430402I18Rik | 4.66                 | 2.22                    | 1.3E-09  | 3.8E-11  | 381218      | RIKEN cDNA 4430402I18 gene                                                                     |
| 4632428N05Rik | 1.53                 | 0.62                    | 3.5E-05  | 2.2E-06  | 74048       | RIKEN cDNA 4632428N05 gene                                                                     |
| 4833403I15Rik | 2.58                 | 1.37                    | 2.1E-10  | 5.7E-12  | 74574       | RIKEN cDNA 4833403I15 gene                                                                     |
| 4833412C05Rik | 2.69                 | 1.43                    | 3.2E-05  | 2.0E-06  | 73904       | RIKEN cDNA 4833412C05 gene                                                                     |
| 4930412C18Rik | 0.43                 | -1.23                   | 5.2E-03  | 6.6E-04  | 320152      | RIKEN cDNA 4930412C18 gene                                                                     |
| 4930427A07Rik | 0.56                 | -0.83                   | 8.5E-05  | 6.0E-06  | 104732      | RIKEN cDNA 4930427A07 gene                                                                     |
| 4930429F24Rik | 2.42                 | 1.28                    | 1.4E-07  | 5.5E-09  | 74633       | RIKEN cDNA 4930429F24 gene                                                                     |
| 5330439B14Rik | 2.00                 | 1.00                    | 3.1E-04  | 2.5E-05  | 321015      | RIKEN cDNA 5330439B14 gene                                                                     |
| 5430416N02Rik | 0.61                 | -0.71                   | 7.4E-03  | 1.0E-03  | 100503199   | RIKEN cDNA 5430416N02 gene                                                                     |
| 5730508B09Rik | 1.60                 | 0.68                    | 5.2E-03  | 6.5E-04  | 70617       | RIKEN cDNA 5730508B09 gene                                                                     |
| 5930412G12Rik | 2.09                 | 1.06                    | 1.2E-07  | 4.6E-09  | 319616      | RIKEN cDNA 5930412G12 gene                                                                     |
| 6030419C18Rik | 0.62                 | -0.70                   | 1.8E-03  | 1.9E-04  | 319477      | RIKEN cDNA 6030419C18 gene                                                                     |
| 6330410L21Rik | 4.95                 | 2.31                    | 9.8E-13  | 2.0E-14  | 319224      | RIKEN cDNA 6330410L21 gene                                                                     |
| 6430411K18Rik | 2.72                 | 1.44                    | 2.1E-19  | 2.0E-21  | 76880       | RIKEN cDNA 6430411K18 gene                                                                     |
| 6430571L13Rik | 8.59                 | 3.10                    | 2.0E-23  | 1.4E-25  | 235599      | RIKEN cDNA 6430571L13 gene                                                                     |
| 8430408G22Rik | 4.44                 | 2.15                    | 5.4E-27  | 2.7E-29  | 213393      | RIKEN cDNA 8430408G22 gene                                                                     |
| 8430419L09Rik | 0.65                 | -0.61                   | 1.4E-04  | 1.0E-05  | 74525       | RIKEN cDNA 8430419L09 gene                                                                     |
| 9330182L06Rik | 0.55                 | -0.86                   | 2.5E-03  | 2.7E-04  | 231014      | RIKEN cDNA 9330182L06 gene                                                                     |
| 9430015G10Rik | 0.61                 | -0.71                   | 2.1E-04  | 1.6E-05  | 230996      | RIKEN cDNA 9430015G10 gene                                                                     |
| A230070E04Rik | 0.27                 | -1.90                   | 4.6E-08  | 1.7E-09  | 100043072   | RIKEN cDNA A230070E04 gene                                                                     |
| A2m           | 0.44                 | -1.18                   | 1.2E-04  | 8.9E-06  | 232345      | alpha-2-macroglobulin                                                                          |
| A63001902Rik  | 7.97                 | 3.00                    | 8.6E-19  | 8.9E-21  | 408254      | uncharacterized LOC408254                                                                      |
| A930003A15Rik | 2.62                 | 1.39                    | 1.3E-05  | 7.1E-07  | 68162       | RIKEN cDNA A930003A15 gene                                                                     |
| A930016O22Rik | 0.61                 | -2.79                   | 7.7E-35  | 1.6E-37  | 100503495   | RIKEN cDNA A930016O22 gene                                                                     |
| A.A986860     | 0.30                 | -1.73                   | 1.8E-05  | 1.0E-06  | 1024239     | expressed sequence A.A986860                                                                   |
| Aacs          | 0.96                 | -0.59                   | 1.6E-03  | 1.7E-04  | 223924      | achalasia, adrenocortical insufficiency, alacrimia                                             |
| Aacs          | 0.56                 | -0.83                   | 5.4E-07  | 2.3E-08  | 78894       | acetyl-CoA synthetase                                                                          |
| Aamdc         | 1.85                 | 0.89                    | 6.4E-07  | 2.8E-08  | 66273       | adipogenesis associated Mth938 domain containing                                               |
| Atk           | 1.61                 | 0.68                    | 4.4E-04  | 3.7E-05  | 11302       | apoptosis-associated tyrosine kinase                                                           |
| Abca8a        | 1.98                 | 0.99                    | 9.7E-10  | 2.7E-11  | 217258      | ATP-binding cassette, sub-family A (ABC1), member 8a                                           |
| Abcc9         | 2.14                 | 1.10                    | 1.2E-11  | 2.8E-13  | 20928       | ATP-binding cassette, sub-family C (CFTR/MRP), member 9                                        |
| Abcd2         | 3.16                 | 1.66                    | 8.5E-07  | 3.8E-08  | 26874       | ATP-binding cassette, sub-family D (ALD), member 2                                             |
| Abcg4         | 0.51                 | -0.97                   | 5.2E-03  | 6.5E-04  | 192663      | ATP-binding cassette, sub-family G (WHITE), member 4                                           |
| Abhd6         | 0.49                 | -1.02                   | 1.3E-03  | 1.3E-04  | 66082       | abhydrolase domain containing 6                                                                |
| Abhim1        | 0.63                 | -0.66                   | 5.0E-03  | 6.2E-04  | 226251      | actin-binding LIM protein 1                                                                    |
| Abhim2        | 2.59                 | 1.37                    | 3.4E-11  | 8.1E-13  | 231148      | actin-binding LIM protein 2                                                                    |
| Abra          | 2.27                 | 1.18                    | 1.6E-06  | 7.6E-08  | 225313      | actin-binding Rho activating protein                                                           |
| Acaa2         | 2.73                 | 1.45                    | 3.3E-24  | 2.2E-26  | 52538       | acetyl-Coenzyme A acyltransferase 2 (mitochondrial 3-oxoacetyl-Coenzyme A thiolase)            |
| Acaeb         | 6.04                 | 2.59                    | 4.8E-51  | 2.6E-54  | 1007095     | acetyl-Coenzyme A carboxylase beta                                                             |
| Acad12        | 1.76                 | 0.82                    | 4.0E-03  | 4.8E-04  | 338359      | acetyl-Coenzyme A dehydrogenase family, member 12                                              |
| Acadfl        | 3.27                 | 1.71                    | 1.5E-31  | 5.1E-34  | 11363       | acetyl-Coenzyme A dehydrogenase, long-chain                                                    |
| Acadm         | 3.03                 | 1.60                    | 3.1E-29  | 1.3E-31  | 11364       | acetyl-Coenzyme A dehydrogenase, medium chain                                                  |
| Acads         | 2.05                 | 1.04                    | 1.4E-12  | 2.8E-14  | 11409       | acetyl-Coenzyme A dehydrogenase, short chain                                                   |
| Acadv1        | 2.34                 | 1.23                    | 7.1E-17  | 8.9E-19  | 11370       | acetyl-Coenzyme A dehydrogenase, very long chain                                               |
| Acat2         | 0.65                 | -0.61                   | 4.6E-03  | 5.6E-04  | 110460      | acetyl-Coenzyme A acetyltransferase 2                                                          |
| Ace           | 3.09                 | 1.63                    | 7.7E-12  | 1.7E-13  | 11421       | angiotensin I converting enzyme (peptidyl-dipeptidase A) 1                                     |
| Acer2         | 1.92                 | 0.94                    | 5.6E-04  | 4.9E-05  | 230379      | alkaline ceramidase 2                                                                          |
| Ache          | 1.54                 | 0.62                    | 2.1E-03  | 2.2E-04  | 11423       | acetylcholinesterase                                                                           |
| Acly          | 0.50                 | -0.99                   | 2.1E-08  | 7.0E-10  | 104112      | ATP citrate lyase                                                                              |
| Aco2          | 2.75                 | 1.46                    | 1.6E-23  | 1.1E-25  | 11429       | aconitase 2, mitochondrial                                                                     |
| Acot1         | 0.45                 | -1.16                   | 7.8E-04  | 7.2E-05  | 26897       | acyl-CoA thioesterase 1                                                                        |
| Acot11        | 2.40                 | 1.26                    | 2.9E-17  | 3.4E-19  | 329910      | acyl-CoA thioesterase 11                                                                       |
| Acot13        | 2.01                 | 1.00                    | 2.1E-07  | 8.5E-09  | 66834       | acyl-CoA thioesterase 13                                                                       |
| Acsl1         | 1.94                 | 0.76                    | 6.9E-03  | 9.1E-04  | 14081       | acyl-CoA synthetase long-chain family member 1                                                 |
| Acsl5         | 0.65                 | -0.62                   | 2.7E-04  | 2.1E-05  | 433256      | acyl-CoA synthetase long-chain family member 5                                                 |
| Acsl6         | 2.31                 | 1.21                    | 7.4E-05  | 5.1E-06  | 216739      | acyl-CoA synthetase long-chain family member 6                                                 |
| Acss1         | 1.94                 | 0.96                    | 1.1E-06  | 5.2E-08  | 68738       | acyl-CoA synthetase short-chain family member 1                                                |
| Acss2         | 2.87                 | 1.52                    | 2.0E-25  | 1.3E-27  | 60525       | acyl-CoA synthetase short-chain family member 2                                                |
| Acss2os       | 2.79                 | 1.48                    | 4.5E-07  | 1.9E-08  | 74945       | acyl-CoA synthetase short-chain family member 2, opposite strand                               |
| Acta1         | 5.31                 | 2.41                    | 3.3E-31  | 1.1E-33  | 11459       | actin, alpha 1, skeletal muscle                                                                |
| Actc1         | 2.80                 | 1.49                    | 4.1E-16  | 5.4E-18  | 11464       | actin, alpha, cardiac muscle 1                                                                 |
| Actg2         | 2.71                 | 1.44                    | 2.0E-09  | 5.8E-11  | 11468       | actin, gamma 2, smooth muscle, enteric                                                         |
| Actn2         | 2.96                 | 1.56                    | 6.5E-17  | 8.0E-19  | 11472       | actinin alpha 2                                                                                |
| Actn3         | 6.47                 | 2.69                    | 8.6E-36  | 1.4E-38  | 11474       | actinin alpha 3                                                                                |
| Acyp2         | 2.53                 | 1.34                    | 1.8E-06  | 8.6E-08  | 78572       | acylphosphatase 2, muscle type                                                                 |
| Adams17       | 0.61                 | -0.71                   | 5.1E-06  | 2.7E-07  | 233332      | a disintegrin-like and metalloprotease (reprolysins type) with thrombospondin type 1 motif, 17 |
| Adams3        | 0.62                 | -0.70                   | 6.9E-03  | 9.2E-04  | 330119      | a disintegrin-like and metalloprotease (reprolysins type) with thrombospondin type 1 motif, 3  |
| Adams4        | 1.94                 | 0.96                    | 6.4E-08  | 2.4E-09  | 225955      | ADAMTS-like 4                                                                                  |
| Adck3         | 7.55                 | 2.92                    | 1.6E-48  | 1.2E-51  | 67426       | aaUF domain containing kinase 3                                                                |
| Adcy2         | 1.88                 | 0.97                    | 3.1E-11  | 7.4E-13  | 210044      | adenylate cyclase 2                                                                            |
| Adcy9         | 1.83                 | 0.81                    | 1.2E-05  | 6.5E-07  | 11515       | adenylate cyclase 9                                                                            |
| Adhfe1        | 7.38                 | 2.88                    | 1.1E-08  | 3.4E-10  | 76187       | alcohol dehydrogenase, iron containing, 1                                                      |
| Adm           | 1.86                 | 0.90                    | 1.6E-03  | 1.6E-04  | 11535       | adrenomedullin                                                                                 |
| Adora2a       | 1.74                 | 0.80                    | 1.8E-03  | 1.8E-04  | 11540       | adenosine A2a receptor                                                                         |
| Adprhl1       | 3.30                 | 1.72                    | 7.3E-14  | 1.3E-15  | 234072      | ADP-ribosylhydrolase like 1                                                                    |
| Adra2b        | 3.00                 | 1.58                    | 1.8E-06  | 8.6E-08  | 11552       | adrenergic receptor, alpha 2b                                                                  |
| Adrb2         | 1.95                 | 0.96                    | 2.0E-04  | 1.5E-05  | 11555       | adrenergic receptor, beta 2                                                                    |
| Adss1         | 3.38                 | 1.76                    | 4.0E-23  | 2.9E-25  | 11565       | adenylsuccinate synthetase like 1                                                              |
| AF357359      | 2.06                 | 1.04                    | 5.3E-06  | 2.8E-07  | 100303647   | snoRNA AF357359                                                                                |
| Afap111       | 1.91                 | 0.93                    | 2.4E-08  | 8.3E-10  | 106877      | actin filament associated protein 1-like 1                                                     |
| Afl1          | 2.19                 | 1.13                    | 4.3E-15  | 6.5E-17  | 17355       | AF4/FMR2 family, member 1                                                                      |
| Afl2          | 0.51                 | -0.98                   | 1.0E-03  | 9.5E-05  | 14266       | AF4/FMR2 family, member 2                                                                      |
| Agbl1         | 2.96                 | 1.56                    | 1.7E-05  | 9.6E-07  | 244071      | ATP/GTP binding protein-like 1                                                                 |
| Agbl5         | 0.63                 | -0.67                   | 5.2E-03  | 6.5E-04  | 231093      | ATP/GTP binding protein-like 5                                                                 |
| Agf           | 3.29                 | 1.72                    | 1.2E-19  | 1.1E-21  | 77559       | amylol-1,6-glucosidase, 4-alpha-glucanotransferase                                             |
| Ago2          | 1.84                 | 0.88                    | 2.8E-06  | 1.4E-07  | 239528      | argonate RISC catalytic subunit 2                                                              |
| Agpat9        | 5.23                 | 2.39                    | 1.0E-09  | 2.8E-11  | 231510      | 1-acylglycerol-3-phosphate O-acyltransferase 9                                                 |
| Agt           | 9.07                 | 3.18                    | 8.9E-28  | 4.3E-30  | 11606       | angiotensinogen (serpin peptidase inhibitor, clade A, member 8)                                |
| Agtr1a        | 1.55                 | 0.63                    | 3.1E-03  | 3.5E-04  | 11607       | angiotensin II receptor, type 1a                                                               |
| AI464131      | 3.19                 | 1.67                    | 2.5E-26  | 1.4E-28  | 329828      | expressed sequence AI464131                                                                    |
| Aifm2         | 1.78                 | 0.83                    | 2.3E-03  | 2.5E-04  | 71361       | apoptosis-inducing factor, mitochondrion-associated 2                                          |

|               |       |       |         |         |        |                                                                                 |
|---------------|-------|-------|---------|---------|--------|---------------------------------------------------------------------------------|
| Aifm3         | 1.91  | 0.93  | 4.3E-03 | 5.2E-04 | 72168  | apoptosis-inducing factor, mitochondrion-associated 3                           |
| Akl1          | 3.53  | 1.82  | 1.4E-25 | 8.7E-28 | 11636  | adenylate kinase 1                                                              |
| Akap1         | 2.69  | 1.43  | 1.9E-23 | 1.4E-25 | 11640  | A kinase (PRKA) anchor protein 1                                                |
| Akap6         | 1.76  | 0.82  | 3.4E-05 | 2.1E-06 | 238161 | A kinase (PRKA) anchor protein 6                                                |
| Akap7         | 1.74  | 0.80  | 8.6E-05 | 6.0E-06 | 432442 | A kinase (PRKA) anchor protein 7                                                |
| Akr1b10       | 1.94  | 0.96  | 5.0E-05 | 3.3E-06 | 67861  | aldo-keto reductase family 1, member B10 (aldose reductase)                     |
| Akr1e14       | 2.29  | 1.19  | 3.5E-03 | 4.1E-04 | 105387 | aldo-keto reductase family 1, member C14                                        |
| Alas1         | 1.85  | 0.89  | 2.3E-09 | 7.0E-11 | 11655  | aminolevulinic acid synthase 1                                                  |
| Alcam         | 0.50  | -1.00 | 3.7E-09 | 1.1E-10 | 11658  | activated leukocyte cell adhesion molecule                                      |
| Aldh1a2       | 1.52  | 0.60  | 6.6E-03 | 8.8E-04 | 19378  | aldehyde dehydrogenase family 1, subfamily A2                                   |
| Aldh1a7       | 0.29  | -1.79 | 2.5E-03 | 2.8E-04 | 26358  | aldehyde dehydrogenase family 1, subfamily A7                                   |
| Aldh1l2       | 1.64  | 0.72  | 1.4E-05 | 8.1E-07 | 216188 | aldehyde dehydrogenase 1 family, member L2                                      |
| Aldh4a1       | 2.27  | 1.18  | 1.3E-17 | 1.5E-19 | 212647 | aldehyde dehydrogenase 4 family, member A1                                      |
| Aldh6a1       | 1.82  | 0.86  | 7.9E-05 | 5.5E-06 | 104776 | aldehyde dehydrogenase family 6, subfamily A1                                   |
| Aldoa         | 3.34  | 1.74  | 3.3E-31 | 1.1E-33 | 11674  | aldolase A, fructose-bisphosphate                                               |
| Aldoat1       | 3.51  | 1.81  | 7.5E-34 | 1.8E-36 | 353204 | aldolase 1 A retrogene 1                                                        |
| Alkbh3        | 1.67  | 0.74  | 2.1E-05 | 1.3E-06 | 69113  | alkB, alkylation repair homolog 3                                               |
| Alox12        | 0.39  | -1.38 | 1.4E-03 | 1.4E-04 | 11684  | arachidonate 12-lipoxygenase                                                    |
| Alpk2         | 1.66  | 0.73  | 1.4E-03 | 1.3E-04 | 225638 | alpha-kinase 2                                                                  |
| Alpk3         | 2.26  | 1.17  | 1.2E-10 | 3.1E-12 | 116904 | alpha-kinase 3                                                                  |
| Amigo1        | 1.88  | 0.91  | 1.4E-11 | 3.2E-13 | 229715 | adhesion molecule with Ig like domain 1                                         |
| Amom1         | 1.99  | 0.99  | 7.0E-11 | 1.7E-12 | 75723  | angomycin-like 1                                                                |
| Ampd1         | 4.69  | 2.23  | 5.3E-28 | 2.5E-30 | 229665 | adenosine monophosphate deaminase 1                                             |
| Amtn          | 0.24  | -2.06 | 7.0E-10 | 1.9E-11 | 71421  | amelotin                                                                        |
| Angptl2       | 1.67  | 0.74  | 1.6E-06 | 7.4E-08 | 26360  | angiopoietin-like 2                                                             |
| Ank1          | 2.95  | 1.56  | 1.2E-19 | 1.2E-21 | 11733  | ankyrin 1, erythroid                                                            |
| Ank3          | 2.03  | 1.02  | 2.0E-15 | 2.9E-17 | 11735  | ankyrin 3, epithelial                                                           |
| Ankrd13d      | 0.40  | -1.30 | 1.8E-06 | 8.3E-08 | 68423  | ankyrin repeat domain 13 family, member D                                       |
| Ankrd2        | 2.33  | 1.22  | 6.5E-04 | 5.8E-05 | 56642  | ankyrin repeat domain 2 (stretch responsive muscle)                             |
| Ankrd23       | 2.25  | 1.17  | 7.1E-11 | 1.8E-12 | 78321  | ankyrin repeat domain 23                                                        |
| Ankrd33b      | 2.21  | 1.15  | 1.6E-05 | 9.1E-07 | 67434  | ankyrin repeat domain 33B                                                       |
| Ankrd37       | 3.21  | 1.68  | 2.1E-11 | 4.9E-13 | 654824 | ankyrin repeat domain 37                                                        |
| Ankrd40       | 1.64  | 0.72  | 2.6E-07 | 1.0E-08 | 71452  | ankyrin repeat domain 40                                                        |
| Ankrd9        | 3.68  | 1.88  | 2.3E-24 | 1.6E-26 | 74251  | ankyrin repeat domain 9                                                         |
| Anxa1         | 0.33  | -1.60 | 1.9E-17 | 2.3E-19 | 16952  | annexin A1                                                                      |
| Anxa11        | 2.18  | 1.12  | 1.2E-12 | 2.5E-14 | 11744  | annexin A11                                                                     |
| Anxa8         | 0.28  | -3.83 | 9.6E-05 | 6.8E-06 | 11752  | annexin A8                                                                      |
| Anx3          | 3.09  | 1.63  | 1.4E-18 | 1.5E-20 | 11754  | amine oxidase, copper containing 3                                              |
| Aox1          | 2.65  | 1.41  | 2.9E-09 | 8.8E-11 | 11761  | aldehyde oxidase 1                                                              |
| Ap5s1         | 1.55  | 0.63  | 5.6E-03 | 7.2E-04 | 69596  | adaptor-related protein 5 complex, sigma 1 subunit                              |
| Apcdd1        | 0.46  | -1.11 | 4.0E-03 | 4.8E-04 | 494504 | adenomatous polyposis coli down-regulated 1                                     |
| Apid1         | 0.52  | -0.94 | 2.1E-04 | 1.6E-05 | 69928  | apoptosis-inducing, TAF9-like domain 1                                          |
| Appl1         | 0.46  | -1.11 | 4.0E-07 | 1.7E-08 | 11803  | amyloid beta (A4) precursor-like protein 1                                      |
| Apobec2       | 3.33  | 1.74  | 3.2E-20 | 2.9E-22 | 11811  | apolipoprotein B mRNA editing enzyme, catalytic polypeptide 2                   |
| Apoe          | 1.59  | 0.67  | 2.5E-05 | 1.5E-06 | 11816  | apolipoprotein E                                                                |
| Apold1        | 2.29  | 1.20  | 1.6E-06 | 7.6E-08 | 381823 | apolipoprotein L domain containing 1                                            |
| Apool         | 1.94  | 0.95  | 7.8E-09 | 2.5E-10 | 68117  | apolipoprotein O-like                                                           |
| Aqp11         | 3.27  | 1.71  | 1.4E-09 | 4.2E-11 | 66333  | aquaporin 11                                                                    |
| Aqp4          | 22.84 | 4.51  | 1.2E-19 | 1.2E-21 | 11829  | aquaporin 4                                                                     |
| Aqp7          | 9.68  | 3.28  | 1.9E-14 | 3.1E-16 | 11832  | aquaporin 7                                                                     |
| Arg1          | 0.09  | -3.54 | 9.0E-23 | 6.6E-25 | 11846  | arginase, liver                                                                 |
| Arhgap10      | 1.88  | 0.91  | 1.2E-10 | 3.2E-12 | 78514  | Rho GTPase activating protein 10                                                |
| Arhgap26      | 1.64  | 0.71  | 9.1E-06 | 5.0E-07 | 71302  | Rho GTPase activating protein 26                                                |
| Arhgap36      | 4.24  | 2.08  | 1.5E-22 | 1.1E-24 | 75404  | Rho GTPase activating protein 36                                                |
| Arhgef19      | 0.51  | -0.97 | 3.0E-06 | 1.5E-07 | 213649 | Rho guanine nucleotide exchange factor (GEF) 19                                 |
| Arhgef6       | 1.66  | 0.73  | 1.8E-05 | 1.1E-06 | 73341  | Rac/Cdc42 guanine nucleotide exchange factor (GEF) 6                            |
| Arid3a        | 0.55  | -0.86 | 5.8E-06 | 3.1E-07 | 13496  | AT rich interactive domain 3A (BRIGHT-like)                                     |
| Arl6ip5       | 1.89  | 0.92  | 6.6E-08 | 2.4E-09 | 65106  | ADP-ribosylation factor-like 6 interacting protein 5                            |
| Art1          | 2.81  | 1.49  | 5.5E-18 | 6.1E-20 | 11870  | ADP-ribosyltransferase 1                                                        |
| Art3          | 7.79  | 2.96  | 3.7E-48 | 2.9E-51 | 109979 | ADP-ribosyltransferase 3                                                        |
| Art5          | 2.67  | 1.42  | 1.8E-08 | 6.2E-10 | 11875  | ADP-ribosyltransferase 5                                                        |
| As3mt         | 1.82  | 0.86  | 4.3E-06 | 2.2E-07 | 57344  | arsenic (+3 oxidation state) methyltransferase                                  |
| Asb10         | 2.30  | 1.20  | 1.7E-05 | 9.6E-07 | 117590 | ankyrin repeat and SOCS box-containing 10                                       |
| Asb11         | 19.04 | 4.25  | 4.8E-30 | 1.9E-32 | 68854  | ankyrin repeat and SOCS box-containing 11                                       |
| Asb12         | 15.14 | 3.92  | 1.0E-28 | 4.4E-31 | 70392  | ankyrin repeat and SOCS box-containing 12                                       |
| Asb15         | 6.01  | 2.59  | 1.8E-13 | 3.3E-15 | 78910  | ankyrin repeat and SOCS box-containing 15                                       |
| Asb16         | 2.98  | 1.58  | 2.4E-10 | 6.5E-12 | 217217 | ankyrin repeat and SOCS box-containing 16                                       |
| Asb18         | 3.71  | 1.89  | 9.3E-08 | 3.5E-09 | 208372 | ankyrin repeat and SOCS box-containing 18                                       |
| Asb2          | 3.01  | 1.59  | 6.3E-17 | 7.8E-19 | 62526  | ankyrin repeat and SOCS box-containing 2                                        |
| Asb5          | 4.94  | 2.30  | 2.3E-18 | 2.5E-20 | 76294  | ankyrin repeat and SOCS box-containing 5                                        |
| Asb8          | 2.25  | 1.17  | 8.9E-16 | 1.2E-17 | 78541  | ankyrin repeat and SOCS box-containing 8                                        |
| Asns          | 1.94  | 0.96  | 2.0E-08 | 6.9E-10 | 27053  | asparagine synthetase                                                           |
| Asph          | 4.32  | 2.11  | 1.3E-37 | 2.0E-40 | 65973  | aspartate-beta-hydroxylase                                                      |
| Asphd2        | 0.56  | -0.84 | 1.7E-03 | 1.8E-04 | 72898  | aspartate beta-hydroxylase domain containing 2                                  |
| Aspn          | 1.62  | 0.70  | 3.9E-05 | 2.5E-06 | 66695  | asporin                                                                         |
| Atcay         | 3.40  | 1.76  | 7.6E-14 | 1.3E-15 | 16467  | ataxia, cerebellar, Cayman type homolog                                         |
| Atcayos       | 4.32  | 2.11  | 1.5E-19 | 1.5E-21 | 69678  | ataxia, cerebellar, Cayman type, opposite strand                                |
| Atfb6         | 0.64  | -0.65 | 8.0E-07 | 3.5E-08 | 12915  | activating transcription factor 6 beta                                          |
| Atg4a         | 1.83  | 0.87  | 1.8E-05 | 1.0E-06 | 664648 | autophagy related 4A, cysteine peptidase                                        |
| Atp1a2        | 3.86  | 1.95  | 4.1E-30 | 1.6E-32 | 98660  | ATPase, Na+/K+ transporting, alpha 2 polypeptide                                |
| Atp1b2        | 3.29  | 1.72  | 2.2E-25 | 3.8E-28 | 11932  | ATPase, Na+/K+ transporting, beta 2 polypeptide                                 |
| Atp1b4        | 5.60  | 2.49  | 7.5E-28 | 3.6E-30 | 67821  | ATPase, (Na+/K+) transporting, beta 4 polypeptide                               |
| Atp2a1        | 4.99  | 2.32  | 1.5E-32 | 4.5E-35 | 11937  | ATPase, Ca++ transporting, cardiac muscle, fast twitch 1                        |
| Atp2a3        | 1.82  | 0.87  | 1.6E-04 | 1.2E-05 | 53313  | ATPase, Ca++ transporting, ubiquitous                                           |
| Atp2b3        | 3.26  | 1.71  | 2.4E-16 | 3.1E-18 | 320707 | ATPase, Ca++ transporting, plasma membrane 3                                    |
| Atp5a1        | 1.77  | 0.82  | 4.4E-09 | 1.4E-10 | 11946  | ATP synthase, H+ transporting, mitochondrial F1 complex, alpha subunit 1        |
| Atp5b         | 1.95  | 0.96  | 1.1E-12 | 2.2E-14 | 11947  | ATP synthase, H+ transporting mitochondrial F1 complex, beta subunit            |
| Atp5c1        | 1.96  | 0.97  | 1.0E-11 | 2.3E-13 | 11949  | ATP synthase, H+ transporting, mitochondrial F1 complex, gamma polypeptide 1    |
| Atp5d         | 1.67  | 0.74  | 1.9E-07 | 7.5E-09 | 66043  | ATP synthase, H+ transporting, mitochondrial F1 complex, delta subunit          |
| Atp5e         | 1.98  | 0.99  | 6.0E-07 | 2.6E-08 | 67126  | ATP synthase, H+ transporting, mitochondrial F1 complex, epsilon subunit        |
| Atp5f1        | 1.83  | 0.87  | 6.9E-09 | 2.2E-10 | 11950  | ATP synthase, H+ transporting, mitochondrial F0 complex, subunit B1             |
| Atp5g1        | 2.35  | 1.23  | 2.9E-15 | 4.3E-17 | 11951  | ATP synthase, H+ transporting, mitochondrial F0 complex, subunit c1 (subunit 9) |
| Atp5g3        | 1.99  | 0.99  | 2.2E-10 | 5.9E-12 | 228033 | ATP synthase, H+ transporting, mitochondrial F0 complex, subunit C3 (subunit 9) |
| Atp5h         | 1.74  | 0.80  | 4.3E-04 | 2.6E-05 | 71679  | ATP synthase, H+ transporting, mitochondrial F0 complex, subunit d              |
| Atp5j         | 1.74  | 0.80  | 4.3E-04 | 2.6E-05 | 11957  | ATP synthase, H+ transporting, mitochondrial F0 complex, subunit F              |
| Atp5j2        | 1.76  | 0.81  | 1.5E-07 | 5.9E-09 | 57423  | ATP synthase, H+ transporting, mitochondrial F0 complex, subunit F2             |
| Atp5k         | 1.87  | 0.91  | 6.0E-08 | 2.2E-09 | 11958  | ATP synthase, H+ transporting, mitochondrial F1F0 complex, subunit e            |
| Atp5o         | 2.07  | 1.05  | 7.1E-11 | 1.8E-12 | 22808  | ATP synthase, H+ transporting, mitochondrial F1 complex, O subunit              |
| Atp6v02       | 1.53  | 0.62  | 6.2E-03 | 8.0E-04 | 76252  | ATPase, H+ transporting, lysosomal V0 subunit E2                                |
| Atp8a1        | 1.56  | 0.64  | 1.2E-03 | 1.2E-04 | 11980  | ATPase, aminophospholipid transporter (APLT), class I, type 8A, member 1        |
| Atraid        | 1.52  | 0.61  | 1.1E-05 | 6.1E-07 | 381629 | all-trans retinoic acid induced differentiation factor                          |
| Auh           | 2.01  | 1.01  | 3.2E-07 | 1.3E-08 | 11992  | AU RNA binding protein/enoyl-coenzyme A hydratase                               |
| AW551984      | 1.93  | 0.95  | 2.4E-08 | 8.2E-10 | 244810 | expressed sequence AW551984                                                     |
| B230118H07Rik | 1.60  | 0.68  | 1.7E-03 | 1.8E-04 | 68170  | RIKEN cDNA B230118H07 gene                                                      |
| B230119M05Rik | 2.62  | 1.39  | 1.1E-06 | 4.9E-08 | 77983  | RIKEN cDNA B230119M05 gene                                                      |
| B3gal2        | 1.82  | 0.87  | 3.0E-04 | 2.4E-05 | 26878  | UDP-Gal:beta-GlcNAc beta 1,3-galactosyltransferase, polypeptide 2               |
| B3gal3        | 2.15  | 1.10  | 2.7E-06 | 1.3E-07 | 72797  | UDP-GlcNAc:beta-Gal beta-1,3-N-acetylglicosaminyltransferase 3                  |
| B3gal7        | 0.48  | -1.06 | 1.1E-04 | 1.7E-06 | 227327 | UDP-GlcNAc:beta-Gal beta-1,3-N-acetylglicosaminyltransferase 7                  |
| B4galnt4      | 0.23  | -2.13 | 1.1E-18 | 1.2E-20 | 330671 | beta-1,4-N-acetyl-galactosaminyl transferase 4                                  |
| Bsg2          | 1.71  | 0.78  | 1.2E-05 | 6.6E-07 | 213539 | BCL2-associated atlanogen 2                                                     |
| Bai2          | 0.36  | -1.46 | 9.9E-13 | 2.0E-14 | 230775 | brain-specific angiogenesis inhibitor 2                                         |
| Baiap2        | 0.58  | -0.78 | 4.7E-04 | 4.0E-05 | 108100 | brain-specific angiogenesis inhibitor 1-associated protein 2                    |
| Bambi         | 0.58  | -0.79 | 4.8E-04 | 4.1E-05 | 68010  | BMP and activin membrane-bound inhibitor, homolog                               |
| BC002163      | 1.63  | 0.70  | 1.9E-05 | 1.1E-06 | 170658 | NADH dehydrogenase Fe-S protein 5 pseudogene                                    |
| BC022687      | 0.54  | -0.88 | 3.3E-03 | 3.8E-04 | 217887 | cDNA sequence BC022687                                                          |
| Beas3         | 1.67  | 0.74  | 4.6E-06 | 2.4E-07 | 192197 | breast carcinoma amplified sequence 3                                           |
| Behe          | 2.85  | 1.51  | 1.4E-17 | 1.6E-19 | 12038  | butyrylcholinesterase                                                           |
| Bcl11a        | 0.26  | -1.94 | 2.2E-06 | 1.0E-07 | 14025  | B cell CLL/lymphoma 11A (zinc finger protein)                                   |
| Bcl11b        | 0.30  | -1.75 | 7.1E-03 | 9.6E-04 | 58208  | B cell leukemia/lymphoma 11B                                                    |
| Bcl6          | 0.54  | -0.89 | 4.1E-04 | 3.4E-05 | 12053  | B cell leukemia/lymphoma 6                                                      |
| Bcr           | 0.58  | -0.80 | 5.2E-07 | 2.2E-08 | 110279 | breakpoint cluster region                                                       |
| Bdh1          | 0.29  | -1.77 | 1.8E-06 | 8.3E-08 | 71911  | 3-hydroxybutyrate dehydrogenase, type 1                                         |
| Bean1         | 2.15  | 1.10  | 2.1E-06 | 1.0E-07 | 65115  | brain expressed, associated with Nedd4, 1                                       |
| Beclin1       | 0.63  | -0.68 | 5.4E-03 | 6.9E-04 | 380785 | brain-enriched guanylate kinase-associated                                      |
| Beid5         | 0.61  | -0.71 | 2.4E-03 | 2.6E-04 | 67621  | BEN domain containing 5                                                         |
| Beid7         | 0.47  | -1.08 | 1.3E-03 | 1.3E-04 | 209645 | BEN domain containing 7                                                         |
| Bext3         | 1.76  | 0.82  | 4.6E-04 | 3.9E-05 | 382427 | bestrophin 3                                                                    |
| Bex1          | 1.51  | 0.59  | 3.7E-03 | 4.4E-04 | 19716  | brain expressed gene 1                                                          |
| Bex2          | 0.46  | -1.11 | 9.7E-05 | 6.9E-06 | 12069  | brain expressed X-linked 2                                                      |
| Bex4          | 0.53  | -0.92 | 7.4E-04 | 6.7E-05 | 406217 | brain expressed gene 4                                                          |
| Bhlhe40       | 2.02  | 1.01  | 2.1E-13 | 3.9E-15 | 20893  | basic helix-loop-helix family, member e40                                       |

|               |       |       |         |         |           |                                                                                  |
|---------------|-------|-------|---------|---------|-----------|----------------------------------------------------------------------------------|
| Bin1          | 2.42  | 1.27  | 5.2E-14 | 9.0E-16 | 30948     | bridging integrator 1                                                            |
| Blak          | 0.26  | -1.96 | 4.7E-04 | 3.9E-05 | 17060     | B cell linker                                                                    |
| Bloc1s1       | 1.52  | 0.60  | 6.9E-04 | 6.2E-05 | 14533     | biogenesis of lysosome-related organelles complex-1, subunit 1                   |
| Bmp7          | 0.49  | -1.02 | 1.8E-06 | 8.3E-08 | 12162     | bone morphogenetic protein 7                                                     |
| Bmper         | 1.58  | 0.66  | 7.9E-04 | 7.2E-05 | 73230     | BMP-binding endothelial regulator                                                |
| Bnip3         | 1.90  | 0.92  | 2.2E-08 | 7.5E-10 | 12176     | BCL2/adenovirus E1B interacting protein 3                                        |
| Bola3         | 1.94  | 0.95  | 6.0E-07 | 2.6E-08 | 78653     | Bola-like 3                                                                      |
| Bora          | 0.65  | -0.63 | 2.4E-03 | 2.4E-04 | 77444     | bora, aurora kinase A activator                                                  |
| Brinp1        | 0.32  | -1.63 | 1.7E-09 | 5.1E-11 | 56710     | bone morphogenic protein/retinoic acid inducible neural specific 1               |
| Bsn           | 0.55  | -0.86 | 5.2E-03 | 6.6E-04 | 12217     | basoon                                                                           |
| Bspry         | 0.37  | -1.45 | 1.0E-03 | 9.7E-05 | 192120    | B-box and SPRY domain containing                                                 |
| Bst2          | 1.61  | 0.69  | 4.4E-03 | 5.4E-04 | 69550     | bone marrow stromal cell antigen 2                                               |
| Bthd1         | 1.94  | 0.95  | 1.1E-09 | 3.3E-11 | 83962     | BTB (POZ) domain containing 1                                                    |
| Bthd11        | 0.49  | -1.03 | 4.8E-05 | 3.1E-06 | 74007     | BTB (POZ) domain containing 11                                                   |
| Btm9          | 2.46  | 1.30  | 3.2E-07 | 1.3E-08 | 237754    | butyrophilin-like 9                                                              |
| Bves          | 3.69  | 1.88  | 9.8E-22 | 8.0E-24 | 23828     | blood vessel epicardial substance                                                |
| C03006K11Rik  | 2.25  | 1.17  | 9.7E-06 | 5.4E-07 | 223665    | RIKEN cDNA C03006K11 gene                                                        |
| C030037D09Rik | 2.59  | 1.38  | 1.3E-06 | 5.9E-08 | 193280    | RIKEN cDNA C030037D09 gene                                                       |
| C130021120Rik | 0.35  | -1.50 | 6.8E-08 | 2.5E-09 | 100504399 | Riken cDNA C130021120 gene                                                       |
| C130080G10Rik | 2.97  | 1.57  | 5.8E-09 | 1.8E-10 | 100303644 | RIKEN cDNA C130080G10 gene                                                       |
| C1qtn9        | 2.51  | 1.33  | 7.7E-11 | 1.9E-12 | 239126    | C1q and tumor necrosis factor related protein 9                                  |
| C1ra          | 3.07  | 1.62  | 2.6E-10 | 6.9E-12 | 59909     | complement component 1, r subcomponent A                                         |
| C1s1          | 3.19  | 1.68  | 1.5E-28 | 6.5E-31 | 59908     | complement component 1, s subcomponent 1                                         |
| C3            | 16.71 | 4.06  | 3.6E-10 | 9.9E-12 | 12266     | complement component 3                                                           |
| C77080        | 0.64  | -0.64 | 8.1E-04 | 7.5E-05 | 97130     | expressed sequence C77080                                                        |
| Cachd1        | 0.62  | -0.69 | 3.2E-05 | 2.0E-06 | 320508    | cache domain containing 1                                                        |
| Cacna1c       | 0.65  | -0.62 | 1.4E-03 | 1.5E-04 | 12288     | calcium channel, voltage-dependent, L type, alpha 1C subunit                     |
| Cacna1d       | 0.50  | -1.01 | 1.5E-04 | 1.1E-05 | 12289     | calcium channel, voltage-dependent, L type, alpha 1D subunit                     |
| Cacna1e       | 0.51  | -0.98 | 4.5E-03 | 5.5E-04 | 12290     | calcium channel, voltage-dependent, R type, alpha 1E subunit                     |
| Cacna1g       | 0.55  | -0.85 | 5.9E-07 | 2.5E-08 | 12291     | calcium channel, voltage-dependent, T type, alpha 1G subunit                     |
| Cacna1i       | 2.41  | 1.27  | 8.7E-05 | 6.1E-06 | 239556    | calcium channel, voltage-dependent, alpha 1I subunit                             |
| Cacna1s       | 2.96  | 1.57  | 8.0E-20 | 7.3E-22 | 12292     | calcium channel, voltage-dependent, L type, alpha 1S subunit                     |
| Cacna2d1      | 1.81  | 0.85  | 1.3E-05 | 7.2E-07 | 12293     | calcium channel, voltage-dependent, alpha2/delta subunit 1                       |
| Cacna2d3      | 0.47  | -1.07 | 3.6E-04 | 2.9E-05 | 12294     | calcium channel, voltage-dependent, alpha2/delta subunit 3                       |
| Cacnb1        | 2.69  | 1.43  | 2.7E-16 | 3.5E-18 | 12295     | calcium channel, voltage-dependent, beta 1 subunit                               |
| Cacng1        | 4.57  | 2.19  | 1.3E-31 | 4.3E-34 | 12299     | calcium channel, voltage-dependent, gamma subunit 1                              |
| Cacng4        | 0.46  | -1.11 | 3.2E-04 | 3.6E-05 | 54377     | calcium channel, voltage-dependent, gamma subunit 4                              |
| Cacng6        | 2.23  | 1.16  | 1.4E-07 | 5.3E-09 | 54378     | calcium channel, voltage-dependent, gamma subunit 6                              |
| Cad           | 0.63  | -0.66 | 3.1E-06 | 1.5E-07 | 69719     | carbamoyl-phosphate synthetase 2, aspartate transcarbamylase, and dihydroorotase |
| Calcr         | 2.62  | 1.39  | 7.6E-07 | 3.3E-08 | 12311     | calcitonin receptor                                                              |
| Calcr1        | 1.82  | 0.86  | 1.1E-06 | 4.7E-08 | 54598     | calcitonin receptor-like                                                         |
| Calml4        | 2.15  | 1.10  | 3.5E-06 | 1.8E-07 | 75600     | calmodulin-like 4                                                                |
| Calr          | 0.65  | -0.63 | 1.2E-05 | 6.5E-07 | 12317     | calreticulin                                                                     |
| Camk1d        | 0.66  | -0.59 | 3.4E-03 | 3.9E-04 | 227541    | calcium/calmodulin-dependent protein kinase ID                                   |
| Camk2a        | 1.96  | 0.97  | 5.2E-08 | 1.9E-09 | 12322     | calcium/calmodulin-dependent protein kinase II alpha                             |
| Camk2b        | 5.66  | 2.50  | 2.8E-34 | 6.5E-37 | 12323     | calcium/calmodulin-dependent protein kinase II, beta                             |
| Camk2d        | 1.54  | 0.62  | 2.1E-05 | 1.3E-06 | 108058    | calcium/calmodulin-dependent protein kinase II, delta                            |
| Camkv         | 0.47  | -1.08 | 9.7E-04 | 9.2E-05 | 235604    | CaM kinase-like vesicle-associated                                               |
| Camta1        | 1.96  | 0.97  | 2.9E-04 | 2.3E-05 | 100072    | calmodulin binding transcription activator 1                                     |
| Cap2          | 2.34  | 1.23  | 2.0E-11 | 4.6E-13 | 67252     | CAP, adenylate cyclase-associated protein, 2                                     |
| Capn3         | 3.28  | 1.71  | 1.5E-22 | 1.1E-24 | 12325     | capain 3                                                                         |
| Car12         | 0.30  | -1.74 | 2.0E-06 | 9.3E-08 | 76459     | carbonic anhydrase 12                                                            |
| Car14         | 3.73  | 1.90  | 2.9E-16 | 3.7E-18 | 23831     | carbonic anhydrase 14                                                            |
| Car3          | 9.16  | 3.20  | 3.9E-27 | 1.9E-29 | 12350     | carbonic anhydrase 3                                                             |
| Card14        | 0.38  | -1.40 | 2.5E-08 | 8.5E-10 | 170720    | caspase recruitment domain family, member 14                                     |
| Carmin        | 1.87  | 0.90  | 2.5E-03 | 2.7E-04 | 328968    | cardiac mesoderm enhancer-associated non-coding RNA                              |
| Carns1        | 3.39  | 1.76  | 5.5E-16 | 7.5E-18 | 107239    | carnosine synthase 1                                                             |
| Casd1         | 1.59  | 0.67  | 2.2E-05 | 1.3E-06 | 213819    | CASI domain containing 1                                                         |
| Casq1         | 7.45  | 2.90  | 1.4E-39 | 2.1E-42 | 12372     | calsequestrin 1                                                                  |
| Casq2         | 3.98  | 1.99  | 4.6E-25 | 2.9E-27 | 12373     | calsequestrin 2                                                                  |
| Cav1          | 1.91  | 0.93  | 1.0E-10 | 2.6E-12 | 12389     | caveolin 1, caveolae protein                                                     |
| Cav2          | 1.82  | 0.87  | 1.2E-06 | 5.7E-08 | 12390     | caveolin 2                                                                       |
| Cav3          | 2.85  | 1.51  | 2.6E-17 | 3.1E-19 | 12391     | caveolin 3                                                                       |
| Chr4          | 1.69  | 0.76  | 8.6E-04 | 8.0E-05 | 234309    | carbamoyl reductase 4                                                            |
| Cbs           | 0.49  | -1.02 | 2.1E-03 | 2.2E-04 | 12411     | cystathionine beta-synthase                                                      |
| Ccdc106       | 0.42  | -1.25 | 5.6E-06 | 2.9E-07 | 323821    | coiled-coil domain containing 106                                                |
| Ccdc141       | 1.93  | 0.95  | 4.2E-07 | 1.8E-08 | 545428    | coiled-coil domain containing 141                                                |
| Ccdc43        | 1.75  | 0.81  | 2.4E-07 | 9.5E-09 | 52715     | coiled-coil domain containing 43                                                 |
| Ccdc69        | 3.26  | 1.70  | 5.8E-14 | 1.0E-15 | 52570     | coiled-coil domain containing 69                                                 |
| Ccdc85a       | 1.85  | 0.89  | 4.6E-04 | 3.9E-05 | 216613    | coiled-coil domain containing 85A                                                |
| Ccdc88c       | 1.93  | 0.95  | 2.5E-10 | 6.6E-12 | 68339     | coiled-coil domain containing 88C                                                |
| Ccdc91        | 1.53  | 0.62  | 1.1E-04 | 7.9E-06 | 67015     | coiled-coil domain containing 91                                                 |
| Ccdc92        | 0.32  | -1.63 | 1.7E-04 | 1.2E-05 | 215707    | coiled-coil domain containing 92                                                 |
| Cel21a        | 0.55  | -0.86 | 7.2E-03 | 9.7E-04 | 18829     | chemokine (C-C motif) ligand 21A (serine)                                        |
| Cend2         | 0.60  | -0.75 | 9.3E-07 | 4.1E-08 | 12444     | cyclin D2                                                                        |
| Cene1         | 0.61  | -0.71 | 1.8E-05 | 1.1E-06 | 12447     | cyclin E1                                                                        |
| Ceng1         | 3.04  | 1.60  | 9.1E-22 | 7.4E-24 | 12450     | cyclin G1                                                                        |
| CD163         | 4.40  | 2.14  | 1.6E-17 | 1.8E-19 | 93671     | CD163 antigen                                                                    |
| CD300hg       | 4.14  | 2.05  | 1.6E-16 | 2.0E-18 | 52685     | CD300 antigen like family member G                                               |
| CD33          | 1.86  | 0.90  | 2.5E-03 | 2.7E-04 | 12489     | CD33 antigen                                                                     |
| CD36          | 3.35  | 1.75  | 6.2E-22 | 4.9E-24 | 12491     | CD36 antigen                                                                     |
| CD59a         | 2.14  | 1.09  | 1.6E-06 | 7.2E-08 | 12509     | CD59a antigen                                                                    |
| CD84          | 1.82  | 0.86  | 9.6E-04 | 9.1E-05 | 12523     | CD84 antigen                                                                     |
| CD93          | 1.52  | 0.60  | 2.5E-05 | 1.5E-06 | 17064     | CD93 antigen                                                                     |
| CD97          | 1.50  | 0.59  | 6.2E-04 | 5.5E-05 | 26364     | CD97 antigen                                                                     |
| Cdc34         | 1.95  | 0.96  | 5.0E-09 | 1.6E-10 | 216150    | cell division cycle 34                                                           |
| Cdc42bpg      | 0.62  | -0.68 | 2.0E-03 | 2.1E-04 | 240505    | CDC42 binding protein kinase gamma (DMPK-like)                                   |
| Cdc42ep2      | 1.96  | 0.97  | 1.1E-11 | 2.4E-13 | 104252    | CDC42 effector protein (Rho GTPase binding) 2                                    |
| Cdea7         | 0.58  | -0.79 | 1.4E-09 | 4.2E-11 | 66953     | cell division cycle associated 7                                                 |
| Cdea7l        | 0.65  | -0.63 | 3.0E-03 | 3.4E-04 | 217946    | cell division cycle associated 7 like                                            |
| Cdh11         | 0.63  | -0.67 | 1.9E-05 | 1.1E-06 | 12552     | cadherin 11                                                                      |
| Cdh13         | 3.02  | 1.59  | 7.1E-29 | 3.0E-31 | 12554     | cadherin 13                                                                      |
| Cdh24         | 0.52  | -0.93 | 1.3E-04 | 9.5E-06 | 239096    | cadherin-like 24                                                                 |
| Cdh3          | 0.31  | -1.71 | 1.8E-10 | 4.7E-12 | 12560     | cadherin 3                                                                       |
| Cdh6          | 0.51  | -0.97 | 1.1E-03 | 1.1E-04 | 12563     | cadherin 6                                                                       |
| Cdhr3         | 3.29  | 1.72  | 1.3E-07 | 4.9E-09 | 68764     | cadherin-related family member 3                                                 |
| Ceacam1       | 1.92  | 0.94  | 6.7E-04 | 6.0E-05 | 26365     | carcinoembryonic antigen-related cell adhesion molecule 1                        |
| Cebpd         | 2.02  | 1.02  | 1.4E-05 | 8.3E-07 | 12609     | CCAAT/enhancer binding protein (C/EBP), delta                                    |
| Celsr1        | 0.38  | -1.40 | 2.6E-03 | 2.9E-04 | 12614     | cadherin, EGF LAG seven-pass G-type receptor 1                                   |
| Celsr2        | 0.45  | -1.17 | 2.9E-03 | 3.3E-04 | 53883     | cadherin, EGF LAG seven-pass G-type receptor 2                                   |
| Cep170b       | 0.48  | -1.07 | 1.4E-03 | 1.4E-04 | 217882    | centrosomal protein 170B                                                         |
| Cep85         | 2.16  | 1.11  | 1.2E-15 | 1.8E-17 | 70012     | centrosomal protein 85                                                           |
| Cep85l        | 1.94  | 0.96  | 2.3E-05 | 1.4E-06 | 100038725 | centrosomal protein 85-like                                                      |
| Cers1         | 1.57  | 0.65  | 9.7E-04 | 9.1E-05 | 93898     | ceramide synthase 1                                                              |
| Cfl2          | 2.54  | 1.34  | 2.5E-15 | 3.8E-17 | 12632     | cofilin 2, muscle                                                                |
| Chaf1a        | 0.64  | -0.64 | 1.1E-06 | 5.2E-08 | 27221     | chromatin assembly factor 1, subunit A (p150)                                    |
| Chaf1b        | 0.64  | -0.65 | 1.8E-04 | 1.3E-05 | 110749    | chromatin assembly factor 1, subunit B (p60)                                     |
| Chchd10       | 5.89  | 2.56  | 3.0E-42 | 3.6E-45 | 103172    | coiled-coil-helix-coiled-coil-helix domain containing 10                         |
| Chchd3        | 2.18  | 1.12  | 1.0E-14 | 1.6E-16 | 66075     | coiled-coil-helix-coiled-coil-helix domain containing 3                          |
| Chd3          | 0.56  | -0.83 | 4.7E-08 | 1.7E-09 | 216848    | chromodomain helicase DNA binding protein 3                                      |
| Chd5          | 0.29  | -1.77 | 2.5E-03 | 2.8E-04 | 269610    | chromodomain helicase DNA binding protein 5                                      |
| Chd7          | 1.53  | 0.61  | 1.4E-04 | 1.0E-05 | 320790    | chromodomain helicase DNA binding protein 7                                      |
| Chrac1        | 1.54  | 0.63  | 6.0E-04 | 5.3E-05 | 93696     | chromatin accessibility complex 1                                                |
| Chrdl1        | 2.21  | 1.14  | 1.2E-05 | 6.6E-07 | 83453     | chordin-like 1                                                                   |
| Chrm3         | 0.51  | -0.97 | 5.9E-03 | 7.6E-04 | 12671     | cholinergic receptor, muscarinic 3, cardiac                                      |
| Chrna9        | 13.55 | 3.76  | 1.8E-30 | 6.4E-33 | 231252    | cholinergic receptor, nicotinic, alpha polypeptide 9                             |
| Chrab1        | 1.70  | 0.76  | 1.1E-05 | 6.1E-07 | 11443     | cholinergic receptor, nicotinic, beta polypeptide 1 (muscle)                     |
| Chrad         | 2.00  | 1.00  | 4.2E-08 | 1.5E-09 | 11447     | cholinergic receptor, nicotinic, delta polypeptide                               |
| Chrng         | 1.70  | 0.77  | 6.1E-05 | 4.2E-06 | 11449     | cholinergic receptor, nicotinic, gamma polypeptide                               |
| Chst10        | 0.55  | -0.87 | 4.6E-04 | 3.9E-05 | 98388     | carbohydrate sulfotransferase 10                                                 |
| Chst2         | 0.61  | -0.70 | 3.9E-06 | 2.0E-07 | 54371     | carbohydrate sulfotransferase 2                                                  |
| Cidea         | 5.27  | 2.40  | 2.0E-15 | 2.9E-17 | 12683     | cell death-inducing DNA fragmentation factor, alpha subunit-like effector A      |
| Ctip          | 1.53  | 0.62  | 5.7E-03 | 7.4E-04 | 214445    | cartilage intermediate layer protein, nucleotide pyrophosphohydrolase            |
| Ctsd3         | 3.40  | 1.77  | 1.7E-12 | 3.6E-14 | 171749    | CDGSH iron sulfur domain 3                                                       |
| Ctsh          | 2.64  | 1.40  | 1.1E-09 | 3.2E-11 | 12700     | cytokine inducible SH2-containing protein                                        |
| Cited1        | 1.72  | 0.78  | 6.7E-04 | 6.0E-05 | 12705     | Cbp/p300-interacting transactivator with Glu/Asp-rich carboxy-terminal domain 1  |
| Ciz1          | 1.54  | 0.62  | 2.4E-05 | 1.4E-06 | 68379     | CDKN1A interacting zinc finger protein 1                                         |
| Ckm           | 7.11  | 2.83  | 3.3E-35 | 6.0E-38 | 12715     | creatine kinase, muscle                                                          |
| Ckmt2         | 9.88  | 3.30  | 7.9E-41 | 1.1E-43 | 76722     | creatine kinase, mitochondrial 2                                                 |
| Clef1         | 0.52  | -0.94 | 4.3E-03 | 5.2E-04 | 56708     | cardiotrophin-like cytokine factor 1                                             |
| Clen1         | 3.89  | 1.96  | 6.2E-15 | 9.5E-17 | 12723     | chloride channel 1                                                               |

|               |       |       |         |         |           |                                                                                      |
|---------------|-------|-------|---------|---------|-----------|--------------------------------------------------------------------------------------|
| Cldn1         | 0.38  | -1.38 | 1.8E-06 | 8.5E-08 | 12737     | claudin 1                                                                            |
| Cldn15        | 5.01  | 2.32  | 1.6E-11 | 3.8E-13 | 60363     | claudin 15                                                                           |
| Cldn4         | 0.19  | -2.38 | 1.3E-03 | 1.3E-04 | 12740     | claudin 4                                                                            |
| Cldn5         | 1.78  | 0.83  | 2.8E-08 | 9.6E-10 | 12741     | claudin 5                                                                            |
| Clec16a       | 1.53  | 0.62  | 6.7E-05 | 4.6E-06 | 74374     | C-type lectin domain family 16, member A                                             |
| Clec2d        | 2.40  | 1.26  | 1.2E-05 | 6.8E-07 | 93694     | C-type lectin domain family 2, member d                                              |
| Clec2l        | 0.50  | -1.00 | 4.6E-03 | 5.6E-04 | 665180    | C-type lectin domain family, member L                                                |
| Clec3b        | 2.62  | 1.39  | 1.3E-21 | 2.1E-23 | 1192      | C-type lectin domain family 3, member b                                              |
| Clic4         | 1.50  | 0.59  | 4.1E-05 | 2.6E-06 | 29876     | chloride intracellular channel 4 (mitochondrial)                                     |
| Clic5         | 3.35  | 1.75  | 4.3E-15 | 6.6E-17 | 224796    | chloride intracellular channel 5                                                     |
| Clix          | 1.52  | 0.60  | 2.9E-05 | 1.8E-06 | 270166    | caseinolytic peptidase X                                                             |
| Clu           | 0.49  | -1.02 | 8.6E-05 | 6.0E-06 | 12759     | clusterin                                                                            |
| Cluh          | 1.74  | 0.80  | 3.1E-07 | 1.3E-08 | 74148     | clustered mitochondria (cluA/CLU1) homolog                                           |
| Clybl         | 1.97  | 0.98  | 1.5E-06 | 6.7E-08 | 69634     | citrate lyase beta like                                                              |
| Cmbl          | 6.09  | 2.61  | 9.0E-36 | 1.5E-38 | 69574     | carboxymethylenebutenolidase-like                                                    |
| Cmya5         | 7.37  | 2.88  | 2.3E-29 | 9.3E-32 | 76469     | cardiomyopathy associated 5                                                          |
| Cnih2         | 0.41  | -1.29 | 2.7E-07 | 1.1E-08 | 12794     | cornichon homolog 2                                                                  |
| Cnn1          | 3.06  | 1.61  | 5.1E-08 | 1.9E-09 | 12797     | calponin 1                                                                           |
| Cnp           | 1.94  | 0.96  | 1.3E-09 | 3.9E-11 | 12799     | 2',3'-cyclic nucleotide 3' phosphodiesterase                                         |
| Cntn4         | 0.49  | -1.02 | 4.6E-03 | 5.7E-04 | 269784    | contactin 4                                                                          |
| Cntnap4       | 0.42  | -1.24 | 2.6E-05 | 1.6E-06 | 170571    | contactin associated protein-like 4                                                  |
| Cobb          | 1.74  | 0.80  | 3.2E-08 | 1.1E-09 | 12808     | cordonnin                                                                            |
| Coq4          | 1.55  | 0.64  | 6.0E-06 | 3.2E-07 | 102339    | component of oligomeric golgi complex 4                                              |
| Coll5a1       | 1.55  | 0.63  | 3.4E-05 | 2.2E-06 | 12819     | collagen, type XV, alpha 1                                                           |
| Coll3a1       | 1.55  | 0.63  | 2.6E-05 | 1.6E-06 | 237759    | collagen, type XVIII, alpha 1                                                        |
| Coll26a1      | 0.62  | -0.69 | 2.7E-04 | 2.1E-05 | 140709    | collagen, type XXVI, alpha 1                                                         |
| Coll28a1      | 3.34  | 1.74  | 6.2E-07 | 2.7E-08 | 213945    | collagen, type XXVIII, alpha 1                                                       |
| Col4a1        | 1.63  | 0.71  | 9.0E-07 | 4.0E-08 | 12826     | collagen, type IV, alpha 1                                                           |
| Col4a2        | 1.54  | 0.62  | 3.0E-05 | 1.9E-06 | 12827     | collagen, type IV, alpha 2                                                           |
| Col4a6        | 0.37  | -1.42 | 6.6E-04 | 5.9E-05 | 94216     | collagen, type IV, alpha 6                                                           |
| Col5a3        | 2.50  | 1.32  | 2.7E-21 | 2.3E-23 | 53867     | collagen, type V, alpha 3                                                            |
| Col6a6        | 1.72  | 0.78  | 3.3E-06 | 1.6E-07 | 245026    | collagen, type VI, alpha 6                                                           |
| Col8a2        | 0.43  | -1.22 | 1.6E-06 | 7.2E-08 | 329941    | collagen, type VIII, alpha 2                                                         |
| Col9a2        | 0.41  | -1.27 | 4.3E-03 | 5.3E-04 | 12840     | collagen, type IX, alpha 2                                                           |
| Coq10a        | 2.88  | 1.52  | 1.3E-16 | 1.7E-18 | 210582    | coenzyme Q10 homolog A                                                               |
| Coq3          | 1.78  | 0.83  | 5.1E-05 | 3.4E-06 | 230027    | coenzyme Q3 homolog, methyltransferase                                               |
| Coq5          | 1.55  | 0.17  | 9.2E-16 | 1.3E-17 | 52064     | coenzyme Q5 homolog, methyltransferase                                               |
| Coq7          | 1.65  | 0.72  | 2.3E-04 | 1.8E-05 | 12850     | demethyl-Q7                                                                          |
| Coq9          | 2.74  | 1.45  | 4.7E-25 | 3.1E-27 | 67914     | coenzyme Q9 homolog                                                                  |
| Coro2a        | 0.59  | -0.77 | 5.4E-03 | 6.9E-04 | 107684    | coronin, actin binding protein 2A                                                    |
| Coro6         | 3.44  | 1.78  | 6.8E-19 | 6.9E-21 | 216961    | coronin 6                                                                            |
| Cox14         | 1.72  | 0.78  | 8.1E-07 | 3.6E-08 | 66379     | cytochrome c oxidase assembly protein 14                                             |
| Cox15         | 1.56  | 0.65  | 1.7E-06 | 8.1E-08 | 226139    | COX15 homolog, cytochrome c oxidase assembly protein                                 |
| Cox17         | 1.85  | 0.89  | 4.5E-05 | 3.0E-06 | 12856     | cytochrome c oxidase, subunit XVII assembly protein homolog                          |
| Cox4i1        | 1.88  | 0.91  | 8.0E-09 | 2.6E-10 | 12857     | cytochrome c oxidase subunit IV isoform 1                                            |
| Cox5a         | 2.18  | 1.12  | 2.3E-15 | 3.4E-17 | 12858     | cytochrome c oxidase, subunit Va                                                     |
| Cox5b         | 1.80  | 0.85  | 1.9E-03 | 1.9E-04 | 12859     | cytochrome c oxidase, subunit Vb                                                     |
| Cox6a2        | 3.65  | 1.87  | 6.2E-28 | 2.9E-30 | 12862     | cytochrome c oxidase, subunit VI a, polypeptide 2                                    |
| Cox6b1        | 1.82  | 0.87  | 5.4E-09 | 1.7E-10 | 110323    | cytochrome c oxidase, subunit VIb polypeptide 1                                      |
| Cox6c         | 1.57  | 0.65  | 3.6E-05 | 2.3E-06 | 12864     | cytochrome c oxidase, subunit VIc                                                    |
| Cox7a1        | 12.91 | 3.69  | 6.7E-26 | 4.0E-28 | 12865     | cytochrome c oxidase, subunit VIIa 1                                                 |
| Cox7a2        | 2.92  | 1.01  | 5.5E-07 | 2.3E-08 | 12866     | cytochrome c oxidase, subunit VIIa 2                                                 |
| Cox7b         | 1.74  | 0.80  | 3.2E-08 | 1.1E-09 | 66142     | cytochrome c oxidase subunit VIIb                                                    |
| Cox8b         | 4.37  | 2.13  | 2.2E-23 | 1.6E-25 | 12869     | cytochrome c oxidase, subunit VIIIB                                                  |
| Cpa4          | 3.79  | 1.92  | 1.5E-03 | 1.5E-04 | 71791     | carboxypeptidase A4                                                                  |
| Cpeb3         | 2.64  | 1.40  | 1.0E-07 | 4.0E-09 | 208922    | cytoplasmic polyadenylation element binding protein 3                                |
| Cpeb4         | 1.77  | 0.82  | 1.4E-04 | 9.9E-06 | 67579     | cytoplasmic polyadenylation element binding protein 4                                |
| Cpm           | 0.57  | -0.82 | 3.5E-08 | 1.2E-09 | 70574     | carboxypeptidase M                                                                   |
| Cpne5         | 0.36  | -1.47 | 8.3E-08 | 3.1E-09 | 240058    | copine V                                                                             |
| Cpped1        | 1.71  | 0.78  | 3.6E-08 | 1.3E-09 | 223978    | calcineurin-like phosphoesterase domain containing 1                                 |
| Cpt1b         | 8.24  | 3.04  | 2.3E-53 | 1.1E-56 | 12895     | carnitine palmitoyltransferase 1b, muscle                                            |
| Cpt2          | 1.73  | 0.79  | 2.1E-07 | 8.2E-09 | 12896     | carnitine palmitoyltransferase 2                                                     |
| Cpxm2         | 0.42  | -1.24 | 6.9E-03 | 9.1E-04 | 55987     | carboxypeptidase X 2 (M14 family)                                                    |
| Crabp1        | 0.40  | -1.33 | 4.3E-13 | 8.3E-15 | 12903     | cellular retinoic acid binding protein 1                                             |
| Crabp2        | 0.54  | -0.88 | 1.5E-03 | 1.5E-04 | 12904     | cellular retinoic acid binding protein II                                            |
| Crat          | 3.80  | 1.92  | 5.2E-31 | 1.8E-33 | 12908     | carnitine acetyltransferase                                                          |
| Crela1        | 1.61  | 0.69  | 1.5E-05 | 8.6E-07 | 171508    | cysteine-rich with EGF-like domains 1                                                |
| Crela2        | 0.52  | -0.94 | 3.9E-09 | 1.2E-10 | 76737     | cysteine-rich with EGF-like domains 2                                                |
| Crmp1         | 0.55  | -0.85 | 1.5E-03 | 1.6E-04 | 12933     | collapsin response mediator protein 1                                                |
| Cryab         | 2.03  | 1.02  | 5.1E-08 | 1.9E-09 | 12955     | crystallin, alpha B                                                                  |
| CryI1         | 0.55  | -0.87 | 2.2E-04 | 1.7E-05 | 68631     | crystallin, lambda 1                                                                 |
| Cs            | 1.92  | 0.94  | 6.5E-11 | 1.6E-12 | 12974     | citrate synthase                                                                     |
| Csf2rb2       | 2.35  | 1.23  | 8.8E-08 | 3.3E-09 | 12984     | colony stimulating factor 2 receptor, beta 2, low-affinity (granulocyte-macrophage)  |
| Csl           | 1.76  | 0.82  | 7.0E-04 | 6.3E-05 | 71832     | citrate synthase like                                                                |
| Cspg5         | 0.42  | -1.23 | 6.2E-06 | 3.3E-07 | 29873     | chondroitin sulfate proteoglycan 5                                                   |
| Csrp3         | 2.96  | 1.56  | 1.7E-13 | 3.1E-15 | 13009     | cysteine and glycine-rich protein 3                                                  |
| Ctla2a        | 1.74  | 0.80  | 2.2E-03 | 2.4E-04 | 13024     | cytotoxic T lymphocyte-associated protein 2 alpha                                    |
| Cttna3        | 3.68  | 1.88  | 1.1E-12 | 2.3E-14 | 216033    | catenin (cadherin associated protein), alpha 3                                       |
| Cttnbp1       | 1.75  | 0.81  | 1.1E-08 | 3.6E-10 | 67087     | catenin beta interacting protein 1                                                   |
| Cttnbp2       | 0.47  | -1.08 | 9.3E-06 | 5.1E-07 | 30785     | curtactin binding protein 2                                                          |
| Cux2          | 0.51  | -0.97 | 2.8E-04 | 2.2E-05 | 13048     | cut-like homeobox 2                                                                  |
| Cwh43         | 0.25  | -2.01 | 1.7E-03 | 1.7E-04 | 231293    | cell wall biogenesis 43 C-terminal homolog                                           |
| Cxcl14        | 0.28  | -1.82 | 1.6E-08 | 5.2E-10 | 57266     | chemokine (C-X-C motif) ligand 14                                                    |
| Cyb5d2        | 1.65  | 0.72  | 4.6E-03 | 5.7E-04 | 192986    | cytochrome b5 domain containing 2                                                    |
| Cyb5r1        | 1.87  | 0.90  | 3.4E-11 | 8.2E-13 | 72017     | cytochrome b5 reductase 1                                                            |
| Cycl1         | 2.18  | 1.13  | 1.0E-15 | 1.5E-17 | 66445     | cytochrome c-1                                                                       |
| Cycs          | 2.16  | 1.11  | 5.8E-05 | 3.9E-06 | 13063     | cytochrome c, somatic                                                                |
| Cypl1b1       | 2.42  | 1.27  | 1.6E-03 | 1.6E-04 | 13078     | cytochrome P450, family 1, subfamily b, polypeptide 1                                |
| Cyp27a1       | 3.01  | 1.59  | 7.6E-11 | 1.9E-12 | 104086    | cytochrome P450, family 27, subfamily a, polypeptide 1                               |
| Cyp2d22       | 1.82  | 0.87  | 7.3E-05 | 5.0E-06 | 56448     | cytochrome P450, family 2, subfamily d, polypeptide 22                               |
| Cyp2w1        | 0.17  | -2.60 | 6.5E-03 | 8.6E-04 | 545817    | cytochrome P450, family 2, subfamily w, polypeptide 1                                |
| Cyp51         | 0.60  | -0.74 | 2.6E-08 | 9.2E-10 | 13121     | cytochrome P450, family 51                                                           |
| Cystm1        | 6.47  | 2.69  | 2.0E-17 | 2.4E-19 | 60600     | cysteine-rich transmembrane module containing 1                                      |
| D83002SP12Rik | 0.47  | -1.09 | 4.8E-04 | 4.1E-05 | 100303738 | RIKEN cDNA D83002SP12 gene                                                           |
| D83002A088Rik | 0.48  | -1.06 | 6.7E-05 | 4.6E-06 | 3193771   | RIKEN cDNA D83002A088 gene                                                           |
| D101hu81e     | 1.69  | -0.75 | 5.5E-08 | 2.0E-09 | 28295     | DNA segment, Chr. 10, Johns Hopkins University 81 expressed                          |
| D330045A20Rik | 1.98  | 0.98  | 2.1E-03 | 2.2E-04 | 102871    | RIKEN cDNA D330045A20 gene                                                           |
| D630045J12Rik | 0.61  | -0.72 | 1.5E-04 | 1.1E-05 | 330286    | RIKEN cDNA D630045J12 gene                                                           |
| D830015G02Rik | 1.89  | 0.92  | 5.3E-07 | 2.3E-08 | 791403    | RIKEN cDNA D830015G02 gene                                                           |
| Dag1          | 1.66  | 0.74  | 2.2E-06 | 1.0E-07 | 13138     | dystroglycan 1                                                                       |
| Dand5         | 1.69  | 0.75  | 6.0E-03 | 7.7E-04 | 23863     | DAN domain family, member 5                                                          |
| Dband1        | 0.58  | -0.79 | 3.2E-03 | 3.7E-04 | 72185     | dysbindin (dystrobrevin binding protein 1) domain containing 1                       |
| Dband2        | 1.63  | 0.70  | 6.8E-03 | 9.0E-04 | 52840     | dysbindin (dystrobrevin binding protein 1) domain containing 2                       |
| Dbn1          | 0.63  | -0.67 | 7.7E-05 | 5.3E-06 | 13169     | drebrin-like                                                                         |
| Dbp           | 1.70  | 0.77  | 7.1E-04 | 6.4E-05 | 13170     | D site albumin promoter binding protein                                              |
| Dcaf6         | 1.74  | 0.80  | 9.8E-10 | 2.8E-11 | 74106     | DBP1 and CUL4 associated factor 6                                                    |
| Dec           | 0.38  | -1.38 | 2.4E-05 | 1.5E-06 | 13176     | delated in colorectal carcinoma                                                      |
| Det           | 0.49  | -1.02 | 4.8E-04 | 3.4E-04 | 13190     | dephospho tautomerase                                                                |
| Detd          | 0.47  | -1.06 | 7.1E-04 | 6.5E-05 | 320685    | 4CMP deaminase                                                                       |
| Ddc           | 2.16  | 1.11  | 2.9E-09 | 8.7E-11 | 13195     | dopa decarboxylase                                                                   |
| Ddit4f        | 2.12  | 1.08  | 1.1E-08 | 3.4E-10 | 73284     | DNA-damage-inducible transcript 4-like                                               |
| Ddo           | 10.85 | 3.44  | 2.8E-33 | 7.3E-36 | 70503     | D-aspartate oxidase                                                                  |
| Ddx11         | 0.61  | -0.72 | 3.6E-04 | 2.9E-05 | 320209    | DEAD/H (Asp-Glu-Ala-Asp/His) box helicase 11                                         |
| Ddx25         | 0.41  | -1.30 | 1.2E-05 | 6.7E-07 | 30959     | DEAD (Asp-Glu-Ala-Asp) box polypeptide 25                                            |
| Deb1          | 1.68  | 0.75  | 4.5E-04 | 3.8E-05 | 26901     | differentially expressed in B16f10 1                                                 |
| Deer1         | 1.95  | 0.96  | 4.3E-11 | 1.0E-12 | 67460     | 2,4-dienyl CoA reductase 1, mitochondrial                                            |
| Denn4db       | 1.65  | 0.73  | 4.6E-07 | 2.0E-08 | 229541    | DENN/MADD domain containing 4B                                                       |
| Deptor        | 2.06  | 1.04  | 1.8E-07 | 7.2E-09 | 97998     | DEP domain containing MTOR-interacting protein                                       |
| Des           | 3.46  | 1.79  | 9.1E-21 | 7.9E-23 | 13346     | desmin                                                                               |
| Dher24        | 0.55  | -0.88 | 3.4E-07 | 1.4E-08 | 74754     | 24-dehydrocholesterol reductase                                                      |
| Dhdh          | 2.36  | 1.24  | 7.7E-07 | 3.4E-08 | 71755     | dihydrodiol dehydrogenase (dimeric)                                                  |
| Dhrs7c        | 4.09  | 2.03  | 2.6E-26 | 1.5E-28 | 68460     | dehydrogenase/reductase (SDR family) member 7C                                       |
| Dio2          | 1.36  | 0.97  | 6.2E-04 | 5.4E-05 | 13371     | deiodinase, iodothyronine, type II                                                   |
| Dkk2          | 0.60  | -0.75 | 6.0E-04 | 5.3E-05 | 55811     | dickkopf homolog 2                                                                   |
| Dlat          | 2.35  | 1.23  | 5.0E-19 | 5.1E-21 | 235339    | dihydrolipamide S-acetyltransferase (E2 component of pyruvate dehydrogenase complex) |
| Did           | 2.07  | 1.05  | 2.7E-12 | 5.8E-14 | 13382     | dihydrolipamide dehydrogenase                                                        |
| Dlst          | 1.79  | 0.84  | 3.8E-09 | 1.2E-10 | 78920     | dihydrolipamide S-succinyltransferase (E2 component of 2-oxo-glutarate complex)      |
| Dlx5          | 0.43  | -1.21 | 1.8E-05 | 1.1E-06 | 13395     | distal-less homeobox 5                                                               |
| Dmd           | 2.65  | 1.41  | 1.3E-19 | 1.2E-21 | 13405     | dystrophin, muscular dystrophy                                                       |
| Dmpk          | 2.20  | 1.14  | 2.2E-12 | 4.7E-14 | 13400     | dystrophin myotonic-protein kinase                                                   |
| Dnaaf2        | 0.66  | -0.60 | 5.2E-03 | 6.5E-04 | 109065    | dynein, axonemal assembly factor 2                                                   |

|               |       |       |         |         |           |                                                                                |
|---------------|-------|-------|---------|---------|-----------|--------------------------------------------------------------------------------|
| Dnah11        | 0.59  | -0.77 | 6.6E-03 | 8.7E-04 | 13411     | dyncin, axonemal, heavy chain 11                                               |
| Dnaic1        | 7.18  | 2.84  | 3.1E-24 | 2.1E-26 | 68922     | dyncin, axonemal, intermediate chain 1                                         |
| Dnaja3        | 1.56  | 0.65  | 5.3E-06 | 2.8E-07 | 83945     | DnaJ (Hsp40) homolog, subfamily A, member 3                                    |
| Dnaja4        | 1.84  | 0.88  | 1.7E-07 | 6.8E-09 | 58233     | DnaJ (Hsp40) homolog, subfamily A, member 4                                    |
| Dnajb11       | 0.66  | -0.60 | 1.1E-05 | 6.0E-07 | 67838     | DnaJ (Hsp40) homolog, subfamily B, member 11                                   |
| Dnajb4        | 1.99  | 0.99  | 5.3E-11 | 1.3E-12 | 67035     | DnaJ (Hsp40) homolog, subfamily B, member 4                                    |
| Dnajb5        | 1.96  | 0.97  | 9.6E-11 | 2.4E-12 | 56323     | DnaJ (Hsp40) homolog, subfamily B, member 5                                    |
| Dnajc12       | 2.35  | 0.97  | 6.2E-07 | 2.7E-08 | 30045     | DnaJ (Hsp40) homolog, subfamily C, member 12                                   |
| Dnajc15       | 1.54  | 0.62  | 2.9E-03 | 3.2E-04 | 66148     | DnaJ (Hsp40) homolog, subfamily C, member 15                                   |
| Dnajc19       | 1.63  | 0.71  | 6.1E-03 | 8.0E-04 | 67713     | DnaJ (Hsp40) homolog, subfamily C, member 19                                   |
| Dnase11       | 2.44  | 1.29  | 2.6E-12 | 5.5E-14 | 69537     | deoxyribonuclease I-like 1                                                     |
| Dner          | 0.45  | -1.17 | 1.3E-04 | 9.5E-06 | 227325    | delta/notch-like EGF-related receptor                                          |
| Dnm3os        | 0.61  | -0.72 | 1.5E-06 | 7.0E-08 | 474332    | dynamin 3, opposite strand                                                     |
| Dnmt1         | 0.64  | -0.63 | 7.9E-06 | 4.3E-07 | 13433     | DNA methyltransferase (cytosine-5) 1                                           |
| Dnph1         | 0.53  | -0.92 | 2.1E-04 | 1.6E-05 | 381101    | 2'-deoxynucleoside 5'-phosphate N-hydrolase 1                                  |
| Doc2b         | 0.47  | -1.10 | 3.6E-04 | 3.0E-05 | 13447     | double C2, beta                                                                |
| Dos           | 0.59  | -0.77 | 5.2E-03 | 6.5E-04 | 100503659 | downstream of Stk11                                                            |
| Dpep1         | 1.70  | 0.76  | 4.3E-04 | 3.6E-05 | 13479     | dipeptidase 1 (renal)                                                          |
| Dpf3          | 2.87  | 1.52  | 1.3E-07 | 5.1E-09 | 70127     | D4, zinc and double PHD fingers, family 3                                      |
| Dpys4         | 0.60  | -0.74 | 1.7E-03 | 1.7E-04 | 26757     | dihydropyrimidinase-like 4                                                     |
| Dram2         | 1.62  | 0.70  | 2.0E-05 | 1.2E-06 | 67171     | DNA-damage regulated autophagy modulator 2                                     |
| Dsc2          | 0.23  | -2.12 | 5.3E-19 | 5.3E-21 | 13506     | desmocollin 2                                                                  |
| Dsg2          | 0.22  | -2.20 | 1.2E-04 | 8.7E-06 | 13511     | desmoglein 2                                                                   |
| Dtna          | 4.07  | 2.03  | 1.9E-26 | 1.1E-28 | 13527     | dystrobrevin alpha                                                             |
| Dtnb          | 0.62  | -0.69 | 2.3E-03 | 2.5E-04 | 13528     | dystrobrevin, beta                                                             |
| Dupd1         | 8.81  | 3.14  | 8.3E-18 | 9.3E-20 | 435391    | dual specificity phosphatase and pro isomerase domain containing 1             |
| Dusp1         | 1.57  | 0.65  | 3.1E-04 | 2.5E-05 | 19252     | dual specificity phosphatase 1                                                 |
| Dusp10        | 1.61  | 0.69  | 2.5E-05 | 1.5E-06 | 63953     | dual specificity phosphatase 10                                                |
| Dusp13        | 5.77  | 2.53  | 2.7E-20 | 2.4E-22 | 27389     | dual specificity phosphatase 13                                                |
| Dusp2         | 1.74  | 0.80  | 1.6E-03 | 1.7E-04 | 13537     | dual specificity phosphatase 2                                                 |
| Dusp22        | 1.71  | 0.78  | 2.1E-06 | 9.9E-08 | 105352    | dual specificity phosphatase 22                                                |
| Dusp23        | 2.54  | 1.35  | 3.4E-11 | 8.1E-13 | 68440     | dual specificity phosphatase 23                                                |
| Dusp26        | 5.59  | 2.48  | 5.9E-27 | 3.0E-29 | 66959     | dual specificity phosphatase 26 (putative)                                     |
| Dusp27        | 2.23  | 1.16  | 1.4E-09 | 4.0E-11 | 240892    | dual specificity phosphatase 27 (putative)                                     |
| Dusp28        | 1.86  | 0.90  | 8.6E-05 | 6.1E-06 | 67446     | dual specificity phosphatase 28                                                |
| Dusp3         | 1.83  | 0.87  | 2.4E-08 | 8.4E-10 | 72349     | dual specificity phosphatase 3 (vaccinia virus phosphatase VHI-related)        |
| Dusp7         | 0.62  | -0.69 | 3.6E-04 | 3.9E-05 | 235584    | dual specificity phosphatase 7                                                 |
| Dusp8         | 1.51  | 0.59  | 4.8E-03 | 6.0E-04 | 18218     | dual specificity phosphatase 8                                                 |
| Dusp9         | 0.34  | -1.54 | 2.0E-04 | 1.5E-05 | 75590     | dual specificity phosphatase 9                                                 |
| Dynap         | 0.01  | -6.21 | 4.9E-25 | 3.2E-27 | 75577     | dynaactin associated protein                                                   |
| Dyrk1b        | 2.28  | 1.19  | 5.4E-15 | 8.3E-17 | 13549     | dual-specificity tyrosine-(Y)-phosphorylation regulated kinase 1b              |
| Dyrk2         | 1.54  | 0.62  | 9.2E-05 | 6.5E-06 | 69181     | dual-specificity tyrosine-(Y)-phosphorylation regulated kinase 2               |
| Dzip1         | 0.62  | -0.69 | 1.4E-04 | 1.0E-05 | 66573     | DAZ interacting protein 1                                                      |
| E130012A19Rik | 0.48  | -1.07 | 4.6E-04 | 3.8E-05 | 103551    | RIKEN cDNA E130012A19 gene                                                     |
| E2f6          | 1.59  | 0.67  | 1.1E-06 | 5.1E-08 | 50496     | E2F transcription factor 6                                                     |
| Eci1          | 2.31  | 1.21  | 2.0E-13 | 3.7E-15 | 13177     | enoyl-Coenzyme A delta isomerase 1                                             |
| Eci2          | 1.52  | 0.61  | 2.1E-04 | 1.7E-05 | 23986     | enoyl-Coenzyme A delta isomerase 2                                             |
| Ecm1          | 1.98  | 0.99  | 2.5E-03 | 2.7E-04 | 13601     | extracellular matrix protein 1                                                 |
| Eda2r         | 1.71  | 0.78  | 3.8E-03 | 4.5E-04 | 245527    | ectodysplasin A2 receptor                                                      |
| Ednrb         | 1.57  | 0.65  | 1.5E-04 | 1.1E-05 | 13618     | edurobin receptor type B                                                       |
| Eef1a2        | 19.88 | 4.31  | 9.1E-66 | 2.7E-69 | 13628     | eukaryotic translation elongation factor 1 alpha 2                             |
| Eepd1         | 2.02  | 1.02  | 7.2E-08 | 2.7E-09 | 67484     | endonuclease/exonuclease/phosphatase family domain containing 1                |
| Efcab2        | 1.79  | 0.84  | 1.0E-03 | 9.6E-05 | 68226     | EF-hand calcium binding domain 2                                               |
| Efcab6        | 5.77  | 2.53  | 2.0E-14 | 3.3E-16 | 77627     | EF-hand calcium binding domain 6                                               |
| Efcemp1       | 1.85  | 0.89  | 4.2E-03 | 5.0E-04 | 216616    | epidermal growth factor-containing fibulin-like extracellular matrix protein 1 |
| Efna2         | 0.59  | -0.77 | 1.1E-03 | 1.0E-04 | 13637     | ephrin A2                                                                      |
| Efna3         | 0.22  | -2.19 | 4.3E-05 | 2.8E-06 | 13638     | ephrin A3                                                                      |
| Efna4         | 0.44  | -1.18 | 2.7E-06 | 1.3E-07 | 13639     | ephrin A4                                                                      |
| Efna5         | 0.53  | -0.92 | 4.5E-06 | 2.3E-07 | 13640     | ephrin A5                                                                      |
| Efnb3         | 0.38  | -1.41 | 3.5E-09 | 1.1E-10 | 13643     | ephrin B3                                                                      |
| Egf           | 3.65  | 1.87  | 1.8E-13 | 3.3E-15 | 13645     | epidermal growth factor                                                        |
| Egfbp2        | 5.14  | 2.36  | 2.2E-14 | 3.5E-16 | 13647     | epidermal growth factor binding protein type B                                 |
| Egfl6         | 0.59  | -0.76 | 4.0E-06 | 2.0E-07 | 54156     | EGF-like-domain, multiple 6                                                    |
| Egln3         | 2.05  | 1.03  | 1.2E-09 | 3.3E-11 | 112407    | EGL nine homolog 3                                                             |
| Ehbp111       | 2.06  | 1.06  | 1.7E-09 | 5.1E-11 | 114601    | Eh1 domain binding protein I-like 1                                            |
| Ehd4          | 1.79  | 0.81  | 1.5E-06 | 6.1E-08 | 98878     | Eh1-domain containing 4                                                        |
| Ehhadh        | 1.84  | 0.88  | 1.5E-04 | 1.1E-05 | 74147     | enoyl-Coenzyme A hydratase/3-hydroxyacyl Coenzyme A dehydrogenase              |
| Eif4ebp1      | 1.75  | 0.81  | 3.9E-08 | 1.4E-09 | 13685     | eukaryotic translation initiation factor 4E binding protein 1                  |
| EIF5          | 0.04  | -4.78 | 2.1E-14 | 3.3E-16 | 13711     | E74-like factor 5                                                              |
| Elfn1         | 0.39  | -1.35 | 2.2E-06 | 1.0E-07 | 243312    | leucine rich repeat and fibronectin type III, extracellular 1                  |
| Elov6         | 0.60  | -0.73 | 1.1E-06 | 5.1E-08 | 170439    | ELOVL family member 6, elongation of long chain fatty acids                    |
| Eld1          | 1.95  | 0.96  | 2.0E-06 | 9.4E-08 | 170757    | EGF, latrophilin seven transmembrane domain containing 1                       |
| Emb           | 0.60  | -0.74 | 3.1E-03 | 3.5E-04 | 13723     | embigin                                                                        |
| Emc2          | 1.63  | 0.71  | 2.2E-07 | 8.8E-09 | 66736     | ER membrane protein complex subunit 2                                          |
| Emc9          | 2.69  | 1.43  | 1.6E-08 | 5.5E-10 | 85308     | ER membrane protein complex subunit 9                                          |
| Eme1          | 0.66  | -0.60 | 1.7E-03 | 1.7E-04 | 268465    | essential meiotic endonuclease 1 homolog 1                                     |
| Emid1         | 0.62  | -0.70 | 5.3E-03 | 6.7E-04 | 140703    | EMI domain containing 1                                                        |
| Emilin3       | 0.57  | -0.82 | 2.9E-05 | 1.8E-06 | 280635    | elastin microfibril interfacier 3                                              |
| Emho          | 2.84  | 1.51  | 1.3E-12 | 2.6E-14 | 69638     | energy homeostasis associated                                                  |
| Enk11         | 0.59  | -0.77 | 2.4E-03 | 2.6E-04 | 102124    | enkeirin domain containing 1                                                   |
| Enc3          | 5.91  | 2.56  | 3.3E-35 | 5.9E-38 | 13808     | enolase 3, beta muscle                                                         |
| Enpp2         | 0.63  | -0.66 | 7.1E-03 | 9.5E-04 | 18606     | ectonucleotide pyrophosphatase/phosphodiesterase 2                             |
| Enpp4         | 1.64  | 0.72  | 2.6E-03 | 2.9E-04 | 224794    | ectonucleotide pyrophosphatase/phosphodiesterase 4                             |
| Entpd1        | 1.71  | 0.77  | 9.7E-08 | 3.7E-09 | 12495     | ectonucleoside triphosphate diphosphohydrolase 1                               |
| Entpd2        | 3.39  | 1.76  | 7.5E-22 | 6.1E-24 | 12496     | ectonucleoside triphosphate diphosphohydrolase 2                               |
| Epb4,115      | 0.53  | -0.91 | 1.1E-03 | 1.1E-04 | 226352    | erythrocyte protein band 4.1-like 5                                            |
| Epd1          | 1.81  | 0.85  | 2.0E-06 | 9.3E-08 | 105298    | ependymin related protein 1 (zebrafish)                                        |
| Epha1         | 0.25  | -1.99 | 2.2E-04 | 1.7E-05 | 13835     | Eph receptor A1                                                                |
| Epha7         | 0.52  | -0.94 | 3.8E-04 | 3.1E-05 | 13841     | Eph receptor A7                                                                |
| Epha8         | 0.13  | -2.89 | 2.3E-14 | 3.8E-16 | 13842     | Eph receptor A8                                                                |
| Ephb1         | 0.60  | -0.75 | 5.1E-03 | 6.4E-04 | 270190    | Eph receptor B1                                                                |
| Ephb2         | 0.64  | -0.64 | 4.1E-07 | 1.7E-08 | 13844     | Eph receptor B2                                                                |
| Ephx1         | 2.39  | 1.26  | 1.1E-13 | 1.9E-15 | 13849     | epoxide hydrolase 1, microsomal                                                |
| Ephx2         | 2.68  | 1.38  | 7.6E-05 | 5.3E-06 | 13850     | epoxide hydrolase 2, cytoplasmic                                               |
| Epm2a         | 2.90  | 1.54  | 1.1E-08 | 3.4E-10 | 13853     | epilepsy, progressive myoclonic epilepsy, type 2 gene alpha                    |
| Eps8l2        | 0.33  | -1.61 | 3.4E-03 | 4.0E-04 | 98845     | EPS8-like 2                                                                    |
| Erc2          | 0.47  | -1.08 | 8.1E-04 | 7.5E-05 | 238988    | ELKS/RAB6-interacting/CAST family member 2                                     |
| Erdr1         | 0.18  | -2.44 | 9.4E-04 | 8.9E-05 | 170942    | erythroid differentiation regulator 1                                          |
| Esd           | 1.57  | 0.65  | 4.6E-04 | 3.9E-05 | 13885     | esterase D/formylglutathione hydrolase                                         |
| Esr1          | 2.35  | 1.23  | 3.3E-04 | 2.7E-05 | 13982     | estrogen receptor 1 (alpha)                                                    |
| Esrra         | 2.02  | 1.02  | 1.2E-12 | 2.5E-14 | 26379     | estrogen related receptor, alpha                                               |
| Esrrg         | 3.07  | 1.62  | 2.6E-08 | 9.2E-10 | 26381     | estrogen-related receptor gamma                                                |
| Etf4          | 2.02  | 1.01  | 1.2E-10 | 3.1E-12 | 110842    | electron transferring flavoprotein, alpha polypeptide                          |
| Etfb          | 2.10  | 1.07  | 1.0E-13 | 1.8E-15 | 110826    | electron transferring flavoprotein, beta polypeptide                           |
| Etfdh         | 2.05  | 1.03  | 2.1E-12 | 4.4E-14 | 66841     | electron transferring flavoprotein, dehydrogenase                              |
| Evp1          | 0.18  | -2.43 | 5.8E-04 | 5.1E-05 | 14027     | envoplakin                                                                     |
| Exo1          | 0.62  | -0.68 | 7.4E-04 | 6.7E-05 | 26909     | exonuclease 1                                                                  |
| Exoc6         | 1.94  | 0.95  | 1.3E-06 | 5.9E-08 | 107371    | exocyst complex component 6                                                    |
| Exog          | 0.59  | -0.76 | 2.8E-04 | 2.2E-05 | 208194    | endo/exonuclease (5'-3'), endonuclease G-like                                  |
| Exosc6        | 0.64  | -0.65 | 6.8E-03 | 9.0E-04 | 72544     | exosome component 6                                                            |
| Ext11         | 0.48  | -1.05 | 3.9E-04 | 3.2E-05 | 56219     | exostosin (multiple)-like 1                                                    |
| Eys4          | 1.75  | 0.81  | 1.6E-05 | 9.0E-07 | 14051     | eyes absent 4 homolog                                                          |
| Ezr           | 0.46  | -1.13 | 3.5E-04 | 2.8E-05 | 22350     | ezrin                                                                          |
| F2r11         | 0.56  | -0.84 | 4.8E-04 | 4.0E-05 | 14063     | coagulation factor II (thrombin) receptor-like 1                               |
| Fabp3         | 1.97  | 0.98  | 4.1E-04 | 3.4E-05 | 14077     | fatty acid binding protein 3, muscle and heart                                 |
| Fabp4         | 7.94  | 2.99  | 1.8E-26 | 9.8E-29 | 11770     | fatty acid binding protein 4, adipocyte                                        |
| Fahd1         | 1.63  | 0.71  | 1.5E-03 | 1.5E-04 | 68636     | fumarylacetoacetate hydrolase domain containing 1                              |
| Fam101a       | 0.43  | -1.21 | 4.9E-04 | 4.2E-05 | 73121     | family with sequence similarity 101, member A                                  |
| Fam120c       | 1.67  | 0.74  | 3.5E-06 | 1.8E-07 | 207375    | family with sequence similarity 120C                                           |
| Fam129b       | 0.40  | -1.32 | 1.1E-08 | 3.7E-10 | 227737    | family with sequence similarity 129, member B                                  |
| Fam131a       | 4.88  | 2.29  | 7.5E-45 | 8.1E-48 | 78408     | family with sequence similarity 131, member A                                  |
| Fam134b       | 5.09  | 2.35  | 3.6E-30 | 1.4E-32 | 66270     | family with sequence similarity 134, member B                                  |
| Fam136a       | 1.74  | 0.80  | 4.4E-09 | 1.4E-10 | 66488     | family with sequence similarity 136, member A                                  |
| Fam13a        | 2.28  | 1.19  | 2.9E-09 | 8.8E-11 | 58909     | family with sequence similarity 13, member A                                   |
| Fam151a       | 2.28  | 1.19  | 9.6E-08 | 3.7E-09 | 230579    | family with sequence similarity 151, member A                                  |
| Fam160a1      | 2.23  | 1.16  | 1.0E-15 | 1.4E-17 | 229488    | family with sequence similarity 160, member A1                                 |
| Fam167a       | 0.66  | -0.60 | 1.9E-03 | 2.0E-04 | 219148    | family with sequence similarity 167, member A                                  |
| Fam174b       | 0.67  | -0.59 | 2.9E-03 | 3.3E-04 | 100038347 | family with sequence similarity 174, member B                                  |
| Fam189a1      | 0.34  | -1.54 | 3.8E-07 | 1.6E-08 | 70638     | family with sequence similarity 189, member A1                                 |
| Fam189a2      | 3.15  | 1.66  | 2.3E-21 | 1.9E-23 | 381217    | family with sequence similarity 189, member A2                                 |
| Fam195a       | 3.01  | 1.59  | 1.2E-10 | 3.0E-12 | 68241     | family with sequence similarity 195, member A                                  |



|               |      |        |          |          |           |                                                                                    |
|---------------|------|--------|----------|----------|-----------|------------------------------------------------------------------------------------|
| Fam210a       | 1.72 | 0.78   | 5.4E-07  | 2.3E-08  | 108654    | family with sequence similarity 210, member A                                      |
| Fam212b       | 1.56 | 0.64   | 4.3E-04  | 3.6E-05  | 109050    | family with sequence similarity 212, member B                                      |
| Fam213b       | 1.62 | 0.70   | 2.3E-04  | 1.8E-05  | 66469     | family with sequence similarity 213, member B                                      |
| Fam214a       | 1.81 | 0.86   | 1.6E-03  | 1.6E-04  | 235493    | family with sequence similarity 214, member A                                      |
| Fam49b        | 1.90 | 0.92   | 7.1E-10  | 2.0E-11  | 223601    | family with sequence similarity 49, member B                                       |
| Fam57a        | 0.44 | -1.17  | 4.5E-04  | 3.8E-05  | 116972    | family with sequence similarity 57, member A                                       |
| Fam9c         | 1.82 | 0.87   | 1.4E-03  | 1.5E-04  | 240479    | family with sequence similarity 09, member C                                       |
| Fam83b        | 0.26 | -1.04  | 3.8E-03  | 4.5E-04  | 485732    | family with sequence similarity 83, member H                                       |
| Fam84a        | 0.28 | -1.86  | 9.8E-07  | 4.4E-08  | 105005    | family with sequence similarity 84, member A                                       |
| Fam96b        | 1.60 | 0.68   | 3.0E-05  | 1.8E-06  | 68523     | family with sequence similarity 96, member B                                       |
| Fanca         | 0.63 | -0.67  | 4.8E-04  | 4.1E-05  | 14087     | Fanconi anemia, complementation group A                                            |
| Fancb         | 0.58 | -0.78  | 4.0E-03  | 4.8E-04  | 237211    | Fanconi anemia, complementation group B                                            |
| Fap           | 1.59 | 0.67   | 7.6E-06  | 4.1E-07  | 14089     | fibroblast activation protein                                                      |
| Fasn          | 0.59 | -0.76  | 2.9E-06  | 1.4E-07  | 14104     | fatty acid synthase                                                                |
| Fastkd1       | 1.72 | 0.78   | 2.0E-04  | 1.5E-05  | 320720    | FAST kinase domains 1                                                              |
| Fbp2          | 5.30 | 2.41   | 1.3E-20  | 1.2E-22  | 14120     | fructose biphosphatase 2                                                           |
| Fbxl19        | 0.53 | -0.91  | 2.1E-08  | 7.2E-10  | 233902    | F-box and leucine-rich repeat protein 19                                           |
| Fbxl22        | 2.71 | 1.44   | 6.3E-15  | 9.7E-17  | 74165     | F-box and leucine-rich repeat protein 22                                           |
| Fbxo1         | 2.06 | 1.04   | 2.8E-16  | 3.7E-18  | 76454     | F-box protein 31                                                                   |
| Fbxo32        | 1.99 | 0.99   | 7.1E-07  | 3.1E-08  | 67731     | F-box protein 32                                                                   |
| Fbxo40        | 3.48 | 1.80   | 2.8E-12  | 6.1E-14  | 207215    | F-box protein 40                                                                   |
| Fcgr2b        | 2.73 | 1.45   | 1.2E-09  | 3.5E-11  | 14130     | Fc receptor, IgG, low affinity IIb                                                 |
| Fcna          | 2.65 | 1.40   | 4.0E-07  | 1.7E-08  | 14133     | ficoidin A                                                                         |
| Fem1a         | 2.39 | 1.26   | 1.3E-17  | 1.6E-19  | 14154     | feminization 1 homolog a                                                           |
| Fem1c         | 1.54 | 0.62   | 4.7E-06  | 2.4E-07  | 240263    | fem-1 homolog c                                                                    |
| Fermt2        | 1.97 | 0.98   | 4.5E-11  | 1.1E-12  | 218952    | fermitin family homolog 2                                                          |
| Fetub         | 0.09 | -3.45  | 1.9E-12  | 3.9E-14  | 59083     | fetuin beta                                                                        |
| Fgf1          | 1.75 | 0.81   | 5.4E-04  | 4.7E-05  | 14164     | fibroblast growth factor 1                                                         |
| Fgf13         | 1.56 | 0.64   | 3.0E-04  | 2.4E-05  | 14168     | fibroblast growth factor 13                                                        |
| Fgf16         | 2.04 | 1.03   | 7.3E-04  | 6.6E-05  | 80903     | fibroblast growth factor 16                                                        |
| Fgfr2         | 0.50 | -0.99  | 6.1E-06  | 3.2E-07  | 14183     | fibroblast growth factor receptor 2                                                |
| Fgfr3         | 0.42 | -1.24  | 3.2E-06  | 1.6E-07  | 14184     | fibroblast growth factor receptor 3                                                |
| Fgfr11        | 2.48 | 1.31   | 6.1E-19  | 6.2E-21  | 116701    | fibroblast growth factor receptor-like 1                                           |
| Fggy          | 1.73 | 0.79   | 1.3E-03  | 1.2E-04  | 75578     | FGGY carbohydrate kinase domain containing                                         |
| Fgl2          | 1.80 | 0.85   | 3.2E-03  | 3.6E-04  | 14190     | fibrinogen-like protein 2                                                          |
| Fhl1          | 1.82 | 0.86   | 1.3E-10  | 3.5E-12  | 14194     | fumarate hydratase 1                                                               |
| Fhl11         | 4.01 | 2.00   | 7.9E-26  | 4.8E-28  | 14199     | four and a half LIM domains 1                                                      |
| Fhl3          | 1.91 | 0.93   | 2.8E-11  | 6.5E-13  | 14201     | four and a half LIM domains 3                                                      |
| Filip1        | 2.01 | 1.01   | 1.1E-09  | 3.2E-11  | 70598     | filamin A interacting protein 1                                                    |
| Fitm1         | 3.18 | 1.67   | 3.8E-28  | 1.7E-30  | 68680     | fat storage-inducing transmembrane protein 1                                       |
| Fjx1          | 0.61 | -0.72  | 8.3E-04  | 7.6E-05  | 14221     | four jointed box 1                                                                 |
| Fkbp3         | 1.53 | 0.62   | 7.7E-05  | 5.3E-06  | 30795     | FK506 binding protein 3                                                            |
| Flna          | 1.82 | 0.87   | 8.2E-07  | 3.6E-08  | 68794     | filamin C, gamma                                                                   |
| Flot1         | 1.69 | 0.75   | 3.4E-07  | 1.4E-08  | 14251     | flotillin 1                                                                        |
| Flot2         | 1.62 | 0.70   | 2.2E-07  | 8.6E-09  | 14252     | flotillin 2                                                                        |
| Flrt3         | 0.57 | -0.82  | 3.6E-05  | 2.3E-06  | 71436     | fibronectin leucine rich transmembrane protein 3                                   |
| Flt1          | 1.69 | 0.75   | 2.7E-08  | 9.3E-10  | 14254     | FMS-like tyrosine kinase 1                                                         |
| Fmo1          | 1.95 | 0.96   | 2.7E-11  | 6.5E-13  | 14261     | flavin containing monooxygenase 1                                                  |
| Fn3k          | 4.59 | 2.20   | 7.6E-18  | 8.5E-20  | 63828     | fructosamine 3 kinase                                                              |
| Fnde3c1       | 1.72 | 0.78   | 4.4E-05  | 2.9E-06  | 333564    | fibronectin type III domain containing 3C1                                         |
| Fnde4         | 0.61 | -0.72  | 7.7E-06  | 4.2E-07  | 64339     | fibronectin type III domain containing 4                                           |
| Fnlr2         | 2.07 | 1.05   | 2.4E-04  | 1.8E-05  | 14276     | folate receptor 2 (fetal)                                                          |
| Foxp4         | 0.58 | -0.78  | 7.5E-07  | 3.3E-08  | 74123     | forkhead box P4                                                                    |
| Foxq1         | 0.02 | -5.45  | 1.5E-20  | 1.3E-22  | 15220     | forkhead box O1                                                                    |
| Foxred2       | 0.56 | -0.85  | 1.1E-03  | 1.1E-04  | 239554    | FAD-dependent oxidoreductase domain containing 2                                   |
| Frem1         | 0.66 | -0.60  | 3.8E-03  | 4.5E-04  | 329872    | Fras1 related extracellular matrix protein 1                                       |
| Fry           | 2.14 | 1.10   | 1.1E-14  | 1.7E-16  | 320365    | furry homolog                                                                      |
| Frzb          | 1.60 | 0.67   | 4.9E-05  | 3.2E-06  | 20378     | frizzled-related protein                                                           |
| Fsd11         | 1.66 | 0.73   | 2.7E-04  | 2.1E-05  | 319636    | fibronectin type III and SPRY domain containing 1-like                             |
| Fsd2          | 4.39 | 2.13   | 1.7E-26  | 9.4E-29  | 244091    | fibronectin type III and SPRY domain containing 2                                  |
| Fth1          | 1.68 | 0.75   | 3.4E-08  | 1.2E-09  | 14319     | ferritin heavy chain 1                                                             |
| Fundc2        | 1.72 | 0.78   | 6.0E-08  | 2.2E-09  | 67391     | FUN14 domain containing 2                                                          |
| Fxr1          | 1.76 | 0.82   | 9.1E-07  | 4.0E-08  | 14359     | fragile X mental retardation gene 1, autosomal homolog                             |
| Fxyd1         | 3.23 | 1.69   | 5.5E-27  | 2.8E-29  | 56188     | FXYD domain-containing ion transport regulator 1                                   |
| Fycv1         | 2.14 | 1.10   | 4.9E-16  | 6.3E-18  | 17281     | FYVE and coiled-coil domain containing 1                                           |
| Fyz3          | 0.60 | -0.73  | 8.3E-05  | 5.8E-06  | 14365     | frizzled homolog 3                                                                 |
| Gbc2          | 2.75 | 1.46   | 8.0E-15  | 1.2E-16  | 14373     | G0/G1 switch gene 2                                                                |
| G630090E17Rik | 2.49 | 1.31   | 1.5E-05  | 8.5E-07  | 100041085 | RIKEN cDNA G630090E17 gene                                                         |
| G6pdx         | 0.55 | -0.85  | 7.3E-05  | 5.1E-06  | 14381     | glucose-6-phosphate dehydrogenase X-linked                                         |
| Gadd45a       | 1.64 | 0.71   | 2.6E-03  | 2.9E-04  | 13197     | growth arrest and DNA-damage-inducible 45 alpha                                    |
| Gadd45gip1    | 1.57 | 0.65   | 2.3E-05  | 1.4E-06  | 102060    | growth arrest and DNA-damage-inducible, gamma interacting protein 1                |
| Gad11         | 2.77 | 1.47   | 2.2E-07  | 8.8E-09  | 73748     | glutamate decarboxylase-like 1                                                     |
| Gale          | 0.58 | -0.78  | 4.2E-04  | 3.5E-05  | 74246     | galactose-4-epimerase, UDP                                                         |
| Galm          | 1.79 | 0.84   | 7.4E-06  | 4.0E-07  | 319625    | galactose mutarotase                                                               |
| Galnt3        | 0.53 | -0.93  | 7.0E-03  | 9.3E-04  | 14425     | UDP-N-acetyl-alpha-D-galactosamine:polypeptide N-acetylgalactosaminyltransferase 3 |
| Galt          | 1.79 | 0.84   | 1.4E-05  | 7.7E-07  | 14430     | galactose-1-phosphate uridylyl transferase                                         |
| Gamt          | 2.62 | 1.39   | 1.3E-15  | 1.9E-17  | 14431     | guanidinoacetate methyltransferase                                                 |
| Ganc          | 1.71 | 0.77   | 3.0E-04  | 2.4E-05  | 76051     | glucosidase, alpha; neutral C                                                      |
| Gas2          | 0.46 | -1.13  | 2.5E-05  | 1.5E-06  | 14453     | growth arrest specific 2                                                           |
| Gas6          | 1.96 | 0.97   | 1.5E-11  | 3.5E-13  | 14456     | growth arrest specific 6                                                           |
| Gata6         | 2.01 | 1.01   | 5.7E-03  | 7.3E-04  | 14465     | GATA binding protein 6                                                             |
| Gatm          | 2.62 | 1.39   | 5.6E-13  | 1.1E-14  | 67092     | glycine amidinotransferase (L-arginine:glycine amidinotransferase)                 |
| Gatsl2        | 2.38 | 1.25   | 1.0E-13  | 1.9E-15  | 80909     | GATS protein-like 2                                                                |
| Gbas          | 2.68 | 1.42   | 3.4E-22  | 2.6E-24  | 14467     | glioblastoma amplified sequence                                                    |
| Gbe1          | 3.31 | 1.73   | 1.8E-19  | 1.8E-21  | 74185     | glucan (1,4-alpha)-, branching enzyme 1                                            |
| Gbp2          | 2.38 | 1.25   | 1.5E-03  | 1.6E-04  | 14469     | guanylate binding protein 2                                                        |
| Gbp3          | 2.50 | 1.32   | 7.6E-05  | 5.3E-06  | 55932     | guanylate binding protein 3                                                        |
| Gbp7          | 1.87 | 0.90   | 2.6E-04  | 2.0E-05  | 229900    | guanylate binding protein 7                                                        |
| Gbp9          | 1.67 | 0.74   | 2.7E-03  | 3.1E-04  | 236573    | guanylate-binding protein 9                                                        |
| Gch1          | 2.37 | 1.24   | 7.0E-06  | 3.8E-07  | 14528     | GTP cyclohydrolase 1                                                               |
| Gdf1          | 1.58 | 0.66   | 9.3E-04  | 8.8E-05  | 14559     | growth differentiation factor 1                                                    |
| Gdf10         | 0.64 | -0.65  | 8.2E-04  | 7.5E-05  | 14560     | growth differentiation factor 10                                                   |
| Gdf5          | 0.22 | -2.16  | 9.5E-06  | 5.2E-07  | 14563     | growth differentiation factor 5                                                    |
| Gdf6          | 0.25 | -1.53  | 2.9E-04  | 2.3E-05  | 242316    | growth differentiation factor 6                                                    |
| Gemin4        | 0.63 | -0.63  | 1.3E-04  | 9.8E-06  | 276919    | gem (nuclear organelle) associated protein 4                                       |
| Gfra1         | 0.65 | -0.63  | 1.1E-03  | 1.1E-04  | 14585     | glial cell line derived neurotrophic factor family receptor alpha 1                |
| Ggt5          | 2.30 | 1.20   | 3.0E-08  | 1.1E-09  | 23887     | gamma-glutamyltransferase 5                                                        |
| Ghitm         | 1.66 | 0.73   | 3.9E-07  | 1.6E-08  | 66092     | growth hormone inducible transmembrane protein                                     |
| Gimap8        | 1.75 | 0.81   | 1.3E-03  | 1.3E-04  | 243374    | GTPase, IMAP family member 8                                                       |
| Gins1         | 0.61 | -0.70  | 4.1E-03  | 4.9E-04  | 69270     | GINS complex subunit 1 (PsfI homolog)                                              |
| Gins3         | 0.60 | -0.73  | 1.5E-03  | 1.6E-04  | 78833     | GINS complex subunit 3 (PsfI homolog)                                              |
| Gipr          | 4.75 | 2.25   | 1.7E-14  | 2.7E-16  | 381853    | gastric inhibitory polypeptide receptor                                            |
| Gja1          | 0.54 | -0.88  | 2.8E-05  | 1.7E-06  | 14609     | gap junction protein, alpha 1                                                      |
| Gja3          | 2.13 | 1.09   | 7.4E-07  | 3.2E-08  | 14611     | gap junction protein, alpha 3                                                      |
| Gjc3          | 2.65 | 1.40   | 1.5E-06  | 6.9E-08  | 118446    | gap junction protein, gamma 3                                                      |
| Gjd4          | 1.61 | 0.69   | 6.0E-03  | 7.8E-04  | 225152    | gap junction protein, delta 4                                                      |
| Gld           | 0.13 | -2.97  | 4.4E-06  | 2.3E-07  | 104174    | glycine decarboxylase                                                              |
| Gld3hd2       | 1.96 | 0.97   | 6.7E-05  | 4.6E-06  | 320302    | glycine transferase 28 domain containing 2                                         |
| Gli1          | 1.83 | 0.87   | 9.2E-10  | 2.6E-11  | 14645     | glutamate-ammonia ligase (glutamine synthetase)                                    |
| Gm1149        | 1.83 | 0.87   | 9.8E-05  | 7.0E-06  | 100036537 | predicted gene 11149                                                               |
| Gm11201       | 1.65 | 0.72   | 5.4E-03  | 6.9E-04  | 790910    | predicted gene 11201                                                               |
| Gm13031       | 2.52 | 1.34   | 1.6E-05  | 9.2E-07  | 100126227 | predicted gene 13031                                                               |
| Gm13889       | 2.31 | 1.21   | 1.1E-08  | 3.4E-10  | 620695    | predicted gene 13889                                                               |
| Gm1987        | 0.55 | -0.86  | 6.8E-03  | 8.9E-04  | 100504362 | predicted gene 1987                                                                |
| Gm20741       | 0.00 | -10.40 | 4.6E-128 | 6.1E-132 | 433047    | predicted gene 20741                                                               |
| Gm21949       | 2.50 | 1.32   | 4.1E-14  | 7.0E-16  | 100505386 | predicted gene 21949                                                               |
| Gm44502       | 4.89 | 2.29   | 5.7E-54  | 2.6E-57  | 100134861 | predicted readthrough transcript (NMD candidate) 44502                             |
| Gm4814        | 7.96 | 2.99   | 1.9E-26  | 1.1E-28  | 100502942 | predicted gene 4814                                                                |
| Gm4980        | 4.19 | 2.07   | 2.9E-20  | 2.6E-22  | 100503386 | predicted gene 4980                                                                |
| Gm5105        | 2.66 | 1.41   | 2.1E-07  | 8.5E-09  | 329763    | predicted gene 5105                                                                |
| Gm5111        | 5.21 | 2.38   | 5.1E-14  | 8.7E-16  | 330305    | predicted gene 5111                                                                |
| Gm5483        | 8.46 | 3.08   | 1.0E-13  | 1.8E-15  | 433016    | predicted gene 5483                                                                |
| Gm572         | 2.41 | 1.27   | 7.5E-05  | 5.2E-06  | 230909    | predicted gene 572                                                                 |
| Gm6307        | 2.06 | 1.04   | 2.3E-04  | 1.8E-05  | 622283    | predicted gene 6307                                                                |
| Gm7120        | 0.19 | -2.41  | 2.2E-13  | 4.1E-15  | 633640    | predicted gene 7120                                                                |
| Gmppb         | 0.65 | -0.63  | 1.2E-03  | 1.1E-04  | 331026    | GDP-mannose pyrophosphorylase B                                                    |
| Gmpr          | 2.50 | 1.32   | 2.0E-15  | 3.0E-17  | 66355     | guanosine monophosphate reductase                                                  |
| Gng4          | 0.24 | -2.03  | 1.0E-03  | 9.7E-05  | 14706     | guanine nucleotide binding protein (G protein), gamma 4                            |
| Got1          | 2.57 | 1.36   | 1.2E-18  | 1.3E-20  | 14718     | glutamate oxaloacetate transaminase 1, soluble                                     |
| Got2          | 1.88 | 0.91   | 3.4E-11  | 8.2E-13  | 14719     | glutamate oxaloacetate transaminase 2, mitochondrial                               |
| Gp1bb         | 0.49 | -1.02  | 1.6E-05  | 9.0E-07  | 14724     | glycoprotein Ib, beta polypeptide                                                  |

|           |       |       |         |         |          |                                                                                                                                       |
|-----------|-------|-------|---------|---------|----------|---------------------------------------------------------------------------------------------------------------------------------------|
| Gpc2      | 0.50  | -1.00 | 5.1E-05 | 3.4E-06 | 71951    | glypican 2 (cerebroglycan)                                                                                                            |
| Gpd1      | 45.28 | 5.50  | 2.1E-33 | 5.4E-36 | 14555    | glycerol-3-phosphate dehydrogenase 1 (soluble)                                                                                        |
| Gpd1l     | 1.73  | 0.79  | 5.4E-09 | 1.7E-10 | 333433   | glycerol-3-phosphate dehydrogenase 1-like                                                                                             |
| Gpi1      | 1.74  | 0.80  | 3.4E-09 | 1.0E-10 | 14751    | glucose phosphate isomerase 1                                                                                                         |
| Gpihbp1   | 2.23  | 1.16  | 1.1E-09 | 3.1E-11 | 68453    | GPI-anchored HDL-binding protein 1                                                                                                    |
| Gpr116    | 1.92  | 0.94  | 7.0E-12 | 1.6E-13 | 224792   | G protein-coupled receptor 116                                                                                                        |
| Gpr146    | 2.58  | 1.37  | 5.2E-10 | 1.4E-11 | 80290    | G protein-coupled receptor 146                                                                                                        |
| Gpr157    | 2.12  | 1.27  | 6.0E-17 | 7.4E-19 | 269604   | G protein-coupled receptor 157                                                                                                        |
| Gpr160    | 0.42  | -1.26 | 4.3E-03 | 5.2E-04 | 71862    | G protein-coupled receptor 160                                                                                                        |
| Gpr27     | 0.51  | -0.98 | 2.0E-03 | 2.1E-04 | 14761    | G protein-coupled receptor 27                                                                                                         |
| Gpr88     | 0.11  | -3.22 | 5.2E-16 | 7.1E-18 | 64378    | G-protein coupled receptor 88                                                                                                         |
| Gprc5a    | 0.38  | -1.40 | 1.3E-08 | 4.3E-10 | 232431   | G protein-coupled receptor, family C, group 5, member A                                                                               |
| Gprc5c    | 1.52  | 0.61  | 1.5E-03 | 1.5E-04 | 70355    | G protein-coupled receptor, family C, group 5, member C                                                                               |
| Gprin2    | 0.29  | -1.79 | 5.6E-03 | 7.2E-04 | 432839   | G protein regulated inducer of neurite outgrowth 2                                                                                    |
| Gpt       | 2.22  | 1.15  | 3.6E-04 | 2.9E-05 | 76282    | glutamic pyruvic transaminase, soluble                                                                                                |
| Gpx3      | 0.09  | -3.47 | 7.9E-47 | 7.5E-50 | 14778    | glutathione peroxidase 3                                                                                                              |
| Gramd1b   | 1.55  | 0.64  | 4.3E-03 | 5.1E-04 | 235283   | GRAM domain containing 1B                                                                                                             |
| Grb14     | 2.25  | 1.17  | 2.1E-06 | 9.8E-08 | 50915    | growth factor receptor bound protein 14                                                                                               |
| Grem1     | 0.46  | -1.13 | 1.9E-03 | 2.0E-04 | 23892    | gremlin 1                                                                                                                             |
| Grih1     | 0.24  | -2.05 | 5.6E-03 | 7.2E-04 | 195733   | grainyhead-like 1                                                                                                                     |
| Gria1     | 0.45  | -1.15 | 3.7E-03 | 4.4E-04 | 14799    | glutamate receptor, ionotropic, AMPA1 (alpha 1)                                                                                       |
| Grik3     | 0.22  | -2.19 | 1.8E-08 | 5.9E-10 | 14807    | glutamate receptor, ionotropic, kainate 3                                                                                             |
| Grima     | 1.52  | 0.60  | 2.0E-05 | 1.2E-06 | 66168    | glutamate receptor, ionotropic, N-methyl D-aspartate-associated protein 1 (glutamate binding)                                         |
| Grip1     | 0.59  | -0.75 | 2.1E-03 | 2.2E-04 | 74053    | glutamate receptor interacting protein 1                                                                                              |
| Grip2     | 1.97  | 0.98  | 8.4E-08 | 3.2E-09 | 243547   | glutamate receptor interacting protein 2                                                                                              |
| Gsap      | 1.67  | 0.74  | 6.7E-03 | 8.8E-04 | 212167   | gamma-secretase activating protein                                                                                                    |
| Gsn       | 1.58  | 0.66  | 4.2E-06 | 2.1E-07 | 227753   | gelsolin                                                                                                                              |
| Gsta4     | 0.28  | -1.85 | 4.2E-09 | 1.3E-10 | 14860    | glutathione S-transferase, alpha 4                                                                                                    |
| Gstm1     | 1.90  | 0.92  | 1.9E-06 | 9.1E-08 | 14862    | glutathione S-transferase, mu 1                                                                                                       |
| Gstt3     | 0.52  | -0.93 | 2.4E-04 | 1.9E-05 | 103140   | glutathione S-transferase, theta 3                                                                                                    |
| Gstz1     | 1.53  | 0.62  | 9.7E-05 | 6.9E-06 | 14874    | glutathione transferase zeta 1 (methylacetoacetate isomerase)                                                                         |
| Gtse1     | 0.66  | -0.61 | 1.9E-03 | 2.0E-04 | 29870    | G two S phase expressed protein 1                                                                                                     |
| Gyg       | 2.18  | 1.13  | 6.6E-17 | 8.1E-19 | 27357    | glycogenin                                                                                                                            |
| Gyhl1b    | 0.26  | -1.94 | 8.0E-04 | 7.3E-05 | 228366   | glycosyltransferase-like 1B                                                                                                           |
| Gys1      | 2.42  | 1.27  | 6.6E-20 | 6.0E-22 | 14936    | glycogen synthase 1, muscle                                                                                                           |
| H19       | 1.95  | 0.96  | 4.3E-12 | 9.5E-14 | 14955    | H19 fetal liver mRNA                                                                                                                  |
| H2-Eh1    | 1.96  | 0.97  | 6.7E-03 | 2.8E-05 | 14969    | histocompatibility 2, class II antigen E beta                                                                                         |
| H2afy2    | 0.56  | -0.84 | 3.5E-09 | 1.1E-10 | 404634   | H2A histone family, member Y2                                                                                                         |
| H2afy3    | 0.57  | -0.81 | 1.5E-03 | 1.5E-04 | 67552    | H2A histone family, member Y3                                                                                                         |
| Hadh      | 1.89  | 0.92  | 2.7E-09 | 8.2E-11 | 15107    | hydroxyacyl-Coenzyme A dehydrogenase                                                                                                  |
| Hadha     | 1.77  | 0.82  | 4.0E-09 | 1.2E-10 | 97212    | hydroxyacyl-Coenzyme A dehydrogenase/3-ketoacyl-Coenzyme A thiolase/enoyl-Coenzyme A hydratase (trifunctional protein), alpha subunit |
| Hadhb     | 1.72  | 0.78  | 3.0E-04 | 2.4E-05 | 231086   | hydroxyacyl-Coenzyme A dehydrogenase/3-ketoacyl-Coenzyme A thiolase/enoyl-Coenzyme A hydratase (trifunctional protein), beta subunit  |
| Hagh      | 1.66  | 0.73  | 1.5E-04 | 1.1E-05 | 14651    | hydroxyacyl glutathione hydrolase                                                                                                     |
| Hand2     | 0.32  | -1.64 | 1.3E-05 | 7.3E-07 | 15111    | heart and neural crest derivatives expressed transcript 2                                                                             |
| Hba-x     | 0.17  | -2.56 | 7.7E-16 | 1.1E-17 | 15126    | hemoglobin X, alpha-like embryonic chain in Hba complex                                                                               |
| Hbb-y     | 0.18  | -2.49 | 9.8E-13 | 2.0E-14 | 15135    | hemoglobin Y, beta-like embryonic chain                                                                                               |
| Hcfc1r1   | 2.08  | 1.06  | 2.3E-13 | 4.3E-15 | 353502   | host cell factor C1 regulator 1 (XPO1-dependent)                                                                                      |
| Hdac9     | 1.72  | 0.78  | 6.7E-05 | 4.6E-06 | 79221    | histone deacetylase 9                                                                                                                 |
| Hdgfrp3   | 2.08  | 1.06  | 7.5E-12 | 1.7E-13 | 29877    | hepatoma-derived growth factor, related protein 3                                                                                     |
| Hcttr1    | 0.64  | -0.64 | 4.7E-05 | 3.1E-06 | 217995   | HEAT repeat containing 1                                                                                                              |
| Hectd2    | 1.68  | 0.75  | 3.4E-04 | 2.8E-05 | 226098   | HECT domain containing 2                                                                                                              |
| Hecr3     | 3.10  | 1.63  | 2.4E-21 | 2.0E-23 | 73998    | hect domain and RLD 3                                                                                                                 |
| Hfc       | 1.69  | 0.76  | 2.3E-03 | 2.5E-04 | 15216    | hemochromatosis                                                                                                                       |
| Hfc2      | 2.22  | 1.15  | 3.7E-11 | 8.8E-13 | 69585    | hemochromatosis type 2 (juvenile)                                                                                                     |
| Hhat1     | 4.19  | 2.07  | 5.5E-26 | 3.3E-28 | 74770    | hedgchog acyltransferase-like                                                                                                         |
| Hibadh    | 1.87  | 0.90  | 3.7E-10 | 1.0E-11 | 58875    | 3-hydroxyisobutyrate dehydrogenase                                                                                                    |
| Hibch     | 1.65  | 0.72  | 8.9E-04 | 8.3E-05 | 227095   | 3-hydroxyisobutyryl-Coenzyme A hydrolase                                                                                              |
| Hif1an    | 1.77  | 0.82  | 3.9E-09 | 1.2E-10 | 319594   | hypoxia-inducible factor 1, alpha subunit inhibitor                                                                                   |
| Hif3a     | 1.63  | 0.71  | 1.7E-06 | 7.9E-08 | 53417    | hypoxia inducible factor 3, alpha subunit                                                                                             |
| Higd2a    | 1.52  | 0.61  | 1.5E-04 | 1.1E-05 | 67044    | HIG1 domain family, member 2A                                                                                                         |
| Hik1      | 2.63  | 1.40  | 1.8E-05 | 1.1E-06 | 54388    | histone H1-like protein in spermatids 1                                                                                               |
| Hint2     | 2.33  | 1.22  | 6.3E-07 | 2.7E-08 | 68917    | histidine triad nucleotide binding protein 2                                                                                          |
| Hint3     | 1.69  | 0.76  | 3.4E-03 | 3.9E-04 | 66847    | histidine triad nucleotide binding protein 3                                                                                          |
| Hip1      | 1.73  | 0.79  | 6.4E-07 | 2.8E-08 | 215114   | huntingtin interacting protein 1                                                                                                      |
| Hist1hc   | 2.25  | 1.17  | 3.4E-10 | 9.1E-12 | 50708    | histone cluster 1, H1c                                                                                                                |
| Hist1h2bc | 2.25  | 1.17  | 5.2E-09 | 1.6E-10 | 68024    | histone cluster 1, H2bc                                                                                                               |
| Hl2       | 1.88  | 0.91  | 6.4E-11 | 1.6E-12 | 15277    | hexokinase 2                                                                                                                          |
| Hmcn1     | 0.64  | -0.64 | 4.2E-03 | 5.0E-04 | 545370   | hemicentin 1                                                                                                                          |
| Hmga2     | 0.58  | -0.79 | 3.6E-07 | 1.5E-08 | 15364    | high mobility group AT-hook 2                                                                                                         |
| Hn1       | 0.59  | -0.75 | 2.2E-08 | 7.5E-10 | 52009    | hematological and neurological expressed 1-like                                                                                       |
| Homer1    | 1.61  | 0.68  | 8.9E-04 | 8.3E-05 | 26556    | homer homolog 1                                                                                                                       |
| Hoxa3     | 1.64  | 0.72  | 7.1E-03 | 9.6E-04 | 15400    | homeobox A3                                                                                                                           |
| Hoxa4     | 2.95  | 1.56  | 7.1E-08 | 2.7E-09 | 15401    | homeobox A4                                                                                                                           |
| Hoxa5     | 2.22  | 1.15  | 1.4E-04 | 9.9E-06 | 15402    | homeobox A5                                                                                                                           |
| Hoxa7     | 1.71  | 0.78  | 2.6E-03 | 2.9E-04 | 15404    | homeobox A7                                                                                                                           |
| Hoxb4     | 2.37  | 1.24  | 5.2E-04 | 4.5E-05 | 15412    | homeobox B4                                                                                                                           |
| Hoxd10    | 0.42  | -1.25 | 3.2E-03 | 3.7E-04 | 15430    | homeobox D10                                                                                                                          |
| Hoxd11    | 0.34  | -1.56 | 8.8E-04 | 8.2E-05 | 15431    | homeobox D11                                                                                                                          |
| Hp        | 2.51  | 1.33  | 9.7E-04 | 9.2E-05 | 15439    | haptoglobin                                                                                                                           |
| Hpsc2     | 0.45  | -1.16 | 1.6E-03 | 1.7E-04 | 545291   | heparanase 2                                                                                                                          |
| Hras      | 4.99  | 2.32  | 1.9E-12 | 4.0E-14 | 27281    | HRAS-like suppressor                                                                                                                  |
| Hrc       | 3.35  | 1.74  | 4.7E-22 | 3.7E-24 | 15464    | histidine rich calcium binding protein                                                                                                |
| Hsd11b2   | 2.56  | 1.36  | 3.4E-07 | 1.4E-08 | 15484    | hydroxysteroid 11-beta dehydrogenase 2                                                                                                |
| Hsd17b7   | 0.55  | -0.86 | 2.1E-04 | 1.6E-05 | 15490    | hydroxysteroid (17-beta) dehydrogenase 7                                                                                              |
| Hsd12     | 1.55  | 0.63  | 3.4E-03 | 3.9E-04 | 72479    | hydroxysteroid dehydrogenase like 2                                                                                                   |
| Hst2      | 1.55  | 0.63  | 3.0E-04 | 2.4E-05 | 15500    | heat shock factor 2                                                                                                                   |
| Hst2bp    | 3.13  | 1.64  | 1.6E-09 | 4.8E-11 | 74377    | heat shock transcription factor 2 binding protein                                                                                     |
| Hspa12a   | 1.53  | 0.62  | 6.9E-03 | 9.1E-04 | 73442    | heat shock protein 12A                                                                                                                |
| Hspa1a    | 0.32  | -1.66 | 3.8E-04 | 3.1E-05 | 193740   | heat shock protein 1A                                                                                                                 |
| Hspa1b    | 0.23  | -2.12 | 7.9E-05 | 5.6E-06 | 15511    | heat shock protein 1B                                                                                                                 |
| Hspa1l    | 1.71  | 0.78  | 4.1E-03 | 4.9E-04 | 15482    | heat shock protein 1-like                                                                                                             |
| Hspa5     | 0.59  | 0.77  | 4.7E-06 | 2.4E-07 | 14828    | heat shock protein 5                                                                                                                  |
| Hspb2     | 1.67  | 0.74  | 3.1E-05 | 1.9E-06 | 69253    | heat shock protein 2                                                                                                                  |
| Hspb3     | 2.39  | 1.26  | 1.3E-09 | 3.9E-11 | 56534    | heat shock protein 3                                                                                                                  |
| Hspb6     | 5.85  | 2.65  | 7.6E-48 | 6.7E-51 | 243912   | heat shock protein, alpha-crystallin-related, B6                                                                                      |
| Hspb7     | 4.62  | 2.21  | 4.6E-21 | 4.0E-23 | 29818    | heat shock protein family, member 7 (cardiovascular)                                                                                  |
| Hspb8     | 2.84  | 1.51  | 4.1E-18 | 4.5E-20 | 80888    | heat shock protein 8                                                                                                                  |
| Hunk      | 0.55  | -0.86 | 1.8E-08 | 6.2E-10 | 26559    | horizontally upregulated Neu-associated kinase                                                                                        |
| Hydin     | 4.43  | 2.15  | 1.8E-10 | 4.8E-12 | 244653   | HYDIN, axonemal central pair apparatus protein                                                                                        |
| Hyon1     | 0.52  | -0.95 | 4.0E-13 | 7.7E-15 | 12282    | hypoxia up-regulated 1                                                                                                                |
| Idb2      | 1.59  | 0.67  | 2.7E-06 | 1.3E-07 | 269951   | isocitrate dehydrogenase 2 (NADP+), mitochondrial                                                                                     |
| Idb3a     | 3.50  | 1.81  | 1.9E-29 | 7.7E-32 | 67834    | isocitrate dehydrogenase 3 (NAD+) alpha                                                                                               |
| Idb3b     | 1.90  | 0.93  | 5.3E-12 | 1.2E-13 | 170718   | isocitrate dehydrogenase 3 (NAD+) beta                                                                                                |
| Idb3g     | 1.77  | 0.82  | 1.4E-09 | 4.1E-11 | 15929    | isocitrate dehydrogenase 3 (NAD+), gamma                                                                                              |
| Ier3      | 2.32  | 1.22  | 5.3E-06 | 2.8E-07 | 15937    | immediate early response 3                                                                                                            |
| Ifi27     | 1.64  | 0.71  | 2.8E-04 | 2.2E-05 | 52668    | interferon, alpha-inducible protein 27                                                                                                |
| Ifnlr1    | 0.26  | -1.76 | 3.6E-04 | 2.9E-05 | 242700   | interferon lambda receptor 1                                                                                                          |
| Ifi122    | 1.63  | 0.90  | 1.3E-05 | 7.2E-07 | 81896    | intracellular transport 122                                                                                                           |
| Igf2bp1   | 2.49  | 0.65  | 3.5E-05 | 2.2E-06 | 140486   | insulin-like growth factor 2 mRNA binding protein 1                                                                                   |
| Igf2bp6   | 2.36  | 1.24  | 6.3E-11 | 1.6E-12 | 16012    | insulin-like growth factor binding protein 6                                                                                          |
| Igfbp7    | 1.72  | 0.79  | 3.1E-07 | 1.3E-08 | 29817    | insulin-like growth factor binding protein 7                                                                                          |
| Igln5     | 0.39  | -1.36 | 8.6E-06 | 4.7E-07 | 210094   | IgLN family member 5                                                                                                                  |
| Igsf1     | 7.38  | 2.88  | 5.3E-45 | 5.4E-48 | 209268   | immunoglobulin superfamily, member 1                                                                                                  |
| Igsf9     | 0.36  | -1.46 | 5.9E-03 | 7.6E-04 | 93842    | immunoglobulin superfamily, member 9                                                                                                  |
| Igtp      | 2.64  | 1.40  | 1.1E-11 | 2.4E-13 | 16145    | interferon gamma induced GTPase                                                                                                       |
| Igtp1     | 2.55  | 1.35  | 1.1E-04 | 7.6E-06 | 60440    | interferon inducible GTPase 1                                                                                                         |
| Il10ra    | 1.76  | 0.82  | 4.5E-03 | 5.5E-04 | 16154    | interleukin 10 receptor, alpha                                                                                                        |
| Il33      | 1.79  | 0.84  | 6.5E-03 | 8.5E-04 | 77125    | interleukin 33                                                                                                                        |
| Immt      | 1.64  | 0.72  | 8.8E-07 | 3.9E-08 | 76614    | inner membrane protein, mitochondrial                                                                                                 |
| Impa2     | 1.69  | 0.75  | 2.1E-07 | 8.5E-09 | 114663   | inositol (myo)-1-(or 4)-monophosphatase 2                                                                                             |
| Inafm1    | 0.65  | -0.61 | 3.3E-03 | 3.9E-04 | 66300    | InaF motif containing 1                                                                                                               |
| Inhb3     | 0.49  | -1.03 | 6.9E-03 | 9.1E-04 | 16324    | inhibin beta-B                                                                                                                        |
| Ino80bds  | 1.92  | 0.94  | 9.4E-07 | 4.3E-08 | 10038094 | INO80 complex subunit D, opposite strand                                                                                              |
| Inpp4b    | 1.89  | 0.92  | 4.3E-04 | 2.4E-05 | 234515   | inositol polyphosphate-4-phosphatase, type II                                                                                         |
| Inpp5a    | 1.84  | 0.88  | 8.6E-10 | 2.4E-11 | 212111   | inositol polyphosphate-5-phosphatase A                                                                                                |
| Inpp5k    | 1.86  | 0.89  | 2.3E-09 | 7.0E-11 | 19062    | inositol polyphosphate 5-phosphatase K                                                                                                |
| Insr      | 1.80  | 0.85  | 3.4E-09 | 1.0E-10 | 16337    | insulin receptor                                                                                                                      |
| Ip6k3     | 8.35  | 3.06  | 4.9E-26 | 2.9E-28 | 271424   | inositol hexaphosphate kinase 3                                                                                                       |
| Ipo13     | 1.58  | 0.66  | 1.9E-06 | 9.1E-08 | 230673   | importin 13                                                                                                                           |
| Irf6      | 0.55  | -0.87 | 4.1E-04 | 3.4E-05 | 54139    | interferon regulatory factor 6                                                                                                        |
| Irgm2     | 2.85  | 1.51  | 3.2E-10 | 8.8E-12 | 54396    | immunity-related GTPase family M member 2                                                                                             |

|          |       |        |          |          |           |                                                                                    |
|----------|-------|--------|----------|----------|-----------|------------------------------------------------------------------------------------|
| Irx1     | 0.23  | -2.12  | 1.3E-03  | 1.3E-04  | 16371     | Iroquois related homeobox 1                                                        |
| IscA1    | 1.82  | 0.86   | 1.1E-09  | 3.3E-11  | 69046     | iron-sulfur cluster assembly 1 homolog                                             |
| Isg20l2  | 0.59  | -0.76  | 8.5E-08  | 3.2E-09  | 229504    | interferon stimulated exonuclease gene 20-like 2                                   |
| Ism1     | 0.45  | -1.14  | 3.6E-05  | 2.3E-06  | 319909    | isthmin 1 homolog                                                                  |
| Isyna1   | 0.65  | -0.62  | 2.1E-05  | 1.3E-06  | 71780     | myo-inositol 1-phosphate synthase A1                                               |
| Itag7    | 2.12  | 1.09   | 3.1E-09  | 9.4E-11  | 16404     | integrin alpha 7                                                                   |
| Itagl    | 1.77  | 0.82   | 4.2E-04  | 3.5E-05  | 16408     | integrin alpha L                                                                   |
| Itaglbp2 | 1.72  | 1.89   | 3.9E-23  | 2.8E-25  | 26549     | integrin beta 1 binding protein 2                                                  |
| Itag6    | 1.78  | 0.83   | 6.8E-04  | 6.1E-05  | 16420     | integrin beta 6                                                                    |
| Ith5     | 1.70  | 0.76   | 7.1E-06  | 3.8E-07  | 209378    | inter-alpha (globulin) inhibitor H5                                                |
| Itn2a    | 1.69  | -0.76  | 2.6E-06  | 1.3E-07  | 16431     | integral membrane protein 2A                                                       |
| Itpkc    | 0.65  | -0.62  | 5.6E-03  | 7.1E-04  | 233011    | inositol 1,4,5-trisphosphate 3-kinase C                                            |
| Itrip    | 0.52  | -0.95  | 1.1E-06  | 5.2E-08  | 414801    | inositol 1,4,5-trisphosphate receptor interacting protein                          |
| Jam2     | 1.84  | 0.88   | 1.0E-07  | 3.9E-09  | 67374     | junction adhesion molecule 2                                                       |
| Jph1     | 3.16  | 1.66   | 6.0E-20  | 5.4E-22  | 57339     | junctophilin 1                                                                     |
| Jph2     | 2.26  | 1.18   | 5.7E-11  | 1.4E-12  | 59091     | junctophilin 2                                                                     |
| Jph4     | 0.52  | -0.93  | 8.5E-04  | 7.9E-05  | 319984    | junctophilin 4                                                                     |
| Jrk      | 0.59  | -0.75  | 3.8E-03  | 4.6E-04  | 16469     | jerky                                                                              |
| Jsrp1    | 3.88  | 1.96   | 1.3E-31  | 4.2E-34  | 71912     | junctional sarcoplasmic reticulum protein 1                                        |
| Jup      | 0.48  | -1.05  | 4.9E-03  | 6.1E-04  | 16480     | junction plakoglobin                                                               |
| Kat2b    | 1.54  | 0.62   | 1.4E-04  | 1.0E-05  | 18519     | K(lysine) acetyltransferase 2B                                                     |
| Kazn     | 0.54  | -0.88  | 2.7E-05  | 1.6E-06  | 71529     | kazrin, peripilin interacting protein                                              |
| Kblhd12  | 3.51  | 1.81   | 1.1E-11  | 2.4E-13  | 74589     | kelch repeat and BTB (POZ) domain containing 12                                    |
| Kblhd13  | 3.00  | 1.58   | 7.1E-13  | 1.4E-14  | 74492     | kelch repeat and BTB (POZ) domain containing 13                                    |
| Kcna1    | 0.49  | -1.04  | 3.6E-05  | 2.3E-06  | 16485     | potassium voltage-gated channel, shaker-related subfamily, member 1                |
| Kcna2    | 1.72  | 0.78   | 4.6E-03  | 5.7E-04  | 16490     | potassium voltage-gated channel, shaker-related subfamily, member 2                |
| Kcna7    | 6.93  | 2.79   | 3.3E-21  | 2.8E-23  | 16495     | potassium voltage-gated channel, shaker-related subfamily, member 7                |
| Kcnb1    | 2.50  | 1.32   | 3.5E-13  | 6.6E-15  | 16500     | potassium voltage-gated channel, Shab-related subfamily, member 1                  |
| Kcnc1    | 3.77  | 1.92   | 1.6E-11  | 3.7E-13  | 16502     | potassium voltage-gated channel, Shaw-related subfamily, member 1                  |
| Kcnc4    | 2.17  | 1.12   | 6.8E-05  | 4.7E-06  | 99738     | potassium voltage-gated channel, Shaw-related subfamily, member 4                  |
| Kcnc11   | 1.97  | 0.98   | 1.1E-09  | 3.2E-11  | 66240     | potassium voltage-gated channel, Isk-related family, member 1-like, pseudogene     |
| Kcnf1    | 9.34  | 3.22   | 7.2E-28  | 3.4E-30  | 382571    | potassium voltage-gated channel, subfamily F, member 1                             |
| Kcnj10   | 2.04  | 1.03   | 5.4E-03  | 6.8E-04  | 16513     | potassium inwardly-rectifying channel, subfamily J, member 10                      |
| Kcnj11   | 3.16  | 1.66   | 4.4E-18  | 4.8E-20  | 16514     | potassium inwardly-rectifying channel, subfamily J, member 11                      |
| Kcnj12   | 3.55  | 1.83   | 2.9E-18  | 3.1E-20  | 16515     | potassium inwardly-rectifying channel, subfamily J, member 12                      |
| Kcnj15   | 0.55  | -0.85  | 1.9E-03  | 2.0E-04  | 16516     | potassium inwardly-rectifying channel, subfamily J, member 15                      |
| Kcnj8    | 1.58  | 0.66   | 5.8E-04  | 5.1E-05  | 24953     | potassium inwardly-rectifying channel, subfamily J, member 8                       |
| Kcnk2    | 0.57  | -0.81  | 1.2E-03  | 1.2E-04  | 16526     | potassium channel, subfamily K, member 2                                           |
| Kcnk3    | 5.58  | 2.48   | 3.6E-07  | 1.5E-08  | 16527     | potassium channel, subfamily K, member 3                                           |
| Kcnma1   | 1.71  | 0.77   | 2.8E-03  | 3.1E-04  | 16531     | potassium large conductance calcium-activated channel, subfamily M, alpha member 1 |
| Kcnmb4   | 0.52  | -0.95  | 6.7E-04  | 6.0E-05  | 58802     | potassium large conductance calcium-activated channel, subfamily M, beta member 4  |
| Kcnq1    | 2.56  | 1.36   | 3.0E-08  | 1.1E-09  | 16535     | potassium voltage-gated channel, subfamily Q, member 1                             |
| Kcnq4    | 2.51  | 1.33   | 6.7E-10  | 1.9E-11  | 60613     | potassium voltage-gated channel, subfamily Q, member 4                             |
| Kctd1    | 0.42  | -1.25  | 6.8E-05  | 4.7E-06  | 106931    | potassium channel tetramerisation domain containing 1                              |
| Kctd12   | 0.65  | -0.61  | 3.2E-04  | 2.6E-05  | 239217    | potassium channel tetramerisation domain containing 12                             |
| Kctd15   | 0.59  | -0.77  | 1.1E-05  | 6.1E-07  | 233107    | potassium channel tetramerisation domain containing 15                             |
| Kdf1     | 0.23  | -2.09  | 6.1E-03  | 7.9E-04  | 69073     | keratinocyte differentiation factor                                                |
| Kif1b    | 1.83  | 0.87   | 1.8E-08  | 6.0E-10  | 16561     | kinesin family member 1B                                                           |
| Kif21a   | 0.33  | -1.60  | 4.7E-05  | 3.1E-06  | 16564     | kinesin family member 21A                                                          |
| Kif21b   | 0.66  | -0.60  | 7.1E-03  | 9.5E-04  | 16565     | kinesin family member 21B                                                          |
| Kif26b   | 0.43  | -1.23  | 7.2E-07  | 3.2E-08  | 26952     | kinesin family member 26B                                                          |
| Kif7     | 0.61  | -0.72  | 3.1E-04  | 2.5E-05  | 16576     | kinesin family member 7                                                            |
| Kirrel3  | 0.38  | -1.38  | 7.4E-05  | 5.1E-06  | 67703     | kin of IRRE like 3                                                                 |
| Kl       | 4.34  | 2.12   | 4.7E-17  | 5.7E-19  | 16591     | klotho                                                                             |
| Klc3     | 0.45  | -1.15  | 5.3E-04  | 4.6E-05  | 232943    | kinesin light chain 3                                                              |
| Klf15    | 2.74  | 1.45   | 6.2E-11  | 1.5E-12  | 66277     | Kruppel-like factor 15                                                             |
| Klf5     | 0.47  | -1.09  | 5.5E-04  | 4.8E-05  | 12224     | Kruppel-like factor 5                                                              |
| Klf9     | 2.76  | 1.46   | 2.8E-11  | 6.5E-13  | 16601     | Kruppel-like factor 9                                                              |
| Klhdc1   | 1.78  | 0.83   | 2.0E-03  | 2.1E-04  | 271005    | kelch domain containing 1                                                          |
| Klhdc3   | 1.62  | 0.70   | 1.0E-06  | 4.6E-08  | 71765     | kelch domain containing 3                                                          |
| Klhl23   | 1.57  | 0.66   | 1.8E-05  | 1.1E-06  | 277396    | kelch-like 23                                                                      |
| Klhl24   | 2.03  | 1.02   | 3.5E-11  | 8.4E-13  | 75785     | kelch-like 24                                                                      |
| Klhl3    | 2.16  | 1.11   | 2.7E-06  | 1.3E-07  | 100503085 | kelch-like 3                                                                       |
| Klh30    | 2.86  | 1.52   | 1.6E-16  | 2.1E-18  | 70788     | kelch-like 30                                                                      |
| Klhl31   | 2.97  | 1.57   | 1.2E-15  | 1.7E-17  | 244923    | kelch-like 31                                                                      |
| Klhl38   | 3.56  | 1.83   | 1.6E-17  | 1.8E-19  | 268807    | kelch-like 38                                                                      |
| Klhl40   | 2.14  | 1.10   | 2.8E-11  | 6.6E-13  | 72330     | kelch-like 40                                                                      |
| Klhl41   | 2.60  | 1.38   | 2.7E-14  | 4.5E-16  | 228003    | kelch-like 41                                                                      |
| Klk10    | 0.14  | -2.89  | 5.6E-07  | 2.4E-08  | 69540     | kallikrein related-peptidase 10                                                    |
| Klk1b26  | 5.06  | 2.34   | 5.2E-14  | 9.0E-16  | 16618     | kallikrein 1-related peptidase b26                                                 |
| Klrg2    | 0.32  | -1.64  | 2.3E-03  | 2.5E-04  | 74253     | killer cell lectin-like receptor subfamily G, member 2                             |
| Kremen2  | 0.24  | -2.05  | 2.0E-04  | 1.5E-05  | 73016     | kringle containing transmembrane protein 2                                         |
| Krt13    | 0.05  | -4.20  | 1.2E-20  | 1.1E-22  | 16663     | keratin 13                                                                         |
| Krt18    | 0.42  | -1.25  | 4.5E-05  | 2.9E-06  | 16668     | keratin 18                                                                         |
| Krt19    | 0.01  | -6.97  | 6.8E-203 | 4.4E-207 | 16669     | keratin 19                                                                         |
| Krt4     | 0.01  | -6.89  | 4.5E-95  | 8.9E-99  | 16682     | keratin 4                                                                          |
| Krt6a    | 0.01  | -6.20  | 1.0E-51  | 5.2E-55  | 16687     | keratin 6A                                                                         |
| Krt6b    | 0.02  | -5.40  | 1.2E-10  | 3.0E-12  | 16688     | keratin 6B                                                                         |
| Krt7     | 0.04  | -4.83  | 2.5E-54  | 1.1E-57  | 110310    | keratin 7                                                                          |
| Krt77    | 0.07  | -3.74  | 9.3E-04  | 8.8E-05  | 406220    | keratin 77                                                                         |
| Krt8     | 0.60  | -0.75  | 2.0E-03  | 2.2E-04  | 16691     | keratin 8                                                                          |
| Krtap13  | 0.00  | -13.01 | 2.9E-183 | 2.8E-187 | 16699     | keratin associated protein 13                                                      |
| Kscr1    | 1.78  | 0.83   | 6.4E-07  | 2.8E-08  | 16706     | kinase suppressor of ras 1                                                         |
| Ktn1     | 1.56  | 0.64   | 7.7E-06  | 4.1E-07  | 16709     | kinectin 1                                                                         |
| Ky       | 1.82  | 0.86   | 2.6E-05  | 1.6E-06  | 16716     | kyphosis-associated protein                                                        |
| L2bgdh   | 1.71  | 0.77   | 5.1E-07  | 2.2E-08  | 217666    | L-2-hydroxyglutarate dehydrogenase                                                 |
| Lace1    | 1.65  | 0.72   | 2.3E-03  | 2.4E-04  | 215951    | lactation elevated 1                                                               |
| Lama2    | 1.94  | 0.96   | 1.2E-10  | 3.2E-12  | 16773     | laminin, alpha 2                                                                   |
| Larp1b   | 2.93  | 1.55   | 1.4E-12  | 2.9E-14  | 214048    | La ribonucleoprotein domain family, member 1B                                      |
| Lbp      | 1.77  | 0.82   | 1.7E-03  | 1.7E-04  | 16803     | lipopolysaccharide binding protein                                                 |
| Lec3f    | 0.03  | -5.22  | 1.6E-15  | 2.4E-17  | 69520     | late cornified envelope 3F                                                         |
| Lcn2     | 6.16  | 2.62   | 7.7E-11  | 1.9E-12  | 16819     | lipocalin 2                                                                        |
| Lhb3     | 4.59  | 2.20   | 1.0E-26  | 5.5E-29  | 24131     | LIM domain binding 3                                                               |
| Llha     | 1.96  | 0.97   | 8.8E-12  | 1.8E-13  | 16828     | lactate dehydrogenase A                                                            |
| Lldhb    | 1.87  | 0.90   | 4.4E-12  | 9.7E-14  | 16832     | lactate dehydrogenase B                                                            |
| Lef1     | 0.38  | -1.41  | 7.0E-04  | 6.3E-05  | 16842     | lymphoid enhancer binding factor 1                                                 |
| Lgals3bp | 1.83  | 0.87   | 3.4E-06  | 1.7E-07  | 19039     | lectin, galactoside-binding, soluble, 3 binding protein                            |
| Lgmn     | 1.63  | 0.71   | 9.3E-07  | 4.2E-08  | 19141     | legumain                                                                           |
| Lhfp1l   | 0.53  | -0.91  | 2.8E-04  | 2.2E-05  | 237091    | lipoma HMGIC fusion partner-like 1                                                 |
| Limk2    | 0.56  | -0.83  | 5.9E-04  | 5.2E-05  | 16886     | LIM motif-containing protein kinase 2                                              |
| Lims2    | 2.31  | 1.21   | 5.9E-07  | 2.5E-08  | 225341    | LIM and senescent cell antigen like domains 2                                      |
| Lingo3   | 4.78  | 2.26   | 7.3E-17  | 9.1E-19  | 237403    | leucine rich repeat and Ig domain containing 3                                     |
| Lipe     | 6.03  | 2.59   | 2.8E-06  | 1.4E-07  | 16890     | lipase, hormone sensitive                                                          |
| Lipg     | 0.41  | -1.30  | 4.7E-04  | 4.0E-05  | 16891     | lipase, endothelial                                                                |
| Lix1     | 0.43  | -1.21  | 7.8E-06  | 4.2E-07  | 66643     | limb expression 1 homolog                                                          |
| Lmcd1    | 2.46  | 1.30   | 5.7E-11  | 1.4E-12  | 30937     | LIM and cysteine-rich domains 1                                                    |
| Lmo1     | 0.38  | -1.40  | 8.3E-04  | 7.6E-05  | 109594    | LIM domain only 1                                                                  |
| Lmo4     | 0.67  | -0.59  | 1.4E-04  | 1.0E-05  | 16911     | LIM domain only 4                                                                  |
| Lmo7     | 2.03  | 1.02   | 6.0E-13  | 1.2E-14  | 380928    | LIM domain only 7                                                                  |
| Lmod1    | 2.02  | 1.02   | 1.5E-04  | 1.1E-05  | 93689     | leiomodulin 1 (smooth muscle)                                                      |
| Lmod2    | 3.69  | 1.88   | 1.9E-14  | 3.0E-16  | 93677     | leiomodulin 2 (cardiac)                                                            |
| Lmod3    | 2.50  | 1.32   | 4.3E-10  | 1.2E-11  | 320502    | leiomodulin 3 (fetal)                                                              |
| Lmtk3    | 0.39  | -1.37  | 5.1E-04  | 4.4E-05  | 381983    | lemur tyrosine kinase 3                                                            |
| Lmx1b    | 0.32  | -1.64  | 4.8E-06  | 2.5E-07  | 16917     | LIM homeobox transcription factor 1 beta                                           |
| Lpar2    | 0.46  | -1.14  | 6.3E-05  | 4.3E-06  | 53978     | lysophosphatidic acid receptor 2                                                   |
| Lpcat4   | 0.56  | -0.83  | 5.7E-04  | 5.0E-05  | 99010     | lysophosphatidylcholine acyltransferase 4                                          |
| Lphn1    | 0.66  | -0.61  | 1.5E-05  | 8.8E-07  | 330814    | latrophilin 1                                                                      |
| Lpin1    | 2.70  | 1.43   | 3.9E-13  | 7.5E-15  | 14245     | lipin 1                                                                            |
| Lpl      | 4.91  | 2.30   | 2.9E-26  | 1.7E-28  | 16956     | lipoprotein lipase                                                                 |
| Lrn1     | 0.49  | -1.02  | 4.5E-06  | 2.3E-07  | 80749     | leucine rich repeat and fibronectin type III domain containing 1                   |
| Lrlg1    | 1.51  | 0.60   | 1.5E-05  | 8.9E-07  | 16206     | leucine-rich repeats and immunoglobulin-like domains 1                             |
| Lrp8     | 0.43  | -1.21  | 1.6E-06  | 7.3E-08  | 16975     | low density lipoprotein receptor-related protein 8, apolipoprotein e receptor      |
| Lrrc1    | 0.55  | -0.86  | 6.4E-05  | 4.4E-06  | 214346    | leucine rich repeat containing 1                                                   |
| Lrrc14b  | 2.35  | 1.23   | 4.1E-13  | 7.8E-15  | 432779    | leucine rich repeat containing 14B                                                 |
| Lrrc16a  | 0.61  | -0.72  | 3.0E-04  | 2.4E-05  | 68732     | leucine rich repeat containing 16A                                                 |
| Lrrc16b  | 0.52  | -0.96  | 3.0E-03  | 3.4E-04  | 268747    | leucine rich repeat containing 16B                                                 |
| Lrrc2    | 14.88 | 3.90   | 3.9E-23  | 2.8E-25  | 74249     | leucine rich repeat containing 2                                                   |
| Lrrc20   | 1.78  | 0.83   | 5.7E-09  | 1.8E-10  | 216011    | leucine rich repeat containing 20                                                  |
| Lrrc30   | 2.00  | 1.00   | 8.7E-04  | 8.1E-05  | 240131    | leucine rich repeat containing 30                                                  |
| Lrrc38   | 1.82  | 0.86   | 2.5E-03  | 2.7E-04  | 242735    | leucine rich repeat containing 38                                                  |
| Lrrc39   | 4.01  | 2.01   | 2.8E-17  | 3.4E-19  | 109245    | leucine rich repeat containing 39                                                  |

|          |       |       |         |         |           |                                                                            |
|----------|-------|-------|---------|---------|-----------|----------------------------------------------------------------------------|
| Lrrc45   | 0.66  | -0.59 | 1.4E-03 | 1.4E-04 | 217366    | leucine rich repeat containing 45                                          |
| Lrrc75a  | 1.74  | 0.80  | 3.7E-07 | 1.5E-08 | 192976    | leucine rich repeat containing 75A                                         |
| Lrrfp1   | 2.29  | 1.20  | 4.5E-14 | 7.7E-16 | 16978     | leucine rich repeat (in FLII) interacting protein 1                        |
| Lrtm1    | 3.43  | 1.78  | 1.2E-14 | 1.9E-16 | 319476    | leucine-rich repeats and transmembrane domains 1                           |
| Lsmem1   | 2.33  | 1.22  | 1.6E-05 | 9.2E-07 | 380755    | leucine-rich single-pass membrane protein 1                                |
| Lsr      | 0.34  | -1.54 | 2.7E-03 | 3.0E-04 | 54135     | lipolysis stimulated lipoprotein receptor                                  |
| Lss      | 0.45  | -1.15 | 1.1E-05 | 6.4E-07 | 16987     | lanosterol synthase                                                        |
| Ltbp1    | 0.57  | -0.81 | 2.1E-06 | 1.0E-07 | 268977    | latent transforming growth factor beta binding protein 1                   |
| Ltbp2    | 0.61  | -0.72 | 1.5E-05 | 8.5E-07 | 16997     | latent transforming growth factor beta binding protein 2                   |
| Ltf      | 4.48  | 2.16  | 1.8E-08 | 6.1E-10 | 17002     | lactotransferrin                                                           |
| Ly6a     | 2.89  | 1.53  | 7.0E-09 | 2.2E-10 | 110454    | lymphocyte antigen 6 complex, locus A                                      |
| Ly6e1    | 2.65  | 1.41  | 3.4E-10 | 9.2E-12 | 17067     | lymphocyte antigen 6 complex, locus C1                                     |
| Lyx1     | 1.79  | 0.84  | 8.8E-06 | 4.8E-07 | 23936     | LY6/neurotoxin 1                                                           |
| Lypd6b   | 0.28  | -1.85 | 6.1E-03 | 7.9E-04 | 71897     | LY6/PLAUR domain containing 6B                                             |
| Lym5     | 2.14  | 1.10  | 2.4E-08 | 8.2E-10 | 67636     | LVR motif containing 5                                                     |
| Lym7     | 1.80  | 0.85  | 4.2E-04 | 3.4E-05 | 75530     | LVR motif containing 7                                                     |
| Lyz2     | 1.83  | 0.87  | 4.8E-05 | 3.1E-06 | 17105     | lysozyme 2                                                                 |
| Mab212   | 0.38  | -1.38 | 2.8E-06 | 1.4E-07 | 23937     | mab-21-like 2                                                              |
| Macrodl  | 2.95  | 1.56  | 1.2E-26 | 6.4E-29 | 107227    | MACRO domain containing 1                                                  |
| Mafa     | 5.41  | 2.44  | 7.5E-20 | 6.9E-22 | 378435    | v-maf musculoaponeurotic fibrosarcoma oncogene family, protein A           |
| Maff     | 1.74  | 0.80  | 7.5E-05 | 5.2E-06 | 17133     | v-maf musculoaponeurotic fibrosarcoma oncogene family, protein F           |
| Mai      | 0.18  | -2.49 | 9.0E-50 | 5.3E-53 | 17153     | myelin and lymphocyte protein, T cell differentiation protein              |
| Mai1     | 0.48  | -1.07 | 1.9E-07 | 7.7E-09 | 238576    | mai, T cell differentiation protein-like                                   |
| Mamstr   | 2.27  | 1.18  | 7.7E-12 | 1.7E-13 | 74490     | MEF2 activating motif and SAP domain containing transcriptional regulator  |
| Manba    | 1.59  | 0.67  | 5.3E-03 | 6.6E-04 | 110173    | mannosidase, beta A, lysosomal                                             |
| Manf     | 0.62  | -0.69 | 9.2E-05 | 6.5E-06 | 74840     | mesencephalic astrocyte-derived neurotrophic factor                        |
| Map1lc3a | 1.98  | 0.98  | 2.2E-10 | 5.9E-12 | 66734     | microtubule-associated protein 1 light chain 3 alpha                       |
| Map3k15  | 2.17  | 1.11  | 6.7E-16 | 9.2E-18 | 270672    | mitogen-activated protein kinase kinase kinase 15                          |
| Map3k7cl | 1.78  | 0.83  | 6.0E-04 | 5.3E-05 | 224419    | Map3k7 C-terminal like                                                     |
| Map9     | 0.58  | -0.79 | 3.2E-03 | 3.6E-04 | 213582    | microtubule-associated protein 9                                           |
| Mapk12   | 2.19  | 1.13  | 4.8E-10 | 1.3E-11 | 29857     | mitogen-activated protein kinase 12                                        |
| March9   | 0.48  | -1.07 | 1.9E-04 | 1.4E-05 | 216438    | membrane-associated ring finger (C3HC4) 9                                  |
| Marcks11 | 0.55  | -0.85 | 2.4E-09 | 7.2E-11 | 17357     | MARCKS-like 1                                                              |
| Mats4    | 0.33  | -1.58 | 6.1E-04 | 5.3E-05 | 17183     | matrilin 4                                                                 |
| Mb       | 2.06  | 1.04  | 2.6E-04 | 2.1E-05 | 17189     | myoglobin                                                                  |
| Mboat2   | 0.49  | -1.02 | 2.8E-03 | 3.2E-04 | 67216     | membrane bound O-acyltransferase domain containing 2                       |
| Mbp      | 2.77  | 1.47  | 2.0E-08 | 6.7E-10 | 17196     | myelin basic protein                                                       |
| Mccc     | 1.76  | 0.81  | 2.3E-04 | 1.8E-05 | 73724     | methylmalonyl CoA epimerase                                                |
| Mcf2l    | 2.01  | 1.01  | 8.1E-11 | 2.0E-12 | 17207     | mcf2 transforming sequence-like                                            |
| Mchr1    | 4.02  | 2.01  | 1.3E-13 | 2.3E-15 | 207911    | melanin-concentrating hormone receptor 1                                   |
| Mcm10    | 0.55  | -0.86 | 1.3E-05 | 7.5E-07 | 70024     | minichromosome maintenance deficient 10                                    |
| Mcm3     | 0.65  | -0.62 | 3.7E-06 | 1.9E-07 | 17215     | minichromosome maintenance deficient 3                                     |
| Mcm5     | 0.62  | -0.70 | 3.8E-07 | 1.6E-08 | 17218     | minichromosome maintenance deficient 5, cell division cycle 46             |
| Mcp4     | 3.21  | 1.68  | 3.3E-10 | 8.9E-12 | 17227     | mast cell protease 4                                                       |
| Mdf6     | 0.56  | -0.83 | 2.5E-07 | 1.0E-08 | 17240     | MyoD family inhibitor                                                      |
| Mdh1     | 2.16  | 1.11  | 4.7E-16 | 6.3E-18 | 17449     | malate dehydrogenase 1, NAD (soluble)                                      |
| Mdh2     | 1.90  | 0.93  | 1.8E-11 | 4.1E-13 | 17448     | malate dehydrogenase 2, NAD (mitochondrial)                                |
| Mdk      | 0.54  | -0.89 | 9.3E-08 | 3.5E-09 | 17242     | midkine                                                                    |
| Medag    | 1.79  | 0.84  | 9.9E-06 | 5.4E-07 | 70717     | mesenteric estrogen dependent adipogenesis                                 |
| Mez2c    | 1.89  | 0.92  | 2.4E-07 | 9.7E-09 | 17260     | myocyte enhancer factor 2C                                                 |
| Mez2d    | 1.62  | 0.70  | 2.4E-05 | 1.4E-06 | 17261     | myocyte enhancer factor 2D                                                 |
| Megf6    | 0.49  | -1.04 | 3.4E-08 | 1.2E-09 | 230971    | multiple EGF-like-domains 6                                                |
| Mettl11b | 3.17  | 1.66  | 1.9E-06 | 8.9E-08 | 240879    | methyltransferase like 11B                                                 |
| Mett10   | 1.86  | 0.90  | 8.6E-04 | 8.0E-05 | 320204    | methyltransferase like 20                                                  |
| Mett12c  | 18.04 | 4.17  | 2.5E-26 | 1.4E-28 | 433294    | methyltransferase like 21C                                                 |
| Mett12e  | 14.92 | 3.90  | 7.3E-27 | 3.8E-29 | 403183    | methyltransferase like 21E                                                 |
| Mett122  | 2.00  | 1.00  | 2.1E-06 | 1.0E-07 | 239706    | methyltransferase like 22                                                  |
| Mfap5    | 2.21  | 1.14  | 7.8E-18 | 8.7E-20 | 50530     | microfibrillar associated protein 5                                        |
| Mfn2     | 2.21  | 1.14  | 9.7E-17 | 1.2E-18 | 170731    | mitofusin 2                                                                |
| Mfsd2a   | 0.22  | -2.16 | 2.3E-04 | 1.8E-05 | 76574     | major facilitator superfamily domain containing 2A                         |
| Mfsd5    | 0.63  | -0.66 | 1.2E-04 | 8.9E-06 | 106073    | major facilitator superfamily domain containing 5                          |
| Mgat3    | 0.62  | -0.68 | 4.8E-04 | 4.1E-05 | 17309     | mannoside acetylglucosaminyltransferase 3                                  |
| Mgl1     | 1.83  | 0.87  | 7.7E-08 | 2.9E-09 | 23945     | monoglyceride lipase                                                       |
| Mgat3    | 1.70  | 0.77  | 3.2E-05 | 2.0E-06 | 66447     | microsomal glutathione S-transferase 3                                     |
| Miat     | 0.42  | -1.24 | 4.1E-09 | 1.3E-10 | 330166    | myocardial infarction-associated transcript (non-protein coding)           |
| Mica3    | 1.76  | 0.82  | 1.4E-04 | 9.9E-06 | 194401    | microtubule-associated monooxygenase, calponin and LIM domain containing 3 |
| Micv1    | 1.53  | 0.62  | 1.5E-05 | 8.6E-07 | 216001    | mitochondrial calcium uptake 1                                             |
| Midl1    | 0.53  | -0.91 | 4.3E-03 | 5.2E-04 | 17318     | midline 1                                                                  |
| Mieo2    | 2.56  | 1.36  | 2.6E-17 | 3.1E-19 | 237781    | mitochondrial elongation factor 2                                          |
| Mir127   | 3.07  | 1.62  | 4.6E-08 | 1.7E-09 | 387146    | microRNA 127                                                               |
| Mir22hg  | 1.65  | 0.72  | 3.0E-04 | 2.4E-05 | 100042498 | Mir22 host gene (non-protein coding)                                       |
| Mir410   | 1.89  | 0.92  | 6.2E-04 | 5.5E-05 | 723863    | microRNA 410                                                               |
| Mir431   | 2.90  | 1.54  | 8.9E-10 | 2.5E-11 | 723866    | microRNA 431                                                               |
| Mir433   | 2.64  | 1.40  | 2.9E-09 | 8.9E-11 | 723937    | microRNA 433                                                               |
| Mir434   | 2.86  | 1.52  | 8.9E-08 | 3.4E-09 | 723867    | microRNA 434                                                               |
| Mir5114  | 0.66  | -0.60 | 4.1E-03 | 4.9E-04 | 100628619 | microRNA 5114                                                              |
| Mir675   | 1.86  | 0.89  | 3.2E-10 | 8.6E-12 | 735280    | microRNA 675                                                               |
| Mirg     | 1.79  | 0.84  | 1.6E-09 | 4.6E-11 | 100040724 | miRNA containing gene                                                      |
| Mkl1     | 1.62  | 0.69  | 4.6E-07 | 1.9E-08 | 223701    | MKL (megakaryoblastic leukemia)/myocardin-like 1                           |
| Mknk2    | 1.52  | 0.63  | 8.4E-05 | 5.9E-06 | 17347     | MAP kinase-interacting serine/threonine kinase 2                           |
| Mknk2    | 1.61  | 0.69  | 3.2E-06 | 1.6E-07 | 67027     | makorin, ring finger protein, 2                                            |
| Mli1     | 7.17  | 2.84  | 2.6E-34 | 5.8E-37 | 17349     | myeloid leukemia factor 1                                                  |
| Mlip     | 6.97  | 2.80  | 2.6E-26 | 1.5E-28 | 69642     | muscular LIMNA-interacting protein                                         |
| Mllt1    | 0.66  | -0.61 | 1.2E-05 | 7.0E-07 | 64144     | myeloid/lymphoid or mixed-lineage leukemia; translocated to, 1             |
| Mllt11   | 1.91  | 0.94  | 6.0E-06 | 3.2E-07 | 56772     | myeloid/lymphoid or mixed-lineage leukemia; translocated to, 11            |
| Mllt3    | 2.64  | 1.40  | 3.0E-21 | 2.6E-23 | 70122     | myeloid/lymphoid or mixed-lineage leukemia; translocated to, 3             |
| Mlyed    | 1.75  | 0.80  | 4.3E-06 | 2.2E-07 | 56690     | malonyl-CoA decarboxylase                                                  |
| Mme      | 0.55  | -0.87 | 1.5E-05 | 8.7E-07 | 17380     | membrane metallo endopeptidase                                             |
| Mmp11    | 0.44  | -1.20 | 2.4E-06 | 1.1E-07 | 17385     | matrix metalloproteinase 11                                                |
| Mmp8     | 9.56  | 3.26  | 1.7E-14 | 2.7E-16 | 17394     | matrix metalloproteinase 8                                                 |
| Mndal    | 2.00  | 1.00  | 3.2E-03 | 3.7E-04 | 100040462 | myeloid nuclear differentiation antigen like                               |
| Mocos    | 0.29  | -1.80 | 7.2E-05 | 4.9E-06 | 68591     | molybdenum cofactor sulfuryase                                             |
| Mospd1   | 1.82  | 0.86  | 2.5E-07 | 1.0E-08 | 70380     | motile sperm domain containing 1                                           |
| Mpc1     | 1.90  | 0.93  | 2.4E-03 | 2.5E-04 | 55951     | mitochondrial pyruvate carrier 1                                           |
| Mpc2     | 1.82  | 0.86  | 1.3E-08 | 4.2E-10 | 70456     | mitochondrial pyruvate carrier 2                                           |
| Mpi      | 2.54  | 1.34  | 3.0E-18 | 3.3E-20 | 110119    | mannose phosphate isomerase                                                |
| Mpp3     | 2.61  | 1.39  | 2.7E-12 | 5.9E-14 | 13384     | membrane protein, palmitoylated 3 (MAGUK p55 subfamily member 3)           |
| Mpp6     | 1.67  | 0.74  | 6.2E-06 | 3.3E-07 | 56524     | membrane protein, palmitoylated 6 (MAGUK p55 subfamily member 6)           |
| Mpp7     | 0.46  | -1.12 | 5.0E-03 | 6.3E-04 | 75739     | membrane protein, palmitoylated 7 (MAGUK p55 subfamily member 7)           |
| Mpped1   | 0.23  | -2.12 | 2.3E-07 | 9.2E-09 | 223726    | metallophosphoesterase domain containing 1                                 |
| Mpped2   | 0.52  | -0.95 | 1.9E-04 | 1.4E-05 | 77015     | metallophosphoesterase domain containing 2                                 |
| Mpv17    | 1.57  | 0.65  | 1.9E-05 | 1.1E-06 | 17527     | MpV17 mitochondrial inner membrane protein                                 |
| Mpz      | 2.08  | 1.06  | 1.6E-05 | 9.4E-07 | 17528     | myelin protein zero                                                        |
| Mpz2     | 0.29  | -1.79 | 7.2E-04 | 6.5E-05 | 14012     | myelin protein zero-like 2                                                 |
| Mras     | 1.60  | 0.68  | 1.6E-05 | 9.1E-07 | 17532     | muscle and microspikes RAS                                                 |
| Mrc1     | 1.57  | 0.65  | 1.9E-05 | 1.1E-06 | 17533     | mannose receptor, C type 1                                                 |
| Mrggprb1 | 12.65 | 3.66  | 1.2E-15 | 1.7E-17 | 233231    | MAS-related GPR, member B1                                                 |
| Mrggprb2 | 5.50  | 2.46  | 1.6E-14 | 2.5E-16 | 243979    | MAS-related GPR, member B2                                                 |
| Mrp12    | 1.82  | 0.86  | 1.1E-06 | 4.9E-08 | 55282     | mitochondrial ribosomal protein L12                                        |
| Mrp10    | 1.60  | 0.68  | 8.5E-07 | 3.7E-08 | 107734    | mitochondrial ribosomal protein L30                                        |
| Mrp13    | 1.52  | 0.60  | 1.7E-03 | 1.7E-04 | 66845     | mitochondrial ribosomal protein L33                                        |
| Mrp14    | 2.01  | 1.01  | 5.3E-10 | 1.5E-11 | 67270     | mitochondrial ribosomal protein L42                                        |
| Mrp147   | 1.54  | 0.62  | 5.2E-03 | 6.5E-04 | 74600     | mitochondrial ribosomal protein L47                                        |
| Mrp151   | 1.74  | 0.79  | 1.8E-09 | 5.2E-11 | 66493     | mitochondrial ribosomal protein L51                                        |
| Mrp153   | 1.60  | 0.68  | 3.0E-04 | 2.4E-05 | 68499     | mitochondrial ribosomal protein L53                                        |
| Mrsp28   | 1.53  | 0.61  | 3.9E-03 | 4.6E-04 | 66230     | mitochondrial ribosomal protein S28                                        |
| Mrsp35   | 1.78  | 0.83  | 1.4E-07 | 5.5E-09 | 232536    | mitochondrial ribosomal protein S35                                        |
| Msh6     | 0.65  | -0.62 | 2.1E-06 | 1.0E-07 | 17688     | mutS homolog 6                                                             |
| Msi1     | 0.55  | -0.86 | 4.1E-04 | 3.4E-05 | 17690     | Musashi homolog 1                                                          |
| Msi2     | 1.62  | 0.70  | 3.9E-03 | 4.7E-04 | 76626     | Musashi homolog 2                                                          |
| Msn      | 0.04  | -4.70 | 1.3E-41 | 1.7E-44 | 56047     | mesothelin                                                                 |
| Msmo1    | 0.54  | -0.89 | 1.4E-08 | 4.5E-10 | 66234     | methylsterol monooxygenase 1                                               |
| Msr1     | 1.63  | 0.70  | 5.8E-03 | 7.5E-04 | 20288     | macrophage scavenger receptor 1                                            |
| Msrb1    | 1.60  | 0.68  | 1.0E-03 | 9.5E-05 | 27361     | methionine sulfide reductase B1                                            |
| Msrb3    | 1.57  | 0.65  | 2.8E-06 | 1.4E-07 | 320183    | methionine sulfide reductase B3                                            |
| Msta     | 1.66  | 0.73  | 4.9E-04 | 4.2E-05 | 17700     | myostatin                                                                  |
| Mtl      | 2.15  | 1.11  | 5.7E-07 | 2.4E-08 | 17748     | metallothionein 1                                                          |
| Mt2      | 2.37  | 1.24  | 1.7E-06 | 8.0E-08 | 17750     | metallothionein 2                                                          |
| Mtfp1    | 2.36  | 1.24  | 1.4E-07 | 5.7E-09 | 67900     | mitochondrial fission process 1                                            |
| Mtm1     | 1.60  | 0.67  | 6.9E-03 | 9.1E-04 | 17772     | X-linked myotubular myopathy gene 1                                        |
| Mtus1    | 1.66  | 0.73  | 2.6E-06 | 1.3E-07 | 102103    | mitochondrial tumor suppressor 1                                           |

|          |       |       |         |         |                                |                                                                                |
|----------|-------|-------|---------|---------|--------------------------------|--------------------------------------------------------------------------------|
| Mtus2    | 4.08  | 2.03  | 1.1E-17 | 1.2E-19 | 77521                          | microtubule associated tumor suppressor candidate 2                            |
| Muc15    | 0.17  | -2.55 | 2.3E-03 | 2.5E-04 | 269328                         | mucin 15                                                                       |
| Murc     | 3.52  | 1.82  | 3.5E-18 | 3.9E-20 | 68016                          | muscle-related coiled-coil protein                                             |
| Mustn1   | 2.47  | 1.30  | 8.4E-14 | 1.5E-15 | 66175                          | musculoskeletal, embryonic nuclear protein 1                                   |
| Myadm12  | 5.39  | 2.43  | 1.0E-20 | 8.8E-23 | 68515                          | myeloid-associated differentiation marker-like 2                               |
| Mybpe1   | 5.21  | 2.38  | 2.6E-28 | 1.2E-30 | 109272                         | myosin binding protein C, slow-type                                            |
| Mybpe2   | 61.33 | 5.94  | 1.3E-74 | 3.0E-78 | 233199                         | myosin binding protein C, fast-type                                            |
| Mye      | 0.61  | -0.70 | 2.5E-06 | 1.2E-09 | 178609                         | myelocytomatosis oncogene                                                      |
| Myeov2   | 1.65  | 0.72  | 4.3E-03 | 5.2E-04 | 66915                          | myeloma overexpressed 2                                                        |
| Myf6     | 3.34  | 1.74  | 3.1E-17 | 3.8E-19 | 17878                          | myogenic factor 6                                                              |
| Myh1     | 3.42  | 1.78  | 1.9E-12 | 3.9E-14 | 17879                          | myosin, heavy polypeptide 1, skeletal muscle, adult                            |
| Myh11    | 3.05  | 1.61  | 3.2E-14 | 5.3E-16 | 17880                          | myosin, heavy polypeptide 11, smooth muscle                                    |
| Myh2     | 4.39  | 2.13  | 5.6E-06 | 3.0E-07 | 17882                          | myosin, heavy polypeptide 2, skeletal muscle, adult                            |
| Myh3     | 2.05  | 1.03  | 4.2E-07 | 1.8E-08 | 17883                          | myosin, heavy polypeptide 3, skeletal muscle, embryonic                        |
| Myh7     | 2.08  | 1.06  | 1.2E-07 | 4.5E-09 | 140781                         | myosin, heavy polypeptide 7, cardiac muscle, beta                              |
| Myh8     | 6.62  | 2.73  | 7.1E-33 | 2.0E-35 | 17885                          | myosin, heavy polypeptide 8, skeletal muscle, perinatal                        |
| MyI1     | 5.15  | 2.36  | 1.0E-31 | 3.2E-34 | 17901                          | myosin, light polypeptide 1                                                    |
| MyI2     | 4.25  | 2.09  | 8.4E-18 | 9.5E-20 | 17906                          | myosin, light polypeptide 2, regulatory, cardiac, slow                         |
| MyI3     | 2.84  | 1.50  | 5.4E-14 | 9.2E-16 | 17897                          | myosin, light polypeptide 3                                                    |
| MyI4     | 1.71  | 0.77  | 7.2E-05 | 4.9E-06 | 17896                          | myosin, light polypeptide 4                                                    |
| MyI9     | 2.30  | 1.20  | 4.5E-14 | 7.6E-16 | 98932                          | myosin, light polypeptide 9, regulatory                                        |
| MyIb2    | 4.99  | 2.32  | 6.8E-33 | 1.9E-35 | 228785                         | myosin, light polypeptide kinase 2, skeletal muscle                            |
| MyIb3    | 4.96  | 2.31  | 2.3E-35 | 3.4E-37 | 213435                         | myosin light chain kinase 3                                                    |
| MyIb4    | 2.33  | 1.22  | 1.1E-10 | 2.7E-12 | 238564                         | myosin light chain kinase family, member 4                                     |
| MyIpf    | 4.42  | 2.14  | 1.2E-22 | 8.8E-25 | 17907                          | myosin light chain, phosphorylatable, fast skeletal muscle                     |
| Myo18b   | 3.38  | -1.76 | 1.0E-17 | 1.2E-19 | 74376                          | myosin XVIIIb                                                                  |
| Myo19    | 0.65  | -0.62 | 5.2E-03 | 6.6E-04 | 66196                          | myosin XIX                                                                     |
| Myo5b    | 0.65  | -0.61 | 2.6E-03 | 2.9E-04 | 17919                          | myosin VB                                                                      |
| Myo5c    | 5.36  | 2.42  | 7.0E-18 | 7.7E-20 | 208943                         | myosin VC                                                                      |
| Myom1    | 3.26  | 1.70  | 1.2E-18 | 1.3E-20 | 17929                          | myomesin 1                                                                     |
| Myom2    | 3.52  | 1.82  | 3.4E-21 | 2.9E-23 | 17930                          | myomesin 2                                                                     |
| Myom3    | 2.24  | 1.17  | 7.3E-10 | 2.1E-11 | 242702                         | myomesin family, member 3                                                      |
| Myot     | 4.80  | 2.26  | 1.4E-26 | 7.4E-29 | 58916                          | myotilin                                                                       |
| Myoz1    | 7.69  | 2.94  | 3.5E-39 | 5.1E-42 | 59011                          | myozenin 1                                                                     |
| Myoz2    | 3.76  | 1.91  | 7.6E-18 | 8.5E-20 | 59006                          | myozenin 2                                                                     |
| Myoz3    | 7.83  | 2.97  | 4.8E-35 | 9.2E-38 | 179047                         | myozenin 3                                                                     |
| Mypm     | 3.09  | 1.63  | 1.4E-17 | 1.6E-19 | 68802                          | myopalladin                                                                    |
| Naaad2   | 1.59  | 0.67  | 4.1E-03 | 5.0E-04 | 72560                          | N-acetylated alpha-linked acidic dipeptidase 2                                 |
| Naca     | 1.98  | 0.98  | 2.1E-08 | 7.0E-10 | 17938                          | nascent polypeptide-associated complex alpha polypeptide                       |
| Nalcn    | 0.32  | -1.63 | 1.2E-05 | 6.8E-07 | 338370                         | sodium leak channel, non-selective                                             |
| Nampt    | 1.90  | 0.93  | 2.3E-09 | 7.0E-11 | 59027                          | nicotinamide phosphoribosyltransferase                                         |
| Napepld  | 1.73  | 0.79  | 2.5E-03 | 2.8E-04 | 242864                         | N-acyl phosphatidylethanolamine phospholipase D                                |
| Nasp     | 0.62  | -0.70 | 3.3E-07 | 1.4E-08 | 50927                          | nuclear autoantigenic sperm protein (histone-binding)                          |
| Nbeal2   | 0.39  | -1.36 | 5.7E-05 | 3.8E-06 | 235627                         | neurobeachin-like 2                                                            |
| Ncam1    | 2.11  | 1.08  | 1.1E-10 | 2.9E-12 | 17967                          | neural cell adhesion molecule 1                                                |
| Nceh1    | 1.84  | 0.88  | 1.7E-04 | 1.3E-05 | 320024                         | arylacacetamide deacetylase-like 1                                             |
| Ndrp2    | 4.05  | 2.02  | 3.1E-32 | 9.6E-35 | 29811                          | N-myc downstream regulated gene 2                                              |
| Ndufa1   | 1.68  | 0.75  | 2.1E-05 | 1.3E-06 | 54405                          | NADH dehydrogenase (ubiquinone) 1 alpha subcomplex, 1                          |
| Ndufa10  | 1.71  | 0.78  | 4.8E-09 | 1.5E-10 | 67273                          | NADH dehydrogenase (ubiquinone) 1 alpha subcomplex 10                          |
| Ndufa11  | 1.58  | 0.66  | 8.1E-06 | 4.4E-07 | 69875                          | NADH dehydrogenase (ubiquinone) 1 alpha subcomplex 11                          |
| Ndufa12  | 1.74  | 0.80  | 3.7E-05 | 2.4E-06 | 64414                          | NADH dehydrogenase (ubiquinone) 1 alpha subcomplex, 12                         |
| Ndufa13  | 1.60  | 0.67  | 9.8E-06 | 5.4E-07 | 67184                          | NADH dehydrogenase (ubiquinone) 1 alpha subcomplex, 13                         |
| Ndufa2   | 1.54  | 0.63  | 4.4E-05 | 2.8E-06 | 17991                          | NADH dehydrogenase (ubiquinone) 1 alpha subcomplex, 2                          |
| Ndufa4   | 1.68  | 0.75  | 3.5E-07 | 1.4E-08 | 17992                          | NADH dehydrogenase (ubiquinone) 1 alpha subcomplex, 4                          |
| Ndufa5   | 2.04  | 1.03  | 2.5E-11 | 5.9E-13 | 68202                          | NADH dehydrogenase (ubiquinone) 1 alpha subcomplex, 5                          |
| Ndufa6   | 2.04  | 1.03  | 5.3E-14 | 9.2E-16 | 67130                          | NADH dehydrogenase (ubiquinone) 1 alpha subcomplex, 6 (B14)                    |
| Ndufa8   | 1.87  | 0.91  | 2.1E-11 | 5.0E-13 | 68375                          | NADH dehydrogenase (ubiquinone) 1 alpha subcomplex, 8                          |
| Ndufa9   | 1.78  | 0.83  | 1.6E-09 | 4.8E-11 | 66108                          | NADH dehydrogenase (ubiquinone) 1 alpha subcomplex, 9                          |
| Ndufab1  | 1.67  | 0.74  | 1.4E-03 | 1.4E-04 | 70316                          | NADH dehydrogenase (ubiquinone) 1, alpha/beta subcomplex, 1                    |
| Ndufaf1  | 1.63  | 0.70  | 4.5E-04 | 3.8E-05 | 69702                          | NADH dehydrogenase (ubiquinone) 1 alpha subcomplex, assembly factor 1          |
| Ndufaf5  | 1.71  | 0.78  | 4.9E-04 | 4.2E-05 | 69487                          | NADH dehydrogenase (ubiquinone) complex I, assembly factor 5                   |
| Ndufb10  | 2.42  | 1.28  | 1.4E-17 | 1.6E-19 | 68342                          | NADH dehydrogenase (ubiquinone) 1 beta subcomplex, 10                          |
| Ndufb11  | 1.73  | 0.79  | 3.9E-08 | 1.4E-09 | 104130                         | NADH dehydrogenase (ubiquinone) 1 beta subcomplex, 11                          |
| Ndufb2   | 1.82  | 0.86  | 2.9E-05 | 1.8E-06 | 68198                          | NADH dehydrogenase (ubiquinone) 1 beta subcomplex, 2                           |
| Ndufb3   | 1.60  | 0.68  | 4.3E-06 | 2.4E-07 | 66495                          | NADH dehydrogenase (ubiquinone) 1 beta subcomplex, 3                           |
| Ndufb5   | 1.92  | 0.94  | 7.1E-12 | 1.6E-13 | 66846                          | NADH dehydrogenase (ubiquinone) 1 beta subcomplex, 5                           |
| Ndufb6   | 1.65  | 0.72  | 1.6E-06 | 7.5E-08 | 230075                         | NADH dehydrogenase (ubiquinone) 1 beta subcomplex, 6                           |
| Ndufb7   | 1.80  | 0.85  | 1.6E-09 | 4.8E-11 | 66916                          | NADH dehydrogenase (ubiquinone) 1 beta subcomplex, 7                           |
| Ndufb8   | 2.00  | 1.00  | 3.7E-11 | 8.9E-13 | 67264                          | NADH dehydrogenase (ubiquinone) 1 beta subcomplex, 8                           |
| Ndufb9   | 2.35  | 1.23  | 3.5E-16 | 4.5E-18 | 66218                          | NADH dehydrogenase (ubiquinone) 1 beta subcomplex, 9                           |
| Ndufc1   | 1.86  | 0.89  | 3.1E-06 | 1.5E-07 | 66377                          | NADH dehydrogenase (ubiquinone) 1, subcomplex unknown, 1                       |
| Ndufc2   | 1.76  | 0.82  | 1.7E-08 | 5.5E-10 | 68197                          | NADH dehydrogenase (ubiquinone) 1, subcomplex unknown, 2                       |
| Ndufs1   | 2.05  | 1.04  | 2.3E-13 | 4.3E-15 | 227197                         | NADH dehydrogenase (ubiquinone) Fe-S protein 1                                 |
| Ndufs2   | 1.77  | 0.82  | 6.2E-09 | 2.0E-10 | 226646                         | NADH dehydrogenase (ubiquinone) Fe-S protein 2                                 |
| Ndufs3   | 1.78  | 0.83  | 7.0E-07 | 3.0E-08 | 68349                          | NADH dehydrogenase (ubiquinone) Fe-S protein 3                                 |
| Ndufs4   | 1.89  | 0.92  | 1.2E-09 | 3.5E-11 | 17993                          | NADH dehydrogenase (ubiquinone) Fe-S protein 4                                 |
| Ndufs6   | 1.70  | 0.76  | 2.7E-05 | 1.7E-06 | 407785                         | NADH dehydrogenase (ubiquinone) Fe-S protein 6                                 |
| Ndufs7   | 1.91  | 0.93  | 1.9E-11 | 4.5E-13 | 75406                          | NADH dehydrogenase (ubiquinone) Fe-S protein 7                                 |
| Ndufs8   | 1.55  | 0.64  | 1.1E-05 | 6.2E-07 | 225887                         | NADH dehydrogenase (ubiquinone) Fe-S protein 8                                 |
| Nduf1    | 1.69  | 0.76  | 3.4E-08 | 1.2E-09 | 17995                          | NADH dehydrogenase (ubiquinone) flavoprotein 1                                 |
| Nduf2    | 2.08  | 1.06  | 3.6E-13 | 9.9E-15 | 72900                          | NADH dehydrogenase (ubiquinone) flavoprotein 2                                 |
| Nduf3    | 1.96  | 0.97  | 6.3E-12 | 1.4E-13 | 78330                          | NADH dehydrogenase (ubiquinone) flavoprotein 3                                 |
| Neb      | 3.46  | 1.79  | 1.1E-15 | 1.6E-17 | 17996                          | nebulin                                                                        |
| Nebi     | 0.18  | -2.46 | 7.1E-04 | 6.4E-05 | 74103                          | nebulin                                                                        |
| Necab2   | 0.43  | -1.22 | 9.2E-05 | 6.5E-06 | 117148                         | N-terminal EF-hand calcium binding protein 2                                   |
| Nefl     | 0.25  | -1.98 | 3.7E-13 | 7.2E-15 | 18039                          | neurofilament, light polypeptide                                               |
| Nefm     | 0.29  | -1.78 | 4.7E-10 | 1.3E-11 | 18040                          | neurofilament, medium polypeptide                                              |
| Nell1    | 0.60  | -0.73 | 4.7E-03 | 5.7E-04 | 338352                         | NEL-like 1                                                                     |
| Nell2    | 0.49  | -1.02 | 1.3E-03 | 1.2E-04 | 54003                          | NEL-like 2                                                                     |
| Neur1a   | 1.65  | 0.73  | 1.5E-04 | 1.1E-05 | 18011                          | neuronalized homolog 1A                                                        |
| Neur2    | 2.60  | 1.38  | 1.0E-11 | 2.4E-13 | 415115                         | neuronalized-like 2                                                            |
| Nexn     | 2.61  | 1.38  | 4.0E-13 | 7.8E-15 | 68810                          | nexilin                                                                        |
| Nfate4   | 0.64  | -0.64 | 2.9E-05 | 1.8E-06 | 73181                          | nuclear factor of activated T cells, cytoplasmic, calcineurin dependent 4      |
| Nfu1     | 1.50  | 0.59  | 6.9E-03 | 9.2E-04 | 56748                          | NFU1 iron-sulfur cluster scaffold homolog                                      |
| Ngp      | 3.97  | 1.99  | 1.3E-06 | 5.8E-08 | 18054                          | neutrophilic granule protein                                                   |
| Nid1     | 1.65  | 0.72  | 7.5E-07 | 3.3E-08 | 18073                          | nidogen 1                                                                      |
| Ninj1    | 1.63  | 0.71  | 5.6E-05 | 3.8E-06 | 18081                          | ninjurin 1                                                                     |
| Nipa2    | 0.41  | -1.30 | 4.4E-03 | 5.4E-04 | 223473                         | NIPA-like domain containing 2                                                  |
| Nipsnap1 | 0.63  | -0.68 | 2.0E-03 | 2.2E-04 | 18082                          | 4-nitrophenylphosphatase domain and non-neuronal SNAP25-like protein homolog 1 |
| Nkain1   | 0.58  | -0.78 | 6.8E-06 | 3.6E-07 | 67149                          | Na <sup>+</sup> /K <sup>+</sup> transporting ATPase interacting 1              |
| Nkd1     | 0.58  | -0.79 | 1.1E-06 | 4.9E-08 | 93960                          | naked cuticle 1 homolog                                                        |
| Nkd2     | 0.50  | -0.99 | 4.3E-04 | 3.6E-05 | 72293                          | naked cuticle 2 homolog                                                        |
| Nkiras1  | 1.56  | 0.65  | 6.1E-06 | 3.2E-07 | 69721                          | NFKB inhibitor interacting Ras-like protein 1                                  |
| Nkx6-2   | 1.71  | 0.78  | 2.1E-03 | 2.3E-04 | 14912                          | NK6 homeobox 2                                                                 |
| Nlgn3    | 0.53  | -0.91 | 1.5E-04 | 1.1E-05 | 245537                         | neuroligin 3                                                                   |
| Nmnat2   | 0.48  | -1.06 | 2.0E-04 | 1.5E-05 | 226518                         | nicotinamide nucleotide adenyltransferase 2                                    |
| Nmnat3   | 2.20  | 1.14  | 2.5E-03 | 2.8E-04 | 74080                          | nicotinamide nucleotide adenyltransferase 3                                    |
| Nmnr2    | 2.23  | 1.16  | 1.0E-03 | 1.0E-04 | 69564                          | nicotinamide riboside kinase 2                                                 |
| Nnat     | 0.54  | -0.89 | 6.3E-08 | 2.4E-09 | 18111                          | neuronaligin                                                                   |
| Nnmt     | 2.27  | 1.18  | 3.1E-06 | 1.5E-07 | 18113                          | nicotinamide N-methyltransferase                                               |
| Nat      | 1.97  | 0.98  | 2.2E-05 | 1.3E-06 | 18115                          | nicotinamide nucleotide transhydrogenase                                       |
| Nol3     | 1.97  | 0.98  | 2.0E-09 | 5.8E-11 | 78688                          | nucleolar protein 3 (apoptosis repressor with CARD domain)                     |
| Nol9     | 0.63  | -0.67 | 8.0E-04 | 7.4E-05 | 74035                          | nucleolar protein 9                                                            |
| Nop56    | 0.61  | -0.71 | 1.8E-07 | 7.3E-09 | 67134                          | NOP56 ribonucleoprotein homolog                                                |
| Nos1     | 4.18  | 2.06  | 2.8E-14 | 4.7E-16 | 18125                          | nitric oxide synthase 1, neuronal                                              |
| Npepl1   | 1.78  | 0.83  | 6.9E-10 | 1.9E-11 | 228961                         | aminopeptidase-like 1                                                          |
| Npr1     | 1.63  | 0.71  | 7.7E-05 | 5.4E-06 | 18160                          | natriuretic peptide receptor 1                                                 |
| Nptx2    | 0.23  | -2.10 | 2.8E-12 | 6.0E-14 | 53324                          | neuronal pentraxin 2                                                           |
| Nqo2     | 1.52  | 0.60  | 4.2E-03 | 5.0E-04 | 18105                          | NAD(P)H dehydrogenase, quinone 2                                               |
| Nr1d1    | 1.84  | 0.88  | 6.5E-09 | 2.1E-10 | 217166                         | nuclear receptor subfamily 1, group D, member 1                                |
| Nr1d2    | 2.65  | 1.41  | 8.9E-16 | 1.2E-17 | 353187                         | nuclear receptor subfamily 1, group D, member 2                                |
| Nr1h3    | 2.56  | 1.35  | 1.6E-04 | 1.2E-05 | 22259                          | nuclear receptor subfamily 1, group H, member 3                                |
| Nr3c2    | 1.73  | 0.79  | 2.8E-03 | 3.1E-04 | 110784                         | nuclear receptor subfamily 3, group C, member 2                                |
| Nr4a1    | 1.64  | 0.71  | 2.4E-06 | 1.1E-07 | 15379                          | nuclear receptor subfamily 4, group A, member 1                                |
| Nrap     | 4.18  | 2.06  | 5.8E-22 | 4.5E-24 | 18175                          | nebulin-related anchoring protein                                              |
| Nrgn     | 0.55  | -0.86 | 2.6E-03 | 2.9E-04 | 64011                          | neurogranin                                                                    |
| Nrk      | 1.57  | 0.65  | 1.6E-03 | 1.7E-04 | 27206                          | Nik related kinase                                                             |
| Nrxn1    | 0.42  | -1.24 | 1.9E-04 | 1.5E-05 | 18189                          | neurexin I                                                                     |
| Nt5c2    | 1.50  | 0.59  | 1.5E-04 | 1.1E-05 | 76952                          | 5'-nucleotidase, cytosolic II                                                  |
| Nt5c3    | 2.18  | 1.12  | 2.7E-08 | 107569  | 5'-nucleotidase, cytosolic III |                                                                                |
| Nt5dc3   | 1.82  | 0.86  | 9.9E-06 | 5.4E-07 | 103466                         | 5'-nucleotidase domain containing 3                                            |

|          |       |       |         |         |        |                                                                                                             |
|----------|-------|-------|---------|---------|--------|-------------------------------------------------------------------------------------------------------------|
| Nt5e     | 0.57  | -0.82 | 2.2E-03 | 2.3E-04 | 23959  | 5' nucleotidase, ecto                                                                                       |
| Ntn3     | 0.58  | -0.78 | 4.9E-04 | 4.2E-05 | 18209  | netrin 3                                                                                                    |
| Ntng1    | 0.51  | -0.96 | 1.8E-03 | 1.9E-04 | 80883  | netrin G1                                                                                                   |
| Nudt3    | 1.57  | 0.65  | 4.6E-06 | 2.4E-07 | 56409  | nudix (nucleotide diphosphate linked moiety X)-type motif 3                                                 |
| Nudt4    | 1.85  | 0.88  | 1.8E-09 | 5.2E-11 | 71207  | nudix (nucleoside diphosphate linked moiety X)-type motif 4                                                 |
| Nyap1    | 0.55  | -0.86 | 1.8E-03 | 1.8E-04 | 243300 | neuronal tyrosine-phosphorylated phosphoinositide 3-kinase adaptor 1                                        |
| Nymrin   | 0.66  | -0.60 | 3.3E-05 | 2.1E-06 | 277154 | NYN domain and retroviral integrase containing                                                              |
| Obscn    | 2.83  | 1.59  | 9.7E-15 | 1.5E-16 | 380698 | obscurin, cytoskeletal catmodulin and titin-interacting RhoGEF                                              |
| Ocln     | 0.22  | -2.18 | 7.1E-04 | 6.4E-05 | 18260  | occludin                                                                                                    |
| Odf3l1   | 2.32  | 1.22  | 2.0E-04 | 1.5E-05 | 382075 | outer dense fiber of sperm tails 3-like 1                                                                   |
| Ogdh     | 1.76  | 0.81  | 3.3E-08 | 1.2E-09 | 18293  | oxoglutarate dehydrogenase (lipoamide)                                                                      |
| Olfm4    | 7.33  | 2.87  | 7.5E-12 | 1.7E-13 | 380924 | olfactomedin 4                                                                                              |
| Olfml2a  | 1.97  | 0.98  | 4.8E-04 | 4.1E-05 | 241327 | olfactomedin-like 2A                                                                                        |
| Olfrl558 | 2.05  | 1.04  | 3.5E-05 | 2.2E-06 | 259097 | olfactory receptor 558                                                                                      |
| Oma1     | 1.64  | 0.72  | 1.7E-03 | 1.7E-04 | 67013  | OMA1 homolog, zinc metalloproteinase                                                                        |
| Orai1    | 1.72  | 0.78  | 1.7E-05 | 9.8E-07 | 109305 | ORAI calcium release-activated calcium modulator 1                                                          |
| Orc1     | 0.54  | -0.88 | 3.9E-04 | 3.2E-05 | 18392  | origin recognition complex, subunit 1                                                                       |
| Oxd1     | 2.90  | 1.54  | 5.9E-09 | 1.9E-10 | 66431  | oxidoreductase like domain containing 1                                                                     |
| Oxsnad1  | 1.82  | 0.86  | 1.4E-06 | 6.4E-08 | 218885 | oxidoreductase NAD-binding domain containing 1                                                              |
| Oxsm     | 1.59  | 0.67  | 1.8E-03 | 1.9E-04 | 71147  | 3-oxoacyl-ACP synthase, mitochondrial                                                                       |
| P2rx5    | 2.41  | 1.27  | 1.2E-06 | 5.6E-08 | 94045  | purinergic receptor P2X, ligand-gated ion channel, 5                                                        |
| P2rx6    | 2.73  | 1.45  | 2.2E-06 | 1.1E-07 | 18440  | purinergic receptor P2X, ligand-gated ion channel, 6                                                        |
| P2rx7    | 1.90  | 0.93  | 7.3E-04 | 6.7E-05 | 18439  | purinergic receptor P2X, ligand-gated ion channel, 7                                                        |
| P2ry1    | 1.69  | 0.75  | 2.3E-03 | 2.5E-04 | 18441  | purinergic receptor P2Y, G-protein coupled 1                                                                |
| P2ry2    | 3.00  | 1.59  | 2.9E-10 | 7.8E-12 | 18442  | purinergic receptor P2Y, G-protein coupled 2                                                                |
| Pacrg    | 2.85  | 1.51  | 8.1E-06 | 4.4E-07 | 69310  | PARK2 co-regulated                                                                                          |
| Pacsin3  | 2.45  | 1.30  | 2.4E-15 | 3.5E-17 | 80708  | protein kinase C and casein kinase substrate in neurons 3                                                   |
| Padi2    | 2.99  | 1.58  | 1.6E-23 | 1.1E-25 | 18600  | peptidyl arginine deiminase, type II                                                                        |
| Pak1     | 2.13  | 1.09  | 1.5E-10 | 3.9E-12 | 18479  | p21 protein (Cdc2/Rac)-activated kinase 1                                                                   |
| Pank1    | 1.51  | 0.59  | 2.0E-03 | 2.2E-04 | 75735  | pantothenate kinase 1                                                                                       |
| Papss1   | 0.66  | -0.60 | 1.6E-05 | 9.3E-07 | 23971  | 3'-phosphoadenosine 5'-phosphosulfate synthase 1                                                            |
| Papss2   | 0.65  | -0.62 | 2.5E-03 | 2.8E-04 | 23972  | 3'-phosphoadenosine 5'-phosphosulfate synthase 2                                                            |
| Paqr5    | 0.23  | -2.11 | 4.1E-03 | 4.8E-04 | 74090  | progesterin and adipoQ receptor family member V                                                             |
| Par6g    | 0.65  | -0.63 | 4.3E-05 | 2.8E-06 | 93737  | par-6 partitioning defective 6 homolog gamma                                                                |
| Park2    | 1.71  | 0.77  | 6.0E-03 | 7.8E-04 | 50873  | Parkinson disease (autosomal recessive, juvenile) 2, parkin                                                 |
| Parp10   | 1.78  | 0.83  | 6.4E-03 | 8.3E-04 | 671325 | poly (ADP-ribose) polymerase family, member 10                                                              |
| Parp14   | 0.80  | 0.85  | 5.4E-04 | 4.7E-05 | 547253 | poly (ADP-ribose) polymerase family, member 14                                                              |
| Parp4    | 1.62  | 0.70  | 1.2E-04 | 8.6E-06 | 328417 | poly (ADP-ribose) polymerase family, member 4                                                               |
| Parv3    | 2.64  | 1.40  | 5.1E-18 | 5.6E-20 | 170736 | parvin, beta                                                                                                |
| Pbxip1   | 2.89  | 1.53  | 2.5E-22 | 1.9E-24 | 229534 | pre B cell leukemia transcription factor interacting protein 1                                              |
| Pcbd1    | 1.85  | 0.89  | 2.0E-03 | 2.1E-04 | 13180  | pterin 4 alpha carbinolamine dehydratase/dimerization cofactor of hepatocyte nuclear factor 1 alpha (TCF) 1 |
| Pcdh10   | 0.25  | -1.99 | 3.0E-11 | 7.2E-13 | 18526  | protocadherin 10                                                                                            |
| Pcdh9    | 0.56  | -0.83 | 2.0E-03 | 2.2E-04 | 211712 | protocadherin 9                                                                                             |
| Pcdha1   | 0.54  | -0.90 | 9.9E-04 | 9.4E-05 | 116731 | protocadherin alpha 1                                                                                       |
| Pcdha10  | 0.55  | -0.87 | 1.5E-03 | 1.5E-04 | 12943  | protocadherin alpha 10                                                                                      |
| Pcdha11  | 0.53  | -0.91 | 7.7E-04 | 7.0E-05 | 12942  | protocadherin alpha 11                                                                                      |
| Pcdha12  | 0.53  | -0.93 | 5.4E-04 | 4.7E-05 | 192164 | protocadherin alpha 12                                                                                      |
| Pcdha2   | 0.54  | -0.89 | 1.1E-03 | 1.1E-04 | 353234 | protocadherin alpha 2                                                                                       |
| Pcdha3   | 0.54  | -0.88 | 1.3E-03 | 1.2E-04 | 192163 | protocadherin alpha 3                                                                                       |
| Pcdha4   | 0.54  | -0.89 | 1.2E-03 | 1.1E-04 | 12936  | protocadherin alpha 4                                                                                       |
| Pcdha5   | 0.54  | -0.88 | 1.1E-03 | 1.0E-04 | 12941  | protocadherin alpha 5                                                                                       |
| Pcdha6   | 0.54  | -0.89 | 1.2E-03 | 1.1E-04 | 12937  | protocadherin alpha 6                                                                                       |
| Pcdha7   | 0.54  | -0.89 | 1.2E-03 | 1.1E-04 | 12939  | protocadherin alpha 7                                                                                       |
| Pcdha8   | 0.54  | -0.90 | 9.2E-04 | 8.6E-05 | 353235 | protocadherin alpha 8                                                                                       |
| Pcdha9   | 0.54  | -0.88 | 1.3E-03 | 1.2E-04 | 192161 | protocadherin alpha 9                                                                                       |
| Pcdhacl  | 0.54  | -0.88 | 1.2E-03 | 1.2E-04 | 353236 | protocadherin alpha subfamily C, 1                                                                          |
| Pcdhacl2 | 0.51  | -0.97 | 6.8E-05 | 4.6E-06 | 353237 | protocadherin alpha subfamily C, 2                                                                          |
| Pcna     | 0.64  | -0.64 | 5.6E-05 | 3.7E-06 | 18538  | proliferating cell nuclear antigen                                                                          |
| Pcnt     | 1.65  | 0.72  | 1.0E-06 | 4.6E-08 | 18541  | pericentrin (kendrin)                                                                                       |
| Pesk9    | 0.49  | -1.04 | 4.3E-03 | 5.1E-04 | 100102 | proprotein convertase subtilisin/kexin type 9                                                               |
| Pcx      | 1.88  | 0.91  | 5.0E-03 | 6.3E-04 | 18563  | pyruvate carboxylase                                                                                        |
| Pde4b    | 2.08  | 1.06  | 9.3E-09 | 3.0E-10 | 18578  | phosphodiesterase 4B, cAMP specific                                                                         |
| Pde4d    | 2.02  | 1.02  | 6.0E-15 | 9.2E-17 | 238871 | phosphodiesterase 4D, cAMP specific                                                                         |
| Pde4dip  | 3.69  | 1.88  | 1.8E-24 | 1.2E-26 | 83679  | phosphodiesterase 4D interacting protein (myomegalin)                                                       |
| Pde6d    | 1.61  | 0.69  | 3.8E-05 | 2.4E-06 | 18582  | platelet derived growth factor, beta                                                                        |
| Pdgfra   | 1.54  | 0.62  | 1.9E-05 | 1.1E-06 | 18591  | platelet-derived growth factor, beta polypeptide                                                            |
| Pdgfrb   | 0.67  | -0.59 | 1.4E-04 | 1.0E-05 | 54635  | platelet-derived growth factor, beta polypeptide                                                            |
| Pdha1    | 2.17  | 1.12  | 4.9E-15 | 7.5E-17 | 18597  | pyruvate dehydrogenase E1 alpha 1                                                                           |
| Pdhh     | 2.17  | 1.12  | 7.5E-16 | 1.0E-17 | 68263  | pyruvate dehydrogenase (lipoamide) beta                                                                     |
| Pdhx     | 1.84  | 0.88  | 6.0E-08 | 2.2E-09 | 27402  | pyruvate dehydrogenase complex, component X                                                                 |
| Pdia4    | 0.60  | -0.75 | 7.1E-08 | 2.6E-09 | 12304  | protein disulfide isomerase associated 4                                                                    |
| Pdk1     | 1.84  | 0.88  | 8.4E-11 | 2.1E-12 | 228026 | pyruvate dehydrogenase kinase, isoenzyme 1                                                                  |
| Pdk2     | 3.45  | 1.78  | 4.8E-35 | 9.4E-38 | 18604  | pyruvate dehydrogenase kinase, isoenzyme 2                                                                  |
| Pdk4     | 5.38  | 2.43  | 1.7E-48 | 1.3E-51 | 27273  | pyruvate dehydrogenase kinase, isoenzyme 4                                                                  |
| Pdlim1   | 1.74  | 0.80  | 6.0E-08 | 2.2E-09 | 54132  | PDZ and LIM domain 1 (elfin)                                                                                |
| Pdlim3   | 2.82  | 1.50  | 8.4E-18 | 9.6E-20 | 53318  | PDZ and LIM domain 3                                                                                        |
| Pdlim5   | 4.74  | 2.24  | 2.5E-26 | 1.4E-28 | 56376  | PDZ and LIM domain 5                                                                                        |
| Pdlim7   | 2.01  | 1.01  | 6.6E-10 | 1.8E-11 | 67399  | PDZ and LIM domain 7                                                                                        |
| Pdp1     | 1.63  | 0.71  | 1.5E-04 | 1.1E-05 | 381511 | pyruvate dehydrogenase phosphatase catalytic subunit 1                                                      |
| Pdpr1    | 1.54  | 0.62  | 1.6E-03 | 1.6E-04 | 18607  | 3-phosphoinositide dependent protein kinase 1                                                               |
| Pdpr     | 1.53  | 0.61  | 6.1E-03 | 8.0E-04 | 319518 | pyruvate dehydrogenase phosphatase regulatory subunit                                                       |
| Pds2     | 1.95  | 0.96  | 3.2E-05 | 2.0E-06 | 71365  | prenyl (solanesyl) diphosphate synthase, subunit 2                                                          |
| Pdzd4    | 0.63  | -0.68 | 2.1E-04 | 1.6E-05 | 245469 | PDZ domain containing 4                                                                                     |
| Pdzd9    | 2.53  | 1.34  | 6.5E-07 | 2.8E-08 | 67983  | PDZ domain containing 9                                                                                     |
| Pdzk1ip1 | 0.19  | -2.38 | 4.5E-03 | 5.5E-04 | 67182  | PDZK1 interacting protein 1                                                                                 |
| Pecam1   | 1.60  | 0.68  | 4.0E-07 | 1.7E-08 | 18613  | platelet/endothelial cell adhesion molecule 1                                                               |
| Pent     | 3.10  | 1.63  | 6.4E-07 | 2.8E-08 | 18618  | phosphatidylethanolamine N-methyltransferase                                                                |
| Per1     | 1.54  | 0.62  | 9.2E-06 | 5.1E-07 | 18626  | period homolog 1                                                                                            |
| Perml    | 1.98  | 0.98  | 2.0E-10 | 5.4E-12 | 74183  | PPARGC1 and ESRR induced regulator, muscle 1                                                                |
| Pf4      | 1.88  | 0.91  | 2.3E-07 | 9.2E-09 | 56744  | platelet factor 4                                                                                           |
| Pfkfb4   | 1.64  | 0.71  | 3.6E-04 | 3.0E-05 | 270198 | 6-phosphofructo-2-kinase/fructose-2,6-bisphosphatase 4                                                      |
| Pfkm     | 3.42  | 1.77  | 6.6E-26 | 4.0E-28 | 18642  | phosphofructokinase, muscle                                                                                 |
| Pfkip    | 1.77  | 0.82  | 8.7E-11 | 2.2E-12 | 56421  | phosphofructokinase, platelet                                                                               |
| Pgam2    | 4.27  | 2.19  | 4.2E-29 | 1.8E-31 | 56012  | phosphoglycerate mutase 2                                                                                   |
| Pgk1     | 1.59  | 0.67  | 3.5E-06 | 1.7E-07 | 18655  | phosphoglycerate kinase 1                                                                                   |
| Pgm2     | 4.03  | 2.01  | 2.8E-37 | 4.5E-40 | 72157  | phosphoglucosmutase 2                                                                                       |
| Pgpep1   | 1.59  | 0.67  | 3.8E-07 | 1.6E-08 | 66522  | pyroglutaryl-peptidase I                                                                                    |
| Pghdh    | 0.57  | -0.81 | 1.2E-03 | 1.1E-04 | 236539 | 3-phosphoglycerate dehydrogenase                                                                            |
| Phka1    | 1.74  | 0.80  | 6.4E-06 | 3.4E-07 | 18679  | phosphorylase kinase alpha 1                                                                                |
| Phkb     | 1.69  | 0.76  | 4.9E-08 | 1.8E-09 | 102093 | phosphorylase kinase beta                                                                                   |
| Phkg1    | 6.97  | 2.80  | 7.2E-29 | 3.1E-31 | 18682  | phosphorylase kinase gamma 1                                                                                |
| Phldb3   | 0.30  | -1.73 | 2.4E-04 | 1.9E-05 | 232970 | pleckstrin homology-like domain, family B, member 3                                                         |
| Phtf2    | 2.17  | 1.12  | 2.0E-13 | 3.7E-15 | 68770  | putative homeodomain transcription factor 2                                                                 |
| Phyh     | 1.57  | 0.65  | 5.4E-03 | 6.9E-04 | 16922  | phytanoyl-CoA hydroxylase                                                                                   |
| Phyhd1   | 2.45  | 1.29  | 1.3E-08 | 4.4E-10 | 227696 | phytanoyl-CoA dioxygenase domain containing 1                                                               |
| Phyhip   | 0.33  | -1.62 | 5.1E-03 | 6.4E-04 | 105653 | phytanoyl-CoA hydroxylase interacting protein                                                               |
| Pil5     | 1.91  | 0.94  | 2.4E-04 | 1.9E-05 | 94227  | peptidase inhibitor 15                                                                                      |
| Pil6     | 2.32  | 1.21  | 2.1E-08 | 7.2E-10 | 74116  | peptidase inhibitor 16                                                                                      |
| Piemp    | 0.36  | -1.47 | 1.8E-05 | 1.1E-06 | 319352 | PIR alpha associated neural protein                                                                         |
| Piezo2   | 0.55  | -0.87 | 6.7E-08 | 2.5E-09 | 667742 | piezo-type mechanosensitive ion channel component 2                                                         |
| Pigh     | 0.52  | -0.94 | 1.4E-05 | 7.7E-07 | 110417 | phosphatidylinositol glycan anchor biosynthesis, class II                                                   |
| Pign     | 2.04  | 1.03  | 9.9E-09 | 3.2E-10 | 56176  | phosphatidylinositol glycan anchor biosynthesis, class P                                                    |
| Pik3c2b  | 1.61  | 0.69  | 1.0E-06 | 4.7E-08 | 240752 | phosphoinositide-3-kinase, class 2, beta polypeptide                                                        |
| Pik3ip1  | 1.66  | 0.73  | 2.6E-03 | 2.8E-04 | 216505 | phosphoinositide-3-kinase interacting protein 1                                                             |
| Pilra    | 1.97  | 0.98  | 8.3E-04 | 7.7E-05 | 231805 | paired immunoglobulin-like type 2 receptor alpha                                                            |
| Pink1    | 1.71  | 0.77  | 1.1E-07 | 4.2E-09 | 68943  | PTEN induced putative kinase 1                                                                              |
| Pisd-ps1 | 0.62  | -0.69 | 3.9E-03 | 4.7E-04 | 236604 | phosphatidylserine decarboxylase, pseudogene 1                                                              |
| Pitpnc1  | 2.35  | 1.23  | 8.5E-19 | 8.7E-21 | 71795  | phosphatidylinositol transfer protein, cytoplasmic 1                                                        |
| Pitx1    | 0.47  | -1.09 | 7.3E-05 | 5.0E-06 | 18740  | paired-like homeodomain transcription factor 1                                                              |
| Pitx2    | 1.83  | 0.87  | 3.6E-05 | 2.3E-06 | 18741  | paired-like homeodomain transcription factor 2                                                              |
| Pja2     | 1.89  | 0.91  | 8.3E-09 | 2.7E-10 | 224938 | praja 2, RING-H2 motif containing                                                                           |
| Pkhd1    | 2.04  | 1.03  | 1.7E-03 | 1.7E-04 | 241035 | polycystic kidney and hepatic disease 1                                                                     |
| Pkia     | 2.11  | 1.08  | 2.8E-09 | 8.5E-11 | 18767  | protein kinase inhibitor, alpha                                                                             |
| Pkig     | 1.76  | 0.82  | 2.3E-07 | 9.2E-09 | 18769  | pyruvate kinase, gamma                                                                                      |
| Pkm      | 1.80  | 0.85  | 1.1E-09 | 3.2E-11 | 18746  | pyruvate kinase, muscle                                                                                     |
| Pla2g12a | 1.82  | 0.87  | 1.9E-05 | 1.1E-06 | 66350  | phospholipase A2, group X1A                                                                                 |
| Pla2g16  | 2.42  | 1.28  | 7.7E-16 | 1.1E-17 | 225845 | phospholipase A2, group XVI                                                                                 |
| Pla2g3   | 0.25  | -1.99 | 4.1E-03 | 5.0E-04 | 237625 | phospholipase A2, group III                                                                                 |
| Pla2g7   | 2.50  | 1.32  | 4.0E-09 | 1.2E-10 | 27226  | phospholipase A2, group VII (platelet-activating factor acetylhydrolase, plasma)                            |
| Pla2r1   | 1.99  | 0.99  | 5.0E-04 | 4.3E-05 | 18779  | phospholipase A2 receptor 1                                                                                 |
| Plcd4    | 11.60 | 3.54  | 2.5E-34 | 5.5E-37 | 18802  | phospholipase C, delta 4                                                                                    |

|           |       |       |         |         |           |                                                                                                           |
|-----------|-------|-------|---------|---------|-----------|-----------------------------------------------------------------------------------------------------------|
| Plec      | 1.57  | 0.65  | 5.8E-05 | 3.9E-06 | 18810     | plectin                                                                                                   |
| Pleckha8  | 0.66  | -0.60 | 2.3E-03 | 2.5E-04 | 231999    | pleckstrin homology domain containing, family A (phosphoinositide binding specific) member 8              |
| Pleckhf1  | 1.62  | 0.69  | 5.1E-03 | 6.3E-04 | 72887     | pleckstrin homology domain containing, family F (with FYVE domain) member 1                               |
| Pleckhh1  | 0.41  | -1.30 | 2.7E-12 | 5.8E-14 | 211945    | pleckstrin homology domain containing, family H (with MyTH4 domain) member 1                              |
| Pleckh1   | 1.67  | 0.74  | 2.7E-06 | 1.3E-07 | 67220     | pleckstrin homology domain containing, family O member 1                                                  |
| Plet1     | 0.26  | -1.96 | 1.7E-04 | 1.3E-05 | 76509     | placenta expressed transcript 1                                                                           |
| Plin4     | 77.81 | 6.28  | 5.0E-55 | 2.0E-58 | 57435     | perilipin 4                                                                                               |
| Plin5     | 21.69 | 4.99  | 3.9E-48 | 3.2E-51 | 64965     | perilipin 5                                                                                               |
| Plip      | 0.17  | -2.55 | 1.4E-19 | 1.3E-21 | 67801     | plasma membrane proteolipid                                                                               |
| Plp1      | 1.59  | 0.67  | 7.0E-03 | 9.4E-04 | 18823     | proteolipid protein (myelin) 1                                                                            |
| Ppppr3    | 0.39  | -1.37 | 3.2E-08 | 1.1E-09 | 216152    | phospholipid phosphatase related 3                                                                        |
| Plscr4    | 1.80  | 0.84  | 6.2E-04 | 5.4E-05 | 235527    | phospholipid scramblase 4                                                                                 |
| Plxnb1    | 0.54  | -0.90 | 2.6E-08 | 8.9E-10 | 235611    | plexin B1                                                                                                 |
| Plxnb3    | 1.72  | 0.78  | 4.0E-03 | 4.7E-04 | 140571    | plexin B3                                                                                                 |
| Pm20d2    | 2.89  | 1.53  | 3.1E-14 | 5.2E-16 | 242377    | peptidase M20 domain containing 2                                                                         |
| Pnck      | 1.89  | 0.92  | 8.0E-05 | 5.6E-06 | 93843     | pregnancy upregulated non-ubiquitously expressed CaM kinase                                               |
| Pnk4      | 1.73  | 0.79  | 5.0E-04 | 4.3E-05 | 56695     | paroxysmal nonkinesigenic dyskinesia                                                                      |
| Pnpla2    | 4.82  | 2.27  | 7.5E-09 | 2.4E-10 | 66853     | patatin-like phospholipase domain containing 2                                                            |
| Podxl     | 1.56  | 0.64  | 5.8E-06 | 3.0E-07 | 27205     | podocyalxin-like                                                                                          |
| Pole2     | 0.66  | -0.61 | 6.6E-03 | 8.7E-04 | 18974     | polymerase (DNA directed), epsilon 2 (p59 subunit)                                                        |
| Poir3g    | 0.31  | -1.67 | 1.0E-05 | 5.5E-07 | 67486     | polymerase (RNA III) (DNA directed) poly peptide G                                                        |
| Pp1       | 0.58  | -0.78 | 4.8E-05 | 3.1E-06 | 67724     | processing of precursor 1, ribonuclease P/MRP family                                                      |
| Popdc2    | 2.60  | 1.38  | 6.4E-14 | 1.1E-15 | 64082     | poppe domain containing 2                                                                                 |
| Popdc3    | 3.44  | 1.78  | 2.1E-14 | 3.4E-16 | 78977     | poppe domain containing 3                                                                                 |
| Ppa2      | 1.77  | 0.83  | 1.8E-06 | 8.4E-08 | 74776     | pyrophosphatase (inorganic) 2                                                                             |
| Ppap2a    | 1.57  | 0.65  | 1.1E-05 | 6.4E-07 | 19012     | phosphatidic acid phosphatase type 2A                                                                     |
| Ppap2c    | 0.52  | -0.93 | 1.2E-03 | 1.1E-04 | 50784     | phosphatidic acid phosphatase type 2C                                                                     |
| Ppapdc3   | 2.36  | 1.24  | 1.9E-11 | 4.6E-13 | 227721    | phosphatidic acid phosphatase type 2 domain containing 3                                                  |
| Ppara     | 6.96  | 2.80  | 2.5E-49 | 1.6E-52 | 19013     | peroxisome proliferator activated receptor alpha                                                          |
| Pparg     | 4.10  | 2.04  | 7.7E-05 | 5.4E-06 | 19016     | peroxisome proliferator activated receptor gamma                                                          |
| Ppargc1a  | 3.45  | 1.78  | 1.1E-19 | 1.0E-21 | 19017     | peroxisome proliferative activated receptor, gamma, coactivator 1 alpha                                   |
| Ppargc1b  | 2.25  | 1.17  | 2.6E-07 | 1.1E-08 | 170826    | peroxisome proliferative activated receptor, gamma, coactivator 1 beta                                    |
| Ppfia3    | 0.35  | -1.53 | 4.4E-03 | 5.3E-04 | 76787     | protein tyrosine phosphatase, receptor type, f polypeptide (PTPRF), interacting protein (liprin), alpha 3 |
| Ppif      | 1.52  | 0.60  | 1.2E-03 | 1.2E-04 | 105675    | peptidylprolyl isomerase F (cyclophilin F)                                                                |
| Ppm1b     | 1.58  | 0.66  | 1.2E-04 | 8.6E-06 | 19043     | protein phosphatase 1B, magnesium dependent, beta isoform                                                 |
| Ppm1j     | 2.37  | 1.24  | 4.2E-06 | 2.2E-07 | 71887     | protein phosphatase 1j                                                                                    |
| Ppm1k     | 1.15  | 1.28  | 5.1E-06 | 2.7E-07 | 243382    | protein phosphatase 1k (PP2C domain containing)                                                           |
| Ppp1r12b  | 2.21  | 1.65  | 5.6E-22 | 4.4E-24 | 332951    | protein phosphatase 1, regulatory (inhibitor) subunit 12B                                                 |
| Ppp1r13l  | 0.43  | -1.22 | 1.3E-04 | 9.8E-06 | 333654    | protein phosphatase 1, regulatory (inhibitor) subunit 13 like                                             |
| Ppp1r14c  | 3.56  | 1.83  | 2.5E-29 | 1.0E-31 | 76142     | protein phosphatase 1, regulatory (inhibitor) subunit 14c                                                 |
| Ppp1r1a   | 3.20  | 1.68  | 8.7E-13 | 1.8E-14 | 58200     | protein phosphatase 1, regulatory (inhibitor) subunit 1A                                                  |
| Ppp1r27   | 3.88  | 1.95  | 2.4E-13 | 4.6E-15 | 68701     | protein phosphatase 1, regulatory subunit 27                                                              |
| Ppp1r3a   | 4.37  | 2.13  | 2.1E-21 | 1.7E-23 | 140491    | protein phosphatase 1, regulatory (inhibitor) subunit 3A                                                  |
| Ppp1r3c   | 2.13  | 1.09  | 3.3E-12 | 7.1E-14 | 53412     | protein phosphatase 1, regulatory (inhibitor) subunit 3C                                                  |
| Ppp1r3d   | 1.98  | 0.99  | 2.2E-06 | 1.1E-07 | 228966    | protein phosphatase 1, regulatory subunit 3D                                                              |
| Ppp2r3a   | 2.53  | 1.34  | 2.2E-14 | 3.5E-16 | 235542    | protein phosphatase 2, regulatory subunit B', alpha                                                       |
| Pprc1     | 0.65  | -0.61 | 8.9E-06 | 4.9E-07 | 226169    | peroxisome proliferative activated receptor, gamma, coactivator-related 1                                 |
| Pptic7    | 1.55  | 0.64  | 6.7E-05 | 4.6E-06 | 320717    | PTC7 protein phosphatase homolog                                                                          |
| Prdm11    | 0.53  | -0.91 | 2.5E-03 | 2.7E-04 | 100042784 | PR domain containing 11                                                                                   |
| Prdx3     | 1.62  | 0.69  | 1.1E-06 | 4.9E-08 | 11757     | peroxiredoxin 3                                                                                           |
| Prcid2    | 1.80  | 0.85  | 7.9E-04 | 7.2E-05 | 77619     | PREL1 domain containing 2                                                                                 |
| Presp1    | 2.86  | 1.51  | 1.2E-15 | 1.7E-17 | 213760    | prolyl endopeptidase-like                                                                                 |
| Prkaa2    | 3.20  | 1.68  | 3.0E-17 | 3.6E-19 | 108079    | protein kinase, AMP-activated, alpha 2 catalytic subunit                                                  |
| Prkab2    | 2.00  | 1.00  | 3.1E-12 | 6.7E-14 | 108097    | protein kinase, AMP-activated, beta 2 non-catalytic subunit                                               |
| Prkaca    | 2.58  | 1.37  | 9.7E-17 | 1.2E-18 | 18747     | protein kinase, cAMP dependent, catalytic, alpha                                                          |
| Prkag3    | 1.88  | 0.91  | 1.9E-06 | 8.9E-08 | 241113    | protein kinase, AMP-activated, gamma 3 non-catalytic subunit                                              |
| Prkqc     | 2.44  | 1.29  | 8.9E-11 | 2.2E-12 | 18761     | protein kinase C, theta                                                                                   |
| Prpb1     | 1.89  | 0.92  | 3.8E-08 | 1.4E-09 | 381148    | proline rich basic protein 1                                                                              |
| Procr     | 1.74  | 0.80  | 5.8E-04 | 5.1E-05 | 19124     | protein C receptor, endothelial                                                                           |
| Prr16     | 0.55  | -0.86 | 2.3E-03 | 2.4E-04 | 71373     | proline rich 16                                                                                           |
| Prr32     | 2.54  | 1.34  | 3.0E-12 | 6.5E-14 | 68800     | proline rich 32                                                                                           |
| Prr33     | 3.36  | 1.75  | 1.3E-21 | 1.1E-23 | 677289    | proline rich 33                                                                                           |
| Prrg4     | 0.36  | -1.47 | 1.9E-03 | 2.0E-04 | 228413    | proline rich Gla (G-carboxyglutamic acid) 4 (transmembrane)                                               |
| Prrx2     | 0.50  | -1.01 | 5.2E-05 | 3.5E-06 | 20204     | paired related homeobox 2                                                                                 |
| Prupe     | 1.96  | 0.97  | 1.2E-10 | 3.0E-12 | 229589    | prune homolog                                                                                             |
| Psea      | 0.05  | -4.43 | 2.8E-17 | 3.4E-19 | 72373     | prostate stem cell antigen                                                                                |
| Pstpip2   | 2.62  | 1.39  | 5.9E-16 | 8.0E-18 | 19201     | proline-serine-threonine phosphatase-interacting protein 2                                                |
| Ptgs2     | 2.20  | 1.20  | 1.9E-08 | 6.4E-10 | 96979     | prostaglandin E synthase 2                                                                                |
| Ptgs3l    | 2.48  | 1.31  | 2.3E-16 | 2.9E-18 | 73635     | prostaglandin E synthase 3 (cytosolic)-like                                                               |
| Ptgr2     | 2.36  | 1.24  | 2.4E-15 | 3.6E-17 | 77219     | prostaglandin reductase 2                                                                                 |
| Ptma      | 0.64  | -0.64 | 4.3E-04 | 3.6E-05 | 19231     | prothymosin alpha                                                                                         |
| Ptp4a3    | 2.11  | 1.08  | 1.3E-14 | 2.0E-16 | 19245     | protein tyrosine phosphatase 4a3                                                                          |
| Ptpa      | 3.11  | 1.64  | 1.2E-22 | 8.7E-25 | 30963     | protein tyrosine phosphatase-like (proline instead of catalytic arginine), member a                       |
| Ptpfb     | 0.59  | -0.75 | 3.3E-03 | 3.8E-04 | 70757     | protein tyrosine phosphatase-like (proline instead of catalytic arginine), member b                       |
| Ptpn13    | 0.52  | -0.93 | 4.2E-06 | 2.2E-07 | 19249     | protein tyrosine phosphatase, non-receptor type 13                                                        |
| Ptpn7     | 0.57  | -0.81 | 5.4E-03 | 6.9E-04 | 320139    | protein tyrosine phosphatase, non-receptor type 7                                                         |
| Ptprb     | 2.17  | 1.12  | 1.1E-13 | 1.9E-15 | 19263     | protein tyrosine phosphatase, receptor type, B                                                            |
| Ptprf     | 0.42  | -1.27 | 2.8E-07 | 1.2E-08 | 19268     | protein tyrosine phosphatase, receptor type, F                                                            |
| Ptprt     | 0.31  | -1.67 | 3.0E-05 | 1.9E-06 | 19281     | protein tyrosine phosphatase, receptor type, T                                                            |
| Ptpru     | 0.44  | -1.19 | 1.8E-05 | 1.0E-06 | 19273     | protein tyrosine phosphatase, receptor type, U                                                            |
| Ptc3      | 0.65  | -0.63 | 4.3E-03 | 5.2E-04 | 19288     | pentraxin related gene                                                                                    |
| Pvalb     | 4.15  | 5.36  | 3.4E-37 | 5.5E-40 | 19293     | parvalbumin                                                                                               |
| Pvr       | 1.80  | 0.89  | 6.8E-07 | 3.0E-08 | 52118     | poliovirus receptor                                                                                       |
| Pvrl1     | 0.55  | -0.86 | 3.0E-06 | 1.5E-07 | 58235     | poliovirus receptor-related 1                                                                             |
| Pygm      | 6.01  | 2.59  | 7.0E-39 | 1.1E-41 | 19309     | muscle glycogen phosphorylase                                                                             |
| Qdpr      | 1.63  | 0.70  | 1.4E-06 | 6.6E-08 | 110391    | quinoid dihydropteridine reductase                                                                        |
| Qpet      | 2.35  | 1.23  | 5.8E-11 | 1.4E-12 | 70536     | glutaminyl-peptide cyclotransferase (glutaminylicyclase)                                                  |
| Rab11fip4 | 0.50  | -1.01 | 1.1E-03 | 1.1E-04 | 268451    | RAB11 family interacting protein 4 (class II)                                                             |
| Rab38     | 0.39  | -1.37 | 2.6E-03 | 2.9E-04 | 72433     | RAB38, member of RAS oncogene family                                                                      |
| Rab3a     | 2.40  | 1.26  | 9.1E-11 | 2.3E-12 | 19339     | RAB3A, member RAS oncogene family                                                                         |
| Rab3d     | 0.55  | -0.87 | 6.7E-04 | 6.0E-05 | 19340     | RAB3D, member RAS oncogene family                                                                         |
| Rab3ip    | 1.59  | 0.67  | 1.8E-04 | 1.4E-05 | 216363    | RAB3A interacting protein                                                                                 |
| Rab40b    | 2.66  | 1.41  | 1.9E-16 | 2.4E-18 | 217371    | Rab40b, member RAS oncogene family                                                                        |
| Rab42a    | 1.53  | 0.61  | 5.5E-04 | 4.8E-05 | 70314     | rabapflin, RAB GTPase binding effector protein 2                                                          |
| Rac3      | 0.46  | -1.13 | 3.3E-05 | 2.0E-06 | 170758    | RAS-related C3 botulinum substrate 3                                                                      |
| Rad23a    | 1.52  | 0.60  | 2.7E-05 | 1.7E-06 | 19358     | RAD23a homolog                                                                                            |
| Rai2      | 2.25  | 1.17  | 1.1E-09 | 3.1E-11 | 24004     | retinoic acid induced 2                                                                                   |
| Ramp1     | 3.67  | 1.88  | 2.7E-16 | 3.5E-18 | 51801     | receptor (calcitonin) activity modifying protein 1                                                        |
| Rapgef1   | 0.44  | -1.19 | 5.2E-04 | 4.5E-05 | 268480    | Rap guanine nucleotide exchange factor (GEF)-like 1                                                       |
| Rarg      | 0.59  | -0.77 | 7.2E-06 | 3.9E-07 | 19411     | retinoic acid receptor, gamma                                                                             |
| Rarres2   | 2.09  | 1.07  | 7.3E-08 | 2.8E-09 | 71660     | retinoic acid receptor responder (tazarotene induced) 2                                                   |
| Rasgrp2   | 1.75  | 0.81  | 8.3E-05 | 5.8E-06 | 19395     | RAS, guanyl releasing protein 2                                                                           |
| Rassf3    | 1.59  | 0.67  | 1.1E-04 | 8.0E-06 | 192678    | Ras association (RalGDS/AF-6) domain family member 3                                                      |
| Rassf4    | 1.98  | 0.99  | 1.2E-10 | 3.0E-12 | 213391    | Ras association (RalGDS/AF-6) domain family member 4                                                      |
| Rbfox1    | 3.14  | 1.65  | 3.5E-19 | 3.5E-21 | 268859    | RNA binding protein, fox-1 homolog 1                                                                      |
| Rbm14     | 0.66  | -0.61 | 2.1E-05 | 1.3E-06 | 56275     | RNA binding motif protein 14                                                                              |
| Rbm15b    | 0.65  | -0.61 | 3.4E-05 | 2.1E-06 | 109095    | RNA binding motif protein 15B                                                                             |
| Rbm24     | 1.94  | 0.95  | 1.3E-07 | 5.1E-09 | 666794    | RNA binding motif protein 24                                                                              |
| Rbm38     | 2.54  | 1.34  | 1.1E-15 | 1.5E-17 | 56190     | RNA binding motif protein 38                                                                              |
| Rbmnl1    | 0.64  | -0.64 | 2.1E-04 | 1.6E-05 | 19656     | RNA binding motif protein, X linked-like-1                                                                |
| Rcan2     | 1.81  | 0.86  | 2.9E-04 | 2.3E-05 | 53901     | regulator of calcineurin 2                                                                                |
| Rcc2      | 0.59  | -0.77 | 8.8E-06 | 4.8E-07 | 108911    | regulator of chromosome condensation 2                                                                    |
| Rcsd1     | 2.95  | 1.56  | 1.9E-24 | 1.3E-26 | 226594    | RCSD domain containing 1                                                                                  |
| Rdh14     | 1.68  | 0.75  | 5.6E-05 | 3.8E-06 | 105014    | retinol dehydrogenase 14 (all-trans and 9-cis)                                                            |
| Recq14    | 0.59  | -0.77 | 1.7E-03 | 1.7E-04 | 79456     | RecQ protein-like 4                                                                                       |
| Reep1     | 1.95  | 0.96  | 4.7E-08 | 1.7E-09 | 52250     | receptor accessory protein 1                                                                              |
| Reep4     | 0.59  | -0.76 | 9.9E-04 | 9.4E-05 | 72549     | receptor accessory protein 4                                                                              |
| Retnlg    | 25.28 | 4.66  | 1.1E-18 | 1.1E-20 | 245195    | resistin like gamma                                                                                       |
| Retstat   | 2.07  | 1.05  | 1.3E-08 | 4.1E-10 | 67442     | retinol saturase (all trans retinol 13,14 reductase)                                                      |
| Rfng      | 0.60  | -0.74 | 4.7E-05 | 3.1E-06 | 19719     | RFNG O-fucosylpeptide 3-beta-N-acetylglucosaminyltransferase                                              |
| Rgef      | 1.62  | 0.70  | 3.1E-03 | 3.6E-04 | 66214     | regulator of cell cycle                                                                                   |
| Rgs4      | 1.69  | 0.76  | 6.3E-03 | 8.2E-04 | 19736     | regulator of G-protein signaling 4                                                                        |
| Rgs5      | 1.59  | 0.67  | 1.4E-05 | 9.5E-07 | 19737     | regulator of G-protein signaling 5                                                                        |
| Rhbdl1    | 1.90  | 0.93  | 8.0E-05 | 5.6E-06 | 214951    | rhomboid 1, ventral-like 1                                                                                |
| Rhod      | 0.62  | -0.69 | 3.4E-03 | 3.9E-04 | 11854     | ras homolog gene family, member D                                                                         |
| Rhof      | 0.54  | -0.88 | 2.4E-03 | 2.6E-04 | 23912     | ras homolog gene family, member f                                                                         |
| Rhpn1     | 0.40  | -1.33 | 3.9E-03 | 4.6E-04 | 14787     | rhophilin, Rho GTPase binding protein 1                                                                   |
| Rian      | 1.87  | 0.90  | 2.5E-10 | 6.6E-12 | 75745     | RNA imprinted and accumulated in nucleus                                                                  |
| Rilp      | 7.93  | 2.99  | 1.4E-19 | 1.3E-21 | 280408    | Rab interacting lysosomal protein                                                                         |
| Rilpl1    | 1.85  | 0.89  | 1.7E-10 | 4.4E-12 | 75695     | Rab interacting lysosomal protein-like 1                                                                  |
| Rimkb     | 0.21  | -2.24 | 7.9E-10 | 2.2E-11 | 108653    | ribosomal modification protein rimK-like family member B                                                  |

|           |       |        |         |         |           |                                                                                                                  |
|-----------|-------|--------|---------|---------|-----------|------------------------------------------------------------------------------------------------------------------|
| Ripply3   | 2.18  | 1.12   | 1.9E-05 | 1.1E-06 | 170765    | rippl3 homolog (zebrafish)                                                                                       |
| Rmnd1     | 1.83  | 0.87   | 1.0E-04 | 7.3E-06 | 66302     | regulator of microtubule dynamics 1                                                                              |
| Rnf123    | 1.64  | 0.72   | 1.9E-08 | 6.5E-10 | 84585     | ring finger protein 123                                                                                          |
| Rnf128    | 2.75  | 1.46   | 4.8E-11 | 1.2E-12 | 66889     | ring finger protein 128                                                                                          |
| Rnf217    | 1.61  | 0.69   | 4.6E-05 | 3.0E-06 | 268291    | ring finger protein 217                                                                                          |
| Rnf26     | 0.64  | -0.64  | 4.3E-05 | 2.8E-06 | 213211    | ring finger protein 26                                                                                           |
| Rnf43     | 0.25  | -1.98  | 2.8E-04 | 2.2E-05 | 207742    | ring finger protein 43                                                                                           |
| Rock2     | 1.87  | -0.81  | 3.1E-07 | 1.3E-08 | 198720    | Rho-associated coiled-coil containing protein kinase 2                                                           |
| Rorc      | 2.22  | 1.15   | 3.6E-04 | 2.9E-05 | 19885     | RAR-related orphan receptor gamma                                                                                |
| Rph3al    | 2.65  | 1.40   | 9.8E-07 | 4.4E-08 | 380714    | rabphilin 3A-like (without C2 domains)                                                                           |
| Rpl10a    | 0.57  | -0.82  | 2.9E-03 | 3.2E-04 | 19896     | ribosomal protein L10A                                                                                           |
| Rpl3l     | 71.46 | 6.16   | 9.8E-41 | 1.4E-43 | 66211     | ribosomal protein L3-like                                                                                        |
| Rpn1      | 0.65  | -0.63  | 7.9E-06 | 4.3E-07 | 103963    | ribophorin 1                                                                                                     |
| Rps6ka3   | 1.60  | 0.68   | 4.4E-05 | 2.9E-06 | 110651    | ribosomal protein S6 kinase polypeptide 3                                                                        |
| Rrad      | 1.63  | 0.70   | 2.1E-03 | 2.2E-04 | 56437     | Ras-related associated with diabetes                                                                             |
| Rragd     | 2.05  | 1.03   | 4.3E-08 | 1.5E-09 | 52187     | Ras-related GTP binding D                                                                                        |
| Rras      | 2.51  | 1.33   | 9.8E-23 | 7.2E-25 | 20130     | Harvey rat sarcoma oncogene, subgroup R                                                                          |
| Rsph3b    | 1.72  | 0.78   | 6.7E-03 | 8.8E-04 | 100037282 | radial spoke 3B homolog                                                                                          |
| Rsu1      | 1.56  | 0.64   | 5.1E-06 | 2.7E-07 | 20163     | Ras suppressor protein 1                                                                                         |
| Rtkn2     | 1.78  | 0.83   | 5.1E-04 | 4.4E-05 | 170799    | rotekin 2                                                                                                        |
| Rtl1      | 2.83  | 1.50   | 3.7E-19 | 3.7E-21 | 353326    | retrotransposon-like 1                                                                                           |
| Rtn2      | 2.99  | 1.58   | 1.1E-20 | 1.0E-22 | 20167     | reticulon 2 (Z-band associated protein)                                                                          |
| Rtn4      | 1.78  | 0.83   | 3.3E-07 | 1.4E-08 | 68585     | reticulon 4                                                                                                      |
| Rtn4ip1   | 1.70  | 0.77   | 5.7E-04 | 5.0E-05 | 170728    | reticulon 4 interacting protein 1                                                                                |
| Rtn4r     | 0.45  | -1.16  | 8.7E-05 | 6.1E-06 | 65079     | reticulon 4 receptor                                                                                             |
| Rtp4      | 2.39  | 1.26   | 4.0E-04 | 3.3E-05 | 67775     | receptor transporter protein 4                                                                                   |
| Runx2     | 0.64  | -0.64  | 3.1E-03 | 3.5E-04 | 12393     | runt related transcription factor 2                                                                              |
| Runx3     | 0.46  | -1.11  | 1.2E-05 | 6.8E-07 | 12399     | runt related transcription factor 3                                                                              |
| Rusc2     | 1.98  | 0.99   | 1.1E-09 | 3.0E-11 | 100213    | RUN and SH3 domain containing 2                                                                                  |
| Rxrg      | 1.74  | 0.80   | 2.0E-05 | 1.2E-06 | 20183     | retinoid X receptor gamma                                                                                        |
| Rybp      | 0.64  | -0.64  | 1.3E-03 | 1.3E-04 | 56353     | RING1 and YY1 binding protein                                                                                    |
| Ryr1      | 2.39  | 1.26   | 2.6E-13 | 5.0E-15 | 20190     | ryanodine receptor 1, skeletal muscle                                                                            |
| Ryr3      | 2.69  | 1.43   | 8.7E-14 | 1.5E-15 | 20192     | ryanodine receptor 3                                                                                             |
| S100a8    | 6.91  | 2.79   | 5.1E-12 | 1.1E-13 | 20201     | S100 calcium binding protein A8 (calgranulin A)                                                                  |
| S100a9    | 6.40  | 2.68   | 3.2E-14 | 5.4E-16 | 20202     | S100 calcium binding protein A9 (calgranulin B)                                                                  |
| Sacs      | 2.48  | 1.31   | 1.2E-05 | 6.7E-07 | 50720     | sacsin                                                                                                           |
| Samd10    | 0.52  | -0.93  | 6.4E-03 | 8.4E-04 | 229011    | sterile alpha motif domain containing 10                                                                         |
| Samd5     | 0.50  | -0.99  | 5.6E-04 | 4.8E-05 | 320825    | sterile alpha motif domain containing 5                                                                          |
| Samd9l    | 1.98  | 0.99   | 1.2E-05 | 6.8E-07 | 209086    | sterile alpha motif domain containing 9-like                                                                     |
| Samm50    | 1.63  | 0.71   | 1.1E-07 | 4.1E-09 | 68653     | sorting and assembly machinery component 50 homolog                                                              |
| Scarb2    | 1.50  | 0.59   | 8.0E-06 | 4.3E-07 | 12492     | scavenger receptor class B, member 2                                                                             |
| Scepdh    | 2.52  | 1.33   | 8.4E-18 | 9.6E-20 | 109232    | saccharopine dehydrogenase (putative)                                                                            |
| Scfd2     | 2.25  | 1.17   | 5.6E-12 | 1.2E-13 | 212986    | Sec1 family domain containing 2                                                                                  |
| Schip1    | 2.72  | 1.44   | 2.5E-14 | 4.1E-16 | 30953     | schwannomin interacting protein 1                                                                                |
| Scn1b     | 1.98  | 0.99   | 3.0E-05 | 1.8E-06 | 20266     | sodium channel, voltage-gated, type I, beta                                                                      |
| Scn3a     | 2.57  | 1.36   | 1.3E-06 | 5.7E-08 | 20269     | sodium channel, voltage-gated, type III, alpha                                                                   |
| Scn3b     | 1.56  | 0.64   | 2.4E-03 | 2.6E-04 | 235281    | sodium channel, voltage-gated, type III, beta                                                                    |
| Scn4a     | 3.21  | 1.68   | 8.4E-25 | 5.5E-27 | 110880    | sodium channel, voltage-gated, type IV, alpha                                                                    |
| Scn4b     | 7.29  | 2.87   | 3.1E-33 | 8.4E-36 | 399548    | sodium channel, type IV, beta                                                                                    |
| Scn5a     | 2.36  | 1.24   | 3.9E-08 | 1.4E-09 | 20271     | sodium channel, voltage-gated, type V, alpha                                                                     |
| Scn7a     | 3.79  | 1.92   | 2.1E-06 | 9.9E-08 | 20272     | sodium channel, voltage-gated, type VII, alpha                                                                   |
| Scn1a     | 0.25  | -2.02  | 4.9E-05 | 3.2E-06 | 20276     | sodium channel, nonvoltage-gated 1 alpha                                                                         |
| Scube1    | 0.43  | -1.21  | 2.2E-09 | 6.6E-11 | 64706     | signal peptide, CUB domain, EGF-like 1                                                                           |
| Scube3    | 0.45  | -1.14  | 7.9E-06 | 4.3E-07 | 268935    | signal peptide, CUB domain, EGF-like 3                                                                           |
| Sdc1      | 0.50  | -0.99  | 2.3E-10 | 6.2E-12 | 20969     | syndecan 1                                                                                                       |
| Sdf2l1    | 0.43  | -1.21  | 1.1E-07 | 4.4E-09 | 64136     | stromal cell-derived factor 2-like 1                                                                             |
| Sdha      | 2.08  | 1.05   | 2.5E-13 | 4.6E-15 | 66945     | succinate dehydrogenase complex, subunit A, flavoprotein (Fp)                                                    |
| Sdhb      | 2.03  | 1.02   | 1.2E-10 | 3.2E-12 | 67680     | succinate dehydrogenase complex, subunit B, iron sulfur (Ip)                                                     |
| Sdhe      | 1.73  | 0.79   | 4.4E-09 | 1.4E-10 | 66052     | succinate dehydrogenase complex, subunit C, integral membrane protein                                            |
| Sdhd      | 2.08  | 1.06   | 1.1E-13 | 2.0E-15 | 66925     | succinate dehydrogenase complex, subunit D, integral membrane protein                                            |
| Sec14f5   | 3.15  | 1.66   | 1.3E-08 | 4.4E-10 | 665119    | SEC14-like 5                                                                                                     |
| Sec31b    | 2.40  | 1.26   | 3.6E-05 | 2.3E-06 | 240667    | Sec31 homolog B                                                                                                  |
| Sec61a    | 0.66  | -0.60  | 1.7E-05 | 1.0E-06 | 53421     | Sec61 alpha 1 subunit                                                                                            |
| Sec13     | 2.98  | 1.58   | 1.5E-20 | 1.3E-22 | 232328    | se1 suppressor of lin-12-like 3                                                                                  |
| Sema3f    | 0.47  | -1.10  | 2.8E-10 | 7.6E-12 | 20350     | sema domain, immunoglobulin domain (Ig), short basic domain, secreted, (semaphorin) 3F                           |
| Sema4a    | 0.40  | -1.32  | 2.7E-03 | 2.0E-04 | 20351     | sema domain, immunoglobulin domain (Ig), transmembrane domain (TM) and short cytoplasmic domain, (semaphorin) 4A |
| Sema4g    | 0.54  | -0.88  | 8.0E-04 | 7.3E-05 | 26456     | sema domain, immunoglobulin domain (Ig), transmembrane domain (TM) and short cytoplasmic domain, (semaphorin) 4G |
| Sept3     | 0.47  | -1.09  | 3.4E-05 | 2.1E-06 | 24050     | septin 3                                                                                                         |
| Sept4     | 1.62  | 0.69   | 3.3E-05 | 2.0E-06 | 18952     | septin 4                                                                                                         |
| Sept5     | 0.49  | -1.04  | 9.7E-09 | 3.1E-10 | 18951     | septin 5                                                                                                         |
| Serpina3j | 0.00  | -10.63 | 7.7E-35 | 1.6E-37 | 238395    | serine (or cysteine) peptidase inhibitor, clade A (alpha-1 antiprotease, antitrypsin), member 3J                 |
| Serpinb11 | 0.04  | -4.81  | 4.1E-15 | 6.2E-17 | 66957     | serine (or cysteine) peptidase inhibitor, clade B (ovalbumin), member 11                                         |
| Serpinb1a | 1.71  | 0.78   | 3.6E-05 | 2.3E-06 | 66222     | serine (or cysteine) peptidase inhibitor, clade B, member 1a                                                     |
| Serpinb1  | 1.61  | 0.69   | 1.4E-05 | 8.3E-07 | 12258     | serine (or cysteine) peptidase inhibitor, clade G, member 1                                                      |
| Sesn2     | 0.56  | -0.83  | 6.0E-03 | 7.7E-04 | 230784    | sestrin 2                                                                                                        |
| Sez6l     | 0.47  | -1.10  | 3.7E-03 | 4.3E-04 | 56747     | seizure related 6 homolog like                                                                                   |
| Sf3b4     | 0.66  | -0.60  | 4.2E-03 | 5.0E-04 | 107701    | splicing factor 3b, subunit 4                                                                                    |
| Sfrp2     | 0.49  | -1.04  | 1.6E-09 | 4.6E-11 | 20319     | secreted frizzled-related protein 2                                                                              |
| Sfca      | 2.87  | 1.52   | 7.1E-21 | 6.2E-25 | 20391     | sarcoglycan, alpha (dystrophin-associated glycoprotein)                                                          |
| Sfcb      | 1.70  | 0.77   | 3.2E-06 | 1.6E-07 | 24051     | sarcoglycan, beta (dystrophin-associated glycoprotein)                                                           |
| Sfcd      | 1.68  | 0.75   | 2.3E-03 | 2.4E-04 | 24052     | sarcoglycan, delta (dystrophin-associated glycoprotein)                                                          |
| Sfcd      | 2.65  | 1.41   | 2.6E-14 | 4.2E-16 | 24053     | sarcoglycan, gamma (dystrophin-associated glycoprotein)                                                          |
| Sgms1     | 1.51  | 0.60   | 1.1E-05 | 6.2E-07 | 208449    | sphingomyelin synthase 1                                                                                         |
| Sgsm1     | 0.57  | -0.80  | 3.7E-03 | 4.4E-04 | 52850     | small G protein signaling modulator 1                                                                            |
| Sh3bgr    | 4.37  | 2.13   | 4.7E-30 | 1.8E-32 | 50795     | SH3-binding domain glutamic acid-rich protein                                                                    |
| Sh3bgrl2  | 0.44  | -1.18  | 2.9E-04 | 2.3E-05 | 212531    | SH3 domain binding glutamic acid-rich protein like 2                                                             |
| Sh3bp1    | 0.61  | -0.71  | 1.1E-04 | 7.8E-06 | 20401     | SH3-domain binding protein 1                                                                                     |
| Sh3bp5    | 1.62  | 0.69   | 2.5E-08 | 8.6E-10 | 24056     | SH3-domain binding protein 5 (BTK-associated)                                                                    |
| Sh3gl2    | 0.33  | -1.60  | 2.4E-07 | 9.7E-09 | 20404     | SH3-domain GRB2-like 2                                                                                           |
| Sh3y1l    | 0.56  | -0.84  | 2.7E-03 | 3.0E-04 | 24057     | Sh3 domain YSC-like 1                                                                                            |
| Shank1    | 0.62  | -0.68  | 2.7E-03 | 3.0E-04 | 243961    | SH3/ankyrin domain gene 1                                                                                        |
| Shisa2    | 1.52  | 0.64   | 2.0E-04 | 1.5E-05 | 219134    | shisa homolog 2                                                                                                  |
| Shisa4    | 2.57  | 1.36   | 3.5E-14 | 5.9E-16 | 77552     | shisa homolog 4                                                                                                  |
| Shisa6    | 0.56  | -0.83  | 5.2E-03 | 6.5E-04 | 380702    | shisa homolog 6                                                                                                  |
| Shisa7    | 0.12  | -3.04  | 1.3E-08 | 4.1E-10 | 232813    | shisa homolog 7                                                                                                  |
| Shkbp1    | 0.60  | -0.75  | 1.3E-03 | 1.3E-04 | 192192    | Shk3bp1 binding protein 1                                                                                        |
| Shox2     | 0.60  | -0.73  | 3.0E-03 | 3.4E-04 | 20429     | short stature homeobox 2                                                                                         |
| Shroom1   | 0.51  | -0.96  | 5.2E-03 | 6.6E-04 | 71774     | shroom family member 1                                                                                           |
| Siglec1   | 3.15  | 1.65   | 1.1E-13 | 2.0E-15 | 20612     | sialic acid binding Ig-like lectin 1, sialoadhesin                                                               |
| Sim1      | 2.21  | 1.15   | 7.0E-04 | 6.3E-05 | 20464     | single-minded homolog 1                                                                                          |
| Sirt3     | 1.93  | 0.95   | 2.8E-06 | 1.4E-07 | 64384     | sirtuin 3 (silent mating type information regulation 2, homolog 3)                                               |
| Skp2      | 0.65  | -0.63  | 5.1E-05 | 3.4E-06 | 27401     | S-phase kinase-associated protein 2 (p45)                                                                        |
| Slain1    | 0.41  | -1.28  | 4.2E-04 | 3.4E-05 | 105439    | SLAIN motif family, member 1                                                                                     |
| Slain2    | 1.58  | 0.66   | 3.7E-06 | 1.8E-07 | 75991     | SLAIN motif family, member 2                                                                                     |
| Slc14a1   | 0.53  | -0.92  | 5.0E-04 | 4.3E-05 | 108052    | solute carrier family 14 (urea transporter), member 1                                                            |
| Slc16a10  | 1.57  | 0.65   | 7.8E-04 | 7.2E-05 | 72472     | solute carrier family 16 (monocarboxylic acid transporters), member 10                                           |
| Slc16a12  | 1.80  | 0.85   | 1.6E-03 | 1.6E-04 | 240638    | solute carrier family 16 (monocarboxylic acid transporters), member 12                                           |
| Slc16a13  | 0.52  | -0.94  | 1.7E-03 | 1.7E-04 | 69309     | solute carrier family 16 (monocarboxylic acid transporters), member 13                                           |
| Slc16a3   | 0.54  | -1.60  | 1.4E-30 | 4.9E-33 | 80879     | solute carrier family 16 (monocarboxylic acid transporters), member 3                                            |
| Slc18a1   | 3.16  | 1.66   | 1.4E-07 | 5.4E-09 | 110877    | solute carrier family 18 (vesicular monoamine), member 1                                                         |
| Slc1a2    | 0.47  | -1.10  | 2.3E-05 | 1.4E-06 | 20511     | solute carrier family 1 (glial high affinity glutamate transporter), member 2                                    |
| Slc20a2   | 1.61  | 0.69   | 1.1E-06 | 5.0E-08 | 20516     | solute carrier family 20, member 2                                                                               |
| Slc22a23  | 0.59  | -0.75  | 6.0E-03 | 7.7E-04 | 73102     | solute carrier family 22, member 23                                                                              |
| Slc22a3   | 0.39  | -1.37  | 1.2E-06 | 5.4E-08 | 20519     | solute carrier family 22 (organic cation transporter), member 3                                                  |
| Slc25a1   | 0.66  | -0.59  | 4.1E-03 | 5.0E-04 | 13358     | solute carrier family 25 (mitochondrial carrier, citrate transporter), member 1                                  |
| Slc25a11  | 1.92  | 0.94   | 2.4E-12 | 5.2E-14 | 67863     | solute carrier family 25 (mitochondrial carrier oxoglutarate carrier), member 11                                 |
| Slc25a12  | 3.37  | 1.75   | 5.4E-32 | 1.7E-34 | 78830     | solute carrier family 25 (mitochondrial carrier, Aralar), member 12                                              |
| Slc25a20  | 2.31  | 1.21   | 1.1E-13 | 2.0E-15 | 57279     | solute carrier family 25 (mitochondrial carnitine/acylcarnitine translocase), member 20                          |
| Slc25a3   | 1.57  | 0.65   | 6.2E-06 | 3.3E-07 | 18674     | solute carrier family 25 (mitochondrial carrier, phosphate carrier), member 3                                    |
| Slc25a34  | 10.90 | 3.45   | 4.6E-36 | 7.5E-39 | 384071    | solute carrier family 25, member 34                                                                              |
| Slc25a37  | 0.52  | -0.96  | 7.8E-09 | 2.5E-10 | 67712     | solute carrier family 25, member 37                                                                              |
| Slc25a4   | 2.99  | 1.58   | 4.7E-28 | 2.2E-30 | 11739     | solute carrier family 25 (mitochondrial carrier, adenine nucleotide translocator), member 4                      |
| Slc26a2   | 0.48  | -1.07  | 1.1E-05 | 5.9E-07 | 13521     | solute carrier family 26 (sulfate transporter), member 2                                                         |
| Slc26a7   | 0.39  | -1.35  | 1.9E-05 | 1.1E-06 | 208800    | solute carrier family 26, member 7                                                                               |
| Slc27a3   | 0.59  | -0.75  | 1.9E-04 | 1.4E-05 | 26568     | solute carrier family 27 (fatty acid transporter), member 3                                                      |
| Slc29a2   | 1.56  | 0.64   | 4.8E-03 | 5.9E-04 | 13340     | solute carrier family 29 (nucleoside transporters), member 2                                                     |
| Slc2a1    | 0.60  | -0.74  | 1.8E-04 | 1.3E-05 | 20525     | solute carrier family 2 (facilitated glucose transporter), member 1                                              |
| Slc2a12   | 1.88  | 0.91   | 7.5E-05 | 5.2E-06 | 353169    | solute carrier family 2 (facilitated glucose transporter), member 12                                             |
| Slc2a3    | 0.15  | -2.73  | 7.7E-69 | 2.0E-72 | 20527     | solute carrier family 2 (facilitated glucose transporter), member 3                                              |
| Slc2a4    | 3.66  | 1.87   | 1.0E-40 | 1.4E-43 | 20528     | solute carrier family 2 (facilitated glucose transporter), member 4                                              |
| Slc30a10  | 3.17  | 1.67   | 4.7E-08 | 1.7E-09 | 226781    | solute carrier family 30, member 10                                                                              |



|            |       |       |         |          |        |                                                                                                               |
|------------|-------|-------|---------|----------|--------|---------------------------------------------------------------------------------------------------------------|
| Slc30a2    | 0.29  | -1.80 | 1.4E-11 | 3.1E-13  | 238010 | solute carrier family 30 (zinc transporter), member 2                                                         |
| Slc35e4    | 2.14  | 1.10  | 6.3E-06 | 3.3E-07  | 103710 | solute carrier family 35, member E4                                                                           |
| Slc36a2    | 2.81  | 1.49  | 2.0E-03 | 2.1E-04  | 246049 | solute carrier family 36 (proton/amino acid symporter), member 2                                              |
| Slc37a4    | 1.91  | 0.94  | 2.1E-07 | 8.4E-09  | 14385  | solute carrier family 37 (glucose-6-phosphate transporter), member 4                                          |
| Slc39a11   | 0.62  | -0.68 | 1.2E-03 | 1.2E-04  | 69806  | solute carrier family 39 (metal ion transporter), member 11                                                   |
| Slc3a1     | 2.73  | 1.45  | 6.8E-16 | 9.4E-18  | 20532  | solute carrier family 3, member 1                                                                             |
| Slc41a1    | 2.04  | 1.03  | 1.6E-14 | 2.5E-16  | 98396  | solute carrier family 41, member 1                                                                            |
| Slc41a2    | 0.49  | -1.03 | 4.8E-04 | 5.24E-04 | 41160  | solute carrier family 46, member 1                                                                            |
| Slc47a1    | 3.01  | 1.59  | 2.9E-10 | 7.7E-12  | 67473  | solute carrier family 47, member 1                                                                            |
| Slc52a3    | 0.41  | -1.30 | 3.6E-06 | 1.8E-07  | 69698  | solute carrier protein family 52, member 3                                                                    |
| Slc5a1     | 0.16  | -2.62 | 1.6E-03 | 1.6E-04  | 20537  | solute carrier family 5 (sodium/glucose cotransporter), member 1                                              |
| Slc6a13    | 2.61  | 1.39  | 1.5E-08 | 4.9E-10  | 14412  | solute carrier family 6 (neurotransmitter transporter, GABA), member 13                                       |
| Slc6a17    | 0.51  | -0.97 | 3.0E-05 | 1.9E-06  | 229706 | solute carrier family 6 (neurotransmitter transporter), member 17                                             |
| Slc7a11    | 0.18  | -2.47 | 3.3E-04 | 2.7E-05  | 26570  | solute carrier family 7 (cationic amino acid transporter, y+ system), member 11                               |
| Slc7a2     | 1.67  | 0.74  | 1.6E-07 | 6.5E-09  | 11988  | solute carrier family 7 (cationic amino acid transporter, y+ system), member 2                                |
| Slc7a6     | 0.66  | -0.60 | 1.2E-04 | 8.4E-06  | 330836 | solute carrier family 7 (cationic amino acid transporter, y+ system), member 6                                |
| Slc8a2     | 0.40  | -1.32 | 2.7E-08 | 9.4E-10  | 110891 | solute carrier family 8 (sodium/calcium exchanger), member 2                                                  |
| Slc9a2     | 5.56  | 2.48  | 1.2E-28 | 5.3E-31  | 226999 | solute carrier family 9 (sodium/hydrogen exchanger), member 2                                                 |
| Slco2b1    | 1.90  | 0.93  | 2.9E-07 | 1.2E-08  | 101488 | solute carrier organic anion transporter family, member 2b1                                                   |
| Slnf2      | 1.88  | 0.91  | 6.5E-04 | 5.8E-05  | 20556  | schlafen 2                                                                                                    |
| Slnf5      | 2.73  | 1.45  | 6.7E-12 | 1.5E-13  | 327978 | schlafen 5                                                                                                    |
| Slnf5os    | 1.83  | 0.87  | 3.5E-04 | 2.9E-05  | 76392  | schlafen 5, opposite strand                                                                                   |
| Slit1      | 2.17  | 1.12  | 9.4E-04 | 8.9E-05  | 20562  | slit homolog 1                                                                                                |
| Slit2      | 0.66  | -0.61 | 3.9E-03 | 4.6E-04  | 20563  | slit homolog 2                                                                                                |
| Smap       | 1.52  | 0.60  | 6.2E-05 | 4.2E-06  | 83997  | sarcolemma associated protein                                                                                 |
| Sln        | 5.00  | 2.32  | 4.0E-28 | 1.9E-30  | 66402  | sarcophilin                                                                                                   |
| Smapg      | 0.50  | -1.00 | 2.8E-03 | 3.1E-04  | 207818 | small cell adhesion glycoprotein                                                                              |
| Smared3    | 1.65  | 0.72  | 3.9E-06 | 2.0E-07  | 66993  | SWI/SNF related, matrix associated, actin dependent regulator of chromatin, subfamily d, member 3             |
| Smim19     | 1.70  | 0.76  | 3.1E-05 | 1.9E-06  | 102032 | small integral membrane protein 19                                                                            |
| Smim20     | 1.63  | 0.70  | 5.4E-05 | 3.6E-06  | 66278  | small integral membrane protein 20                                                                            |
| Smim5      | 1.66  | 0.73  | 1.9E-03 | 2.0E-04  | 66528  | small integral membrane protein 5                                                                             |
| Smoc1      | 1.59  | 0.67  | 3.2E-05 | 2.0E-06  | 64075  | SPARC related modular calcium binding 1                                                                       |
| Smpd13b    | 0.61  | -0.71 | 6.1E-03 | 8.0E-04  | 100340 | sphingomyelin phosphodiesterase, acid-like 3B                                                                 |
| Smpx       | 3.26  | 1.71  | 1.9E-18 | 2.1E-20  | 66106  | small muscle protein, X-linked                                                                                |
| Sms        | 1.79  | 0.84  | 2.2E-06 | 1.1E-07  | 20603  | spermine synthase                                                                                             |
| Smtm       | 1.52  | 0.60  | 1.2E-04 | 8.9E-06  | 29856  | smoothelin                                                                                                    |
| Smtm1      | 14.03 | 3.81  | 4.3E-24 | 3.0E-26  | 68678  | smoothelin-like 1                                                                                             |
| Smtm2      | 2.10  | 1.07  | 6.0E-12 | 1.3E-13  | 276829 | smoothelin-like 2                                                                                             |
| Smyd1      | 1.93  | 0.95  | 3.0E-07 | 1.2E-08  | 12180  | SET and MYND domain containing 1                                                                              |
| Sned1      | 0.55  | -0.87 | 1.5E-04 | 1.1E-05  | 208777 | sushi, nidogen and EGF-like domains 1                                                                         |
| Snta1      | 3.81  | 1.93  | 2.5E-26 | 1.4E-28  | 20648  | syntrophin, acidic 1                                                                                          |
| Sntb1      | 2.34  | 1.22  | 3.3E-12 | 7.3E-14  | 20649  | syntrophin, basic 1                                                                                           |
| Ssx11      | 0.58  | -0.79 | 1.7E-03 | 1.8E-04  | 74479  | sorting nexin 11                                                                                              |
| Ssx21      | 1.83  | 0.87  | 3.5E-08 | 1.2E-09  | 101113 | sorting nexin family member 21                                                                                |
| Sobp       | 1.50  | 0.59  | 2.5E-03 | 2.7E-04  | 109205 | sine oculis-binding protein homolog                                                                           |
| Socs2      | 1.92  | 0.94  | 3.5E-05 | 2.2E-06  | 216233 | suppressor of cytokine signaling 2                                                                            |
| Socs7      | 1.69  | 0.76  | 5.9E-06 | 3.1E-07  | 192157 | suppressor of cytokine signaling 7                                                                            |
| Sod2       | 2.27  | 1.19  | 9.8E-16 | 1.4E-17  | 20656  | superoxide dismutase 2, mitochondrial                                                                         |
| Sod3       | 3.72  | 1.89  | 1.1E-10 | 2.9E-12  | 20657  | superoxide dismutase 3, extracellular                                                                         |
| Sorbs1     | 2.01  | 1.00  | 3.6E-13 | 6.8E-15  | 20411  | sorbin and SH3 domain containing 1                                                                            |
| Sos2       | 1.67  | 0.74  | 9.4E-09 | 3.0E-10  | 20863  | son of sevenless homolog 2                                                                                    |
| Sax17      | 1.77  | 0.82  | 1.9E-04 | 1.4E-05  | 20671  | SRY-box containing gene 17                                                                                    |
| Sax6       | 1.66  | 0.73  | 3.9E-08 | 1.4E-09  | 20679  | SRY-box containing gene 6                                                                                     |
| Sax9       | 0.51  | -0.96 | 6.0E-04 | 5.3E-05  | 20682  | SRY-box containing gene 9                                                                                     |
| Sp6        | 0.15  | -2.70 | 1.5E-03 | 1.5E-04  | 83395  | trans-acting transcription factor 6                                                                           |
| Spag7      | 1.55  | 0.63  | 1.2E-06 | 5.4E-08  | 216873 | sperm associated antigen 7                                                                                    |
| Sparel1    | 1.97  | 0.98  | 3.7E-12 | 8.1E-14  | 13602  | SPARC-like 1                                                                                                  |
| Speg       | 2.45  | 1.29  | 1.2E-13 | 2.1E-15  | 11790  | SPEG complex locus                                                                                            |
| Spint2     | 0.34  | -1.57 | 1.3E-05 | 7.6E-07  | 20733  | serine protease inhibitor, Kunitz type 2                                                                      |
| Spop       | 1.68  | 0.75  | 5.7E-08 | 2.1E-09  | 20747  | speckle-type POZ protein                                                                                      |
| Spp1       | 1.97  | 0.98  | 3.5E-03 | 4.1E-04  | 20750  | secreted phosphoprotein 1                                                                                     |
| Sppr1a     | 0.05  | -4.38 | 1.2E-16 | 1.6E-18  | 20753  | small proline-rich protein 1A                                                                                 |
| Sppr3      | 0.00  | -7.65 | 9.1E-66 | 3.0E-69  | 20766  | small proline-rich protein 3                                                                                  |
| Sptb       | 3.52  | 1.82  | 1.5E-24 | 9.7E-27  | 20741  | spectrin beta, erythrocytic                                                                                   |
| Sptbn2     | 0.29  | -1.78 | 1.9E-03 | 2.0E-04  | 20743  | spectrin beta, non-erythrocytic 2                                                                             |
| Sple1      | 1.83  | 0.66  | 1.6E-03 | 1.6E-04  | 208566 | serine palmitoyltransferase, long chain base subunit 1                                                        |
| Sqle       | 0.51  | -0.96 | 8.4E-09 | 2.7E-10  | 20775  | squalene epoxidase                                                                                            |
| Sqrd1      | 1.62  | 0.70  | 7.3E-03 | 9.8E-04  | 59010  | sulfide: quinone reductase-like                                                                               |
| Src        | 0.66  | -0.61 | 1.2E-05 | 6.8E-07  | 20779  | Rous sarcoma oncogene                                                                                         |
| Srd5a1     | 0.51  | -0.98 | 1.5E-03 | 1.6E-04  | 78925  | steroid 5 alpha-reductase 1                                                                                   |
| Srf        | 1.57  | 0.65  | 8.7E-05 | 6.2E-06  | 20807  | serum response factor                                                                                         |
| Srl        | 2.92  | 1.55  | 8.7E-15 | 1.3E-16  | 106393 | sarcalumenin                                                                                                  |
| Srm        | 0.63  | -0.67 | 1.3E-06 | 5.8E-08  | 20810  | spermidine synthase                                                                                           |
| Srpk3      | 2.09  | 1.07  | 1.6E-08 | 5.4E-10  | 56504  | serine/arginine-rich protein specific kinase 3                                                                |
| Srpx2      | 1.88  | 0.91  | 7.4E-08 | 2.8E-09  | 68792  | sushi-repeat-containing protein, X-linked 2                                                                   |
| Srsf12     | 0.40  | -1.33 | 1.2E-05 | 6.8E-07  | 272009 | serine/arginine-rich splicing factor 12                                                                       |
| Ssb3       | 0.36  | -1.47 | 7.9E-06 | 4.3E-07  | 245857 | slingshot homolog 3                                                                                           |
| Sspn       | 2.65  | 1.41  | 6.3E-21 | 5.4E-23  | 16651  | sarcospan                                                                                                     |
| ST3gal6    | 1.66  | 0.73  | 3.1E-03 | 3.5E-04  | 54613  | ST3 beta-galactoside alpha-2,3-sialyltransferase 6                                                            |
| ST6galnac4 | 1.63  | 0.83  | 2.6E-08 | 9.0E-10  | 20448  | ST6 (alpha-N-acetyl-neuraminyl-2,3-beta-galactosyl-1,3)-N-acetylgalactosaminide alpha-2,6-sialyltransferase 4 |
| ST6galnac6 | 1.65  | 0.72  | 7.1E-08 | 2.7E-09  | 59935  | ST6 (alpha-N-acetyl-neuraminyl-2,3-beta-galactosyl-1,3)-N-acetylgalactosaminide alpha-2,6-sialyltransferase 6 |
| ST8sia2    | 0.57  | -0.81 | 1.1E-04 | 8.0E-06  | 20450  | ST8 alpha-N-acetyl-neuraminide alpha-2,8-sialyltransferase 2                                                  |
| ST8sia4    | 1.51  | 0.60  | 4.3E-03 | 5.3E-04  | 20452  | ST8 alpha-N-acetyl-neuraminide alpha-2,8-sialyltransferase 4                                                  |
| ST8sia5    | 3.43  | 1.78  | 6.0E-10 | 1.7E-11  | 225742 | ST8 alpha-N-acetyl-neuraminide alpha-2,8-sialyltransferase 5                                                  |
| Stac3      | 1.75  | 0.81  | 1.7E-06 | 8.1E-08  | 237611 | SH3 and cysteine rich domain 3                                                                                |
| Stard10    | 0.53  | -0.91 | 5.9E-03 | 7.6E-04  | 56018  | START domain containing 10                                                                                    |
| Stard5     | 0.55  | -0.87 | 4.3E-03 | 5.2E-04  | 170460 | STAR-related lipid transfer (START) domain containing 5                                                       |
| Stard7     | 1.67  | 0.74  | 6.3E-08 | 2.3E-09  | 99138  | START domain containing 7                                                                                     |
| Stat5a     | 1.54  | 0.62  | 9.1E-05 | 6.4E-06  | 20850  | signal transducer and activator of transcription 5A                                                           |
| Stat5b     | 1.57  | 0.65  | 2.0E-06 | 9.5E-08  | 20851  | signal transducer and activator of transcription 5B                                                           |
| Stau2      | 1.57  | 0.65  | 9.2E-04 | 8.6E-05  | 29819  | staufer (RNA binding protein) homolog 2                                                                       |
| Stbd1      | 4.46  | 2.16  | 1.7E-26 | 9.2E-29  | 52331  | starch binding domain 1                                                                                       |
| Steap3     | 1.72  | 0.79  | 1.6E-05 | 9.4E-07  | 68428  | STEAP family member 3                                                                                         |
| Steap4     | 1.86  | 0.90  | 1.4E-07 | 5.5E-09  | 117167 | STEAP family member 4                                                                                         |
| Stim1      | 2.59  | 1.37  | 7.8E-26 | 4.7E-28  | 20866  | stromal interaction molecule 1                                                                                |
| Stim2      | 1.78  | 0.83  | 2.5E-07 | 1.0E-08  | 116873 | stromal interaction molecule 2                                                                                |
| Stk17b     | 1.88  | 0.91  | 8.1E-07 | 3.6E-08  | 98267  | serine/threonine kinase 17b (apoptosis-inducing)                                                              |
| Stk32b     | 0.39  | -1.36 | 7.2E-03 | 9.7E-04  | 64293  | serine/threonine kinase 32B                                                                                   |
| Stmnd1     | 2.31  | 1.20  | 2.3E-04 | 1.8E-05  | 380842 | stathmin domain containing 1                                                                                  |
| Stom       | 2.23  | 1.16  | 2.7E-19 | 2.6E-21  | 13830  | stomatin                                                                                                      |
| Stra6      | 0.41  | -1.29 | 1.6E-05 | 9.0E-07  | 20897  | stimulated by retinoic acid gene 6                                                                            |
| Stradb     | 2.01  | 1.00  | 1.8E-09 | 5.2E-11  | 227154 | STE20-related kinase adaptor beta                                                                             |
| Strip2     | 3.41  | 1.77  | 5.7E-11 | 1.4E-12  | 320609 | striatin interacting protein 2                                                                                |
| Sucla2     | 2.33  | 1.22  | 2.8E-16 | 3.7E-18  | 20916  | succinate-Coenzyme A ligase, ADP-forming, beta subunit                                                        |
| Suclg1     | 1.98  | 0.99  | 2.6E-14 | 4.2E-16  | 56451  | succinate-CoA ligase, GDP-forming, alpha subunit                                                              |
| Sulf2      | 0.48  | -1.05 | 4.9E-10 | 1.3E-11  | 72043  | sulfatase 2                                                                                                   |
| Sulf1a1    | 2.28  | 1.19  | 2.9E-07 | 1.2E-08  | 20887  | sulfotransferase family 1A, phenol-preferring, member 1                                                       |
| Susd4      | 0.49  | -1.04 | 1.6E-03 | 1.7E-04  | 96955  | sushi domain containing 4                                                                                     |
| Suv39h2    | 0.54  | -0.88 | 7.5E-05 | 5.2E-06  | 64707  | suppressor of variegation 3-9 homolog 2                                                                       |
| Syb2       | 1.86  | 0.90  | 2.0E-03 | 2.1E-04  | 64176  | synaptic vesicle glycoprotein 2 b                                                                             |
| Syl        | 1.51  | 0.59  | 7.2E-05 | 5.0E-06  | 225115 | supervillin                                                                                                   |
| Syn2       | 3.34  | 1.74  | 9.5E-08 | 3.6E-09  | 20965  | synapsin II                                                                                                   |
| Syn3       | 1.66  | 0.73  | 5.0E-05 | 3.3E-06  | 68828  | syncoilin                                                                                                     |
| Synj2      | 1.76  | 0.82  | 1.0E-06 | 4.5E-08  | 20975  | synaptojanin 2                                                                                                |
| Synn       | 3.15  | 1.65  | 4.2E-15 | 6.4E-17  | 233335 | synemin, intermediate filament protein                                                                        |
| Synpo2     | 2.91  | 1.54  | 2.9E-16 | 3.7E-18  | 118449 | synaptopodin 2                                                                                                |
| Synpo21    | 1.95  | 0.96  | 1.9E-07 | 7.4E-09  | 68760  | synaptopodin 2-like                                                                                           |
| Sypl2      | 5.76  | 2.53  | 5.6E-33 | 1.6E-35  | 17306  | synaptophysin-like 2                                                                                          |
| Tacc2      | 1.66  | 0.73  | 5.3E-08 | 1.9E-09  | 57752  | transforming, acidic coiled-coil containing protein 2                                                         |
| Tagln      | 1.78  | 0.83  | 1.3E-07 | 5.2E-09  | 21345  | transgelin                                                                                                    |
| Tap2       | 1.70  | 0.77  | 3.4E-03 | 3.9E-04  | 21355  | transporter 2, ATP-binding cassette, sub-family B (MDR/TAP)                                                   |
| Tarsl2     | 2.11  | 1.07  | 2.1E-11 | 4.9E-13  | 272396 | threonyl-tRNA synthetase-like 2                                                                               |
| Tasl1      | 1.83  | 0.87  | 4.8E-03 | 4.7E-04  | 110326 | taste receptor, type 1, member 1                                                                              |
| Tbcl10a    | 0.64  | -0.64 | 3.2E-03 | 3.6E-04  | 103724 | TBC1 domain family, member 10a                                                                                |
| Tbcl44     | 1.59  | 0.67  | 2.2E-05 | 1.4E-06  | 210789 | TBC1 domain family, member 4                                                                                  |
| Tbx18      | 0.63  | -0.66 | 3.3E-05 | 2.1E-06  | 76365  | T-box18                                                                                                       |
| Tbx5       | 0.39  | -1.37 | 1.5E-05 | 8.5E-07  | 21388  | T-box 5                                                                                                       |
| Tcaim      | 1.73  | 0.79  | 6.6E-04 | 5.9E-05  | 382117 | T cell activation inhibitor, mitochondrial                                                                    |
| Tcap       | 4.12  | 2.04  | 1.2E-26 | 6.3E-29  | 21393  | titin-cap                                                                                                     |
| Tcea3      | 2.70  | 1.43  | 3.9E-19 | 3.9E-21  | 21401  | transcription elongation factor A (SII), 3                                                                    |
| Tceall     | 1.82  | 0.86  | 4.5E-06 | 2.3E-07  | 237052 | transcription elongation factor A (SII)-like 1                                                                |

|           |       |       |         |         |           |                                                                    |
|-----------|-------|-------|---------|---------|-----------|--------------------------------------------------------------------|
| Tecal3    | 1.79  | 0.84  | 2.7E-06 | 1.3E-07 | 594844    | transcription elongation factor A (SII)-like 3                     |
| Tecal5    | 2.46  | 1.30  | 7.6E-13 | 1.5E-14 | 331532    | transcription elongation factor A (SII)-like 5                     |
| Tecal7    | 3.71  | 1.89  | 7.7E-15 | 1.2E-16 | 100040972 | transcription elongation factor A (SII)-like 7                     |
| Tcch      | 0.44  | -1.20 | 2.5E-05 | 1.5E-06 | 99681     | trichohyalin                                                       |
| Tcp1112   | 2.07  | 1.05  | 9.9E-12 | 2.2E-13 | 216198    | t-complex 11 like 2                                                |
| Tdrkh     | 1.66  | 0.73  | 4.1E-03 | 4.9E-04 | 72634     | tudor and KH domain containing protein                             |
| Tdrp      | 3.12  | 1.64  | 2.1E-11 | 5.0E-13 | 72148     | testis development related protein                                 |
| Tead3     | 0.65  | -0.62 | 1.3E-03 | 1.3E-03 | 21678     | TEA domain family member 3                                         |
| Tecr1     | 2.44  | 1.29  | 8.7E-07 | 3.9E-08 | 243078    | trans-2,3-enoyl-CoA reductase-like                                 |
| Tef       | 1.94  | 0.95  | 1.4E-12 | 2.9E-14 | 21685     | thyrotroph embryonic factor                                        |
| Tefm      | 1.56  | 0.64  | 6.4E-03 | 8.4E-04 | 68550     | transcription elongation factor, mitochondrial                     |
| Tekt5     | 2.40  | 1.26  | 4.4E-06 | 2.2E-07 | 70426     | tektin 5                                                           |
| Tenm2     | 0.38  | -1.41 | 1.6E-03 | 1.7E-04 | 23964     | teneurin transmembrane protein 2                                   |
| Tert      | 0.49  | -1.04 | 1.0E-04 | 7.2E-06 | 21752     | telomerase reverse transcriptase                                   |
| Tes       | 0.50  | -1.01 | 5.8E-05 | 3.9E-06 | 21753     | testis derived transcript                                          |
| Tesc      | 0.28  | -1.83 | 1.4E-03 | 1.4E-04 | 57816     | tescalcin                                                          |
| Tet2      | 1.86  | 0.89  | 1.0E-10 | 2.6E-12 | 214133    | tet methylcytosine dioxygenase 2                                   |
| Tfap2b    | 0.24  | -2.07 | 6.4E-03 | 8.4E-04 | 21419     | transcription factor AP-2 beta                                     |
| Tfdp2     | 1.56  | 0.64  | 3.0E-06 | 1.5E-07 | 211586    | transcription factor Dp 2                                          |
| Tfeb      | 2.37  | 1.24  | 2.7E-12 | 5.9E-14 | 21425     | transcription factor EB                                            |
| Tfp2      | 1.73  | 0.79  | 6.4E-03 | 8.4E-04 | 21789     | tissue factor pathway inhibitor 2                                  |
| Tfrc      | 2.02  | 1.02  | 2.5E-13 | 4.7E-15 | 22042     | transferrin receptor                                               |
| Tfsc      | 0.36  | -1.48 | 2.1E-04 | 1.6E-05 | 21802     | transforming growth factor alpha                                   |
| Tgm2      | 5.26  | 2.39  | 6.1E-45 | 6.4E-48 | 21817     | transglutaminase 2, C polypeptide                                  |
| Thrsp     | 13.51 | 3.76  | 1.1E-20 | 9.9E-23 | 21835     | thyroid hormone responsive                                         |
| Tiam1     | 0.46  | -1.11 | 5.6E-04 | 4.9E-05 | 21844     | T cell lymphoma invasion and metastasis 1                          |
| Timeless  | 0.66  | -0.60 | 3.3E-05 | 2.0E-06 | 21853     | timeless homolog                                                   |
| Tll2      | 0.45  | -1.15 | 7.3E-05 | 5.0E-06 | 24087     | tolloid-like 2                                                     |
| Tln2      | 1.67  | 0.74  | 3.5E-06 | 1.8E-07 | 70549     | talín 2                                                            |
| Tm6sf1    | 2.87  | 1.52  | 1.1E-17 | 1.2E-19 | 107769    | transmembrane 6 superfamily member 1                               |
| Tm7sf2    | 1.88  | 0.91  | 6.4E-07 | 2.8E-08 | 73166     | transmembrane 7 superfamily member 2                               |
| Tmem108   | 0.43  | -1.21 | 1.3E-05 | 7.6E-07 | 81907     | transmembrane protein 108                                          |
| Tmem116   | 2.92  | 1.55  | 2.8E-09 | 8.4E-11 | 77462     | transmembrane protein 116                                          |
| Tmem117   | 2.83  | 1.50  | 3.3E-12 | 7.2E-14 | 320709    | transmembrane protein 117                                          |
| Tmem12c   | 0.46  | -1.12 | 7.5E-05 | 5.2E-06 | 208213    | transmembrane protein 132C                                         |
| Tmem143   | 2.32  | 1.21  | 2.9E-10 | 7.7E-12 | 70209     | transmembrane protein 143                                          |
| Tmem151b  | 0.42  | -1.25 | 5.4E-04 | 4.7E-05 | 210573    | transmembrane protein 151B                                         |
| Tmem170b  | 0.43  | 0.71  | 1.5E-06 | 6.8E-08 | 621976    | transmembrane protein 170B                                         |
| Tmem182   | 3.43  | 1.78  | 3.0E-18 | 3.2E-20 | 381339    | transmembrane protein 182                                          |
| Tmem184a  | 0.37  | -1.45 | 4.8E-04 | 4.1E-05 | 231832    | transmembrane protein 184a                                         |
| Tmem200b  | 0.62  | -0.69 | 4.6E-03 | 5.6E-04 | 623230    | transmembrane protein 200B                                         |
| Tmem233   | 7.44  | 2.89  | 1.6E-21 | 1.3E-23 | 545798    | transmembrane protein 233                                          |
| Tmem25    | 2.33  | 1.22  | 5.1E-05 | 3.4E-06 | 71687     | transmembrane protein 25                                           |
| Tmem252   | 1.59  | 0.67  | 4.7E-03 | 5.8E-04 | 226040    | transmembrane protein 252                                          |
| Tmem255a  | 1.74  | 0.80  | 4.9E-09 | 1.5E-10 | 245386    | ransmembrane protein 255A                                          |
| Tmem26    | 0.53  | -0.91 | 1.4E-07 | 5.3E-09 | 327766    | transmembrane protein 26                                           |
| Tmem30b   | 0.50  | -1.01 | 1.8E-06 | 8.7E-08 | 238257    | transmembrane protein 30B                                          |
| Tmem37    | 2.33  | 1.22  | 1.2E-06 | 5.6E-08 | 170706    | transmembrane protein 37                                           |
| Tmem38a   | 3.45  | 1.79  | 6.9E-27 | 3.5E-29 | 74166     | transmembrane protein 38A                                          |
| Tmem38b   | 2.35  | 1.23  | 1.8E-13 | 3.4E-15 | 52076     | transmembrane protein 38B                                          |
| Tmem50b   | 0.57  | -0.80 | 4.6E-05 | 3.0E-06 | 77975     | transmembrane protein 50B                                          |
| Tmem51    | 0.54  | -0.88 | 7.3E-04 | 6.6E-05 | 214359    | transmembrane protein 51                                           |
| Tmem52    | 17.48 | 4.13  | 1.0E-32 | 3.0E-35 | 69671     | transmembrane protein 52                                           |
| Tmem53    | 2.04  | 1.03  | 9.1E-04 | 8.5E-05 | 68777     | transmembrane protein 53                                           |
| Tmem70    | 1.54  | 0.62  | 1.9E-05 | 1.1E-06 | 70397     | transmembrane protein 70                                           |
| Tmem72    | 9.16  | 3.20  | 2.6E-19 | 2.5E-21 | 319776    | transmembrane protein 72                                           |
| Tmem79    | 0.28  | -1.83 | 2.8E-03 | 3.2E-04 | 71913     | transmembrane protein 79                                           |
| Tmem8c    | 1.70  | 0.77  | 7.7E-05 | 5.4E-06 | 66139     | transmembrane protein 8C                                           |
| Tmem97    | 0.60  | -0.74 | 3.3E-06 | 1.6E-07 | 69071     | transmembrane protein 97                                           |
| Tmod1     | 2.92  | 1.55  | 4.0E-17 | 4.8E-19 | 21916     | tropomodulin 1                                                     |
| Tmod4     | 6.11  | 2.61  | 4.8E-42 | 6.0E-45 | 50874     | tropomodulin 4                                                     |
| Tmtc1     | 1.83  | 0.87  | 3.8E-06 | 1.9E-07 | 387314    | transmembrane and tetratricopeptide repeat containing 1            |
| Tnfaip3   | 1.68  | 0.75  | 1.0E-03 | 9.7E-05 | 21929     | tumor necrosis factor, alpha-induced protein 3                     |
| Tnfsf10   | 2.63  | 1.40  | 1.2E-05 | 6.7E-07 | 22035     | tumor necrosis factor (ligand) superfamily, member 10              |
| Tnk1      | 1.80  | 0.85  | 2.7E-06 | 1.3E-07 | 665113    | TRAF2 and NCK interacting kinase                                   |
| Tnnc2     | 5.08  | 2.34  | 3.6E-33 | 9.9E-36 | 21925     | troponin C2, fast                                                  |
| Tnnc1     | 1.55  | 0.64  | 5.8E-03 | 7.4E-04 | 21952     | troponin I, skeletal, slow 1                                       |
| Tnni2     | 6.37  | 2.67  | 1.5E-35 | 2.6E-38 | 21953     | troponin I, skeletal, fast 2                                       |
| Tnni1     | 1.69  | 0.75  | 3.6E-04 | 2.9E-05 | 21955     | troponin T1, skeletal, slow                                        |
| Tnni3     | 5.72  | 2.52  | 5.9E-31 | 2.0E-33 | 21957     | troponin T3, skeletal, fast                                        |
| Tnxb      | 2.17  | 1.12  | 1.2E-11 | 2.6E-13 | 81877     | tenascin XB                                                        |
| Tob1      | 1.85  | 0.88  | 2.1E-09 | 6.4E-11 | 22057     | transducer of ErbB-2.1                                             |
| Tob2      | 1.71  | 0.78  | 1.3E-08 | 4.2E-10 | 57259     | transducer of ERBB2, 2                                             |
| Tpbp      | 0.40  | -1.32 | 9.2E-09 | 3.0E-10 | 21983     | trophoblast glycoprotein                                           |
| Tpd5211   | 1.73  | 0.79  | 1.0E-03 | 9.7E-05 | 21987     | tumor protein D52-like 1                                           |
| Tpi1      | 2.17  | 1.12  | 1.8E-15 | 2.6E-17 | 21991     | triosephosphate isomerase 1                                        |
| Tpm1      | 5.03  | 2.33  | 1.5E-34 | 3.3E-37 | 22003     | tropomyosin 1, alpha                                               |
| Tpm2      | 3.46  | 1.79  | 2.8E-23 | 2.0E-25 | 22004     | tropomyosin 2, beta                                                |
| Tppp      | 2.75  | 1.46  | 4.7E-14 | 8.1E-16 | 72948     | tubulin polymerization promoting protein                           |
| Tppp3     | 2.20  | 1.14  | 3.6E-07 | 1.5E-08 | 67971     | tubulin polymerization-promoting protein family member 3           |
| Tpsg1     | 0.55  | -0.88 | 2.7E-03 | 3.0E-04 | 26945     | trypsin gamma 1                                                    |
| Traf3ip3  | 2.22  | 1.15  | 8.1E-14 | 1.4E-15 | 215243    | TRAF3 interacting protein 3                                        |
| Traip     | 0.59  | -0.76 | 5.0E-03 | 6.3E-04 | 22036     | TRAF-interacting protein                                           |
| Trak1     | 1.68  | 0.75  | 5.6E-08 | 2.1E-09 | 67095     | trafficking protein, kinesin binding 1                             |
| Trdn      | 6.42  | 2.68  | 8.0E-32 | 2.5E-34 | 76757     | triadin                                                            |
| Trf       | 2.24  | 1.17  | 4.0E-05 | 2.6E-06 | 22041     | transferrin                                                        |
| Tril      | 0.65  | -0.61 | 8.3E-05 | 5.8E-06 | 66873     | TLR4 interactor with leucine-rich repeats                          |
| Trim2     | 0.53  | -0.92 | 6.5E-05 | 4.5E-06 | 80890     | tripartite motif-containing 2                                      |
| Trim35    | 2.07  | 1.05  | 4.4E-11 | 1.1E-12 | 66854     | tripartite motif-containing 35                                     |
| Trim47    | 1.84  | 0.88  | 5.8E-09 | 1.8E-10 | 217333    | tripartite motif-containing 47                                     |
| Trim54    | 2.88  | 1.53  | 1.2E-18 | 1.3E-20 | 58522     | tripartite motif-containing 54                                     |
| Trim62    | 0.59  | -0.75 | 3.8E-03 | 4.5E-04 | 67525     | tripartite motif-containing 62                                     |
| Trim63    | 2.36  | 1.24  | 4.0E-08 | 1.4E-09 | 433766    | tripartite motif-containing 63                                     |
| Trim72    | 2.67  | 1.42  | 1.1E-14 | 1.8E-16 | 434246    | tripartite motif-containing 72                                     |
| Trm61a    | 0.56  | -0.83 | 1.3E-04 | 9.2E-06 | 328152    | tRNA methyltransferase 61 homolog A                                |
| Tro       | 0.65  | -0.62 | 4.1E-04 | 3.4E-05 | 56191     | trophinin                                                          |
| Trp53cor1 | 1.77  | 0.82  | 5.1E-03 | 6.4E-04 | 100504267 | tumor protein p53 pathway corepressor 1                            |
| Trp53inp2 | 3.03  | 1.60  | 7.4E-27 | 3.8E-29 | 68728     | transformation related protein 53 inducible nuclear protein 2      |
| Trp63     | 0.37  | -1.44 | 5.0E-03 | 6.2E-04 | 22061     | transformation related protein 63                                  |
| Trpt1     | 1.69  | 0.76  | 3.6E-03 | 4.3E-04 | 107328    | tRNA phosphotransferase 1                                          |
| Trpv4     | 0.52  | -0.93 | 1.6E-04 | 1.2E-05 | 63873     | transient receptor potential cation channel, subfamily V, member 4 |
| Tspan12   | 2.18  | 1.12  | 1.0E-11 | 2.4E-13 | 269831    | tetraspanin 12                                                     |
| Tspan13   | 1.95  | 0.96  | 1.5E-10 | 3.9E-12 | 66109     | tetraspanin 13                                                     |
| Tspan15   | 1.63  | 0.70  | 7.0E-04 | 6.4E-05 | 70423     | tetraspanin 15                                                     |
| Tspan17   | 1.72  | 0.78  | 2.1E-03 | 2.2E-04 | 74257     | tetraspanin 17                                                     |
| Tspan2    | 1.71  | 0.77  | 2.2E-05 | 1.3E-06 | 70747     | tetraspanin 2                                                      |
| Tspan7    | 1.58  | 0.66  | 2.3E-06 | 1.1E-07 | 21912     | tetraspanin 7                                                      |
| Tspo      | 2.06  | 1.04  | 1.7E-05 | 1.0E-06 | 12257     | translocator protein                                               |
| Tspsy14   | 0.40  | -1.33 | 6.5E-11 | 1.6E-12 | 72480     | TSPY-like 4                                                        |
| Tst       | 2.58  | 1.37  | 1.1E-05 | 6.0E-07 | 22117     | thiosulfate sulfurtransferase, mitochondrial                       |
| Tstd2     | 2.13  | 1.09  | 6.0E-12 | 1.3E-13 | 272027    | thiosulfate sulfurtransferase (rhodanese)-like domain containing 2 |
| Ttc39a    | 0.47  | -1.10 | 3.1E-04 | 2.5E-05 | 230603    | tetratricopeptide repeat domain 39A                                |
| Ttc39c    | 0.51  | -0.97 | 5.4E-04 | 4.7E-05 | 72747     | tetratricopeptide repeat domain 39C                                |
| Tte9      | 5.02  | 2.33  | 3.4E-23 | 2.5E-25 | 69480     | tetratricopeptide repeat domain 9                                  |
| Ttn       | 3.25  | 1.70  | 5.9E-13 | 1.2E-14 | 22138     | titin                                                              |
| Ttpal     | 0.57  | -0.81 | 2.5E-06 | 1.2E-07 | 76080     | tocopherol (alpha) transfer protein-like                           |
| Ttyh2     | 1.59  | 0.67  | 1.0E-05 | 5.8E-07 | 117160    | twenty homolog 2                                                   |
| Tuba4a    | 1.73  | 0.79  | 3.2E-08 | 1.1E-09 | 22145     | tubulin, alpha 4A                                                  |
| Tusc5     | 2.85  | 1.51  | 1.1E-05 | 6.0E-07 | 237858    | tumor suppressor candidate 5                                       |
| Twf2      | 1.63  | 0.71  | 3.7E-07 | 1.6E-08 | 23999     | twinstin, actin-binding protein, homolog 2                         |
| Twist1    | 0.49  | -1.03 | 9.1E-08 | 3.4E-09 | 22160     | twist homolog 1                                                    |
| Twist2    | 0.35  | -1.50 | 5.0E-04 | 4.3E-05 | 13345     | twist homolog 2                                                    |
| Txlnb     | 3.00  | 1.58  | 8.3E-19 | 8.5E-21 | 378431    | taxilin beta                                                       |
| Ttyo3     | 0.55  | -0.87 | 2.5E-07 | 9.9E-09 | 22174     | TYRO3 protein tyrosine kinase 3                                    |
| Uaca      | 1.57  | 0.65  | 3.4E-05 | 2.1E-06 | 72565     | uveal autoantigen with coiled-coil domains and ankyrin repeats     |
| Ubac1     | 2.26  | 1.18  | 1.3E-16 | 1.6E-18 | 98766     | ubiquitin associated domain containing 1                           |
| Ubc2b     | 1.54  | 0.62  | 6.1E-05 | 4.1E-06 | 22210     | ubiquitin-conjugating enzyme E2B                                   |
| Ubc2h     | 1.51  | 0.59  | 3.4E-05 | 2.1E-06 | 22214     | ubiquitin-conjugating enzyme E2H                                   |
| Ubc2ql1   | 0.37  | -1.44 | 2.8E-06 | 1.4E-07 | 76980     | ubiquitin-conjugating enzyme E2Q family-like 1                     |
| Ubl3      | 1.58  | 0.66  | 1.5E-05 | 8.5E-07 | 24109     | ubiquitin-like 3                                                   |
| Ubr3      | 1.58  | 0.66  | 6.0E-06 | 3.2E-07 | 68795     | ubiquitin protein ligase E3 component n-recogin 3                  |

|         |       |       |         |         |           |                                                                    |
|---------|-------|-------|---------|---------|-----------|--------------------------------------------------------------------|
| Uek2    | 0.59  | -0.77 | 1.6E-05 | 9.2E-07 | 80914     | uridine-cytidine kinase 2                                          |
| Uek1    | 1.80  | 0.85  | 3.4E-05 | 2.1E-06 | 68556     | uridine-cytidine kinase 1-like 1                                   |
| Uek10s  | 3.80  | 1.92  | 8.5E-14 | 1.5E-15 | 100271841 | uridine-cytidine kinase 1-like 1, opposite strand                  |
| Ucp3    | 5.56  | 2.48  | 5.1E-14 | 8.7E-16 | 22229     | uncoupling protein 3 (mitochondrial, proton carrier)               |
| Ufp1    | 1.74  | 0.80  | 1.1E-03 | 1.1E-04 | 70240     | UFM1-specific peptidase 1                                          |
| Ugp2    | 2.17  | 1.12  | 4.7E-13 | 9.3E-15 | 216558    | UDP-glucose pyrophosphorylase 2                                    |
| Uhrf1   | 0.61  | -0.72 | 1.0E-07 | 4.0E-09 | 18140     | ubiquitin-like, containing PHD and RING finger domains, 1          |
| Unc13d  | 0.50  | -1.01 | 1.7E-03 | 1.7E-04 | 70450     | unc-13 homolog D                                                   |
| Unc5b   | 1.97  | 0.98  | 8.3E-08 | 3.1E-09 | 217012    | unc-45 homolog B                                                   |
| Unc5d   | 0.22  | -2.20 | 1.7E-10 | 4.5E-12 | 210801    | unc-5 homolog D                                                    |
| Upk1b   | 0.03  | -5.32 | 1.0E-95 | 1.7E-99 | 22268     | uroplakin 1B                                                       |
| Upk3b   | 0.07  | -3.89 | 6.9E-16 | 9.5E-18 | 100647    | uroplakin 3B                                                       |
| Upk3bl  | 0.06  | -4.03 | 4.9E-27 | 2.4E-29 | 69665     | uroplakin 3B-like                                                  |
| Uqccl   | 1.53  | 0.62  | 1.5E-05 | 8.7E-07 | 56046     | ubiquinol-cytochrome c reductase complex assembly factor 1         |
| Uqer10  | 1.84  | 0.88  | 5.3E-09 | 1.7E-10 | 66152     | ubiquinol-cytochrome c reductase, complex III subunit X            |
| Uqer11  | 2.21  | 1.14  | 9.9E-11 | 2.5E-12 | 66594     | ubiquinol-cytochrome c reductase, complex III subunit XI           |
| Uqerb   | 2.01  | 1.01  | 3.0E-09 | 9.2E-11 | 67530     | ubiquinol-cytochrome c reductase binding protein                   |
| Uqerc1  | 1.83  | 0.87  | 1.3E-09 | 3.8E-11 | 22273     | ubiquinol-cytochrome c reductase core protein 1                    |
| Uqerc2  | 2.06  | 1.04  | 1.7E-14 | 2.8E-16 | 67003     | ubiquinol cytochrome c reductase core protein 2                    |
| Uqerf1  | 2.15  | 1.10  | 3.1E-14 | 5.2E-16 | 66694     | ubiquinol-cytochrome c reductase, Rieske iron-sulfur polypeptide 1 |
| Uqerh   | 1.80  | 0.85  | 7.1E-10 | 2.0E-11 | 66576     | ubiquinol-cytochrome c reductase hinge protein                     |
| Uqerq   | 1.86  | 0.89  | 1.4E-09 | 3.9E-11 | 22272     | ubiquinol-cytochrome c reductase, complex III subunit VII          |
| Ush1p1  | 1.62  | 0.70  | 3.1E-03 | 3.5E-04 | 234395    | Usher syndrome 1C binding protein 1                                |
| Usmg5   | 1.85  | 0.89  | 7.3E-04 | 6.7E-05 | 66477     | upregulated during skeletal muscle growth 5                        |
| Usp13   | 2.76  | 1.46  | 1.6E-14 | 2.5E-16 | 72607     | ubiquitin specific peptidase 13 (isopeptidase T-3)                 |
| Usp2    | 3.25  | 1.70  | 6.0E-24 | 4.1E-26 | 53376     | ubiquitin specific peptidase 2                                     |
| Usp28   | 2.05  | 1.03  | 2.0E-10 | 5.3E-12 | 235323    | ubiquitin specific peptidase 28                                    |
| Uvrag   | 1.56  | 0.64  | 2.4E-05 | 1.4E-06 | 78610     | UV radiation resistance associated gene                            |
| Vangl2  | 0.58  | -0.79 | 8.3E-04 | 7.7E-05 | 93840     | vang-like 2 (van gogh)                                             |
| Vav3    | 0.54  | -0.89 | 4.5E-03 | 5.5E-04 | 57257     | vav 3 oncogene                                                     |
| Vcam1   | 0.62  | -0.69 | 5.9E-06 | 3.1E-07 | 22329     | vascular cell adhesion molecule 1                                  |
| Vdac1   | 1.77  | 0.83  | 1.8E-09 | 5.5E-11 | 22333     | voltage-dependent anion channel 1                                  |
| Vdac2   | 1.79  | 0.84  | 1.9E-08 | 6.4E-10 | 22334     | voltage-dependent anion channel 2                                  |
| Vdac3   | 1.51  | 0.59  | 3.2E-05 | 2.0E-06 | 22335     | voltage-dependent anion channel 3                                  |
| Vegfa   | 1.52  | 0.60  | 4.8E-06 | 2.5E-07 | 22339     | vascular endothelial growth factor A                               |
| Vegfb   | 1.59  | 0.67  | 3.6E-05 | 2.3E-06 | 22340     | vascular endothelial growth factor B                               |
| Vill    | 0.56  | -0.84 | 2.3E-03 | 2.4E-04 | 22351     | villin-like                                                        |
| Vldlr   | 1.86  | 0.90  | 2.2E-08 | 7.4E-10 | 22359     | very low density lipoprotein receptor                              |
| Vps13c  | 1.63  | 0.70  | 1.4E-03 | 1.4E-04 | 320528    | vacuolar protein sorting 13C                                       |
| Vsig8   | 0.03  | -5.28 | 7.8E-44 | 8.9E-47 | 240916    | V-set and immunoglobulin domain containing 8                       |
| Vtn     | 3.00  | 1.58  | 3.8E-07 | 1.6E-08 | 22370     | vitronectin                                                        |
| Vwe2    | 2.79  | 1.48  | 1.6E-11 | 3.8E-13 | 319922    | von Willebrand factor C domain containing 2                        |
| Vwee    | 0.53  | -0.92 | 1.8E-03 | 1.8E-04 | 71768     | von Willebrand factor C and EGF domains                            |
| Vwf     | 1.71  | 0.77  | 1.3E-07 | 5.1E-09 | 22371     | Von Willebrand factor homolog                                      |
| Wbser17 | 2.27  | 1.19  | 3.1E-19 | 3.0E-21 | 212996    | Williams-Beuren syndrome chromosome region 17 homolog              |
| Wdr44   | 1.79  | 0.84  | 8.9E-06 | 4.9E-07 | 72404     | WD repeat domain 44                                                |
| Wfdc1   | 6.31  | 2.66  | 4.6E-19 | 4.6E-21 | 67866     | WAP four-disulfide core domain 1                                   |
| Wipf3   | 1.67  | 0.74  | 4.1E-03 | 4.9E-04 | 330319    | WAS/WASL interacting protein family, member 3                      |
| Wnk2    | 2.07  | 1.05  | 1.2E-14 | 1.8E-16 | 75607     | WNK lysine deficient protein kinase 2                              |
| Wnk4    | 0.49  | -1.04 | 1.5E-04 | 1.1E-05 | 69847     | WNK lysine deficient protein kinase 4                              |
| Wnt10a  | 0.37  | -1.44 | 2.8E-03 | 3.1E-04 | 22409     | wingless related MMTV integration site 10a                         |
| Wnt5a   | 0.59  | -0.77 | 2.3E-08 | 7.8E-10 | 22418     | wingless-related MMTV integration site 5A                          |
| Wnt6    | 0.36  | -1.46 | 3.2E-04 | 2.6E-05 | 22420     | wingless-related MMTV integration site 6                           |
| Wnt7b   | 0.18  | -2.49 | 4.4E-04 | 3.6E-05 | 22422     | wingless-related MMTV integration site 7B                          |
| Wscd2   | 0.39  | -1.36 | 1.8E-06 | 8.5E-08 | 320916    | WSC domain containing 2                                            |
| Wwe1    | 0.37  | -1.45 | 3.0E-04 | 2.4E-05 | 211652    | WW, C2 and coiled-coil domain containing 1                         |
| Wwp2    | 0.63  | -0.66 | 2.8E-03 | 3.2E-04 | 66894     | WW domain containing E3 ubiquitin protein ligase 2                 |
| Xirp1   | 3.12  | 1.64  | 5.4E-15 | 8.3E-17 | 22437     | xin actin-binding repeat containing 1                              |
| Xirp2   | 12.13 | 3.60  | 2.3E-22 | 1.7E-24 | 241431    | xin actin-binding repeat containing 2                              |
| Xk      | 2.82  | 1.50  | 1.0E-10 | 2.7E-12 | 22439     | Kell blood group precursor (McLeod phenotype) homolog              |
| Xylb    | 0.57  | -0.82 | 5.3E-04 | 4.6E-05 | 102448    | xylulokinase homolog                                               |
| Ydjc    | 0.46  | -1.13 | 4.2E-04 | 3.5E-05 | 69101     | YdJC homolog                                                       |
| Yipf7   | 5.84  | 2.55  | 2.1E-28 | 9.3E-31 | 75581     | Yip1 domain family, member 7                                       |
| Zak     | 2.23  | 1.16  | 1.6E-11 | 3.6E-13 | 65964     | sterile alpha motif and leucine zipper containing kinase AZK       |
| Zbtb16  | 3.01  | 1.59  | 1.1E-13 | 2.0E-15 | 235320    | zinc finger and BTB domain containing 16                           |
| Zbtb18  | 1.57  | 0.65  | 2.9E-04 | 2.3E-05 | 30928     | zinc finger and BTB domain containing 18                           |
| Zc3h6   | 1.65  | 0.72  | 3.5E-03 | 4.1E-04 | 78751     | zinc finger CCHC type containing 6                                 |
| Zdbf2   | 2.05  | 1.03  | 8.8E-06 | 4.8E-07 | 73884     | zinc finger, DBF-type containing 2                                 |
| Zfp184  | 0.49  | -1.04 | 1.7E-03 | 1.8E-04 | 193452    | zinc finger protein 184 (Kruppel-like)                             |
| Zfp185  | 0.45  | -1.16 | 8.6E-13 | 1.7E-14 | 22673     | zinc finger protein 185                                            |
| Zfp239  | 0.49  | -1.04 | 5.0E-04 | 4.3E-05 | 22685     | zinc finger protein 239                                            |
| Zfp503  | 0.63  | -0.66 | 7.7E-06 | 4.2E-07 | 218820    | zinc finger protein 503                                            |
| Zfp518b | 0.67  | -0.59 | 3.5E-04 | 2.8E-05 | 100515    | zinc finger protein 518B                                           |
| Zfp568  | 1.66  | 0.73  | 1.7E-04 | 1.2E-05 | 243905    | zinc finger protein 568                                            |
| Zfp57   | 0.57  | -0.80 | 1.2E-04 | 8.8E-06 | 22715     | zinc finger protein 57                                             |
| Zfp599  | 0.49  | -1.04 | 5.5E-04 | 4.8E-05 | 235048    | zinc finger protein 599                                            |
| Zfp641  | 2.79  | 1.48  | 1.0E-08 | 3.2E-10 | 239652    | zinc finger protein 641                                            |
| Zfp711  | 0.59  | -0.75 | 1.8E-03 | 1.9E-04 | 245595    | zinc finger protein 711                                            |
| Zim1    | 1.66  | 0.73  | 2.0E-04 | 1.5E-05 | 22776     | zinc finger, imprinted 1                                           |
| Zscan18 | 1.56  | 0.64  | 2.5E-03 | 2.7E-04 | 232875    | zinc finger and SCAN domain containing 18                          |

upregulated (red)  
downregulated (blue)

Supplementary Table Id: Differentially expressed genes in TA of Spin1<sup>MS</sup> compared to control mice at P21.

| Gene symbol   | FC (Spin1 <sup>MS</sup> vs. Ctrl) | logFC (Spin1 <sup>MS</sup> vs. Ctrl) | FDR     | p-value | Entrez gene | Protein name                                                                                    |
|---------------|-----------------------------------|--------------------------------------|---------|---------|-------------|-------------------------------------------------------------------------------------------------|
| 1500017E21Rik | 2.18                              | 1.13                                 | 2.6E-06 | 7.4E-08 | 668215      | RIKEN cDNA 1500017E21 gene                                                                      |
| 1700009P17Rik | 2.51                              | 1.33                                 | 1.1E-04 | 5.4E-06 | 75472       | RIKEN cDNA 1700009P17 gene                                                                      |
| 1700016C15Rik | 5.46                              | 2.45                                 | 1.1E-11 | 8.1E-14 | 69428       | RIKEN cDNA 1700016C15 gene                                                                      |
| 1700020I14Rik | 0.33                              | -1.61                                | 2.1E-05 | 7.9E-07 | 66602       | RIKEN cDNA 1700020I14 gene                                                                      |
| 1700056E22Rik | 4.38                              | 2.13                                 | 2.3E-08 | 3.4E-10 | 73363       | RIKEN cDNA 1700056E22 gene                                                                      |
| 1700088E04Rik | 1.88                              | 0.91                                 | 4.4E-06 | 1.3E-07 | 27660       | RIKEN cDNA 1700088E04 gene                                                                      |
| 1810041L15Rik | 10.91                             | 3.45                                 | 1.0E-50 | 2.0E-54 | 72301       | RIKEN cDNA 1810041L15 gene                                                                      |
| 1810058I24Rik | 2.41                              | 1.27                                 | 4.0E-11 | 3.3E-13 | 67705       | RIKEN cDNA 1810058I24 gene                                                                      |
| 2010015L04Rik | 2.31                              | 1.21                                 | 2.6E-05 | 1.0E-06 | 544678      | RIKEN cDNA 2010015L04 gene                                                                      |
| 2010300C02Rik | 3.07                              | 1.62                                 | 3.3E-05 | 1.3E-06 | 72097       | RIKEN cDNA 2010300C02 gene                                                                      |
| 2310002L09Rik | 0.38                              | -1.40                                | 6.6E-18 | 1.8E-20 | 71886       | RIKEN cDNA 2310002L09 gene                                                                      |
| 2310007L24Rik | 1.96                              | 0.97                                 | 4.4E-05 | 1.9E-06 | 75573       | RIKEN cDNA 2310007L24 gene                                                                      |
| 2310016D03Rik | 0.24                              | -2.07                                | 6.0E-07 | 1.3E-08 | 69566       | RIKEN cDNA 2310016D03 gene                                                                      |
| 2310020H05Rik | 3.95                              | 1.98                                 | 9.3E-20 | 2.1E-22 | 69603       | RIKEN cDNA 2310020H05 gene                                                                      |
| 2310022B05Rik | 2.89                              | 1.53                                 | 2.5E-08 | 3.6E-10 | 69551       | RIKEN cDNA 2310022B05 gene                                                                      |
| 2310057M21Rik | 2.14                              | 1.10                                 | 2.1E-11 | 1.6E-13 | 68277       | RIKEN cDNA 2310057M21 gene                                                                      |
| 2310065F04Rik | 0.20                              | -2.30                                | 2.4E-14 | 1.1E-16 | 74184       | RIKEN cDNA 2310065F04 gene                                                                      |
| 2310067B10Rik | 0.57                              | -0.80                                | 1.8E-04 | 1.0E-05 | 71947       | RIKEN cDNA 2310067B10 gene                                                                      |
| 2610002J02Rik | 2.81                              | 1.49                                 | 1.9E-05 | 6.9E-07 | 67513       | RIKEN cDNA 2610002J02 gene                                                                      |
| 2610507B11Rik | 0.59                              | -0.77                                | 4.8E-06 | 1.4E-07 | 72503       | RIKEN cDNA 2610507B11 gene                                                                      |
| 2900079G21Rik | 6.30                              | 2.66                                 | 9.9E-10 | 1.1E-11 | 620760      | RIKEN cDNA 2900079G21 gene                                                                      |
| 3110057O12Rik | 0.50                              | -0.90                                | 2.7E-05 | 1.1E-06 | 269423      | RIKEN cDNA 3110057O12 gene                                                                      |
| 3425401B19Rik | 0.64                              | -0.64                                | 4.0E-05 | 1.7E-06 | 100504518   | RIKEN cDNA 3425401B19 gene                                                                      |
| 3632451O06Rik | 7.90                              | 2.98                                 | 9.4E-26 | 1.4E-28 | 67419       | RIKEN cDNA 3632451O06 gene                                                                      |
| 4430402I18Rik | 5.04                              | 2.33                                 | 4.6E-08 | 7.4E-10 | 381218      | RIKEN cDNA 4430402I18 gene                                                                      |
| 4833412C05Rik | 102.58                            | 6.68                                 | 8.5E-94 | 2.8E-98 | 73904       | RIKEN cDNA 4833412C05 gene                                                                      |
| 4930413G21Rik | 2.51                              | 1.33                                 | 1.7E-05 | 6.1E-07 | 73951       | RIKEN cDNA 4930413G21 gene                                                                      |
| 4930513N10Rik | 2.88                              | 1.53                                 | 9.7E-05 | 4.8E-06 | 319960      | RIKEN cDNA 4930513N10 gene                                                                      |
| 5330439B14Rik | 0.46                              | -1.11                                | 1.6E-05 | 5.9E-07 | 321015      | RIKEN cDNA 5330439B14 gene                                                                      |
| 5730508B09Rik | 2.22                              | 1.15                                 | 3.8E-06 | 1.1E-07 | 70617       | RIKEN cDNA 5730508B09 gene                                                                      |
| 5930412G12Rik | 3.10                              | 1.63                                 | 6.6E-22 | 1.3E-24 | 319616      | RIKEN cDNA 5930412G12 gene                                                                      |
| 6030419C18Rik | 1.89                              | 0.92                                 | 1.8E-07 | 3.5E-09 | 319477      | RIKEN cDNA 6030419C18 gene                                                                      |
| A230073K19Rik | 0.59                              | -0.75                                | 9.9E-05 | 4.9E-06 | 613263      | RIKEN cDNA A230073K19 gene                                                                      |
| A4galt        | 4.54                              | 2.18                                 | 5.5E-11 | 4.7E-13 | 239559      | alpha 1,4-galactosyltransferase                                                                 |
| A630019I02Rik | 0.18                              | -2.48                                | 1.2E-05 | 4.0E-07 | 408254      | uncharacterized LOC408254                                                                       |
| A930003A15Rik | 3.81                              | 1.93                                 | 1.7E-12 | 1.0E-14 | 68162       | RIKEN cDNA A930003A15 gene                                                                      |
| Aacs          | 2.83                              | 1.50                                 | 6.0E-10 | 6.2E-12 | 78894       | acetoacetyl-CoA synthetase                                                                      |
| Aatk          | 2.26                              | 1.18                                 | 2.0E-08 | 2.8E-10 | 11302       | apoptosis-associated tyrosine kinase                                                            |
| Abcc4         | 0.47                              | -1.08                                | 1.7E-06 | 4.4E-08 | 239273      | ATP-binding cassette, sub-family C (CFTR/MRP), member 4                                         |
| Abcc9         | 0.56                              | -0.85                                | 3.2E-08 | 4.7E-10 | 20928       | ATP-binding cassette, sub-family C (CFTR/MRP), member 9                                         |
| Abcd1         | 0.61                              | -0.71                                | 1.1E-05 | 3.7E-07 | 11666       | ATP-binding cassette, sub-family D (ALD), member 1                                              |
| Abeg2         | 2.36                              | 1.24                                 | 1.0E-10 | 9.2E-13 | 26357       | ATP-binding cassette, sub-family G (WHITE), member 2                                            |
| Abi2          | 1.78                              | 0.84                                 | 3.6E-05 | 1.5E-06 | 329165      | abi-interactor 2                                                                                |
| Acad11        | 0.58                              | -0.80                                | 4.9E-06 | 1.5E-07 | 102632      | acyl-Coenzyme A dehydrogenase family, member 11                                                 |
| Acadv1        | 0.58                              | -0.78                                | 4.0E-06 | 1.2E-07 | 11370       | acyl-Coenzyme A dehydrogenase, very long chain                                                  |
| Acer2         | 3.47                              | 1.80                                 | 1.6E-04 | 8.4E-06 | 230379      | alkaline ceramidase 2                                                                           |
| Ache          | 2.19                              | 1.13                                 | 1.4E-07 | 2.6E-09 | 11423       | acetylcholinesterase                                                                            |
| Ackr1         | 4.95                              | 2.31                                 | 2.9E-07 | 5.8E-09 | 13349       | atypical chemokine receptor 1                                                                   |
| Acoi10        | 2.67                              | 1.42                                 | 1.9E-16 | 6.8E-19 | 64833       | acyl-CoA thioesterase 10                                                                        |
| Acoi9         | 2.45                              | 1.30                                 | 3.2E-15 | 1.3E-17 | 56360       | acyl-CoA thioesterase 9                                                                         |
| Acp5          | 4.51                              | 2.17                                 | 1.2E-07 | 2.3E-09 | 11433       | acid phosphatase 5, tartrate resistant                                                          |
| Actn3         | 0.55                              | -0.86                                | 2.4E-06 | 6.4E-08 | 11474       | actinin alpha 3                                                                                 |
| Actr3b        | 3.28                              | 1.71                                 | 2.4E-06 | 6.7E-08 | 242894      | ARP3 actin-related protein 3B                                                                   |
| Acrv1b        | 0.57                              | -0.81                                | 1.3E-05 | 4.7E-07 | 11479       | activin A receptor, type 1B                                                                     |
| Acrv1c        | 7.96                              | 2.99                                 | 4.7E-12 | 3.1E-14 | 269275      | activin A receptor, type 1C                                                                     |
| Adam23        | 3.56                              | 1.83                                 | 7.0E-07 | 1.6E-08 | 23792       | a disintegrin and metalloproteinase domain 23                                                   |
| Adam33        | 3.37                              | 1.75                                 | 1.0E-08 | 1.4E-10 | 110751      | a disintegrin and metalloproteinase domain 33                                                   |
| Adamts20      | 2.30                              | 1.20                                 | 6.7E-11 | 5.8E-13 | 223838      | a disintegrin-like and metalloproteinase (reprolysin type) with thrombospondin type 1 motif, 20 |
| Adap1         | 10.41                             | 3.38                                 | 4.2E-18 | 1.1E-20 | 231821      | ArfGAP with dual PH domains 1                                                                   |
| Adey1         | 2.35                              | 1.23                                 | 1.2E-08 | 1.6E-10 | 432530      | adenylate cyclase 1                                                                             |
| Adey9         | 0.52                              | -0.94                                | 7.2E-07 | 1.7E-08 | 11515       | adenylate cyclase 9                                                                             |
| Adig          | 4.37                              | 2.13                                 | 1.0E-05 | 3.5E-07 | 246747      | adipogenin                                                                                      |
| Adipoq        | 6.99                              | 2.81                                 | 3.6E-11 | 2.9E-13 | 11450       | adiponectin, C1Q and collagen domain containing                                                 |
| Adk           | 0.46                              | -1.14                                | 1.8E-06 | 4.8E-08 | 11534       | adenosine kinase                                                                                |
| Adsl          | 0.58                              | -0.78                                | 3.2E-06 | 9.0E-08 | 11564       | adenylosuccinate lyase                                                                          |
| AF357359      | 5.34                              | 2.42                                 | 4.4E-14 | 2.1E-16 | 100303647   | snRNA AF357359                                                                                  |
| Afmid         | 1.78                              | 0.83                                 | 1.7E-04 | 9.5E-06 | 71562       | arylfornamidase                                                                                 |
| Agap3         | 1.68                              | 0.75                                 | 4.5E-05 | 1.9E-06 | 213990      | ArfGAP with GTPase domain, ankyrin repeat and PH domain 3                                       |
| Agbl1         | 0.25                              | -2.03                                | 1.4E-15 | 5.4E-18 | 244071      | ATP/GTP binding protein-like 1                                                                  |
| Agf           | 0.53                              | -0.92                                | 4.6E-08 | 7.4E-10 | 77559       | amylase-1,6-glycosidase, 4-alpha-glucanotransferase                                             |
| Ago3          | 0.39                              | -1.35                                | 3.3E-05 | 1.3E-06 | 214150      | angiotensin II, type 1 receptor-associated protein                                              |
| Agtrap        | 2.49                              | 1.32                                 | 6.2E-17 | 2.0E-19 | 11610       | angiotensin II receptor-associated protein                                                      |
| A1413582      | 2.66                              | 1.41                                 | 9.3E-05 | 4.5E-06 | 106672      | expressed sequence A1413582                                                                     |
| Ak4           | 4.85                              | 2.28                                 | 6.2E-10 | 6.4E-12 | 11639       | adenylate kinase 4                                                                              |
| Akap11        | 2.07                              | 1.05                                 | 3.4E-05 | 1.4E-06 | 219181      | A kinase (PKA) anchor protein 11                                                                |
| Akap5         | 0.26                              | -1.96                                | 7.1E-06 | 2.3E-07 | 238276      | A kinase (PKA) anchor protein 5                                                                 |
| Akap9         | 0.60                              | -0.74                                | 3.8E-05 | 1.6E-06 | 100986      | A kinase (PKA) anchor protein (yotiao) 9                                                        |
| Akirin2       | 1.62                              | 0.70                                 | 1.7E-04 | 8.9E-06 | 433693      | akirin 2                                                                                        |
| Alas1         | 0.63                              | -0.68                                | 3.8E-05 | 1.6E-06 | 11655       | aminolevulinic acid synthase 1                                                                  |
| Aldh1a1       | 5.32                              | 2.41                                 | 2.4E-36 | 1.6E-39 | 11668       | aldehyde dehydrogenase family 1, subfamily A1                                                   |
| Aldh1b1       | 17.89                             | 4.16                                 | 5.0E-46 | 1.5E-49 | 72535       | aldehyde dehydrogenase 1 family, member B1                                                      |
| Aldh4a1       | 0.60                              | -0.75                                | 8.6E-06 | 2.8E-07 | 212647      | aldehyde dehydrogenase 4 family, member A1                                                      |
| Aldh6a1       | 0.53                              | -0.91                                | 3.5E-06 | 1.0E-07 | 104776      | aldehyde dehydrogenase family 6, subfamily A1                                                   |
| Aldoa1        | 0.59                              | -0.77                                | 1.2E-04 | 6.3E-06 | 353204      | aldolase 1 A retrogene 1                                                                        |
| Alg10b        | 0.51                              | -0.97                                | 6.7E-08 | 1.1E-09 | 380959      | asparagine-linked glycosylation 10B (alpha-1,2-glycosyltransferase)                             |
| Alkbb8        | 0.51                              | -0.97                                | 2.4E-06 | 6.5E-08 | 67667       | alkB, alkylation repair homolog 8 (E. coli)                                                     |
| Alox5ap       | 2.13                              | 1.09                                 | 5.7E-06 | 1.7E-07 | 11690       | arachidonate 5-lipoxygenase activating protein                                                  |
| Aix4          | 11.93                             | 3.58                                 | 7.4E-21 | 1.5E-23 | 11695       | aristaeless-like homeobox 4                                                                     |
| Amhr2         | 3.16                              | 1.66                                 | 6.2E-08 | 1.1E-09 | 110542      | anti-Mullerian hormone type 2 receptor                                                          |
| Amigo3        | 0.28                              | -1.82                                | 1.2E-15 | 4.6E-18 | 320844      | adhesion molecule with Ig like domain 3                                                         |
| Amot          | 1.58                              | 0.66                                 | 9.2E-06 | 3.1E-07 | 27494       | angiominin                                                                                      |
| Ankhd1        | 0.57                              | -0.81                                | 2.1E-05 | 8.1E-07 | 108857      | ankyrin repeat and KH domain containing 1                                                       |
| Ankrd1        | 14.19                             | 3.83                                 | 9.6E-36 | 6.6E-39 | 107765      | ankyrin repeat domain 1 (cardiac muscle)                                                        |
| Ankrd23       | 0.45                              | -1.14                                | 1.4E-04 | 7.2E-06 | 78321       | ankyrin repeat domain 23                                                                        |
| Ankrd27       | 1.92                              | 0.94                                 | 3.7E-07 | 7.6E-09 | 245886      | ankyrin repeat domain 27 (VPS9 domain)                                                          |
| Ankrd6        | 2.16                              | 1.11                                 | 1.6E-06 | 4.2E-08 | 140577      | ankyrin repeat domain 6                                                                         |
| Ano4          | 2.41                              | 1.27                                 | 3.8E-05 | 1.6E-06 | 320091      | anoctamin 4                                                                                     |
| Ano5          | 0.52                              | -0.95                                | 2.6E-07 | 5.1E-09 | 233246      | anoctamin 5                                                                                     |
| Anpep         | 2.01                              | 1.01                                 | 3.1E-05 | 1.2E-06 | 16790       | alanil (membrane) aminopeptidase                                                                |
| Anxa1         | 2.38                              | 1.25                                 | 1.5E-09 | 1.7E-11 | 16952       | annexin A1                                                                                      |
| Anxa2         | 1.69                              | 0.75                                 | 1.4E-04 | 7.1E-06 | 12306       | annexin A2                                                                                      |
| Anxa4         | 2.68                              | 1.42                                 | 4.4E-08 | 7.0E-10 | 11746       | annexin A4                                                                                      |
| Anxa7         | 2.56                              | 1.36                                 | 1.2E-07 | 2.2E-09 | 11750       | annexin A7                                                                                      |
| Anxa8         | 55.46                             | 5.79                                 | 2.6E-17 | 8.0E-20 | 11752       | annexin A8                                                                                      |
| Aoc3          | 1.71                              | 0.77                                 | 1.1E-04 | 5.6E-06 | 11754       | amine oxidase, copper containing 3                                                              |
| Ap1s1         | 1.65                              | 0.73                                 | 1.1E-04 | 5.7E-06 | 11769       | adaptor protein complex AP-1, sigma 1                                                           |
| Apod          | 2.15                              | 1.10                                 | 5.8E-06 | 1.8E-07 | 11815       | apolipoprotein D                                                                                |
| Arfgap3       | 2.29                              | 1.19                                 | 4.4E-06 | 1.3E-07 | 66251       | ADP-ribosylation factor GTPase activating protein 3                                             |
| Arhgap24      | 1.77                              | 0.82                                 | 6.2E-06 | 1.9E-07 | 231532      | Rho GTPase activating protein 24                                                                |
| Arhgap33      | 2.79                              | 1.48                                 | 1.4E-05 | 5.1E-07 | 233071      | Rho GTPase activating protein 33                                                                |
| Arhgap36      | 71.47                             | 6.16                                 | 2.1E-42 | 8.2E-46 | 75404       | Rho GTPase activating protein 36                                                                |
| Arhgap44      | 1.96                              | 0.97                                 | 8.2E-05 | 3.9E-06 | 216831      | Rho GTPase activating protein 44                                                                |
| Arhgap5       | 0.52                              | -0.95                                | 3.4E-05 | 1.4E-06 | 11855       | Rho GTPase activating protein 5                                                                 |
| Arhgap5       | 6.54                              | 2.71                                 | 3.8E-25 | 6.0E-28 | 14570       | Rho GDP dissociation inhibitor (GDI) gamma                                                      |
| Arhgef7       | 0.61                              | -0.71                                | 1.0E-05 | 3.4E-07 | 54126       | Rho guanine nucleotide exchange factor (GEF7)                                                   |
| Armcx4        | 0.56                              | -0.83                                | 9.7E-08 | 1.7E-09 | 100503043   | armadillo repeat containing, X-linked 4                                                         |
| Arsg          | 3.21                              | 1.68                                 | 5.6E-08 | 9.4E-10 | 74008       | arylsulfatase G                                                                                 |
| Arx           | 7.44                              | 2.89                                 | 5.6E-15 | 2.3E-17 | 11878       | aristaeless related homeobox                                                                    |
| Asb11         | 0.48                              | -1.05                                | 3.3E-06 | 9.6E-08 | 68854       | ankyrin repeat and SOCS box-containing 11                                                       |
| Asb13         | 0.58                              | -0.78                                | 3.8E-05 | 1.6E-06 | 142688      | ankyrin repeat and SOCS box-containing 13                                                       |

|               |       |       |         |         |        |                                                                                             |
|---------------|-------|-------|---------|---------|--------|---------------------------------------------------------------------------------------------|
| Asb14         | 0.59  | -0.79 | 6.2E-05 | 2.8E-06 | 142687 | ankyrin repeat and SOCS box-containing 14                                                   |
| Asb15         | 0.21  | -2.27 | 2.2E-13 | 1.2E-15 | 78910  | ankyrin repeat and SOCS box-containing 15                                                   |
| Asb16         | 0.57  | -0.81 | 1.8E-05 | 6.8E-07 | 217217 | ankyrin repeat and SOCS box-containing 16                                                   |
| Asic1         | 0.38  | -1.40 | 2.5E-06 | 6.8E-08 | 11419  | acid sensing (proton gated) ion channel 1                                                   |
| Asns          | 3.67  | 1.88  | 1.3E-05 | 4.7E-07 | 27053  | asparagine synthetase                                                                       |
| Astn2         | 4.46  | 2.16  | 1.5E-06 | 3.9E-08 | 56079  | astroactin 2                                                                                |
| Atf3          | 2.56  | 1.36  | 1.3E-04 | 6.7E-06 | 11910  | activating transcription factor 3                                                           |
| Atp13a5       | 2.57  | 1.36  | 2.9E-07 | 6.0E-09 | 268878 | ATPase type 13A5                                                                            |
| Atp1b4        | 17.13 | 4.10  | 2.5E-34 | 1.8E-37 | 67821  | ATPase, (Na <sup>+</sup> )/K <sup>+</sup> transporting, beta 4 polypeptide                  |
| Atp2a1        | 0.55  | -0.86 | 3.7E-06 | 1.1E-07 | 11937  | ATPase, Ca <sup>++</sup> transporting, cardiac muscle, fast twitch 1                        |
| Atp2a2        | 2.54  | 1.35  | 1.1E-06 | 2.7E-08 | 11938  | ATPase, Ca <sup>++</sup> transporting, cardiac muscle, slow twitch 2                        |
| Atp5a1        | 0.62  | -0.68 | 4.8E-05 | 2.1E-06 | 11946  | ATP synthase, H <sup>+</sup> transporting, mitochondrial F1 complex, alpha subunit 1        |
| Atp6v0e       | 1.82  | 0.86  | 2.3E-07 | 4.6E-09 | 11974  | ATPase, H <sup>+</sup> transporting, lysosomal V0 subunit E                                 |
| Atp9a         | 1.84  | 0.88  | 1.1E-04 | 5.8E-06 | 11981  | ATPase, class II, type 9A                                                                   |
| Atrn1         | 1.77  | 0.83  | 9.7E-05 | 4.8E-06 | 226255 | attractin like 1                                                                            |
| AU021092      | 2.47  | 1.30  | 4.2E-05 | 1.8E-06 | 239691 | expressed sequence AU021092                                                                 |
| Avp1          | 2.03  | 1.02  | 3.7E-07 | 7.7E-09 | 69534  | arginine vasopressin-induced 1                                                              |
| Axl           | 1.93  | 0.95  | 1.1E-06 | 2.7E-08 | 26362  | AXL receptor tyrosine kinase                                                                |
| B3galt2       | 3.04  | 1.60  | 2.3E-14 | 1.1E-16 | 26878  | UDP-Gal:betaGalNAc beta 1,3-galactosyltransferase, polypeptide 2                            |
| B3gnt1        | 1.76  | 0.81  | 2.6E-05 | 1.0E-06 | 53625  | UDP-GlcNAc:betaGal beta 1,3-N-acetylglucosaminyltransferase 2                               |
| B4galnt1      | 2.36  | 1.24  | 1.6E-04 | 8.3E-06 | 14421  | beta-1,4-N-acetyl-galactosaminyl transferase I                                              |
| B4gal16       | 3.40  | 1.77  | 6.2E-08 | 1.0E-09 | 56386  | UDP-Gal:betaGlcNAc beta 1,4-galactosyltransferase, polypeptide 6                            |
| B930041F14Rik | 3.53  | 1.82  | 3.1E-07 | 6.4E-09 | 230991 | RIKEN cDNA B930041F14 gene                                                                  |
| Baiaap211     | 4.07  | 2.03  | 2.0E-09 | 2.3E-11 | 66898  | BAII-associated protein 2-like 1                                                            |
| Barx2         | 0.36  | -1.46 | 3.3E-06 | 9.6E-08 | 12023  | BarH-like homeobox 2                                                                        |
| Bbs5          | 2.14  | 1.10  | 1.2E-04 | 6.2E-06 | 72569  | Bardet-Biedl syndrome 5                                                                     |
| Bbx           | 0.57  | -0.80 | 7.2E-05 | 3.3E-06 | 70508  | bobby sox homolog                                                                           |
| BC049352      | 6.78  | 2.76  | 4.7E-09 | 5.9E-11 | 408059 | cDNA sequence BC049352                                                                      |
| Beam          | 1.57  | 0.65  | 1.1E-04 | 5.6E-06 | 57278  | basal cell adhesion molecule                                                                |
| Beas1         | 2.55  | 1.35  | 6.1E-06 | 1.9E-07 | 76960  | breast carcinoma amplified sequence 1                                                       |
| Bdnf          | 4.22  | 2.08  | 2.5E-11 | 2.0E-13 | 12064  | brain derived neurotrophic factor                                                           |
| Bect1         | 3.74  | 1.90  | 2.3E-09 | 2.7E-11 | 19716  | brain expressed gene 1                                                                      |
| Bin1          | 1.58  | 0.66  | 9.3E-05 | 4.5E-06 | 30948  | bridging integrator 1                                                                       |
| Birc6         | 0.63  | -0.67 | 1.2E-04 | 6.1E-06 | 12211  | herpesviral IAP repeat-containing 6                                                         |
| Bloc1s6       | 2.09  | 1.07  | 8.6E-09 | 1.1E-10 | 18457  | biogenesis of organelles complex-1, subunit 6, pallidin                                     |
| Brlk1         | 1.65  | 0.72  | 9.6E-06 | 3.2E-07 | 101314 | BRICK1, SCAR/WAVE actin-nucleating complex subunit                                          |
| Clgal1        | 0.49  | -1.03 | 1.3E-04 | 6.9E-06 | 94192  | core 1 synthase, glycoprotein-N-acetylgalactosamine 3-beta-galactosyltransferase, 1         |
| C3            | 2.09  | 1.06  | 1.8E-05 | 6.5E-07 | 12266  | complement component 3                                                                      |
| C530008M17Rik | 2.29  | 1.19  | 3.5E-07 | 7.3E-09 | 320827 | RIKEN cDNA C530008M17 gene                                                                  |
| Cacna1g       | 2.03  | 1.02  | 1.8E-04 | 9.8E-06 | 12291  | calcium channel, voltage-dependent, T type, alpha 1G subunit                                |
| Cacna1s       | 0.58  | -0.79 | 4.7E-08 | 7.7E-10 | 12292  | calcium channel, voltage-dependent, L type, alpha 1S subunit                                |
| Cacna2d3      | 5.95  | 2.57  | 5.5E-10 | 5.7E-12 | 12294  | calcium channel, voltage-dependent, alpha2/delta subunit 3                                  |
| Cadm3         | 2.24  | 1.17  | 1.5E-05 | 5.2E-07 | 94332  | cell adhesion molecule 3                                                                    |
| Calcr         | 0.06  | -4.09 | 8.5E-11 | 7.5E-13 | 12311  | calcitonin receptor                                                                         |
| Camk2a        | 0.59  | -0.75 | 5.0E-05 | 2.2E-06 | 12322  | calcium/calmodulin-dependent protein kinase II alpha                                        |
| Camk2d        | 1.64  | 0.71  | 4.6E-05 | 2.0E-06 | 108058 | calcium/calmodulin-dependent protein kinase II, delta                                       |
| Camk2g        | 0.59  | -0.75 | 3.1E-05 | 1.3E-06 | 12325  | calcium/calmodulin-dependent protein kinase II gamma                                        |
| Camk2n2       | 2.79  | 1.48  | 7.8E-05 | 3.6E-06 | 73047  | calcium/calmodulin-dependent protein kinase II inhibitor 2                                  |
| Capg          | 1.70  | 0.77  | 9.0E-05 | 4.3E-06 | 12332  | capping protein (actin filament), gelsolin-like                                             |
| Capn3         | 0.43  | -1.22 | 2.2E-10 | 2.1E-12 | 12335  | calpain 3                                                                                   |
| Car3          | 0.54  | -0.90 | 1.1E-05 | 3.6E-07 | 12350  | carbonic anhydrase 3                                                                        |
| Casq2         | 2.64  | 1.40  | 1.7E-10 | 1.6E-12 | 12373  | calsequestrin 2                                                                             |
| Casx1         | 0.53  | -0.92 | 8.4E-06 | 2.7E-07 | 69743  | castor zinc finger 1                                                                        |
| Cbfb          | 0.56  | -0.84 | 1.3E-04 | 6.6E-06 | 12400  | core binding factor beta                                                                    |
| Ccbl1         | 0.51  | -0.97 | 8.8E-08 | 1.5E-09 | 70266  | cysteine conjugate-beta lyase 1                                                             |
| Ccdc110       | 19.79 | 4.31  | 4.7E-09 | 5.9E-11 | 212392 | coiled-coil domain containing 110                                                           |
| Ccdc122       | 3.24  | 1.70  | 7.3E-06 | 2.3E-07 | 108811 | coiled-coil domain containing 122                                                           |
| Ccdc127       | 0.62  | -0.69 | 6.4E-05 | 2.9E-06 | 67433  | coiled-coil domain containing 127                                                           |
| Ccdc136       | 3.61  | 1.85  | 3.0E-08 | 4.4E-10 | 232664 | coiled-coil domain containing 136                                                           |
| Ccdc186       | 0.48  | -1.07 | 2.4E-05 | 9.3E-07 | 213993 | coiled-coil domain containing 186                                                           |
| Ccl6          | 2.38  | 1.25  | 1.7E-04 | 9.3E-06 | 20305  | chemokine (C-C motif) ligand 6                                                              |
| Cendb1        | 2.30  | 1.20  | 8.0E-09 | 1.0E-10 | 17151  | cyclin D-type binding-protein 1                                                             |
| Cd151         | 1.62  | 0.70  | 1.5E-04 | 8.1E-06 | 12476  | CD151 antigen                                                                               |
| Cd24a         | 3.33  | 1.74  | 1.2E-16 | 4.0E-19 | 12484  | CD24a antigen                                                                               |
| Cd276         | 2.19  | 1.13  | 2.0E-08 | 2.7E-10 | 102657 | CD276 antigen                                                                               |
| Cd9           | 1.80  | 0.85  | 3.2E-06 | 9.0E-08 | 12527  | CD9 antigen                                                                                 |
| Cdc42ep3      | 0.66  | -0.59 | 1.2E-04 | 6.0E-06 | 260409 | CDC42 effector protein (Rho GTPase binding) 3                                               |
| Cdkn1a        | 5.33  | 2.41  | 1.8E-08 | 2.5E-10 | 12575  | cyclin-dependent kinase inhibitor 1A (P21)                                                  |
| Cdkn1b        | 0.59  | -0.75 | 1.9E-06 | 4.9E-08 | 12576  | cyclin-dependent kinase inhibitor 1B                                                        |
| Cdo1          | 7.50  | 2.91  | 4.2E-13 | 2.4E-15 | 12583  | cysteine dioxygenase 1, cytosolic                                                           |
| Cebpalpha     | 3.36  | 1.75  | 1.2E-08 | 1.6E-10 | 12606  | CCAAT/enhancer binding protein (C/EBP), alpha                                               |
| Cecr2         | 0.55  | -0.86 | 2.9E-05 | 1.1E-06 | 330409 | cat eye syndrome chromosome region, candidate 2                                             |
| Cecram        | 2.04  | 1.03  | 1.4E-04 | 7.5E-06 | 99151  | cerebral endothelial cell adhesion molecule                                                 |
| Ces1d         | 5.34  | 2.42  | 3.6E-08 | 5.6E-10 | 104158 | carboxylesterase 1D                                                                         |
| Cfd           | 6.58  | 2.72  | 9.5E-18 | 2.7E-20 | 11537  | complement factor D (adipsin)                                                               |
| Cgref1        | 5.60  | 2.48  | 6.0E-07 | 1.3E-08 | 68567  | cell growth regulator with EF hand domain 1                                                 |
| Chd2          | 0.58  | -0.80 | 5.3E-05 | 2.3E-06 | 244059 | chromodomain helicase DNA binding protein 2                                                 |
| Chd9          | 0.61  | -0.72 | 1.5E-04 | 8.2E-06 | 109151 | chromodomain helicase DNA binding protein 9                                                 |
| Chdh          | 5.45  | 2.45  | 2.4E-10 | 2.3E-12 | 218865 | choline dehydrogenase                                                                       |
| Chm           | 0.50  | -1.00 | 1.2E-06 | 3.0E-08 | 12662  | choroideremia                                                                               |
| Chrna1        | 3.95  | 1.98  | 1.9E-07 | 3.6E-09 | 11435  | cholinergic receptor, nicotinic, alpha polypeptide 1 (muscle)                               |
| Chrnd         | 8.33  | 3.06  | 7.0E-11 | 6.0E-13 | 11447  | cholinergic receptor, nicotinic, delta polypeptide                                          |
| Chrnc         | 2.07  | 1.05  | 1.2E-12 | 7.5E-15 | 11448  | cholinergic receptor, nicotinic, epsilon polypeptide                                        |
| Chrng         | 51.81 | 5.70  | 6.5E-12 | 4.5E-14 | 11449  | cholinergic receptor, nicotinic, gamma polypeptide                                          |
| Cidea         | 5.62  | 2.49  | 1.2E-20 | 2.5E-23 | 12683  | cell death-inducing DNA fragmentation factor, alpha subunit-like effector A                 |
| Cidec         | 8.09  | 3.02  | 1.8E-11 | 1.3E-13 | 14311  | cell death-inducing DFFA-like effector c                                                    |
| Cilp          | 7.38  | 2.88  | 3.4E-44 | 1.2E-47 | 214425 | cartilage intermediate layer protein, nucleotide pyrophosphohydrolase                       |
| Cilp2         | 2.98  | 1.57  | 2.4E-07 | 4.8E-09 | 68709  | cartilage intermediate layer protein 2                                                      |
| Ckap4         | 1.80  | 0.85  | 1.6E-04 | 8.6E-06 | 216197 | cytoskeleton-associated protein 4                                                           |
| Ckb           | 1.96  | 0.97  | 9.0E-05 | 4.3E-06 | 12709  | creatine kinase, brain                                                                      |
| Clen1         | 0.44  | -1.19 | 2.1E-09 | 2.4E-11 | 12723  | chloride channel 1                                                                          |
| Cldn12        | 0.56  | -0.83 | 1.6E-06 | 4.0E-08 | 64945  | claudin 12                                                                                  |
| Cldn19        | 2.93  | 1.55  | 2.2E-09 | 2.6E-11 | 242653 | claudin 19                                                                                  |
| Cluh          | 0.62  | -0.70 | 1.5E-05 | 5.2E-07 | 74148  | clustered mitochondria (cluA/CLU1) homolog                                                  |
| Cms1          | 0.40  | -1.33 | 8.8E-09 | 1.2E-10 | 66497  | cms small ribosomal subunit 1                                                               |
| Cmya5         | 0.42  | -1.25 | 2.8E-12 | 1.8E-14 | 76469  | cardiomyopathy associated 5                                                                 |
| Cnksr1        | 1.99  | 1.00  | 1.9E-07 | 3.7E-09 | 194231 | connector enhancer of kinase suppressor of Ras 1                                            |
| Cnm4          | 0.52  | -0.95 | 1.9E-06 | 5.0E-08 | 94220  | cyclin M4                                                                                   |
| Cnot1         | 0.62  | -0.69 | 1.9E-05 | 7.2E-07 | 234594 | CCR4-NOT transcription complex, subunit 1                                                   |
| Cnp           | 1.99  | 1.00  | 1.2E-05 | 4.1E-07 | 12799  | 2',3'-cyclic nucleotide 3' phosphodiesterase                                                |
| Cntnap4       | 87.33 | 6.45  | 7.2E-30 | 8.7E-33 | 170571 | contactin associated protein-like 4                                                         |
| Col19a1       | 3.73  | 1.90  | 5.9E-07 | 1.3E-08 | 12823  | collagen, type XIX, alpha 1                                                                 |
| Col22a1       | 1.93  | 0.95  | 2.5E-06 | 6.9E-08 | 69700  | collagen, type XXII, alpha 1                                                                |
| Col23a1       | 3.83  | 1.94  | 1.1E-09 | 1.2E-11 | 237759 | collagen, type XXIII, alpha 1                                                               |
| Col6a6        | 0.31  | -1.70 | 7.2E-05 | 3.3E-06 | 245026 | collagen, type VI, alpha 6                                                                  |
| Col7a1        | 2.64  | 1.40  | 1.8E-06 | 4.7E-08 | 12836  | collagen, type VII, alpha 1                                                                 |
| Col8a2        | 3.66  | 1.87  | 3.8E-06 | 1.1E-07 | 329941 | collagen, type VIII, alpha 2                                                                |
| Colq          | 3.39  | 1.76  | 1.3E-08 | 1.7E-10 | 382864 | collagen-like tail subunit (single strand of homotrimer) of asymmetric acetylcholinesterase |
| Coprs         | 2.14  | 1.10  | 9.4E-08 | 1.7E-09 | 66423  | coordinator of PRMT5, differentiation stimulator                                            |
| Cox19         | 1.54  | 0.62  | 9.6E-05 | 4.7E-06 | 68033  | COX19 cytochrome c oxidase assembly homolog                                                 |
| Cox8a         | 1.80  | 0.85  | 3.8E-05 | 1.6E-06 | 12868  | cytochrome c oxidase, subunit VIIIa                                                         |
| Cpeb2         | 2.60  | 1.38  | 4.2E-15 | 1.7E-17 | 231207 | cytoplasmic polyadenylation element binding protein 2                                       |
| Cpne2         | 8.23  | 3.04  | 7.3E-24 | 1.3E-26 | 234577 | copine II                                                                                   |
| Cpox          | 0.58  | -0.78 | 5.5E-06 | 1.7E-07 | 12892  | coproporphyrinogen oxidase                                                                  |
| Creb1         | 0.63  | -0.66 | 1.4E-04 | 7.2E-06 | 12912  | cAMP responsive element binding protein 1                                                   |
| Crip1         | 1.84  | 0.88  | 2.4E-06 | 6.5E-08 | 12925  | cysteine-rich protein 1 (intestinal)                                                        |
| Crf2          | 3.02  | 1.59  | 1.0E-07 | 1.8E-09 | 57914  | cytokine receptor-like factor 2                                                             |
| Cryab         | 1.97  | 0.98  | 6.1E-06 | 1.9E-07 | 12955  | crystallin, alpha B                                                                         |
| Crym          | 2.18  | 1.13  | 2.8E-07 | 5.6E-09 | 12971  | crystallin, mu                                                                              |
| Cs            | 0.66  | -0.60 | 9.5E-05 | 4.6E-06 | 12974  | citrate synthase                                                                            |
| Csde2         | 3.52  | 1.81  | 2.7E-09 | 3.3E-11 | 105859 | cold shock domain containing C2, RNA binding                                                |
| Csl           | 0.54  | -0.90 | 1.2E-07 | 2.2E-09 | 71832  | citrate synthase like                                                                       |
| Csrp3         | 4.02  | 2.01  | 5.6E-05 | 2.5E-06 | 13009  | cysteine and glycine-rich protein 3                                                         |

|               |       |       |         |         |           |                                                                                                        |
|---------------|-------|-------|---------|---------|-----------|--------------------------------------------------------------------------------------------------------|
| Cst6          | 2.78  | 1.48  | 9.9E-13 | 5.9E-15 | 73720     | cystatin E/M                                                                                           |
| Ctdspl        | 1.95  | 0.96  | 6.1E-06 | 1.9E-07 | 69274     | CTD (carboxy-terminal domain, RNA polymerase II, polypeptide A) small phosphatase-like                 |
| Ctgf          | 2.78  | 1.47  | 9.1E-07 | 2.2E-08 | 14219     | connective tissue growth factor                                                                        |
| Ctnna3        | 2.46  | 1.30  | 1.0E-07 | 1.9E-09 | 216033    | catenin (cadherin associated protein), alpha 3                                                         |
| Ctss          | 2.81  | 1.49  | 9.9E-05 | 4.9E-06 | 13040     | cathepsin S                                                                                            |
| Cttna3        | 0.33  | -1.62 | 6.3E-12 | 4.3E-14 | 629147    | cortixin 3                                                                                             |
| Cul7          | 2.08  | 1.05  | 1.4E-05 | 4.8E-07 | 66515     | cullin 7                                                                                               |
| Cux1          | 0.63  | -0.68 | 1.9E-05 | 7.1E-07 | 13047     | cut-like homeobox 1                                                                                    |
| Cxcl14        | 0.33  | -1.59 | 1.5E-05 | 5.6E-07 | 57266     | chemokine (C-X-C motif) ligand 14                                                                      |
| Cxcr4         | 0.43  | -1.23 | 1.5E-04 | 8.0E-06 | 12767     | chemokine (C-X-C motif) receptor 4                                                                     |
| Cyb5r3        | 2.42  | 1.27  | 3.6E-06 | 1.0E-07 | 109754    | cytochrome b5 reductase 3                                                                              |
| Cyfp2         | 3.88  | 1.96  | 7.3E-14 | 3.8E-16 | 76884     | cytoplasmic FMRI interacting protein 2                                                                 |
| Cyp2e1        | 9.35  | 3.92  | 7.0E-08 | 1.2E-09 | 13106     | cytochrome P450, family 2, subfamily e, polypeptide 1                                                  |
| D830015G02Rik | 15.16 | 3.92  | 7.4E-08 | 1.3E-09 | 791403    | RIKEN cDNA D830015G02 gene                                                                             |
| Dact3         | 2.27  | 1.18  | 1.5E-04 | 7.9E-06 | 629378    | dapper homolog 3, antagonist of beta-catenin                                                           |
| Dapk1         | 2.10  | 1.07  | 2.2E-05 | 8.3E-07 | 69635     | death associated protein kinase 1                                                                      |
| Dapk2         | 1.74  | 0.80  | 7.4E-05 | 3.4E-06 | 13143     | death-associated protein kinase 2                                                                      |
| Dbn1          | 1.93  | 0.95  | 3.9E-05 | 1.6E-06 | 56320     | drebrin 1                                                                                              |
| Deaf1         | 0.60  | -0.73 | 1.2E-05 | 4.3E-07 | 28199     | DDBI and CUL4 associated factor 11                                                                     |
| Deaf1211      | 6.41  | 2.68  | 8.0E-18 | 2.2E-20 | 245404    | DDBI and CUL4 associated factor 12-like 1                                                              |
| Delk1         | 4.96  | 2.31  | 1.2E-04 | 5.9E-06 | 13175     | doublecortin-like kinase 1                                                                             |
| Deun1d2       | 0.62  | -0.69 | 1.7E-04 | 8.9E-06 | 102323    | DCN1, defective in cullin neddylation 1, domain containing 2                                           |
| Ddah2         | 1.69  | 0.75  | 1.0E-04 | 5.2E-06 | 51793     | dimethylarginine dimethylaminohydrolase 2                                                              |
| Ddhd1         | 1.86  | 0.89  | 6.2E-05 | 2.8E-06 | 114874    | DDHD domain containing 1                                                                               |
| Ddit4l        | 0.41  | -1.29 | 6.9E-08 | 1.2E-09 | 73284     | DNA-damage-inducible transcript 4-like                                                                 |
| Dennd4b       | 0.63  | -0.67 | 1.0E-04 | 5.1E-06 | 229541    | DENN/MADD domain containing 4B                                                                         |
| Dennd4c       | 0.35  | -1.52 | 6.6E-07 | 1.5E-08 | 329877    | DENN/MADD domain containing 4C                                                                         |
| Des           | 1.99  | 1.00  | 7.2E-09 | 9.2E-11 | 13946     | desmin                                                                                                 |
| Dfna5         | 4.64  | 2.21  | 2.7E-07 | 5.4E-09 | 54722     | deafness, autosomal dominant 5                                                                         |
| Dhcr24        | 2.00  | 1.00  | 1.3E-04 | 6.6E-06 | 74754     | 24-dehydrocholesterol reductase                                                                        |
| Dhrs3         | 1.80  | 0.85  | 5.4E-05 | 2.4E-06 | 20148     | dehydrogenase/reductase (SDR family) member 3                                                          |
| Dhrs7         | 2.22  | 1.15  | 2.3E-08 | 3.3E-10 | 66375     | dehydrogenase/reductase (SDR family) member 7                                                          |
| Dixd1c1       | 0.53  | -0.92 | 1.1E-04 | 5.7E-06 | 330938    | DIX domain containing 1                                                                                |
| Dlg5          | 1.74  | 0.80  | 1.5E-04 | 7.7E-06 | 71228     | discs, large homolog 5                                                                                 |
| Dlk1          | 8.79  | 3.14  | 6.4E-41 | 2.9E-44 | 13386     | delta-like 1 homolog                                                                                   |
| Dnajb5        | 0.55  | -0.85 | 6.7E-06 | 2.1E-07 | 56323     | DnaJ (Hsp40) homolog, subfamily B, member 5                                                            |
| Dnase1ll      | 0.60  | -0.73 | 1.2E-04 | 6.1E-06 | 69537     | deoxyribonuclease 1-like 1                                                                             |
| Dam1          | 1.96  | 0.97  | 5.7E-06 | 1.7E-07 | 13429     | dynamitin 1                                                                                            |
| Daph1         | 0.43  | -1.23 | 6.6E-06 | 2.1E-07 | 381101    | 2'-deoxynucleoside 5'-phosphate N-hydrolase 1                                                          |
| Dok1          | 2.11  | 1.08  | 3.2E-05 | 1.3E-06 | 13448     | docking protein 1                                                                                      |
| Dpf3          | 0.54  | -0.90 | 2.6E-05 | 1.0E-06 | 70127     | D4, zinc and double PHD fingers, family 3                                                              |
| Dpp8          | 0.61  | -0.70 | 7.1E-06 | 2.2E-07 | 74388     | dipeptidylpeptidase 8                                                                                  |
| Dram1         | 2.77  | 1.47  | 7.7E-06 | 2.5E-07 | 71712     | DNA-damage regulated autophagy modulator 1                                                             |
| Drp2          | 2.14  | 1.10  | 6.3E-05 | 2.8E-06 | 13497     | dystrophin related protein 2                                                                           |
| Dst           | 0.56  | -0.85 | 5.4E-05 | 2.3E-06 | 13518     | dystonin                                                                                               |
| Dtx4          | 0.58  | -0.78 | 1.1E-05 | 3.9E-07 | 207521    | deltex 4 homolog                                                                                       |
| Dusp13        | 0.59  | -0.76 | 1.1E-05 | 3.6E-07 | 27389     | dual specificity phosphatase 13                                                                        |
| Dusp15        | 4.17  | 2.06  | 6.2E-08 | 1.0E-09 | 252864    | dual specificity phosphatase-like 15                                                                   |
| E030003E18Rik | 4.40  | 2.14  | 4.3E-31 | 4.4E-34 | 320092    | RIKEN cDNA E030003E18 gene                                                                             |
| Ecd           | 0.65  | -0.61 | 1.2E-04 | 5.9E-06 | 70601     | ecdysoneless homolog                                                                                   |
| Ecm1          | 2.19  | 1.13  | 5.3E-06 | 1.6E-07 | 13601     | extracellular matrix protein 1                                                                         |
| Eda2r         | 5.38  | 2.43  | 1.0E-14 | 4.6E-17 | 245527    | ectodysplasin A2 receptor                                                                              |
| Egf           | 1.65  | 0.72  | 9.0E-05 | 4.3E-06 | 13645     | epidermal growth factor                                                                                |
| Egflam        | 0.48  | -1.05 | 2.7E-08 | 3.9E-10 | 268780    | EGF-like, fibronectin type III and laminin G domains                                                   |
| Egln3         | 5.79  | 2.53  | 4.0E-11 | 3.3E-13 | 112407    | EGL nine homolog 3                                                                                     |
| Egr1          | 5.42  | 2.44  | 1.0E-04 | 5.2E-06 | 13653     | early growth response 1                                                                                |
| Egr2          | 4.19  | 2.07  | 3.1E-06 | 8.8E-08 | 13654     | early growth response 2                                                                                |
| Ehd3          | 4.43  | 2.15  | 3.8E-26 | 5.7E-29 | 57440     | EH-domain containing 3                                                                                 |
| Ehd4          | 2.41  | 1.27  | 2.3E-07 | 4.5E-09 | 98878     | EH-domain containing 4                                                                                 |
| Eid1          | 1.99  | 1.00  | 1.3E-08 | 1.8E-10 | 58521     | EP300 interacting inhibitor of differentiation 1                                                       |
| Eln           | 1.78  | 0.83  | 2.4E-06 | 6.5E-08 | 13717     | elastin                                                                                                |
| Elov1l        | 2.02  | 1.01  | 1.5E-05 | 5.5E-07 | 54325     | elongation of very long chain fatty acids (FEN1/Elo2, SUR4/Elo3, yeast)-like 1                         |
| Emb           | 5.84  | 2.55  | 1.3E-14 | 6.2E-17 | 13723     | embigin                                                                                                |
| Emp2          | 1.68  | 0.75  | 8.5E-05 | 4.0E-06 | 13731     | epithelial membrane protein 2                                                                          |
| Enah          | 1.88  | 0.91  | 8.7E-07 | 2.1E-08 | 13800     | enabled homolog                                                                                        |
| Engase        | 1.96  | 0.97  | 8.0E-05 | 3.7E-06 | 217364    | endo-beta-N-acetylglucosaminidase                                                                      |
| Enho          | 3.12  | 1.64  | 1.9E-11 | 1.4E-13 | 69638     | energy homeostasis associated                                                                          |
| Enkur         | 4.67  | 2.22  | 3.5E-08 | 5.4E-10 | 71233     | enkurin, TRPC channel interacting protein                                                              |
| Epb4.1        | 0.61  | -0.71 | 1.2E-04 | 6.4E-06 | 269587    | erythrocyte protein band 4.1                                                                           |
| Epb4.1l4a     | 2.28  | 1.19  | 5.2E-05 | 2.2E-06 | 13824     | erythrocyte protein band 4.1-like 4a                                                                   |
| Epg5          | 0.56  | -0.85 | 5.8E-05 | 2.6E-06 | 100502841 | ectopic P-granules autophagy protein 5 homolog                                                         |
| Ephb3         | 3.45  | 1.79  | 1.1E-04 | 5.5E-06 | 13845     | Eph receptor B3                                                                                        |
| Ephb6         | 3.45  | 1.79  | 6.5E-12 | 4.5E-14 | 13848     | Eph receptor B6                                                                                        |
| Epm2aip1      | 0.52  | -0.94 | 4.9E-06 | 1.5E-07 | 77781     | EPM2A (laforin) interacting protein 1                                                                  |
| Erbp2         | 2.10  | 1.07  | 1.2E-05 | 4.2E-07 | 13866     | v-erb-b2 erythroblastic leukemia viral oncogene homolog 2, neuro/glioblastoma derived oncogene homolog |
| Esr1          | 0.18  | -1.85 | 2.5E-07 | 4.9E-09 | 13982     | estrogen receptor 1 (alpha)                                                                            |
| Etv5          | 2.36  | 1.24  | 4.8E-08 | 7.9E-10 | 104156    | ets variant gene 5                                                                                     |
| Fa2h          | 4.14  | 2.05  | 1.3E-09 | 1.4E-11 | 338521    | fatty acid 2-hydroxylase                                                                               |
| Fam110a       | 2.98  | 1.58  | 3.0E-11 | 2.4E-13 | 73847     | family with sequence similarity 110, member A                                                          |
| Fam124a       | 3.21  | 1.68  | 5.3E-09 | 6.8E-11 | 629059    | family with sequence similarity 124, member A                                                          |
| Fam171a2      | 3.44  | 1.78  | 1.1E-04 | 5.7E-06 | 217219    | family with sequence similarity 171, member A2                                                         |
| Fam171b       | 14.32 | 3.84  | 8.1E-33 | 7.2E-36 | 241520    | family with sequence similarity 171, member B                                                          |
| Fam178b       | 3.24  | 1.70  | 3.3E-05 | 1.3E-06 | 381337    | family with sequence similarity 178, member B                                                          |
| Fam210a       | 0.54  | -0.89 | 3.2E-05 | 1.3E-06 | 108654    | family with sequence similarity 210, member A                                                          |
| Fam214b       | 1.93  | 0.95  | 2.0E-08 | 2.8E-10 | 230088    | family with sequence similarity 214, member B                                                          |
| Fam46a        | 2.12  | 1.08  | 1.4E-07 | 2.7E-09 | 212943    | family with sequence similarity 46, member A                                                           |
| Fam65b        | 3.45  | 1.79  | 9.0E-07 | 2.1E-08 | 193385    | family with sequence similarity 65, member B                                                           |
| Fam78a        | 0.40  | -1.33 | 4.8E-09 | 6.0E-11 | 241303    | family with sequence similarity 78, member A                                                           |
| Fam81a        | 9.60  | 3.26  | 7.3E-19 | 1.7E-21 | 76886     | family with sequence similarity 81, member A                                                           |
| Fam83b        | 7.15  | 2.84  | 2.3E-09 | 2.7E-11 | 105732    | family with sequence similarity 83, member B                                                           |
| Fan1          | 0.49  | -1.04 | 8.2E-06 | 2.7E-07 | 330554    | FANCD2/FANCI-associated nuclease 1                                                                     |
| Fat1          | 2.17  | 1.12  | 9.2E-06 | 3.1E-07 | 14107     | FAT tumor suppressor homolog 1                                                                         |
| Fbx14         | 1.87  | 0.91  | 9.8E-09 | 1.3E-10 | 269514    | F-box and leucine-rich repeat protein 4                                                                |
| Fbxo17        | 2.65  | 1.41  | 5.7E-10 | 5.9E-12 | 50760     | F-box protein 17                                                                                       |
| Fbxo3         | 0.61  | -0.71 | 1.3E-05 | 4.4E-07 | 57443     | F-box protein 3                                                                                        |
| Fbxo36        | 4.21  | 2.07  | 1.4E-06 | 3.6E-08 | 66153     | F-box protein 36                                                                                       |
| Fbxo44        | 0.53  | -0.93 | 6.0E-05 | 2.7E-06 | 207215    | F-box protein 40                                                                                       |
| Fch           | 1.76  | 0.82  | 1.1E-04 | 5.3E-06 | 230903    | F-box protein 44                                                                                       |
| Fech          | 0.63  | -0.66 | 8.4E-05 | 4.0E-06 | 14151     | ferrochelatase                                                                                         |
| Fert2         | 1.78  | 0.83  | 6.0E-05 | 2.7E-06 | 14158     | fer (fms/fps related) protein kinase, testis specific 2                                                |
| Fez1          | 3.42  | 1.77  | 3.9E-07 | 8.1E-09 | 235180    | fasciculation and elongation protein zeta 1 (zyglin 1)                                                 |
| Fgf5          | 5.70  | 2.51  | 1.6E-07 | 3.0E-09 | 14176     | fibroblast growth factor 5                                                                             |
| Fgf6          | 2.29  | 1.20  | 5.6E-06 | 1.7E-07 | 14177     | fibroblast growth factor 6                                                                             |
| Fgf7          | 3.10  | 1.63  | 3.1E-05 | 1.2E-06 | 14178     | fibroblast growth factor 7                                                                             |
| Fgf9          | 3.22  | 1.69  | 3.9E-06 | 1.1E-07 | 14180     | fibroblast growth factor 9                                                                             |
| Fgfr3         | 2.63  | 1.40  | 1.1E-04 | 5.3E-06 | 14184     | fibroblast growth factor receptor 3                                                                    |
| Fgfr1l        | 3.06  | 1.61  | 1.5E-20 | 3.3E-23 | 116701    | fibroblast growth factor receptor-like 1                                                               |
| Fgf           | 2.26  | 1.18  | 5.6E-05 | 2.4E-06 | 14205     | c-fos induced growth factor                                                                            |
| Fkbp5         | 2.41  | 1.27  | 1.6E-05 | 5.7E-07 | 14229     | FK506 binding protein 5                                                                                |
| Fnde5         | 0.43  | -1.20 | 7.8E-06 | 2.5E-07 | 384061    | fibronectin type III domain containing 5                                                               |
| Foxd3         | 5.29  | 2.40  | 2.2E-08 | 3.2E-10 | 15221     | forkhead box D3                                                                                        |
| Foxo4         | 0.61  | -0.71 | 2.9E-05 | 1.2E-06 | 54601     | forkhead box O4                                                                                        |
| Fras1         | 3.00  | 1.58  | 2.9E-07 | 5.9E-09 | 231470    | Fraser syndrome 1 homolog                                                                              |
| Frem2         | 3.12  | 1.64  | 6.7E-09 | 8.5E-11 | 242022    | Fras1 related extracellular matrix protein 2                                                           |
| Fry           | 0.62  | -0.68 | 1.1E-05 | 3.9E-07 | 320365    | furry homolog                                                                                          |
| Fst           | 3.61  | 1.85  | 5.3E-10 | 5.5E-12 | 14313     | follistatin                                                                                            |
| Fuca2         | 1.69  | 0.76  | 1.4E-05 | 5.1E-07 | 66848     | fucosidase, alpha-L-2, plasma                                                                          |
| Fut8          | 2.09  | 1.07  | 4.6E-08 | 7.4E-10 | 53618     | fucosyltransferase 8                                                                                   |
| Fv1           | 0.34  | -1.58 | 6.6E-06 | 2.1E-07 | 14349     | Friend virus susceptibility 1                                                                          |
| Fyco1         | 0.46  | -1.13 | 1.2E-07 | 2.2E-09 | 17281     | FYVE and coiled-coil domain containing 1                                                               |
| Gabrb2        | 10.63 | 3.41  | 2.9E-16 | 1.0E-18 | 14401     | gamma-aminobutyric acid (GABA) A receptor, subunit beta 2                                              |
| Gabrb3        | 26.90 | 4.75  | 2.5E-17 | 7.3E-20 | 14402     | gamma-aminobutyric acid (GABA) A receptor, subunit beta 3                                              |
| Galk2         | 2.10  | 1.07  | 7.5E-05 | 3.5E-06 | 69976     | galactokinase 2                                                                                        |

|            |       |       |         |         |           |                                                                                                                                       |
|------------|-------|-------|---------|---------|-----------|---------------------------------------------------------------------------------------------------------------------------------------|
| Galm       | 2.80  | 1.49  | 9.6E-06 | 3.2E-07 | 319625    | galactose mutarotase                                                                                                                  |
| Gals       | 3.38  | 1.76  | 2.4E-05 | 9.4E-07 | 50917     | galactosamine (N-acetyl)-6-sulfate sulfatase                                                                                          |
| Ganc       | 0.58  | -0.79 | 5.1E-05 | 2.2E-06 | 76051     | glucosidase, alpha; neutral C                                                                                                         |
| Gas2l1     | 2.24  | 1.16  | 2.0E-05 | 7.3E-07 | 78926     | growth arrest-specific 2 like 1                                                                                                       |
| Gatm       | 5.52  | 2.46  | 3.3E-07 | 6.8E-09 | 67092     | glycine amidinotransferase (L-arginine:glycine amidinotransferase)                                                                    |
| Gck        | 3.25  | 1.70  | 8.3E-05 | 3.9E-06 | 103988    | glucokinase                                                                                                                           |
| Gdf11      | 2.55  | 1.35  | 5.1E-08 | 8.5E-10 | 14561     | growth differentiation factor 11                                                                                                      |
| Gdf5       | 7.72  | 2.95  | 2.4E-14 | 1.1E-16 | 14563     | growth differentiation factor 5                                                                                                       |
| Gdnf       | 2.52  | 1.34  | 2.2E-05 | 8.3E-07 | 14573     | glial cell line derived neurotrophic factor                                                                                           |
| Gfml1      | 0.66  | -0.60 | 1.3E-04 | 6.6E-06 | 28030     | G elongation factor, mitochondrial 1                                                                                                  |
| Gga2       | 2.16  | 1.11  | 8.3E-06 | 2.7E-07 | 74105     | golgi associated, gamma adaptin ear containing, ARF binding protein 2                                                                 |
| Ghr        | 0.61  | -0.72 | 3.2E-06 | 9.3E-08 | 14600     | growth hormone receptor                                                                                                               |
| Gjc3       | 1.99  | 0.99  | 1.8E-04 | 9.8E-06 | 118446    | gap junction protein, gamma 3                                                                                                         |
| Gldn       | 5.09  | 2.35  | 9.5E-18 | 2.7E-20 | 235379    | gliomedin                                                                                                                             |
| Gls        | 0.54  | -0.89 | 8.9E-06 | 2.9E-07 | 14660     | glutaminase                                                                                                                           |
| Gltp       | 1.99  | 0.99  | 1.4E-05 | 4.9E-07 | 56356     | glycolipid transfer protein                                                                                                           |
| Gm11149    | 4.59  | 2.20  | 8.2E-05 | 3.9E-06 | 100036537 | predicted gene 11149                                                                                                                  |
| Gm13889    | 6.59  | 2.72  | 8.0E-21 | 1.6E-23 | 620695    | predicted gene 13889                                                                                                                  |
| Gm16793    | 13.58 | 3.76  | 3.1E-17 | 9.6E-20 | 100504714 | predicted gene, 16793                                                                                                                 |
| Gm4814     | 0.60  | -0.74 | 2.3E-06 | 6.2E-08 | 100502942 | predicted gene 4814                                                                                                                   |
| Gm4980     | 0.59  | -0.76 | 1.3E-06 | 3.3E-08 | 100503386 | predicted gene 4980                                                                                                                   |
| Gm5105     | 0.40  | -1.33 | 6.9E-08 | 1.2E-09 | 329763    | predicted gene 5105                                                                                                                   |
| Gm973      | 2.67  | 1.41  | 1.0E-05 | 3.5E-07 | 381260    | predicted gene 973                                                                                                                    |
| Gna11      | 2.28  | 1.19  | 4.1E-05 | 1.7E-06 | 14677     | guanine nucleotide binding protein (G protein), alpha inhibiting 1                                                                    |
| Gna1       | 1.62  | 0.69  | 1.6E-04 | 8.7E-06 | 14670     | guanine nucleotide binding protein-like 1                                                                                             |
| Gor1       | 0.57  | -0.82 | 5.3E-06 | 1.6E-07 | 14718     | glutamate oxaloacetate transaminase 1, soluble                                                                                        |
| Gp1bb      | 3.26  | 1.71  | 1.2E-05 | 4.3E-07 | 14724     | glycoprotein Ib, beta polypeptide                                                                                                     |
| Gpc4       | 2.23  | 1.15  | 3.2E-06 | 9.1E-08 | 14735     | glypican 4                                                                                                                            |
| Gpcpd1     | 0.46  | -1.12 | 9.0E-07 | 2.1E-08 | 74182     | glycerophosphocholine phosphodiesterase GDE1 homolog                                                                                  |
| Gpd2       | 0.46  | -1.12 | 1.9E-06 | 5.0E-08 | 14571     | glycerol phosphate dehydrogenase 2, mitochondrial                                                                                     |
| Gpt2       | 0.43  | -1.20 | 1.9E-06 | 5.1E-08 | 108682    | glutamic pyruvate transaminase 2, mitochondrial                                                                                       |
| Gps1       | 2.45  | 1.29  | 3.3E-15 | 1.3E-17 | 14775     | glutathione peroxidase 1                                                                                                              |
| Gps8       | 2.27  | 1.18  | 4.2E-09 | 5.2E-11 | 69590     | glutathione peroxidase 8 (putative)                                                                                                   |
| Grb10      | 1.88  | 0.91  | 8.2E-05 | 3.9E-06 | 14783     | growth factor receptor bound protein 10                                                                                               |
| Grin3b     | 2.62  | 1.39  | 2.1E-05 | 7.8E-07 | 170483    | glutamate receptor, ionotropic, NMDA3B                                                                                                |
| Grrp1      | 2.37  | 1.24  | 2.8E-05 | 1.1E-06 | 72690     | glycine/arginine rich protein 1                                                                                                       |
| Gsn        | 1.80  | 0.84  | 6.3E-06 | 2.0E-07 | 227753    | gelsolin                                                                                                                              |
| Guk1       | 2.36  | 1.24  | 1.1E-11 | 7.9E-14 | 14923     | guanylate kinase 1                                                                                                                    |
| H19        | 2.29  | 1.20  | 7.1E-05 | 3.3E-06 | 14955     | H19 fetal liver mRNA                                                                                                                  |
| H2afj      | 1.75  | 0.81  | 1.1E-04 | 5.4E-06 | 232440    | H2A histone family, member J                                                                                                          |
| H6pd       | 0.62  | -0.70 | 4.1E-06 | 1.2E-07 | 100198    | hexose-6-phosphate dehydrogenase (glucose 1-dehydrogenase)                                                                            |
| HadhA      | 0.64  | -0.64 | 1.0E-05 | 3.5E-07 | 97212     | hydroxyacyl-Coenzyme A dehydrogenase/3-ketoacyl-Coenzyme A thiolase/enoyl-Coenzyme A hydratase (trifunctional protein), alpha subunit |
| Haghl      | 2.12  | 1.08  | 1.9E-09 | 2.2E-11 | 68977     | hydroxyacylglutathione hydrolase-like                                                                                                 |
| Hecs       | 0.59  | -0.77 | 2.1E-05 | 7.7E-07 | 15159     | holocytochrome c synthetase                                                                                                           |
| Herc1      | 0.54  | -0.89 | 1.3E-06 | 3.3E-08 | 235439    | heet (homologous to the E6-AP (UBE3A) carboxyl terminus) domain and RCC1 (CHC1)-like domain (RLD) 1                                   |
| Hexa       | 1.82  | 0.87  | 1.0E-06 | 2.5E-08 | 15211     | hexosaminidase A                                                                                                                      |
| Hif3a      | 3.48  | 1.80  | 3.1E-08 | 4.6E-10 | 53417     | hypoxia inducible factor 3, alpha subunit                                                                                             |
| Hist1h1c   | 1.71  | 0.78  | 2.0E-05 | 7.5E-07 | 50708     | histone cluster 1, H1c                                                                                                                |
| Hist1h1d   | 4.18  | 2.06  | 3.0E-09 | 3.7E-11 | 14957     | histone cluster 1, H1d                                                                                                                |
| Hist1h1e   | 2.51  | 1.33  | 1.0E-05 | 3.5E-07 | 50709     | histone cluster 1, H1e                                                                                                                |
| Hist1h4i   | 1.97  | 0.98  | 1.8E-06 | 4.7E-08 | 319158    | histone cluster 1, H4i                                                                                                                |
| Hkl1       | 2.63  | 1.40  | 7.5E-10 | 7.9E-12 | 15275     | hexokinase 1                                                                                                                          |
| Hmgal1     | 1.98  | 0.99  | 7.4E-05 | 3.4E-06 | 15361     | high mobility group AT-hook 1                                                                                                         |
| Hmgal1-rs1 | 2.02  | 1.01  | 7.0E-05 | 3.2E-06 | 111241    | high mobility group AT-hook 1, related sequence 1                                                                                     |
| Hmges2     | 3.65  | 1.87  | 6.6E-07 | 1.5E-08 | 15360     | 3-hydroxy-3-methylglutaryl-Coenzyme A synthase 2                                                                                      |
| Hoga1      | 2.22  | 1.15  | 4.6E-05 | 2.0E-06 | 67432     | 4-hydroxy-2-oxoglutarate aldolase 1                                                                                                   |
| Homer1     | 0.53  | -0.91 | 5.7E-06 | 1.7E-07 | 26556     | homer homolog 1                                                                                                                       |
| Hook3      | 0.47  | -1.10 | 2.1E-10 | 1.9E-12 | 320191    | hook homolog 3                                                                                                                        |
| Hoxd9      | 2.30  | 1.20  | 9.9E-05 | 4.8E-06 | 15437     | homeobox D8                                                                                                                           |
| Hoxd8      | 3.28  | 1.71  | 1.7E-05 | 6.2E-07 | 15438     | homeobox D9                                                                                                                           |
| Hp         | 9.12  | 3.19  | 3.8E-16 | 1.4E-18 | 15439     | haptoglobin                                                                                                                           |
| Hrasls     | 0.32  | -1.63 | 1.7E-06 | 4.4E-08 | 27281     | HRAS-like suppressor                                                                                                                  |
| Hrc        | 0.61  | -0.72 | 6.7E-06 | 2.1E-07 | 15464     | histidine rich calcium binding protein                                                                                                |
| Hs6st2     | 2.03  | 1.02  | 4.8E-06 | 1.4E-07 | 50786     | heparan sulfate 6-O-sulfotransferase 2                                                                                                |
| Hsd11b1    | 0.51  | -0.99 | 5.7E-05 | 2.5E-06 | 15483     | hydroxysteroid 11-beta dehydrogenase 1                                                                                                |
| Hsd17b14   | 4.43  | 2.15  | 2.7E-07 | 5.3E-09 | 66065     | hydroxysteroid (17-beta) dehydrogenase 14                                                                                             |
| Hsd17b4    | 0.60  | -0.74 | 4.5E-06 | 1.3E-07 | 15488     | hydroxysteroid (17-beta) dehydrogenase 4                                                                                              |
| Hsd12      | 0.63  | -0.66 | 3.1E-05 | 1.2E-06 | 72479     | hydroxysteroid dehydrogenase like 2                                                                                                   |
| Hspa1a     | 4.12  | 2.04  | 1.7E-13 | 9.2E-16 | 193740    | heat shock protein 1A                                                                                                                 |
| Hspa1b     | 3.87  | 1.95  | 1.7E-06 | 4.6E-08 | 15511     | heat shock protein 1B                                                                                                                 |
| Hspa11     | 1.94  | 0.96  | 1.2E-08 | 1.7E-10 | 15482     | heat shock protein 1-like                                                                                                             |
| Hspb1      | 3.84  | 1.94  | 4.4E-15 | 1.8E-17 | 15507     | heat shock protein 1                                                                                                                  |
| Hspb11     | 2.08  | 1.06  | 1.8E-05 | 6.4E-07 | 72938     | heat shock protein family B (small), member 11                                                                                        |
| Hspb8      | 1.95  | 0.97  | 4.0E-06 | 1.2E-07 | 80888     | heat shock protein 8                                                                                                                  |
| Htatip2    | 2.39  | 1.26  | 2.1E-06 | 5.8E-08 | 53415     | HIV-1 tat interactive protein 2, homolog                                                                                              |
| Id1        | 1.81  | 0.85  | 1.3E-05 | 4.5E-07 | 15901     | inhibitor of DNA binding 1                                                                                                            |
| Id2        | 2.22  | 1.15  | 3.0E-05 | 1.2E-06 | 15902     | inhibitor of DNA binding 2                                                                                                            |
| Idh3a      | 0.56  | -0.84 | 6.6E-06 | 2.1E-07 | 67834     | isocitrate dehydrogenase 3 (NAD+) alpha                                                                                               |
| Idh3g      | 0.58  | -0.78 | 3.7E-05 | 1.5E-06 | 15929     | isocitrate dehydrogenase 3 (NAD+), gamma                                                                                              |
| Ifitm10    | 3.10  | 1.63  | 5.9E-05 | 2.6E-06 | 320802    | interferon induced transmembrane protein 10                                                                                           |
| Ifnar2     | 2.17  | 1.12  | 4.9E-09 | 6.2E-11 | 15976     | interferon (alpha and beta) receptor 2                                                                                                |
| Igdec4     | 1.74  | 0.80  | 6.7E-06 | 2.1E-07 | 56741     | immunoglobulin superfamily, DCC subclass, member 4                                                                                    |
| Igfbp2     | 7.34  | 2.88  | 5.0E-25 | 8.0E-28 | 319765    | insulin-like growth factor 2 mRNA binding protein 2                                                                                   |
| Igfbp2     | 6.73  | 2.75  | 2.6E-06 | 7.3E-08 | 111975    | insulin-like growth factor 2, opposite strand                                                                                         |
| Igfbp2     | 14.85 | 3.89  | 2.8E-07 | 5.7E-09 | 16008     | insulin-like growth factor binding protein 2                                                                                          |
| Igf1       | 18.20 | 4.19  | 1.4E-27 | 1.9E-30 | 209268    | immunoglobulin superfamily, member 1                                                                                                  |
| Il17re     | 17.25 | 4.11  | 2.7E-34 | 2.0E-37 | 57890     | interleukin 17 receptor E                                                                                                             |
| Il18bp     | 2.72  | 1.44  | 2.6E-06 | 7.2E-08 | 16068     | interleukin 18 binding protein                                                                                                        |
| Il20rb     | 2.84  | 1.51  | 1.8E-05 | 6.8E-07 | 213208    | interleukin 20 receptor beta                                                                                                          |
| Int2       | 1.66  | 0.73  | 9.7E-05 | 4.8E-06 | 70435     | inverted formin, FH2 and WH2 domain containing                                                                                        |
| Inha       | 0.50  | -1.00 | 4.3E-05 | 1.8E-06 | 16322     | inhibin alpha                                                                                                                         |
| Ino80      | 0.59  | -0.75 | 1.7E-04 | 8.9E-06 | 68142     | INO80 homolog                                                                                                                         |
| Ino80dos   | 0.59  | -0.75 | 9.1E-06 | 3.0E-07 | 100380944 | INO80 complex subunit D, opposite strand                                                                                              |
| Irf2bp2    | 1.84  | 0.88  | 6.7E-05 | 3.1E-06 | 270110    | interferon regulatory factor 2 binding protein 2                                                                                      |
| Irx3       | 5.71  | 2.51  | 2.1E-10 | 1.9E-12 | 16373     | Iroquois related homeobox 3                                                                                                           |
| Islr2      | 2.65  | 1.41  | 1.8E-04 | 9.7E-06 | 320563    | immunoglobulin superfamily containing leucine-rich repeat 2                                                                           |
| Iggs5      | 1.91  | 0.94  | 3.0E-06 | 8.4E-08 | 16402     | integrin alpha 5 (fibronectin receptor alpha)                                                                                         |
| Iggs9      | 5.47  | 2.45  | 6.1E-32 | 6.0E-35 | 104099    | integrin alpha 9                                                                                                                      |
| Iggh1bp2   | 1.71  | 0.77  | 3.5E-08 | 5.5E-10 | 26549     | integrin beta 1 binding protein 2                                                                                                     |
| Igfb5      | 0.63  | -0.67 | 3.0E-05 | 1.2E-06 | 16419     | integrin beta 5                                                                                                                       |
| Ivd        | 0.54  | -0.90 | 4.3E-05 | 1.8E-06 | 56357     | isovaleryl coenzyme A dehydrogenase                                                                                                   |
| Junb       | 2.78  | 1.47  | 3.6E-05 | 1.5E-06 | 16477     | Jun-B oncoprotein                                                                                                                     |
| Kank1      | 1.90  | 0.93  | 1.2E-05 | 4.0E-07 | 107351    | KN motif and ankyrin repeat domains 1                                                                                                 |
| Kat5a      | 0.55  | -0.86 | 2.4E-05 | 9.4E-07 | 244349    | lysine (K) acetyltransferase 6A                                                                                                       |
| Katna2     | 76.87 | 6.26  | 2.1E-47 | 4.8E-51 | 71206     | katanin p60 subunit A-like 2                                                                                                          |
| Kbtbd12    | 0.42  | -1.24 | 5.0E-05 | 2.1E-06 | 74589     | kelch repeat and BTB (POZ) domain containing 12                                                                                       |
| Kbtbd13    | 0.41  | -1.28 | 3.6E-12 | 2.3E-14 | 74492     | kelch repeat and BTB (POZ) domain containing 13                                                                                       |
| Kcna1      | 2.94  | 1.56  | 4.6E-12 | 3.0E-14 | 16485     | potassium voltage-gated channel, shaker-related subfamily, member 1                                                                   |
| Kcna6      | 3.25  | 1.70  | 2.0E-06 | 5.2E-08 | 16494     | potassium voltage-gated channel, shaker-related, subfamily, member 6                                                                  |
| Kcnc11     | 2.33  | 1.22  | 6.0E-14 | 3.0E-16 | 66240     | potassium voltage-gated channel, Isk-related family, member 1-like, pseudogene                                                        |
| Kcnf1      | 2.72  | 1.45  | 2.9E-05 | 1.1E-06 | 382571    | potassium voltage-gated channel, subfamily F, member 1                                                                                |
| Kcnh2      | 2.77  | 1.47  | 6.7E-14 | 3.4E-16 | 16511     | potassium voltage-gated channel, subfamily H (cag-related), member 2                                                                  |
| Kcnn3      | 2.58  | 1.37  | 9.1E-11 | 8.0E-13 | 140493    | potassium intermediate/small conductance calcium-activated channel, subfamily N, member 3                                             |
| Kdm5a      | 0.57  | -0.81 | 6.6E-07 | 1.5E-08 | 214899    | lysine (K)-specific demethylase 5A                                                                                                    |
| Kdm7a      | 0.59  | -0.75 | 1.1E-05 | 3.7E-07 | 338523    | lysine (K)-specific demethylase 7a                                                                                                    |
| Khdrbs3    | 0.42  | -1.24 | 8.4E-05 | 4.0E-06 | 13992     | KH domain containing, RNA binding, signal transduction associated 3                                                                   |
| Kif19a     | 3.62  | 1.86  | 9.0E-07 | 2.1E-08 | 286942    | kinesin family member 19A                                                                                                             |
| Kif1a      | 2.99  | 1.58  | 1.3E-04 | 7.0E-06 | 16560     | kinesin family member 1A                                                                                                              |
| Kif1b      | 0.57  | -0.82 | 2.5E-06 | 6.8E-08 | 16561     | kinesin family member 1B                                                                                                              |
| Kif12      | 0.44  | -1.17 | 1.9E-05 | 7.2E-07 | 16597     | Kruppel-like factor 12                                                                                                                |
| Klf2       | 1.84  | 0.88  | 1.7E-04 | 8.9E-06 | 16598     | Kruppel-like factor 2 (lung)                                                                                                          |
| Klf5       | 3.66  | 1.87  | 1.3E-06 | 3.2E-08 | 12224     | Kruppel-like factor 5                                                                                                                 |
| Klhd7a     | 9.87  | 3.30  | 3.1E-10 | 2.9E-12 | 242721    | kelch domain containing 7A                                                                                                            |

|           |       |       |         |         |           |                                                                                                    |
|-----------|-------|-------|---------|---------|-----------|----------------------------------------------------------------------------------------------------|
| Klhd8b    | 2.37  | 1.24  | 8.5E-09 | 1.1E-10 | 78267     | kelch domain containing 8B                                                                         |
| Klhl13    | 2.54  | 1.34  | 1.0E-06 | 2.4E-08 | 67455     | kelch-like 13                                                                                      |
| Klhl24    | 0.60  | -0.73 | 7.9E-05 | 3.7E-06 | 75785     | kelch-like 24                                                                                      |
| Klhl30    | 1.64  | 0.71  | 4.4E-05 | 1.9E-06 | 70788     | kelch-like 30                                                                                      |
| Klhl34    | 0.44  | -1.20 | 2.0E-06 | 5.3E-08 | 245683    | kelch-like 34                                                                                      |
| Krt18     | 5.96  | 2.58  | 3.7E-12 | 2.5E-14 | 16668     | keratin 18                                                                                         |
| Lamc2     | 3.11  | 1.64  | 1.1E-06 | 2.6E-08 | 16782     | laminin, gamma 2                                                                                   |
| Large     | 1.81  | 0.86  | 4.1E-06 | 1.2E-07 | 16795     | like-glycosyltransferase                                                                           |
| Larp4     | 0.57  | -0.80 | 3.0E-05 | 1.2E-06 | 207214    | La ribonucleoprotein domain family, member 4                                                       |
| Lbx2      | 3.61  | 1.85  | 3.0E-07 | 6.0E-09 | 16815     | ladybird homeobox homolog 2                                                                        |
| Lcor      | 0.29  | -1.77 | 1.2E-05 | 4.3E-07 | 212391    | ligand dependent nuclear receptor corepressor                                                      |
| Ldlrad3   | 3.11  | 1.64  | 5.8E-09 | 7.3E-11 | 241576    | low density lipoprotein receptor class A domain containing 3                                       |
| Lep       | 8.31  | 3.06  | 2.3E-09 | 2.8E-11 | 16846     | leptin                                                                                             |
| Leprel1   | 3.70  | 1.89  | 3.6E-13 | 2.1E-15 | 210530    | leprecan-like 1                                                                                    |
| Lgals1    | 2.68  | 1.42  | 1.4E-08 | 1.9E-10 | 16852     | lectin, galactose binding, soluble 1                                                               |
| Lgals12   | 9.93  | 3.31  | 1.5E-12 | 9.4E-15 | 56072     | lectin, galactose binding, soluble 12                                                              |
| Lgals3    | 17.05 | 4.09  | 1.1E-11 | 8.0E-14 | 16854     | lectin, galactose binding, soluble 3                                                               |
| Lifr      | 0.46  | -1.12 | 2.7E-07 | 5.3E-09 | 16880     | leukemia inhibitory factor receptor                                                                |
| Limd2     | 1.81  | 0.86  | 3.1E-05 | 1.2E-06 | 67803     | LIM domain containing 2                                                                            |
| Lin9      | 0.38  | -1.38 | 7.5E-05 | 3.5E-06 | 72568     | lin-9 homolog                                                                                      |
| Lingo3    | 2.29  | 1.19  | 1.0E-07 | 1.8E-09 | 237403    | leucine rich repeat and Ig domain containing 3                                                     |
| Lman1     | 0.57  | -0.82 | 2.9E-06 | 8.3E-08 | 70361     | lectin, mannose-binding, 1                                                                         |
| Lmed1     | 2.32  | 1.21  | 3.6E-08 | 5.6E-10 | 30937     | LIM and cysteine-rich domains 1                                                                    |
| Lmo2      | 1.90  | 0.93  | 4.8E-05 | 2.1E-06 | 16909     | LIM domain only 2                                                                                  |
| Lnpep     | 0.38  | -1.41 | 3.2E-05 | 1.3E-06 | 240028    | leucyl/cystinyl aminopeptidase                                                                     |
| Lox       | 1.98  | 0.98  | 9.0E-05 | 4.3E-06 | 16948     | lysoyl oxidase                                                                                     |
| Lpar1     | 2.05  | 1.04  | 8.2E-06 | 2.7E-07 | 14745     | lysophosphatidic acid receptor 1                                                                   |
| Lrp11     | 1.90  | 0.93  | 2.0E-05 | 7.5E-07 | 237253    | low density lipoprotein receptor-related protein 11                                                |
| Lrrc8     | 3.24  | 1.69  | 1.3E-04 | 6.6E-06 | 214345    | leucine rich repeat containing 18                                                                  |
| Lrrc38    | 0.31  | -1.68 | 4.6E-07 | 9.8E-09 | 242735    | leucine rich repeat containing 38                                                                  |
| Lrrc3b    | 6.38  | 2.67  | 1.1E-23 | 2.0E-26 | 218763    | leucine rich repeat containing 3B                                                                  |
| Lrrc1     | 1.90  | 0.92  | 6.5E-05 | 2.9E-06 | 71710     | leucine rich repeat and coiled-coil domain containing 1                                            |
| Lrrm1     | 2.97  | 1.57  | 6.4E-08 | 1.1E-09 | 16979     | leucine rich repeat protein 1, neuronal                                                            |
| Lsp1      | 1.61  | 0.68  | 1.0E-05 | 3.5E-07 | 16895     | lymphocyte specific 1                                                                              |
| Lypd6     | 0.26  | -1.95 | 3.5E-07 | 7.2E-09 | 320343    | LY6/PLAUR domain containing 6                                                                      |
| Lypal1    | 2.16  | 1.11  | 6.9E-05 | 3.2E-06 | 226791    | lysophospholipase-like 1                                                                           |
| Lysmd2    | 2.70  | 1.43  | 2.0E-11 | 1.6E-13 | 70082     | LysM, putative peptidoglycan-binding, domain containing 2                                          |
| Lysmd3    | 0.52  | -0.93 | 7.5E-05 | 3.5E-06 | 80289     | LysM, putative peptidoglycan-binding, domain containing 3                                          |
| Lyz1      | 2.94  | 1.56  | 2.1E-08 | 3.0E-10 | 17110     | lysozyme 1                                                                                         |
| Maged2    | 2.36  | 1.24  | 1.2E-05 | 4.0E-07 | 80884     | melanoma antigen, family D, 2                                                                      |
| Mal       | 4.67  | 2.22  | 1.6E-11 | 1.2E-13 | 17153     | myelin and lymphocyte protein, T cell differentiation protein                                      |
| Mamd2     | 3.58  | 1.84  | 5.5E-06 | 1.7E-07 | 71738     | MAM domain containing 2                                                                            |
| Man2a2    | 0.62  | -0.69 | 1.1E-04 | 5.3E-06 | 140481    | mannosidase 2, alpha 2                                                                             |
| Map1a     | 3.13  | 1.64  | 7.3E-14 | 3.8E-16 | 17754     | microtubule-associated protein 1A                                                                  |
| Map1b     | 3.16  | 1.66  | 1.2E-20 | 2.5E-23 | 17755     | microtubule-associated protein 1B                                                                  |
| Map2k1    | 1.75  | 0.81  | 9.4E-05 | 4.5E-06 | 26395     | mitogen-activated protein kinase kinase 1                                                          |
| Map3k7cl  | 3.11  | 1.64  | 2.6E-17 | 7.8E-20 | 224419    | MAP3K7 C-terminal like                                                                             |
| Mapk11    | 2.51  | 1.33  | 1.5E-05 | 5.2E-07 | 19094     | mitogen-activated protein kinase 11                                                                |
| March6    | 0.58  | -0.78 | 8.6E-07 | 2.0E-08 | 223455    | membrane-associated ring finger (C3HC4) 6                                                          |
| Mark1     | 2.04  | 1.03  | 4.0E-06 | 1.2E-07 | 226778    | MAP/microtubule affinity-regulating kinase 1                                                       |
| Marvel1   | 1.79  | 0.84  | 3.7E-05 | 1.5E-06 | 277010    | MARVEL (membrane-associating) domain containing 1                                                  |
| Mavs      | 0.66  | -0.61 | 9.9E-05 | 4.9E-06 | 228607    | mitochondrial antiviral signaling protein                                                          |
| Mbnl1     | 0.52  | -0.95 | 1.3E-04 | 6.5E-06 | 56758     | muscleblind-like 1                                                                                 |
| Mbp       | 4.72  | 2.24  | 4.2E-11 | 3.5E-13 | 17196     | myelin basic protein                                                                               |
| Mccc1     | 0.44  | -1.19 | 4.5E-06 | 1.3E-07 | 72039     | methylcrotonyl-Coenzyme A carboxylase 1 (alpha)                                                    |
| Mdm4      | 0.58  | -0.78 | 1.1E-04 | 5.5E-06 | 17248     | transformed mouse 3T3 cell double minute 4                                                         |
| Me2       | 3.92  | 1.97  | 1.2E-07 | 2.2E-09 | 107029    | malic enzyme 2, NAD(+)-dependent, mitochondrial                                                    |
| Me3       | 0.56  | -0.84 | 1.1E-06 | 2.8E-08 | 109264    | malic enzyme 3, NADP(+)-dependent, mitochondrial                                                   |
| Meg3      | 3.50  | 1.81  | 1.1E-14 | 5.1E-17 | 17263     | maternally expressed 3                                                                             |
| Met       | 0.40  | -1.33 | 1.8E-10 | 1.6E-12 | 17295     | met proto-oncogene                                                                                 |
| Metrn     | 2.56  | 1.35  | 1.2E-14 | 5.5E-17 | 70083     | meteorin, glial cell differentiation regulator                                                     |
| Mettl21c  | 2.39  | 1.26  | 1.5E-12 | 9.2E-15 | 433294    | methyltransferase like 21C                                                                         |
| Mfap3l    | 1.65  | 0.72  | 6.5E-05 | 3.0E-06 | 71306     | microfibrillar-associated protein 3-like                                                           |
| Mfap5     | 1.92  | 0.94  | 7.9E-05 | 3.7E-06 | 50530     | microfibrillar-associated protein 5                                                                |
| Mfas1     | 4.74  | 2.25  | 4.4E-34 | 3.4E-37 | 52065     | malignant fibrous histiocytoma amplified sequence 1                                                |
| Mfn1      | 0.62  | -0.69 | 6.9E-05 | 3.1E-06 | 67414     | mitofusin 1                                                                                        |
| Mfsd7b    | 0.44  | -1.17 | 3.0E-06 | 8.5E-08 | 226844    | major facilitator superfamily domain containing 7B                                                 |
| Mga       | 0.58  | -0.78 | 2.1E-05 | 8.1E-07 | 29808     | MAX gene associated                                                                                |
| Mgmt      | 2.55  | 1.35  | 8.2E-05 | 3.9E-06 | 17314     | O-6-methylguanine-DNA methyltransferase                                                            |
| Mgp       | 1.85  | 0.89  | 2.5E-09 | 3.0E-11 | 17313     | matrix Gla protein                                                                                 |
| Mgst1     | 3.13  | 1.65  | 3.8E-08 | 5.9E-10 | 56615     | microsomal glutathione S-transferase 1                                                             |
| Mib1      | 0.52  | -0.96 | 1.4E-04 | 7.3E-06 | 225164    | mindbomb homolog 1                                                                                 |
| Mical2    | 0.33  | -1.59 | 2.6E-05 | 1.0E-06 | 320878    | microtubule associated monooxygenase, calponin and LIM domain containing 2                         |
| Mical11   | 1.77  | 0.82  | 6.1E-06 | 1.9E-07 | 27008     | microtubule associated monooxygenase, calponin and LIM domain containing -like 1                   |
| Micu2     | 1.74  | 0.80  | 1.8E-05 | 6.7E-07 | 68514     | mitochondrial calcium uptake 2                                                                     |
| Mimpp1    | 1.76  | 0.82  | 9.5E-05 | 4.6E-06 | 17330     | multiple inositol polyphosphate histidine phosphatase 1                                            |
| Mir1906-1 | 2.90  | 1.54  | 1.2E-05 | 4.2E-07 | 100316809 | microRNA 1906-1                                                                                    |
| Mir1906-2 | 2.90  | 1.54  | 1.3E-05 | 4.5E-07 | 100499530 | microRNA 1906-2                                                                                    |
| Mir410    | 9.16  | 3.20  | 3.3E-12 | 2.1E-14 | 723863    | microRNA 410                                                                                       |
| Mir675    | 2.14  | 1.10  | 1.1E-04 | 5.4E-06 | 735280    | microRNA 675                                                                                       |
| Mirg      | 7.56  | 2.92  | 3.3E-22 | 6.2E-25 | 100040724 | miRNA containing gene                                                                              |
| Mllt11    | 1.86  | 0.90  | 5.1E-09 | 6.4E-11 | 56772     | myeloid/lymphoid or mixed-lineage leukemia (trithorax homolog); translocated to, 11                |
| Mob1b     | 0.50  | -1.01 | 1.9E-05 | 7.0E-07 | 68473     | MOB kinase activator 1B                                                                            |
| Mpp1      | 1.82  | 0.87  | 1.6E-07 | 3.0E-09 | 17524     | membrane protein, palmitoylated                                                                    |
| Mpp3      | 0.35  | -1.52 | 3.3E-09 | 3.9E-11 | 13384     | membrane protein, palmitoylated 3 (MAGUK p55 subfamily member 3)                                   |
| Mpz       | 4.52  | 2.18  | 2.3E-12 | 1.5E-14 | 17528     | myelin protein zero                                                                                |
| Mreg      | 0.54  | -0.90 | 2.3E-06 | 6.3E-08 | 381269    | melanoregulin                                                                                      |
| Msln      | 24.78 | 4.63  | 6.8E-10 | 7.1E-12 | 56047     | mesothelin                                                                                         |
| Mt1       | 7.22  | 2.85  | 6.2E-11 | 5.3E-13 | 17748     | metallothionein 1                                                                                  |
| Mt2       | 29.49 | 4.88  | 2.7E-17 | 8.4E-20 | 17750     | metallothionein 2                                                                                  |
| Mt3       | 9.33  | 3.22  | 4.5E-10 | 4.6E-12 | 17751     | metallothionein 3                                                                                  |
| Mthfd2    | 2.21  | 1.14  | 1.2E-04 | 6.1E-06 | 17768     | methylenetetrahydrofolate dehydrogenase (NAD+ dependent), methylenetetrahydrofolate cyclohydrolase |
| Mum11     | 0.49  | -1.04 | 5.4E-05 | 2.4E-06 | 245631    | melanoma associated antigen (mutated) 1-like 1                                                     |
| Mustn1    | 3.33  | 1.74  | 6.0E-07 | 1.3E-08 | 66175     | musculoskeletal, embryonic nuclear protein 1                                                       |
| Mut       | 0.56  | -0.84 | 6.6E-06 | 2.1E-07 | 17850     | methylmalonyl-Coenzyme A mutase                                                                    |
| Mvp       | 1.86  | 0.90  | 1.9E-09 | 2.1E-11 | 78388     | major vault protein                                                                                |
| Myh1      | 1.59  | 0.67  | 3.4E-05 | 1.4E-06 | 17879     | myosin, heavy polypeptide 1, skeletal muscle, adult                                                |
| Myh3      | 27.47 | 4.78  | 1.8E-18 | 4.5E-21 | 17883     | myosin, heavy polypeptide 3, skeletal muscle, embryonic                                            |
| Myh7      | 9.97  | 3.32  | 6.3E-06 | 2.0E-07 | 140781    | myosin, heavy polypeptide 7, cardiac muscle, beta                                                  |
| Myh8      | 34.29 | 5.10  | 3.7E-13 | 2.1E-15 | 17885     | myosin, heavy polypeptide 8, skeletal muscle, perinatal                                            |
| Myh12a    | 1.86  | 0.89  | 3.2E-05 | 1.3E-06 | 67268     | myosin, light chain 12A, regulatory, non-sarcomeric                                                |
| Myh2      | 4.74  | 2.25  | 1.2E-04 | 6.1E-06 | 17906     | myosin, light polypeptide 2, regulatory, cardiac, slow                                             |
| Myh4      | 23.04 | 4.53  | 2.1E-19 | 4.8E-22 | 17896     | myosin, light polypeptide 4                                                                        |
| Myh6      | 2.02  | 1.02  | 5.2E-12 | 3.5E-14 | 17904     | myosin, light polypeptide 6, alkali, smooth muscle and non-muscle                                  |
| Myh6b     | 4.57  | 2.19  | 1.6E-07 | 2.9E-09 | 216459    | myosin, light polypeptide 6B                                                                       |
| Myo5c     | 0.23  | -2.12 | 8.2E-06 | 2.7E-07 | 208943    | myosin VC                                                                                          |
| Myoc      | 3.27  | 1.71  | 4.4E-10 | 4.4E-12 | 17826     | myocilin                                                                                           |
| Myog      | 3.09  | 1.63  | 3.5E-05 | 1.4E-06 | 17928     | myogenin                                                                                           |
| Myom3     | 4.95  | 2.31  | 2.0E-18 | 5.1E-21 | 242702    | myomesin family, member 3                                                                          |
| Myoz2     | 4.90  | 2.29  | 3.5E-16 | 1.3E-18 | 59006     | myozenin 2                                                                                         |
| Myoz3     | 0.54  | -0.90 | 2.0E-07 | 3.8E-09 | 170947    | myozenin 3                                                                                         |
| Nacad     | 3.39  | 1.76  | 1.6E-09 | 1.9E-11 | 192950    | NAC alpha domain containing                                                                        |
| Nat8l     | 5.95  | 2.57  | 7.9E-07 | 1.8E-08 | 269642    | N-acetyltransferase 8-like                                                                         |
| Nbeal1    | 0.47  | -1.08 | 2.6E-05 | 1.0E-06 | 269198    | neurobeachin like 1                                                                                |
| Ncam1     | 4.18  | 2.06  | 9.5E-06 | 3.2E-07 | 17967     | neural cell adhesion molecule 1                                                                    |
| Nckap11   | 3.83  | 1.94  | 1.3E-11 | 9.4E-14 | 105855    | NCK associated protein 1 like                                                                      |
| Ncmap     | 3.41  | 1.77  | 7.0E-08 | 1.2E-09 | 230822    | noncompact myelin associated protein                                                               |
| Ncoa1     | 0.56  | -0.83 | 4.8E-08 | 7.8E-10 | 17977     | nuclear receptor coactivator 1                                                                     |
| Ncoa2     | 0.66  | -0.60 | 1.8E-04 | 1.0E-05 | 17978     | nuclear receptor coactivator 2                                                                     |
| Nes1      | 2.26  | 1.17  | 8.8E-06 | 2.9E-07 | 14299     | neuronal calcium sensor 1                                                                          |
| Ndn       | 3.70  | 1.89  | 4.7E-10 | 4.8E-12 | 17984     | neccdin                                                                                            |
| Ndrg1     | 1.90  | 0.93  | 4.1E-06 | 1.2E-07 | 17988     | N-myc downstream regulated gene 1                                                                  |
| Ndrg4     | 2.85  | 1.51  | 1.1E-11 | 8.3E-14 | 234593    | N-myc downstream regulated gene 4                                                                  |



|          |       |       |         |         |        |                                                                                                              |
|----------|-------|-------|---------|---------|--------|--------------------------------------------------------------------------------------------------------------|
| Ndufs1   | 0.60  | -0.75 | 1.4E-05 | 5.0E-07 | 227197 | NADH dehydrogenase (ubiquinone) Fe-S protein 1                                                               |
| Neb      | 0.39  | -1.35 | 4.1E-09 | 5.0E-11 | 17996  | nebulin                                                                                                      |
| Nek7     | 0.57  | -0.81 | 2.3E-07 | 4.4E-09 | 59125  | NIMA (never in mitosis gene a)-related expressed kinase 7                                                    |
| Nes      | 3.05  | 1.61  | 1.6E-14 | 7.5E-17 | 18008  | nestin                                                                                                       |
| Net1     | 2.72  | 1.45  | 3.9E-08 | 6.2E-10 | 56349  | neuroepithelial cell transforming gene 1                                                                     |
| Neur3    | 2.70  | 1.43  | 2.2E-10 | 2.1E-12 | 214854 | neuralized homolog 3 homolog                                                                                 |
| Nfate2   | 2.02  | 1.02  | 5.3E-05 | 2.3E-06 | 18019  | nuclear factor of activated T cells, cytoplasmic, calcineurin dependent 2                                    |
| Nfix     | 0.63  | -0.68 | 6.1E-05 | 2.7E-06 | 18032  | nuclear factor I/X                                                                                           |
| Nfyb     | 0.63  | -0.66 | 1.5E-04 | 7.8E-06 | 18045  | nuclear transcription factor-Y beta                                                                          |
| Ninj1    | 2.18  | 1.12  | 3.1E-11 | 2.5E-13 | 18081  | ninjurin 1                                                                                                   |
| Nkd1     | 2.35  | 1.24  | 9.0E-05 | 4.3E-06 | 93960  | naked cuticle 1 homolog                                                                                      |
| Nkx6-2   | 2.13  | 1.09  | 5.7E-05 | 2.5E-06 | 14912  | NK6 homeobox 2                                                                                               |
| Nlrc3    | 10.86 | 3.44  | 7.4E-18 | 2.0E-20 | 268857 | NLR family, CARD domain containing 3                                                                         |
| Nlrp10   | 3.12  | 1.64  | 5.4E-08 | 9.0E-10 | 244202 | NLR family, pyrin domain containing 10                                                                       |
| Nme4     | 4.49  | 2.17  | 5.1E-09 | 6.4E-11 | 56520  | NME/NM23 nucleoside diphosphate kinase 4                                                                     |
| Nnat     | 9.18  | 3.20  | 2.7E-13 | 1.5E-15 | 18111  | neuronatin                                                                                                   |
| Nog      | 4.65  | 2.22  | 4.0E-07 | 8.4E-09 | 18121  | noggin                                                                                                       |
| Nol3     | 1.57  | 0.65  | 1.7E-05 | 6.1E-07 | 78688  | nucleolar protein 3 (apoptosis repressor with CARD domain)                                                   |
| Nov      | 2.23  | 1.16  | 2.1E-05 | 8.1E-07 | 18133  | nephroblastoma overexpressed gene                                                                            |
| Nova1    | 2.01  | 1.01  | 1.2E-04 | 6.3E-06 | 664883 | neuro-oncological ventral antigen 1                                                                          |
| Npnt     | 5.44  | 2.44  | 1.0E-12 | 6.2E-15 | 114249 | nephronectin                                                                                                 |
| Npr3     | 8.20  | 3.04  | 1.2E-54 | 1.7E-58 | 18162  | natriuretic peptide receptor 3                                                                               |
| Nrcam    | 16.39 | 4.03  | 2.1E-12 | 1.3E-14 | 319504 | neuron-glia-CAM-related cell adhesion molecule                                                               |
| Nrep     | 0.40  | -1.31 | 3.4E-08 | 5.3E-10 | 27528  | neuronal regeneration related protein                                                                        |
| Nt5c1a   | 0.33  | -1.59 | 4.6E-06 | 1.4E-07 | 230718 | 5'-nucleotidase, cytosolic 1A                                                                                |
| Nt5c2    | 2.43  | 1.28  | 7.5E-07 | 1.7E-08 | 76952  | 5'-nucleotidase, cytosolic II                                                                                |
| Ntrk2    | 2.36  | 1.24  | 1.6E-04 | 8.9E-06 | 18212  | neurotrophic tyrosine kinase, receptor, type 2                                                               |
| Nudt16   | 3.25  | 1.70  | 5.0E-17 | 1.6E-19 | 75686  | nudix (nucleoside diphosphate linked moiety X)-type motif 16                                                 |
| Nudt6    | 0.50  | -1.01 | 6.9E-05 | 3.2E-06 | 229228 | nudix (nucleoside diphosphate linked moiety X)-type motif 6                                                  |
| Nup153   | 0.61  | -0.70 | 1.6E-04 | 8.9E-06 | 218210 | nucleoporin 153                                                                                              |
| Nup210   | 0.55  | -0.84 | 2.2E-05 | 8.2E-07 | 54563  | nucleoporin 210                                                                                              |
| Nup93    | 1.86  | 0.90  | 4.6E-05 | 2.0E-06 | 71805  | nucleoporin 93                                                                                               |
| Nupr1    | 2.27  | 1.19  | 7.7E-08 | 1.3E-09 | 56312  | nuclear protein 1                                                                                            |
| Nwd1     | 2.82  | 1.50  | 2.2E-05 | 8.2E-07 | 319555 | NACHT and WD repeat domain containing 1                                                                      |
| Nxn      | 1.74  | 0.80  | 1.2E-05 | 4.0E-07 | 18230  | nucleoredoxin                                                                                                |
| Obscn    | 0.48  | -1.07 | 5.3E-08 | 8.8E-10 | 380698 | obscurin, cytoskeletal calmodulin and titin-interacting RhoGEF                                               |
| Ode1     | 2.92  | 1.54  | 2.3E-12 | 1.5E-14 | 18263  | ornithine decarboxylase, structural I                                                                        |
| Ogth     | 0.55  | -0.86 | 1.0E-07 | 1.8E-09 | 18293  | oxoglutarate dehydrogenase (lipoamide)                                                                       |
| Ogthl    | 2.09  | 1.06  | 4.5E-05 | 1.9E-06 | 239017 | oxoglutarate dehydrogenase-like                                                                              |
| Orai2    | 4.65  | 2.22  | 1.3E-15 | 5.0E-18 | 269717 | ORAI calcium release-activated calcium modulator 2                                                           |
| Ormdl3   | 1.56  | 0.65  | 4.3E-05 | 1.8E-06 | 66612  | ORML-like 3                                                                                                  |
| Oshpl3   | 5.15  | 2.36  | 6.1E-15 | 2.6E-17 | 71720  | oxysterol binding protein-like 3                                                                             |
| Oshpl6   | 0.49  | -1.01 | 8.4E-05 | 4.0E-06 | 99031  | oxysterol binding protein-like 6                                                                             |
| Oscp1    | 3.58  | 1.84  | 2.3E-05 | 8.7E-07 | 230751 | organic solute carrier partner 1                                                                             |
| Osgin2   | 2.07  | 1.05  | 1.4E-06 | 3.6E-08 | 209212 | oxidative stress induced growth inhibitor family member 2                                                    |
| Otulin   | 1.85  | 0.89  | 1.7E-05 | 6.1E-07 | 209212 | OTU deubiquitinase with linear linkage specificity                                                           |
| Oxct1    | 0.47  | -1.08 | 2.4E-05 | 9.5E-07 | 67041  | 3-oxoacid CoA transferase 1                                                                                  |
| P2ry1    | 0.42  | -1.23 | 9.1E-09 | 1.2E-10 | 18441  | purinergic receptor P2Y, G-protein coupled 1                                                                 |
| P4ha1    | 2.03  | 1.02  | 1.3E-05 | 4.7E-07 | 18451  | procollagen-proline, 2-oxoglutarate 4-dioxygenase (proline 4-hydroxylase), alpha 1 polypeptide               |
| Pag1     | 0.49  | -1.04 | 4.6E-05 | 2.0E-06 | 94212  | phosphoprotein associated with glycosphingolipid microdomains 1                                              |
| Palm2    | 3.94  | 1.98  | 1.3E-06 | 3.1E-08 | 242481 | paralemmin 2                                                                                                 |
| Pamr1    | 2.40  | 1.26  | 6.6E-07 | 1.5E-08 | 210622 | peptidase domain containing associated with muscle regeneration 1                                            |
| Paqr7    | 2.32  | 1.22  | 1.4E-08 | 1.9E-10 | 71904  | progesterin and adipoQ receptor family member VII                                                            |
| Paqr8    | 4.05  | 2.02  | 2.5E-06 | 6.8E-08 | 74229  | progesterin and adipoQ receptor family member VIII                                                           |
| Pax7     | 0.22  | -2.16 | 5.3E-07 | 1.1E-08 | 18509  | paired box gene 7                                                                                            |
| Pcbd1    | 9.97  | 3.32  | 6.8E-20 | 1.5E-22 | 13180  | pterin 4 alpha carbinolamine dehydratase/dimerization cofactor of hepatocyte nuclear factor 1 alpha (TCF1) 1 |
| Pcdhb20  | 0.35  | -1.53 | 3.6E-06 | 1.0E-07 | 93891  | protocadherin beta 20                                                                                        |
| Pck1     | 26.45 | 4.73  | 1.1E-16 | 3.5E-19 | 18534  | phosphoenolpyruvate carboxykinase 1, cytosolic                                                               |
| Pcmd1    | 0.63  | -0.67 | 8.3E-05 | 4.0E-06 | 319263 | protein-L-isospartate (D-aspartate) O-methyltransferase domain containing 1                                  |
| Pcmd2    | 0.57  | -0.81 | 1.5E-05 | 5.4E-07 | 245867 | protein-L-isospartate (D-aspartate) O-methyltransferase domain containing 2                                  |
| Pcnx14   | 2.59  | 1.38  | 3.7E-09 | 4.4E-11 | 67708  | pecanex-like 4                                                                                               |
| Pesk5    | 2.42  | 1.27  | 1.9E-05 | 7.2E-07 | 18552  | proprotein convertase subtilisin/kexin type 5                                                                |
| Pcx      | 0.58  | -0.79 | 1.7E-05 | 6.1E-07 | 18563  | pyruvate carboxylase                                                                                         |
| Pde4a    | 0.44  | -1.20 | 8.2E-07 | 1.9E-08 | 18577  | phosphodiesterase 4A, cAMP specific                                                                          |
| Pde4b    | 0.45  | -1.16 | 1.1E-08 | 1.4E-10 | 18578  | phosphodiesterase 4B, cAMP specific                                                                          |
| Pde4dip  | 0.41  | -1.29 | 4.1E-08 | 6.6E-10 | 83679  | phosphodiesterase 4D interacting protein (myomegalin)                                                        |
| Pdk1     | 1.78  | 0.83  | 1.2E-07 | 2.1E-09 | 228026 | pyruvate dehydrogenase kinase, isoenzyme 1                                                                   |
| Pdk3     | 5.22  | 2.38  | 3.3E-27 | 4.6E-30 | 236900 | pyruvate dehydrogenase kinase, isoenzyme 3                                                                   |
| Pdlim3   | 1.55  | 0.63  | 1.1E-04 | 5.6E-06 | 53318  | PDZ and LIM domain 3                                                                                         |
| Pdpr     | 0.43  | -1.20 | 5.7E-05 | 2.5E-06 | 319518 | pyruvate dehydrogenase phosphatase regulatory subunit                                                        |
| Pds5b    | 0.62  | -0.68 | 8.8E-05 | 4.2E-06 | 100710 | PDS5, regulator of cohesion maintenance, homolog B                                                           |
| Pdzd3    | 3.80  | 1.92  | 3.6E-05 | 1.5E-06 | 170761 | PDZ domain containing 3                                                                                      |
| Pdzrn3   | 0.53  | -0.91 | 8.2E-07 | 1.9E-08 | 55983  | PDZ domain containing RING finger 3                                                                          |
| Pdzrn4   | 3.96  | 1.98  | 3.3E-05 | 1.3E-06 | 239618 | PDZ domain containing RING finger 4                                                                          |
| Peg10    | 18.78 | 4.23  | 3.4E-13 | 1.9E-15 | 170676 | paternally expressed 10                                                                                      |
| Penk     | 2.35  | 1.23  | 1.1E-06 | 2.6E-08 | 18619  | preproenkephalin                                                                                             |
| Perp     | 2.85  | 1.51  | 5.1E-08 | 8.4E-10 | 64058  | PERP, TP53 apoptosis effector                                                                                |
| Pfd      | 2.26  | 1.17  | 1.8E-04 | 9.9E-06 | 18641  | phosphofruktokinase, liver, B-type                                                                           |
| Pfkm     | 0.58  | -0.78 | 1.5E-04 | 7.8E-06 | 18642  | phosphofruktokinase, muscle                                                                                  |
| Pgm2l1   | 0.44  | -1.20 | 9.2E-05 | 4.4E-06 | 70974  | phosphoglucomutase 2-like 1                                                                                  |
| Phka1    | 0.40  | -1.32 | 2.2E-05 | 8.3E-07 | 18679  | phosphorylase kinase alpha 1                                                                                 |
| Phkb     | 0.55  | -0.86 | 3.1E-05 | 1.2E-06 | 102093 | phosphorylase kinase beta                                                                                    |
| Phkg1    | 0.42  | -1.25 | 5.7E-06 | 1.7E-07 | 18682  | phosphorylase kinase gamma 1                                                                                 |
| Pik3r5   | 4.24  | 2.08  | 8.6E-08 | 1.5E-09 | 320207 | phosphoinositide-3-kinase, regulatory subunit 5, p101                                                        |
| Pink1    | 0.57  | -0.81 | 9.7E-07 | 2.3E-08 | 68943  | PTEN induced putative kinase 1                                                                               |
| Pitpnc1  | 0.45  | -1.14 | 2.6E-08 | 3.9E-10 | 71795  | phosphatidylinositol transfer protein, cytoplasmic 1                                                         |
| Pknox2   | 0.59  | -0.75 | 5.3E-06 | 1.6E-07 | 208076 | Pbx/knotted 1 homeobox 2                                                                                     |
| Pla2g7   | 1.85  | 0.89  | 1.2E-08 | 1.6E-10 | 27226  | phospholipase A2, group VII (platelet-activating factor acetylhydrolase, plasma)                             |
| Plib1    | 2.36  | 1.24  | 4.1E-05 | 1.7E-06 | 665270 | phospholipase B1                                                                                             |
| Plec1    | 2.01  | 1.01  | 1.8E-05 | 6.5E-07 | 74055  | phospholipase C, epsilon 1                                                                                   |
| Pleckha6 | 2.74  | 1.45  | 3.5E-06 | 1.0E-07 | 69217  | pleckstrin homology domain containing, family A (phosphoinositide binding specific) member 4                 |
| Pleckha7 | 1.75  | 0.81  | 3.1E-06 | 9.0E-08 | 240753 | pleckstrin homology domain containing, family A member 6                                                     |
| Pleckha7 | 3.41  | 1.77  | 4.8E-05 | 2.1E-06 | 233765 | pleckstrin homology domain containing, family A member 7                                                     |
| Pleckhh3 | 0.55  | -0.86 | 8.3E-05 | 3.9E-06 | 217198 | pleckstrin homology domain containing, family H (with MyTH4 domain) member 3                                 |
| Pleckho1 | 2.89  | 1.53  | 1.4E-12 | 8.8E-15 | 67220  | pleckstrin homology domain containing, family O member 1                                                     |
| Plin1    | 9.45  | 3.24  | 3.6E-13 | 2.1E-15 | 103968 | perilipin 1                                                                                                  |
| Plin5    | 0.46  | -1.12 | 8.8E-07 | 2.1E-08 | 66968  | perilipin 5                                                                                                  |
| Plip     | 2.72  | 1.44  | 1.1E-04 | 5.8E-06 | 67801  | plasma membrane proteolipid                                                                                  |
| Plp1     | 2.78  | 1.47  | 3.1E-07 | 6.3E-09 | 18823  | proteolipid protein (myelin) 1                                                                               |
| Plp2     | 2.40  | 1.26  | 2.3E-05 | 8.7E-07 | 18824  | proteolipid protein 2                                                                                        |
| Plvap    | 2.28  | 1.19  | 4.0E-07 | 8.5E-09 | 84094  | plasmalemma vesicle associated protein                                                                       |
| Plexa4   | 2.21  | 1.14  | 8.6E-08 | 1.5E-09 | 243743 | plexin A4                                                                                                    |
| Plexh2   | 2.43  | 1.28  | 1.4E-05 | 5.0E-07 | 140570 | plexin B2                                                                                                    |
| Pnm1     | 1.59  | 0.66  | 1.7E-04 | 9.4E-06 | 29858  | phosphomannomutase 1                                                                                         |
| Pnp22    | 3.77  | 1.91  | 4.4E-10 | 4.4E-12 | 18858  | peripheral myelin protein 22                                                                                 |
| Pon2     | 2.01  | 1.01  | 3.8E-10 | 3.8E-12 | 330260 | paraoxonase 2                                                                                                |
| Popdc3   | 2.02  | 1.02  | 1.9E-05 | 7.2E-07 | 78977  | popeye domain containing 3                                                                                   |
| Posta    | 2.26  | 1.18  | 6.6E-07 | 1.5E-08 | 50706  | periostin, osteoblast specific factor                                                                        |
| Pou3f1   | 2.39  | 1.26  | 9.5E-05 | 4.6E-06 | 18991  | POU domain, class 3, transcription factor 1                                                                  |
| Ppapdc3  | 0.51  | -0.98 | 7.9E-07 | 1.8E-08 | 227721 | phosphatidic acid phosphatase type 2 domain containing 3                                                     |
| Ppara    | 0.50  | -0.99 | 1.7E-05 | 6.3E-07 | 19013  | peroxisome proliferator activated receptor alpha                                                             |
| Ppflbp1  | 2.05  | 1.03  | 7.3E-07 | 1.7E-08 | 67533  | PTRF interacting protein, binding protein 1 (liprin beta 1)                                                  |
| Ppm1l    | 0.50  | -1.00 | 9.0E-06 | 3.0E-07 | 242083 | protein phosphatase 1 (formerly 2C)-like                                                                     |
| Ppp1r3a  | 0.44  | -1.18 | 3.3E-08 | 5.0E-10 | 140491 | protein phosphatase 1, regulatory (inhibitor) subunit 3A                                                     |
| Pqlc1    | 1.84  | 0.88  | 1.2E-05 | 4.0E-07 | 66943  | PQ loop repeat containing 1                                                                                  |
| Prdm8    | 3.81  | 1.93  | 1.4E-07 | 2.6E-09 | 77630  | PR domain containing 8                                                                                       |
| Prg4     | 2.28  | 1.19  | 9.4E-05 | 4.5E-06 | 96875  | proteoglycan 4 (megakaryocyte stimulating factor, articular superficial zone protein)                        |
| Prima1   | 0.14  | -2.84 | 5.8E-12 | 4.0E-14 | 170952 | proline rich membrane anchor 1                                                                               |
| Prksa2   | 0.51  | -0.97 | 1.2E-07 | 2.1E-09 | 108079 | protein kinase, AMP-activated, alpha 2 catalytic subunit                                                     |
| Prksa3   | 0.50  | -1.01 | 3.3E-05 | 1.3E-06 | 241113 | protein kinase, AMP-activated, gamma 3 non-catalytic subunit                                                 |
| Prkar1a  | 2.67  | 1.42  | 1.1E-08 | 1.4E-10 | 19084  | protein kinase, cAMP dependent regulatory, type I, alpha                                                     |
| Prkar2b  | 5.69  | 2.51  | 6.6E-11 | 5.6E-13 | 19088  | protein kinase, cAMP dependent regulatory, type II beta                                                      |
| Prked    | 2.15  | 1.10  | 3.2E-07 | 6.6E-09 | 18753  | protein kinase C, delta                                                                                      |

|           |       |       |         |         |        |                                                                                                         |
|-----------|-------|-------|---------|---------|--------|---------------------------------------------------------------------------------------------------------|
| Prkeq     | 0.57  | -0.80 | 1.5E-05 | 5.2E-07 | 18761  | protein kinase C, theta                                                                                 |
| Prkez     | 4.29  | 2.10  | 1.1E-06 | 2.8E-08 | 18762  | protein kinase C, zeta                                                                                  |
| Prmt2     | 2.42  | 1.27  | 1.6E-05 | 5.9E-07 | 15468  | protein arginine N-methyltransferase 2                                                                  |
| Prodh     | 2.29  | 1.19  | 7.5E-05 | 3.5E-06 | 19125  | proline dehydrogenase                                                                                   |
| Proser2   | 3.55  | 1.83  | 9.6E-12 | 6.8E-14 | 227545 | proline and serine-rich protein                                                                         |
| Prps13    | 0.60  | -0.74 | 7.1E-06 | 2.3E-07 | 328099 | phosphoribosyl pyrophosphate synthetase I-like 3                                                        |
| Prr32     | 84.71 | 6.40  | 7.6E-72 | 5.0E-76 | 68800  | proline rich 32                                                                                         |
| Prrx2     | 4.69  | 2.23  | 1.0E-10 | 9.2E-13 | 20204  | paired related homeobox 2                                                                               |
| Prss12    | 2.81  | 1.49  | 1.5E-05 | 5.2E-07 | 19142  | protease, serine, 12 neurotrypsin (motopsin)                                                            |
| Prune2    | 6.69  | 2.74  | 1.7E-30 | 1.8E-33 | 353211 | prune homolog 2                                                                                         |
| Prx       | 3.07  | 1.62  | 6.2E-09 | 8.0E-11 | 19153  | periaxin                                                                                                |
| Psmad8    | 1.94  | 0.96  | 2.3E-08 | 3.3E-10 | 57296  | proteasome (prosome, macropain) 26S subunit, non-ATPase, 8                                              |
| Ptar1     | 0.33  | -1.60 | 1.3E-09 | 1.5E-11 | 72351  | protein prenyltransferase alpha subunit repeat containing 1                                             |
| Ptdss1    | 1.69  | 0.76  | 1.9E-06 | 5.0E-08 | 19210  | phosphatidyserine synthase 1                                                                            |
| Ptpdc1    | 1.82  | 0.86  | 1.8E-05 | 6.6E-07 | 218232 | protein tyrosine phosphatase domain containing 1                                                        |
| Ptpn3     | 0.46  | -1.13 | 1.8E-05 | 6.7E-07 | 545622 | protein tyrosine phosphatase, non-receptor type 3                                                       |
| Ptpn4     | 0.39  | -1.37 | 4.7E-10 | 4.7E-12 | 19258  | protein tyrosine phosphatase, non-receptor type 4                                                       |
| Ptpru     | 4.07  | 2.02  | 1.4E-04 | 7.2E-06 | 19273  | protein tyrosine phosphatase, receptor type, U                                                          |
| Pvgl      | 2.36  | 1.24  | 5.0E-05 | 2.2E-06 | 110095 | liver glycogen phosphorylase                                                                            |
| Pygm      | 0.55  | -0.87 | 5.9E-06 | 1.8E-07 | 19309  | muscle glycogen phosphorylase                                                                           |
| Qsox1     | 2.36  | 1.25  | 3.4E-11 | 2.7E-13 | 104009 | quiescin Q6 sulfhydryl oxidase 1                                                                        |
| Rab13     | 3.22  | 1.69  | 2.9E-18 | 7.5E-21 | 68328  | RAB13, member RAS oncogene family                                                                       |
| Rab15     | 6.30  | 2.66  | 8.2E-34 | 6.7E-37 | 104886 | RAB15, member RAS oncogene family                                                                       |
| Rab27b    | 4.57  | 2.19  | 1.7E-08 | 2.4E-10 | 80718  | RAB27b, member RAS oncogene family                                                                      |
| Ralgapa2  | 1.80  | 0.85  | 1.3E-06 | 3.3E-08 | 241694 | Ral GTPase activating protein, alpha subunit 2 (catalytic)                                              |
| Ramp1     | 0.50  | -1.00 | 1.2E-04 | 6.4E-06 | 51801  | receptor (calcitonin) activity modifying protein 1                                                      |
| Rapgef4   | 2.83  | 1.50  | 1.5E-05 | 5.2E-07 | 56508  | Rap guanine nucleotide exchange factor (GEF) 4                                                          |
| Rasd1     | 4.98  | 2.32  | 4.9E-07 | 1.0E-08 | 19416  | RAS, dexamethasone-induced 1                                                                            |
| Rasgrp3   | 0.60  | -0.75 | 3.6E-05 | 1.5E-06 | 240168 | RAS, guanyl releasing protein 3                                                                         |
| Rassf7    | 54.82 | 5.78  | 2.3E-17 | 6.9E-20 | 66985  | RAS association (RalGDS/AF-6) domain family (N-terminal) member 7                                       |
| Rbp4      | 5.74  | 2.52  | 1.9E-09 | 2.2E-11 | 19662  | retinol binding protein 4, plasma                                                                       |
| Reep1     | 0.63  | -0.68 | 6.3E-05 | 2.8E-06 | 52250  | receptor accessory protein 1                                                                            |
| Reep6     | 3.20  | 1.68  | 2.0E-06 | 5.3E-08 | 70335  | receptor accessory protein 6                                                                            |
| Rein      | 2.09  | 1.06  | 3.5E-05 | 1.4E-06 | 19699  | reelin                                                                                                  |
| Retn      | 4.52  | 2.18  | 4.2E-06 | 1.2E-07 | 57264  | resistin                                                                                                |
| Retnla    | 1.67  | 0.74  | 7.2E-05 | 3.3E-06 | 57262  | resistin like alpha                                                                                     |
| Rev3l     | 0.59  | -0.77 | 1.7E-05 | 6.2E-07 | 19714  | REV3-like, catalytic subunit of DNA polymerase zeta RAD54 like                                          |
| Rgcc      | 5.14  | 2.36  | 7.3E-25 | 1.2E-27 | 66214  | regulator of cell cycle                                                                                 |
| Rgs11     | 8.00  | 3.00  | 1.3E-14 | 6.0E-17 | 50782  | regulator of G-protein signaling 11                                                                     |
| Rgs12     | 3.29  | 1.72  | 2.4E-05 | 9.3E-07 | 71729  | regulator of G-protein signaling 12                                                                     |
| Rgs5      | 0.47  | -1.08 | 2.3E-06 | 6.3E-08 | 19737  | regulator of G-protein signaling 5                                                                      |
| Rhod      | 3.74  | 1.90  | 3.8E-05 | 1.6E-06 | 11854  | ras homolog gene family, member D                                                                       |
| Rhpn2     | 4.58  | 2.20  | 1.9E-16 | 6.5E-19 | 52428  | rhopilin, Rho GTPase binding protein 2                                                                  |
| Rian      | 5.20  | 2.38  | 3.0E-39 | 1.9E-42 | 75745  | RNA imprinted and accumulated in nucleus                                                                |
| Rin1      | 5.60  | 2.48  | 2.6E-08 | 3.9E-10 | 225870 | Ras and Rab interactor 1                                                                                |
| Rmi2      | 0.20  | -2.32 | 8.4E-06 | 2.7E-07 | 223970 | RM12, RecQ mediated genome instability 2, homolog                                                       |
| Rnf217    | 2.08  | 1.05  | 6.1E-06 | 1.9E-07 | 268291 | ring finger protein 217                                                                                 |
| Rora      | 0.38  | -1.40 | 4.0E-05 | 1.7E-06 | 19883  | RAR-related orphan receptor alpha                                                                       |
| Rph3al    | 0.48  | -1.04 | 9.6E-05 | 4.7E-06 | 380714 | rabphilin 3A-like (without C2 domains)                                                                  |
| Rpl3l     | 0.52  | -0.95 | 5.7E-05 | 2.5E-06 | 66211  | ribosomal protein L3-like                                                                               |
| Rps2      | 1.64  | 0.71  | 1.3E-04 | 6.5E-06 | 16898  | ribosomal protein S2                                                                                    |
| Rps20     | 1.77  | 0.82  | 1.1E-04 | 5.4E-06 | 67427  | ribosomal protein S20                                                                                   |
| Rps6ka2   | 0.56  | -0.84 | 6.3E-06 | 2.0E-07 | 20112  | ribosomal protein S6 kinase, polypeptide 2                                                              |
| Rps6ka5   | 0.50  | -0.99 | 6.2E-07 | 1.4E-08 | 73086  | ribosomal protein S6 kinase, polypeptide 5                                                              |
| Rrad      | 5.44  | 2.44  | 2.3E-07 | 4.6E-09 | 56437  | Ras-related associated with diabetes                                                                    |
| Rras      | 3.32  | 1.73  | 5.9E-13 | 3.5E-15 | 20130  | Harvey rat sarcoma oncogene, subgroup R                                                                 |
| Rras2     | 2.31  | 1.21  | 4.2E-07 | 8.9E-09 | 66922  | related RAS viral (r-ras) oncogene homolog 2                                                            |
| Rrm1      | 0.56  | -0.83 | 7.8E-05 | 3.7E-06 | 20133  | ribonucleotide reductase M1                                                                             |
| Rspo3     | 3.44  | 1.78  | 2.2E-07 | 4.3E-09 | 72780  | R-spondin 3 homolog                                                                                     |
| Rtl1      | 5.74  | 2.52  | 1.4E-08 | 1.9E-10 | 353326 | retrotransposon-like 1                                                                                  |
| Rtn2      | 0.57  | -0.80 | 3.8E-05 | 1.6E-06 | 20167  | reticulum 2 (Z-band associated protein)                                                                 |
| Rtnx1     | 7.30  | 2.87  | 4.0E-10 | 3.9E-12 | 12394  | runt related transcription factor 1                                                                     |
| Ryr1      | 0.40  | -1.33 | 1.4E-15 | 5.5E-18 | 20190  | ryanodine receptor 1, skeletal muscle                                                                   |
| Ryr3      | 6.82  | 2.77  | 9.0E-12 | 6.3E-14 | 20192  | ryanodine receptor 3                                                                                    |
| S100a13   | 2.00  | 1.00  | 8.2E-05 | 3.8E-06 | 20196  | S100 calcium binding protein A13                                                                        |
| S100a4    | 14.78 | 3.89  | 1.8E-32 | 1.7E-35 | 20198  | S100 calcium binding protein A4                                                                         |
| S100a6    | 2.65  | 1.41  | 8.0E-10 | 8.4E-12 | 20200  | S100 calcium binding protein A6 (calcylin)                                                              |
| S100b     | 3.01  | 1.59  | 7.3E-07 | 1.7E-08 | 20203  | S100 protein, beta polypeptide, neural                                                                  |
| Sacs      | 0.59  | -0.77 | 2.1E-05 | 8.1E-07 | 50720  | sacsin                                                                                                  |
| Sap30     | 1.90  | 0.93  | 3.2E-05 | 1.3E-06 | 60406  | sin3 associated polypeptide                                                                             |
| Sat1      | 2.37  | 1.25  | 8.1E-18 | 2.2E-20 | 20229  | spermidine/spermine N1-acetyl transferase 1                                                             |
| Scamp5    | 1.92  | 0.94  | 6.8E-06 | 2.1E-07 | 56807  | secretory carrier membrane protein 5                                                                    |
| Scand1    | 2.17  | 1.12  | 2.4E-05 | 9.4E-07 | 19018  | SCAN domain-containing 1                                                                                |
| Scarf2    | 1.89  | 0.92  | 9.0E-06 | 3.0E-07 | 224024 | scavenger receptor class F, member 2                                                                    |
| Scd1      | 2.75  | 1.46  | 1.2E-13 | 6.3E-16 | 20249  | stearoyl-Coenzyme A desaturase 1                                                                        |
| Scd2      | 2.23  | 1.16  | 1.2E-07 | 2.1E-09 | 20250  | stearoyl-Coenzyme A desaturase 2                                                                        |
| Scg3      | 3.74  | 1.90  | 1.6E-06 | 4.0E-08 | 20255  | secretogranin III                                                                                       |
| Scn2a1    | 23.75 | 4.57  | 6.5E-46 | 2.1E-49 | 110876 | sodium channel, voltage-gated, type II, alpha 1                                                         |
| Scn4a     | 0.51  | -0.96 | 1.5E-09 | 1.7E-11 | 110880 | sodium channel, voltage-gated, type IV, alpha                                                           |
| Scn4b     | 0.55  | -0.86 | 7.2E-05 | 3.3E-06 | 399548 | sodium channel, type IV, beta                                                                           |
| Scn5a     | 8.13  | 3.02  | 1.5E-05 | 5.1E-07 | 20271  | sodium channel, voltage-gated, type V, alpha                                                            |
| Scubc2    | 3.96  | 1.99  | 4.6E-08 | 7.5E-10 | 56788  | signal peptide, CUB domain, EGF-like 2                                                                  |
| Scx       | 3.05  | 1.61  | 8.4E-10 | 8.9E-12 | 20289  | scleraxis                                                                                               |
| Sdc4      | 1.80  | 0.85  | 6.3E-06 | 1.9E-07 | 20971  | syndecan 4                                                                                              |
| Sdha      | 0.56  | -0.84 | 4.0E-07 | 8.3E-09 | 66945  | succinate dehydrogenase complex, subunit A, flavoprotein (Fp)                                           |
| Sec14f5   | 0.34  | -1.56 | 4.5E-07 | 9.5E-09 | 665119 | SEC14-like 5                                                                                            |
| Sec31b    | 0.38  | -1.40 | 8.7E-05 | 4.2E-06 | 240667 | Sec31 homolog B                                                                                         |
| Sema3b    | 2.42  | 1.28  | 2.1E-07 | 4.0E-09 | 20347  | sema domain, immunoglobulin domain (Ig), short basic domain, secreted, (semaphorin) 3B                  |
| Sema6c    | 0.52  | -0.93 | 3.7E-08 | 5.9E-10 | 20360  | sema domain, transmembrane domain (TM), and cytoplasmic domain, (semaphorin) 6C                         |
| Sept3     | 4.18  | 2.06  | 3.3E-09 | 4.0E-11 | 24050  | septin 3                                                                                                |
| Sept5     | 2.68  | 1.42  | 1.0E-05 | 3.4E-07 | 18951  | septin 5                                                                                                |
| Serf1     | 2.86  | 1.52  | 2.1E-06 | 5.7E-08 | 20365  | small EDRK-rich factor 1                                                                                |
| Serpina3c | 6.64  | 2.73  | 7.3E-09 | 9.4E-11 | 16625  | serine (or cysteine) peptidase inhibitor, clade A, member 3C                                            |
| Serpina3n | 11.35 | 3.50  | 1.1E-04 | 5.7E-06 | 20716  | serine (or cysteine) peptidase inhibitor, clade A, member 3N                                            |
| Serpinb1a | 5.66  | 2.50  | 2.2E-24 | 3.6E-27 | 66232  | serine (or cysteine) peptidase inhibitor, clade B, member 1a                                            |
| Serpinb1c | 3.52  | 1.81  | 1.3E-05 | 4.6E-07 | 380839 | serine (or cysteine) peptidase inhibitor, clade B, member 1c                                            |
| Serpinb6a | 4.13  | 2.05  | 3.4E-30 | 3.7E-33 | 20719  | serine (or cysteine) peptidase inhibitor, clade B, member 6a                                            |
| Serpine1  | 2.61  | 1.39  | 2.9E-05 | 1.2E-06 | 18787  | serine (or cysteine) peptidase inhibitor, clade E, member 1                                             |
| Serpine2  | 0.57  | -0.81 | 1.4E-06 | 3.5E-08 | 20720  | serine (or cysteine) peptidase inhibitor, clade E, member 2                                             |
| Sfn       | 3.43  | 1.78  | 6.4E-07 | 1.4E-08 | 55948  | stratifin                                                                                               |
| Sgcb      | 0.61  | -0.71 | 2.4E-06 | 6.6E-08 | 24051  | sareoglycan, beta (dystrophin-associated glycoprotein)                                                  |
| Sgpp1     | 0.64  | -0.64 | 1.5E-04 | 7.7E-06 | 81535  | sphingosine-1-phosphate phosphatase 1                                                                   |
| Sh3bp2    | 2.82  | 1.50  | 7.0E-07 | 1.6E-08 | 24055  | SH3-domain binding protein 2                                                                            |
| Shbg      | 3.65  | 1.87  | 6.8E-06 | 2.2E-07 | 20415  | sex hormone binding globulin                                                                            |
| Shc4      | 3.34  | 1.74  | 5.2E-07 | 1.1E-08 | 271849 | SHC (Src homology 2 domain containing) family, member 4                                                 |
| Shisa3    | 3.07  | 1.62  | 3.3E-08 | 5.0E-10 | 330096 | shisa homolog 3                                                                                         |
| Shml1     | 0.53  | -0.93 | 1.4E-04 | 7.1E-06 | 20425  | serine hydroxymethyltransferase 1 (soluble)                                                             |
| Shph      | 0.41  | -1.28 | 1.1E-07 | 1.9E-09 | 268281 | SNF2 histone linker PHD RING helicase                                                                   |
| Sik1      | 1.97  | 0.98  | 1.4E-04 | 7.3E-06 | 17691  | salt inducible kinase 1                                                                                 |
| Sim1      | 0.30  | -1.72 | 9.3E-07 | 2.2E-08 | 20464  | single-minded homolog 1                                                                                 |
| Sirpa     | 1.95  | 0.96  | 5.4E-05 | 2.3E-06 | 19261  | signal-regulatory protein alpha                                                                         |
| Six4      | 0.56  | -0.83 | 1.5E-05 | 5.3E-07 | 20474  | sine oculis-related homeobox 4                                                                          |
| Skap2     | 1.82  | 0.86  | 3.3E-05 | 1.3E-06 | 54353  | src family associated phosphoprotein 2                                                                  |
| Ski       | 1.52  | 0.61  | 1.1E-04 | 5.6E-06 | 20481  | ski sarcoma viral oncogene homolog                                                                      |
| Slc16a10  | 0.49  | -1.03 | 1.8E-06 | 4.8E-08 | 72472  | solute carrier family 16 (monocarboxylic acid transporters), member 10                                  |
| Slc1a1    | 2.34  | 1.22  | 2.0E-08 | 2.8E-10 | 20510  | solute carrier family 1 (neuronal/epithelial high affinity glutamate transporter, system Xag), member 1 |
| Slc1a5    | 2.57  | 1.36  | 2.8E-10 | 2.7E-12 | 20514  | solute carrier family 1 (neutral amino acid transporter), member 5                                      |
| Slc22a23  | 0.58  | -0.78 | 1.1E-04 | 5.3E-06 | 73102  | solute carrier family 22, member 23                                                                     |
| Slc24a2   | 4.62  | 2.21  | 6.9E-05 | 3.1E-06 | 76376  | solute carrier family 24 (sodium/potassium/calcium exchanger), member 2                                 |
| Slc25a12  | 0.64  | -0.64 | 1.6E-04 | 8.6E-06 | 78830  | solute carrier family 25 (mitochondrial carrier, Aralar), member 12                                     |
| Slc25a24  | 4.51  | 2.17  | 2.5E-07 | 4.8E-09 | 229731 | solute carrier family 25 (mitochondrial carrier, phosphate carrier), member 24                          |
| Slc2a12   | 0.45  | -1.16 | 1.4E-07 | 2.7E-09 | 353169 | solute carrier family 2 (facilitated glucose transporter), member 12                                    |
| Slc35f5   | 1.91  | 0.93  | 2.2E-05 | 8.3E-07 | 74150  | solute carrier family 35, member F5                                                                     |

|           |                            |       |         |         |           |                                                                                 |
|-----------|----------------------------|-------|---------|---------|-----------|---------------------------------------------------------------------------------|
| Slc36a2   | 7.38                       | 2.88  | 1.3E-11 | 9.9E-14 | 246049    | solute carrier family 36 (proton/amino acid symporter), member 2                |
| Slc37a2   | 2.85                       | 1.51  | 1.7E-05 | 6.3E-07 | 56857     | solute carrier family 37 (glycerol-3-phosphate transporter), member 2           |
| Slc37a4   | 0.57                       | -0.80 | 7.1E-05 | 3.3E-06 | 14385     | solute carrier family 37 (glucose-6-phosphate transporter), member 4            |
| Slc40a1   | 0.30                       | -1.74 | 3.2E-11 | 2.6E-13 | 53945     | solute carrier family 40 (iron-regulated transporter), member 1                 |
| Slc43a1   | 0.48                       | -1.06 | 7.5E-05 | 3.5E-06 | 72401     | solute carrier family 43, member 1                                              |
| Slc4a3    | 2.76                       | 1.47  | 4.7E-06 | 1.4E-07 | 20536     | solute carrier family 4 (anion exchanger), member 3                             |
| Slc6a17   | 4.86                       | 2.28  | 3.2E-06 | 9.1E-08 | 229706    | solute carrier family 6 (neurotransmitter transporter), member 17               |
| Slc7a10   | 3.10                       | 1.63  | 3.4E-06 | 9.8E-08 | 53896     | solute carrier family 7 (cationic amino acid transporter, y+ system), member 10 |
| Sln       | 51.97                      | 5.70  | 3.9E-46 | 1.0E-49 | 66402     | sarcophilin                                                                     |
| Smad3     | 0.53                       | -0.92 | 8.0E-06 | 2.6E-07 | 17127     | SMAD family member 3                                                            |
| Smcr8     | 0.49                       | -1.02 | 1.8E-04 | 9.8E-06 | 237782    | Smith-Magenis syndrome chromosome region, candidate 8 homolog                   |
| Smim3     | 3.66                       | 1.87  | 1.6E-11 | 1.2E-13 | 106878    | small integral membrane protein 3                                               |
| Smoc1     | 5.61                       | 2.49  | 1.3E-06 | 3.1E-08 | 64075     | SPARC related modular calcium binding 1                                         |
| Smpx      | 1.99                       | 0.99  | 9.7E-10 | 1.0E-11 | 66106     | small muscle protein, X-linked                                                  |
| Sms       | 1.87                       | 0.90  | 4.9E-08 | 8.0E-10 | 20603     | spermene synthase                                                               |
| Sneg      | 3.51                       | 1.81  | 6.7E-07 | 1.5E-08 | 20618     | synuclein, gamma                                                                |
| Snhg5     | 2.51                       | 1.33  | 9.8E-08 | 1.7E-09 | 72655     | small nucleolar RNA host gene 5                                                 |
| Snx10     | 2.07                       | 1.05  | 6.7E-08 | 1.1E-09 | 71982     | sorting nexin 10                                                                |
| Sobp      | 0.54                       | -0.90 | 7.1E-07 | 1.6E-08 | 109205    | sine oculis-binding protein homolog                                             |
| Sod2      | 0.59                       | -0.75 | 2.9E-05 | 1.1E-06 | 20656     | superoxide dismutase 2, mitochondrial                                           |
| Sod3      | 2.95                       | 1.56  | 3.9E-18 | 1.0E-20 | 20657     | superoxide dismutase 3, extracellular                                           |
| Son       | 0.53                       | -0.93 | 1.4E-06 | 3.5E-08 | 20658     | Son DNA binding protein                                                         |
| Sorbs2    | 3.03                       | 1.60  | 4.7E-27 | 6.9E-30 | 234214    | sorbin and SH3 domain containing 2                                              |
| Sorbs3    | 1.60                       | 0.68  | 1.1E-04 | 5.6E-06 | 20410     | sorbin and SH3 domain containing 3                                              |
| Sord      | 3.08                       | 1.62  | 1.1E-27 | 1.5E-30 | 20322     | sorbitol dehydrogenase                                                          |
| Sox11     | 8.46                       | 3.08  | 2.9E-05 | 1.2E-06 | 20666     | SRY-box containing gene 11                                                      |
| Sox6      | 0.61                       | -0.72 | 1.0E-04 | 4.9E-06 | 20679     | SRY-box containing gene 6                                                       |
| Sp4       | 0.44                       | -1.18 | 2.9E-06 | 8.1E-08 | 20688     | trans-acting transcription factor 4                                             |
| Spin1     | see Supplementary Table 1e |       |         |         |           | spinidin 1                                                                      |
| Spin2     | 2.66                       | 1.41  | 2.5E-05 | 9.6E-07 | 20733     | serine protease inhibitor, Kunitz type 2                                        |
| Spoc2     | 2.27                       | 1.19  | 9.9E-05 | 4.9E-06 | 94214     | spare/osteonectin, cvcvc and kazal-like domains proteoglycan 2                  |
| Spp1      | 17.18                      | 4.10  | 1.7E-15 | 6.8E-18 | 20750     | secreted phosphoprotein 1                                                       |
| Spry3     | 4.27                       | 2.09  | 4.1E-15 | 1.7E-17 | 101809    | sprouty-related, EVH1 domain containing 3                                       |
| Spsb2     | 2.50                       | 1.32  | 1.0E-05 | 3.5E-07 | 14794     | sp1/ryanodine receptor domain and SOCS box containing 2                         |
| Spsb4     | 2.25                       | 1.17  | 5.9E-05 | 2.6E-06 | 211949    | sp1/ryanodine receptor domain and SOCS box containing 4                         |
| Sre       | 2.33                       | 1.22  | 1.4E-07 | 2.6E-09 | 20779     | Rous sarcoma oncogene                                                           |
| Srgap3    | 4.56                       | 2.19  | 7.3E-15 | 3.2E-17 | 259302    | SLIT-ROBO Rho GTPase activating protein 3                                       |
| Srxn1     | 1.72                       | 0.78  | 1.7E-06 | 4.5E-08 | 76550     | sulfiredoxin 1 homolog                                                          |
| Sl3gal2   | 0.57                       | -0.81 | 3.8E-08 | 6.0E-10 | 20444     | ST3 beta-galactoside alpha-2,3-sialyltransferase 2                              |
| Stac3     | 0.52                       | -0.93 | 2.6E-07 | 5.2E-09 | 237611    | SH3 and cysteine rich domain 3                                                  |
| Stard10   | 0.45                       | -1.16 | 3.5E-08 | 5.4E-10 | 56018     | START domain containing 10                                                      |
| Stard7    | 0.62                       | -0.68 | 9.5E-06 | 3.2E-07 | 99138     | START domain containing 7                                                       |
| Stat5b    | 0.55                       | -0.85 | 1.8E-04 | 9.6E-06 | 20851     | signal transducer and activator of transcription 5B                             |
| Stau2     | 2.05                       | 1.03  | 4.6E-09 | 5.7E-11 | 29819     | staufen (RNA binding protein) homolog 2                                         |
| Stbd1     | 2.38                       | 1.25  | 5.1E-12 | 3.4E-14 | 52331     | starch binding domain 1                                                         |
| Stmn4     | 2.71                       | 1.44  | 1.2E-08 | 1.7E-10 | 56471     | stathmin-like 4                                                                 |
| Stom      | 2.08                       | 1.05  | 1.1E-08 | 1.5E-10 | 13830     | stomatin                                                                        |
| Strada    | 1.60                       | 0.68  | 7.7E-05 | 3.6E-06 | 72149     | STE20-related kinase adaptor alpha                                              |
| Strbp     | 0.53                       | -0.91 | 1.2E-04 | 6.1E-06 | 20744     | spermatid perinuclear RNA binding protein                                       |
| Sulf2     | 2.78                       | 1.47  | 9.2E-11 | 8.1E-13 | 72043     | sulfatase 2                                                                     |
| Sumf2     | 0.47                       | -1.07 | 8.1E-05 | 3.8E-06 | 67902     | sulfatase modifying factor 2                                                    |
| Sun2      | 0.59                       | -0.76 | 1.3E-06 | 3.4E-08 | 223697    | Sad1 and UNC84 domain containing 2                                              |
| Supt3     | 2.26                       | 1.18  | 6.4E-08 | 1.1E-09 | 109115    | suppressor of Ty 3                                                              |
| Synm      | 0.51                       | -0.98 | 3.9E-06 | 1.2E-07 | 233335    | synemin, intermediate filament protein                                          |
| Syt11     | 2.02                       | 1.02  | 4.5E-05 | 1.9E-06 | 229521    | synaptotagmin XI                                                                |
| Tbctd1    | 0.58                       | -0.79 | 7.8E-05 | 3.6E-06 | 57915     | TBC1 domain family, member 1                                                    |
| Tbctd10b  | 1.68                       | 0.75  | 5.5E-05 | 2.4E-06 | 68449     | TBC1 domain family, member 10b                                                  |
| Tbkbp1    | 1.84                       | 0.88  | 2.7E-06 | 7.5E-08 | 73174     | TBK1 binding protein 1                                                          |
| Tcea3     | 0.49                       | -1.02 | 5.7E-07 | 1.2E-08 | 21401     | transcription elongation factor A (SII), 3                                      |
| Tceal5    | 2.39                       | 1.26  | 3.3E-15 | 1.3E-17 | 331532    | transcription elongation factor A (SII)-like 5                                  |
| Tceal7    | 8.98                       | 3.17  | 9.7E-57 | 9.5E-61 | 100040972 | transcription elongation factor A (SII)-like 7                                  |
| Tdrd9     | 19.95                      | 4.32  | 1.0E-20 | 2.0E-23 | 74691     | tudor domain containing 9                                                       |
| Tdrp      | 1.94                       | 0.95  | 1.1E-04 | 5.8E-06 | 72148     | testis development related protein                                              |
| Tec       | 2.55                       | 1.35  | 5.2E-07 | 1.1E-08 | 21682     | tec protein tyrosine kinase                                                     |
| Teer      | 0.61                       | -0.71 | 1.8E-06 | 4.6E-08 | 106529    | trans-2,3-enoyl-CoA reductase                                                   |
| Tenn3     | 0.46                       | -1.12 | 2.0E-07 | 3.8E-09 | 23965     | teneurin transmembrane protein 3                                                |
| Tet1      | 0.46                       | -1.13 | 7.5E-06 | 2.4E-07 | 52463     | tet methylcytosine dioxygenase 1                                                |
| Tgfb1     | 1.94                       | 0.95  | 1.1E-05 | 3.7E-07 | 21810     | transforming growth factor, beta induced                                        |
| Tgm2      | 2.41                       | 1.27  | 2.1E-18 | 5.4E-21 | 21817     | transglutaminase 2, C polypeptide                                               |
| Thada     | 0.57                       | -0.80 | 1.2E-04 | 6.4E-06 | 240174    | thyroid adenoma associated                                                      |
| Thbs1     | 2.16                       | 1.11  | 1.7E-05 | 6.3E-07 | 21825     | thrombospondin 1                                                                |
| Thbs4     | 2.75                       | 1.46  | 5.6E-07 | 1.2E-08 | 21828     | thrombospondin 4                                                                |
| Thrb      | 0.35                       | -1.53 | 9.2E-15 | 4.0E-17 | 21834     | thyroid hormone receptor beta                                                   |
| Thsd7b    | 5.07                       | 2.34  | 7.5E-12 | 5.2E-14 | 210417    | thrombospondin, type 1, domain containing 7B                                    |
| Tiam2     | 3.18                       | 1.67  | 2.5E-08 | 3.7E-10 | 24001     | T cell lymphoma invasion and metastasis 2                                       |
| Tigd4     | 2.27                       | 1.19  | 6.4E-06 | 2.0E-07 | 403175    | tigger transposable element derived 4                                           |
| Timp1     | 9.65                       | 3.27  | 6.2E-07 | 1.4E-08 | 21857     | tissue inhibitor of metalloproteinase 1                                         |
| Tlcd2     | 0.48                       | -1.07 | 3.2E-05 | 1.3E-06 | 380712    | TLC domain containing 2                                                         |
| Tlc3      | 1.83                       | 0.87  | 5.9E-06 | 1.8E-07 | 21887     | transducin-like enhancer of split 3, homolog of Drosophila E(spl)               |
| Tln2      | 0.57                       | -0.81 | 2.4E-05 | 9.3E-07 | 70549     | talin 2                                                                         |
| Tlr4      | 2.52                       | 1.33  | 2.3E-07 | 4.4E-09 | 21898     | toll-like receptor 4                                                            |
| Tmbim1    | 1.80                       | 0.84  | 6.3E-06 | 2.0E-07 | 69660     | transmembrane BAX inhibitor motif containing 1                                  |
| Tmem100   | 0.53                       | -0.92 | 7.7E-06 | 2.5E-07 | 67888     | transmembrane protein 100                                                       |
| Tmem109   | 0.59                       | -0.77 | 5.8E-06 | 1.8E-07 | 68539     | transmembrane protein 109                                                       |
| Tmem116   | 3.77                       | 1.91  | 2.2E-07 | 4.3E-09 | 77462     | transmembrane protein 116                                                       |
| Tmem132a  | 2.99                       | 1.58  | 2.4E-08 | 3.5E-10 | 98170     | transmembrane protein 132A                                                      |
| Tmem143   | 0.56                       | -0.84 | 5.8E-05 | 2.6E-06 | 70209     | transmembrane protein 143                                                       |
| Tmem158   | 3.71                       | 1.89  | 7.6E-06 | 2.5E-07 | 72309     | transmembrane protein 158                                                       |
| Tmem159   | 1.77                       | 0.82  | 5.1E-05 | 2.2E-06 | 233806    | transmembrane protein 159                                                       |
| Tmem176b  | 2.07                       | 1.05  | 4.2E-09 | 5.1E-11 | 65963     | transmembrane protein 176B                                                      |
| Tmem189   | 2.09                       | 1.07  | 1.5E-07 | 2.9E-09 | 407243    | transmembrane protein 189                                                       |
| Tmem205   | 1.90                       | 0.93  | 3.4E-05 | 1.4E-06 | 235043    | transmembrane protein 205                                                       |
| Tmem233   | 0.60                       | -0.74 | 2.3E-05 | 8.9E-07 | 545798    | transmembrane protein 233                                                       |
| Tmem38b   | 1.88                       | 0.91  | 4.4E-06 | 1.3E-07 | 52076     | transmembrane protein 38B                                                       |
| Tmem53    | 3.55                       | 1.83  | 8.5E-11 | 7.4E-13 | 68777     | transmembrane protein 53                                                        |
| Tmem62    | 3.03                       | 1.60  | 3.8E-14 | 1.8E-16 | 96957     | transmembrane protein 62                                                        |
| Tmem8c    | 7.32                       | 2.87  | 1.1E-06 | 2.7E-08 | 66139     | transmembrane protein 8C                                                        |
| Tmem9     | 0.72                       | 0.78  | 8.2E-05 | 3.9E-06 | 66241     | transmembrane protein 9                                                         |
| Tmod4     | 1.49                       | -1.02 | 4.6E-08 | 7.5E-10 | 50874     | tropomodulin 4                                                                  |
| Tnc       | 2.31                       | 1.21  | 5.4E-05 | 2.4E-06 | 21923     | tenascin C                                                                      |
| Tnfrsf12a | 2.41                       | 1.27  | 3.9E-07 | 8.2E-09 | 27279     | tumor necrosis factor receptor superfamily, member 12a                          |
| Tnfrsf23  | 3.15                       | 1.66  | 5.2E-10 | 5.3E-12 | 79201     | tumor necrosis factor receptor superfamily, member 23                           |
| Tnip2     | 1.97                       | 0.98  | 3.2E-05 | 1.3E-06 | 231130    | TNFAIP3 interacting protein 2                                                   |
| Tnnc1     | 14.54                      | 3.86  | 2.9E-11 | 2.3E-13 | 21924     | troponin C, cardiac/slow skeletal                                               |
| Tnni1     | 14.97                      | 3.90  | 3.0E-12 | 1.9E-14 | 21952     | troponin I, skeletal, slow 1                                                    |
| Tnni2     | 5.44                       | 2.44  | 1.7E-07 | 3.2E-09 | 21955     | troponin T1, skeletal, slow                                                     |
| Tnni3     | 12.15                      | 3.60  | 1.0E-09 | 1.1E-11 | 21956     | troponin T2, cardiac                                                            |
| Tnrx18    | 0.59                       | -0.77 | 1.2E-04 | 6.2E-06 | 231861    | trinucleotide repeat containing 18                                              |
| Tnrx6b    | 0.62                       | -0.68 | 1.3E-04 | 6.8E-06 | 213988    | trinucleotide repeat containing 6b                                              |
| Tpds211   | 1.83                       | 0.87  | 3.9E-08 | 6.3E-10 | 21987     | tumor protein D52-like 1                                                        |
| Tppp3     | 2.10                       | 1.07  | 1.0E-08 | 1.4E-10 | 67971     | tubulin polymerization-promoting protein family member 3                        |
| Tpra      | 2.21                       | 1.14  | 7.3E-05 | 3.4E-06 | 97031     | taperin                                                                         |
| Tpt1      | 1.87                       | 0.90  | 7.0E-07 | 1.6E-08 | 22070     | tumor protein, translationally-controlled 1                                     |
| Traf3     | 2.18                       | 1.12  | 3.3E-08 | 5.1E-10 | 22031     | TNF receptor-associated factor 3                                                |
| Tram111   | 8.35                       | 3.06  | 1.4E-10 | 1.3E-12 | 229801    | translocation associated membrane protein 1-like 1                              |
| Trap1     | 0.64                       | -0.65 | 1.0E-04 | 5.2E-06 | 68015     | TNF receptor-associated protein 1                                               |
| Trim47    | 2.04                       | 1.03  | 4.7E-08 | 7.6E-10 | 217333    | tripartite motif-containing 47                                                  |
| Trim55    | 0.60                       | -0.75 | 1.6E-05 | 5.9E-07 | 381485    | tripartite motif-containing 55                                                  |
| Trip11    | 0.43                       | -1.23 | 3.9E-06 | 1.1E-07 | 109181    | thyroid hormone receptor interactor 11                                          |
| Trp63     | 4.38                       | 2.13  | 3.3E-23 | 5.9E-26 | 22061     | transformation related protein 63                                               |
| Tsc22d1   | 2.26                       | 1.18  | 2.9E-06 | 8.2E-08 | 21807     | TSC22 domain family, member 1                                                   |
| Tsc22d4   | 1.61                       | 0.69  | 3.4E-05 | 1.4E-06 | 78829     | TSC22 domain family, member 4                                                   |
| Tspan17   | 2.03                       | 1.02  | 6.6E-07 | 1.5E-08 | 74257     | tetraspanin 17                                                                  |

|           |       |       |         |         |        |                                                       |
|-----------|-------|-------|---------|---------|--------|-------------------------------------------------------|
| Tspan5    | 2.71  | 1.44  | 2.5E-08 | 3.7E-10 | 56224  | tetraspanin 5                                         |
| Tspan9    | 4.92  | 2.30  | 3.6E-28 | 4.6E-31 | 109246 | tetraspanin 9                                         |
| Tspo      | 2.05  | 1.04  | 2.7E-08 | 4.0E-10 | 12257  | translocator protein                                  |
| Ttc37     | 0.55  | -0.85 | 3.5E-06 | 1.0E-07 | 218343 | tetratricopeptide repeat domain 37                    |
| Ttc39a    | 5.08  | 2.34  | 2.5E-10 | 2.4E-12 | 230603 | tetratricopeptide repeat domain 39A                   |
| Ttc39c    | 2.29  | 1.19  | 8.2E-06 | 2.7E-07 | 72747  | tetratricopeptide repeat domain 39C                   |
| Ttc9      | 5.91  | 2.56  | 6.7E-15 | 2.9E-17 | 69480  | tetratricopeptide repeat domain 9                     |
| Till12    | 1.80  | 0.85  | 2.1E-05 | 7.9E-07 | 223723 | tubulin tyrosine ligase-like family, member 12        |
| Ttn       | 0.54  | -0.89 | 3.0E-07 | 6.1E-09 | 22138  | titin                                                 |
| Tuba4a    | 0.58  | -0.80 | 6.1E-06 | 1.9E-07 | 22145  | tubulin, alpha 4A                                     |
| Tubb6     | 3.16  | 1.66  | 2.7E-07 | 5.4E-09 | 67951  | tubulin, beta 6 class V                               |
| Uap1l1    | 2.25  | 1.17  | 4.5E-07 | 9.7E-09 | 227620 | UDP-N-acetylglucosamine pyrophosphorylase 1-like 1    |
| Ubc3a     | 0.52  | -0.96 | 2.8E-07 | 5.7E-09 | 22215  | ubiquitin protein ligase E3A                          |
| Ubxn2a    | 0.55  | -0.86 | 6.6E-07 | 1.5E-08 | 217379 | UBX domain protein 2A                                 |
| Uchl1     | 22.23 | 4.47  | 2.1E-32 | 2.0E-35 | 22223  | ubiquitin carboxy-terminal hydrolase L1               |
| Uck2      | 3.28  | 1.19  | 4.2E-05 | 1.8E-06 | 80914  | uridine-cytidine kinase 2                             |
| Ufsp1     | 2.23  | 1.69  | 1.1E-09 | 1.2E-11 | 70240  | UFM1-specific peptidase 1                             |
| Ugt8a     | 4.38  | 2.13  | 4.4E-06 | 1.3E-07 | 22239  | UDP galactosyltransferase 8A                          |
| Uhrf1bp1l | 1.93  | 0.95  | 1.3E-07 | 2.4E-09 | 75089  | UHRF1 (ICBP90) binding protein 1-like                 |
| Unc45b    | 0.60  | -0.74 | 8.6E-05 | 4.1E-06 | 217012 | unc-45 homolog B                                      |
| Ung       | 0.43  | -1.23 | 1.7E-07 | 3.3E-09 | 22256  | uracil DNA glycosylase                                |
| Uqcr2     | 0.61  | -0.72 | 6.0E-05 | 2.7E-06 | 67003  | ubiquinol cytochrome c reductase core protein 2       |
| Usp20     | 1.71  | 0.77  | 2.2E-06 | 5.8E-08 | 74270  | ubiquitin specific peptidase 20                       |
| Usp45     | 0.56  | -0.84 | 6.1E-05 | 2.7E-06 | 77593  | ubiquitin specific peptidase 45                       |
| Usp9x     | 0.59  | -0.76 | 1.3E-04 | 7.0E-06 | 22284  | ubiquitin specific peptidase 9, X chromosome          |
| Utp1l1    | 1.61  | 0.69  | 1.3E-04 | 6.5E-06 | 67205  | UTP11-like, U3 small nucleolar ribonucleoprotein      |
| Vash2     | 3.62  | 1.85  | 2.1E-10 | 1.9E-12 | 226841 | vasohibin 2                                           |
| Vim       | 1.84  | 0.88  | 2.7E-05 | 1.1E-06 | 22352  | vimentin                                              |
| Vit       | 3.71  | 1.89  | 3.9E-07 | 8.1E-09 | 74199  | vitron                                                |
| Vps13c    | 0.46  | -1.12 | 5.0E-08 | 8.2E-10 | 320528 | vacuolar protein sorting 13C                          |
| Vtn       | 0.54  | -0.89 | 1.0E-04 | 4.9E-06 | 22370  | vitronectin                                           |
| Wbscr17   | 2.87  | 1.52  | 6.2E-08 | 1.1E-09 | 212996 | Williams-Beuren syndrome chromosome region 17 homolog |
| Wbscr27   | 2.19  | 1.13  | 4.6E-05 | 2.0E-06 | 79565  | Williams Beuren syndrome chromosome region 27         |
| Wdyh1     | 1.97  | 0.98  | 1.0E-04 | 5.2E-06 | 76773  | WDYHV motif containing 1                              |
| Whrn      | 5.33  | 2.41  | 3.0E-05 | 1.2E-06 | 73750  | whirlin                                               |
| Wipf3     | 0.55  | -0.89 | 2.5E-08 | 3.6E-10 | 330319 | WAS/WASL interacting protein family, member 3         |
| Wk        | 2.28  | 1.19  | 3.0E-10 | 2.8E-12 | 68151  | wntless homolog                                       |
| Wat5b     | 2.85  | 1.51  | 9.7E-06 | 3.2E-07 | 22419  | wingless-related MMTV integration site 5B             |
| Wsb2      | 1.84  | 0.88  | 1.8E-06 | 4.8E-08 | 59043  | WD repeat and SOCS box-containing 2                   |
| Xpo4      | 0.52  | -0.95 | 5.2E-05 | 2.2E-06 | 57258  | exportin 4                                            |
| Xylt1     | 0.33  | -1.61 | 1.3E-06 | 3.2E-08 | 23781  | xylosyltransferase 1                                  |
| Ybx2      | 0.31  | -1.69 | 3.2E-11 | 2.5E-13 | 53422  | Y box protein 2                                       |
| Zdhd2     | 2.83  | 1.50  | 1.5E-20 | 3.3E-23 | 73884  | zinc finger, DBF-type containing 2                    |
| Zfx4      | 0.48  | -1.05 | 1.6E-06 | 4.0E-08 | 80892  | zinc finger homeodomain 4                             |
| Zfp281    | 0.54  | -0.89 | 2.6E-06 | 7.2E-08 | 226442 | zinc finger protein 281                               |
| Zfp286    | 2.34  | 1.23  | 2.4E-05 | 9.1E-07 | 192651 | zinc finger protein 286                               |
| Zfp365    | 8.30  | 3.05  | 3.6E-10 | 3.6E-12 | 216049 | zinc finger protein 365                               |
| Zfp385a   | 2.40  | 1.26  | 9.5E-15 | 4.2E-17 | 29813  | zinc finger protein 385A                              |
| Zfp46     | 0.63  | -0.67 | 4.1E-05 | 1.7E-06 | 22704  | zinc finger protein 46                                |
| Zfp691    | 0.55  | -0.86 | 8.2E-05 | 3.9E-06 | 195522 | zinc finger protein 691                               |
| Zfp697    | 3.39  | 1.76  | 3.6E-08 | 5.7E-10 | 242109 | zinc finger protein 697                               |
| Zfp703    | 1.95  | 0.96  | 2.1E-06 | 5.6E-08 | 353310 | zinc finger protein 703                               |
| Zfp710    | 0.62  | -0.70 | 6.5E-05 | 2.9E-06 | 209225 | zinc finger protein 710                               |
| Zfp827    | 0.43  | -1.21 | 1.7E-07 | 3.2E-09 | 622675 | zinc finger protein 827                               |
| Zfp866    | 0.57  | -0.80 | 6.9E-05 | 3.2E-06 | 330788 | zinc finger protein 866                               |
| Zfp871    | 0.60  | -0.74 | 5.3E-05 | 2.3E-06 | 208292 | zinc finger protein 871                               |
| Zfp873    | 2.33  | 1.22  | 7.3E-05 | 3.4E-06 | 408062 | zinc finger protein 873                               |
| Zfr2      | 2.86  | 1.51  | 2.3E-06 | 6.3E-08 | 103406 | zinc finger RNA binding protein 2                     |
| Zmat3     | 1.87  | 0.90  | 6.7E-05 | 3.0E-06 | 22401  | zinc finger matrin type 3                             |
| Zmym2     | 0.61  | -0.72 | 2.3E-06 | 6.4E-08 | 76007  | zinc finger, MYM-type 2                               |

upregulated (red)

downregulated (blue)

Supplementary Table 1e: Normalized reads at exons 1 to 6 of the *Spin1* gene in SkM of *Spin1*<sup>MS</sup> and control mice at P21, E16.5, and E15.5.

| P21  |                                           |                  |                                    |                |  |
|------|-------------------------------------------|------------------|------------------------------------|----------------|--|
| Exon | FC ( <i>Spin1</i> <sup>MS</sup> vs. Ctrl) | p-value (t-test) | average <i>Spin1</i> <sup>MS</sup> | average Ctrl   |  |
| 1    | 1.11                                      | 6.8E-01          | 12.7 +/- 2.6                       | 11.5 +/- 5.1   |  |
| 2    | 1.15                                      | 4.5E-01          | 53.8 +/- 16.6                      | 46.8 +/- 5.1   |  |
| 3    | 0.94                                      | 7.4E-01          | 16.6 +/- 3.3                       | 17.6 +/- 5.2   |  |
| 4    | 0.37                                      | 1.0E-02          | 21.8 +/- 3.4                       | 59.5 +/- 20.0  |  |
| 5    | 1.05                                      | 6.9E-01          | 86.3 +/- 11.9                      | 82.4 +/- 14.5  |  |
| 6    | 1.14                                      | 1.5E-01          | 917.4 +/- 116.6                    | 803.0 +/- 75.1 |  |

  

| E16.5 |                                           |                  |                                    |                 |  |
|-------|-------------------------------------------|------------------|------------------------------------|-----------------|--|
| Exon  | FC ( <i>Spin1</i> <sup>MS</sup> vs. Ctrl) | p-value (t-test) | average <i>Spin1</i> <sup>MS</sup> | average Ctrl    |  |
| 1     | 1.35                                      | 9.1E-02          | 35.3 +/- 5.8                       | 26.1 +/- 5.7    |  |
| 2     | 1.25                                      | 2.4E-02          | 120.9 +/- 11.0                     | 96.4 +/- 9.3    |  |
| 3     | 1.11                                      | 2.4E-01          | 36.0 +/- 4.7                       | 32.5 +/- 2.3    |  |
| 4     | 0.46                                      | 1.2E-04          | 72.4 +/- 13.1                      | 158.7 +/- 8.3   |  |
| 5     | 1.05                                      | 5.6E-01          | 165.2 +/- 15.6                     | 157.3 +/- 17.2  |  |
| 6     | 1.14                                      | 2.9E-02          | 2178.7 +/- 152.6                   | 1918.2 +/- 75.3 |  |

  

| E15.5 |                                           |                  |                                    |                  |  |
|-------|-------------------------------------------|------------------|------------------------------------|------------------|--|
| Exon  | FC ( <i>Spin1</i> <sup>MS</sup> vs. Ctrl) | p-value (t-test) | average <i>Spin1</i> <sup>MS</sup> | average Ctrl     |  |
| 1     | 1.10                                      | 4.3E-01          | 31.2 +/- 5.2                       | 28.3 +/- 3.9     |  |
| 2     | 1.10                                      | 1.2E-01          | 125.7 +/- 2.5                      | 114.7 +/- 9.7    |  |
| 3     | 1.07                                      | 2.9E-01          | 41.8 +/- 4.4                       | 39.0 +/- 1.7     |  |
| 4     | 0.76                                      | 8.5E-03          | 125.0 +/- 4.1                      | 165.2 +/- 15.8   |  |
| 5     | 1.07                                      | 1.2E-01          | 199.1 +/- 6.3                      | 185.2 +/- 11.5   |  |
| 6     | 1.09                                      | 1.0E-01          | 2361.9 +/- 121.0                   | 2162.2 +/- 139.2 |  |

The targeted exon 4 is highlighted in green.
